# Supplementary material
Source: PubMed Central journal article supplement (PMC2859677)

## ***Supporting Data***

### **Structure-Activity Relationships in TLR2-agonistic Diacylthioglycerol Lipopeptides**

*Wenyan Wu, Rongti Li, Lakshmi S. Malladi,  
Hemamali J. Warshakoon,  
Matthew R. Kimbrell, Michael W. Amolins, Rehman Ukani,  
Apurba Datta,  
and  
Sunil A. David\**

<sup>1</sup>H, <sup>13</sup>C NMR, and Mass-Spectral Data  
of all key intermediates and final compounds

<sup>1</sup>H NMR Spectrum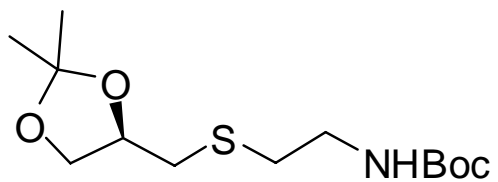**3a**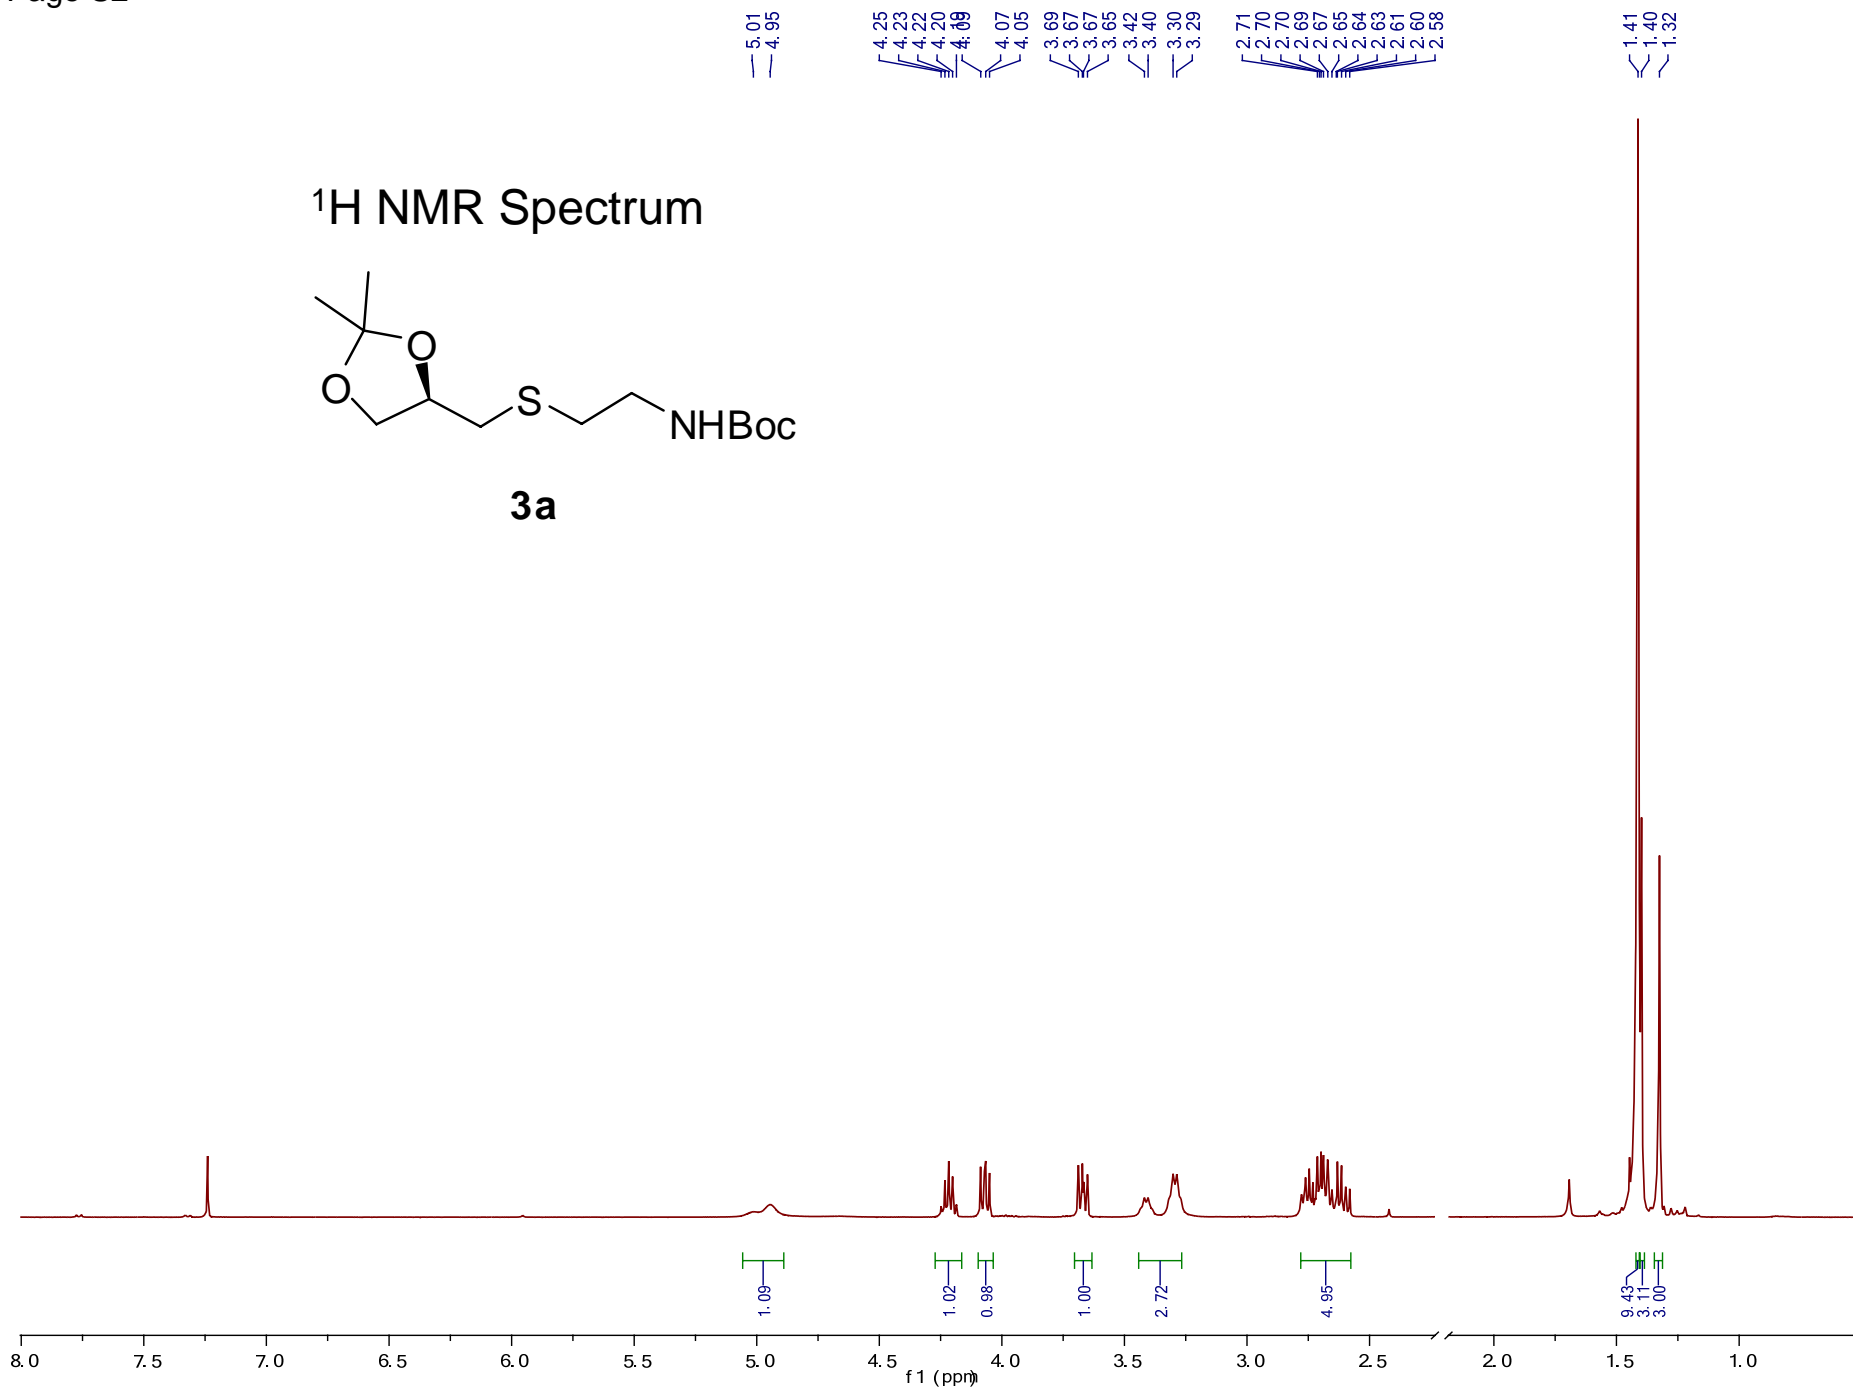

155.58

109.67

79.48

75.58

68.82

39.79

34.97

33.01

28.40

26.90

25.55

### <sup>13</sup>C NMR Spectrum

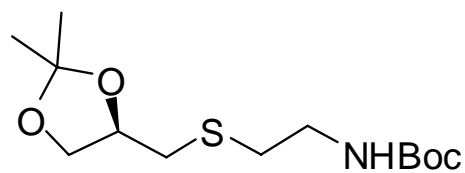

**3a**

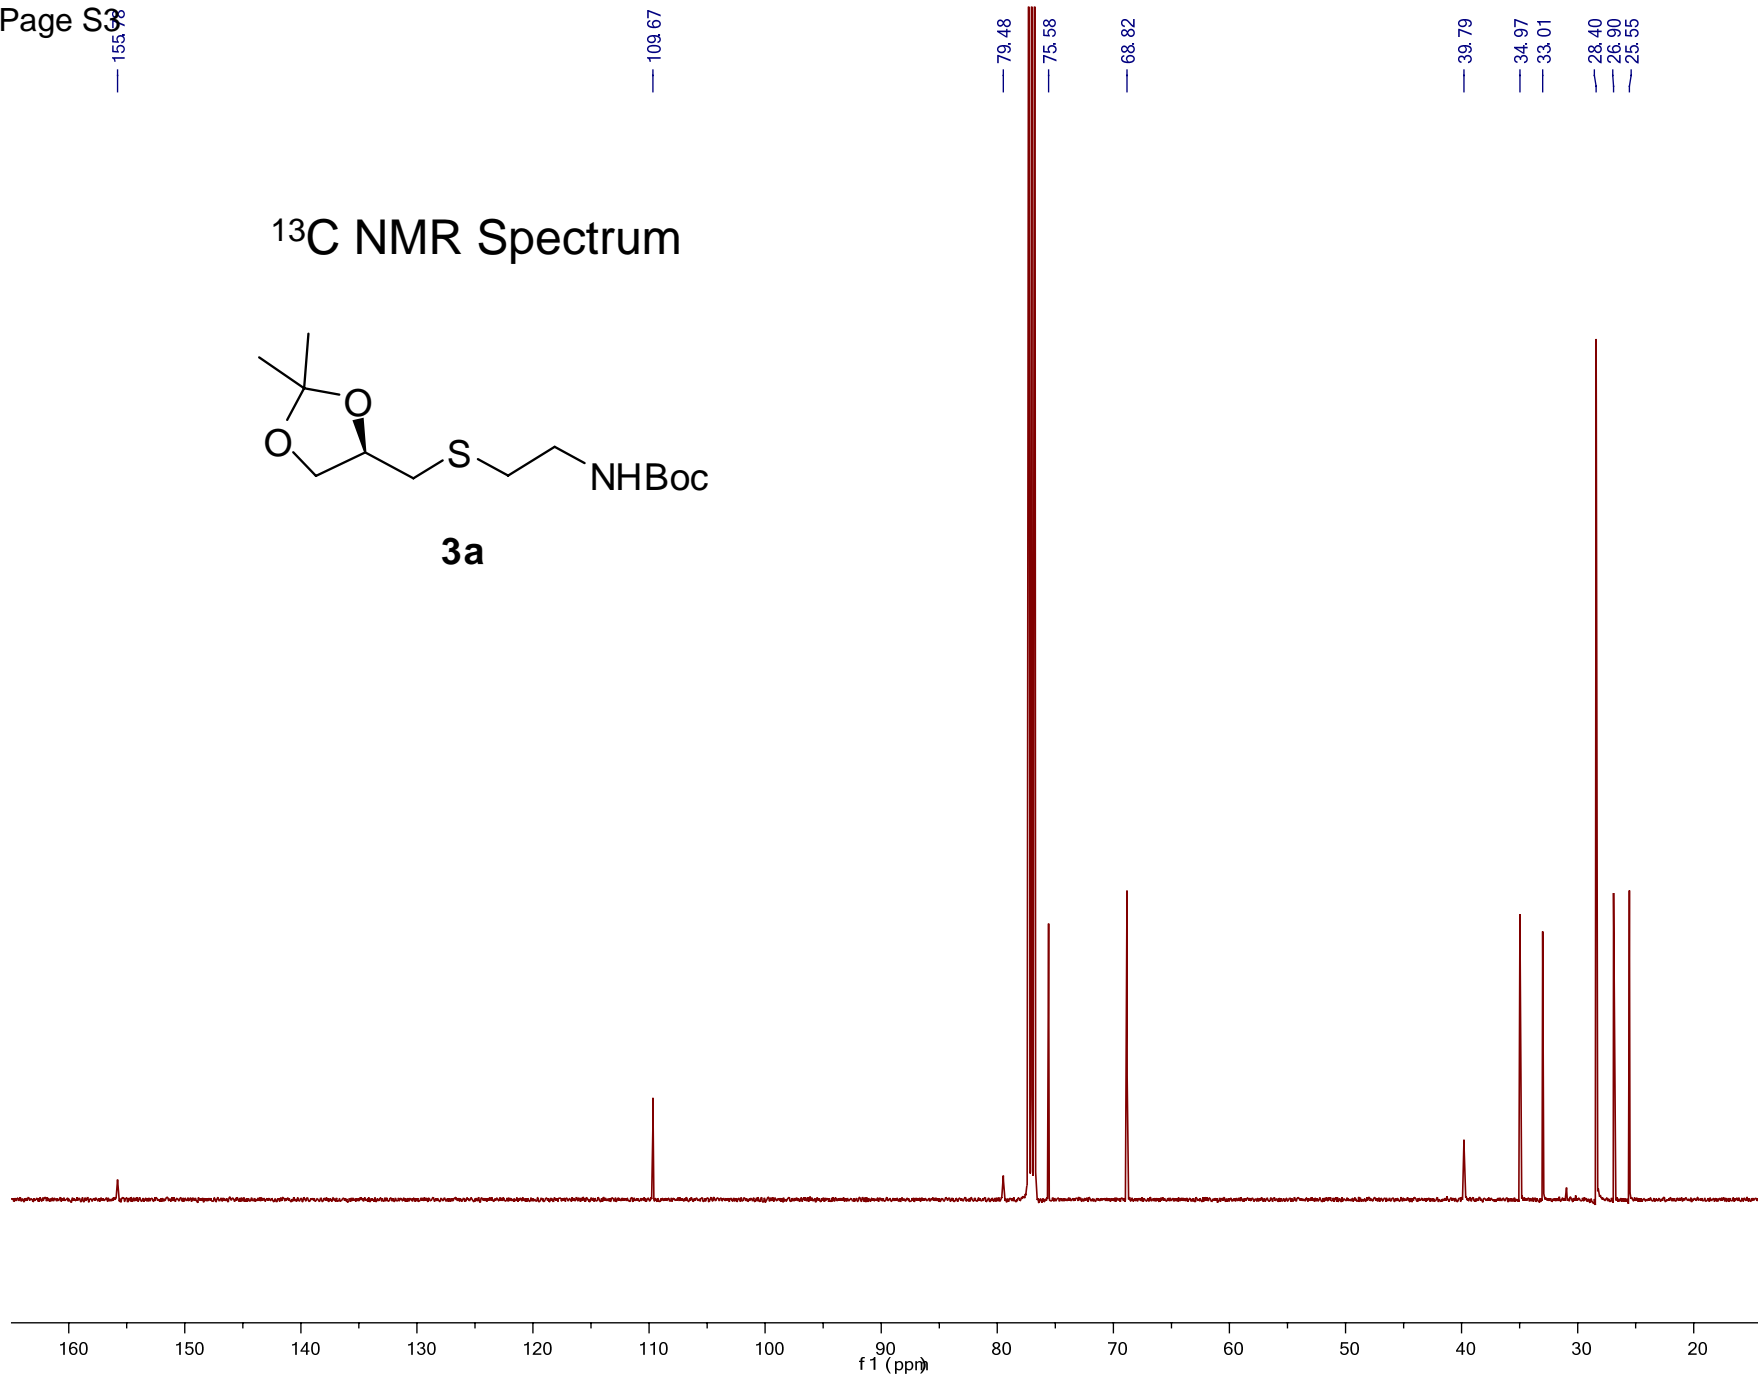

$^1\text{H}$  NMR Spectrum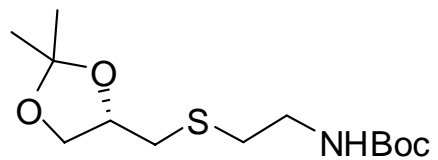**3b**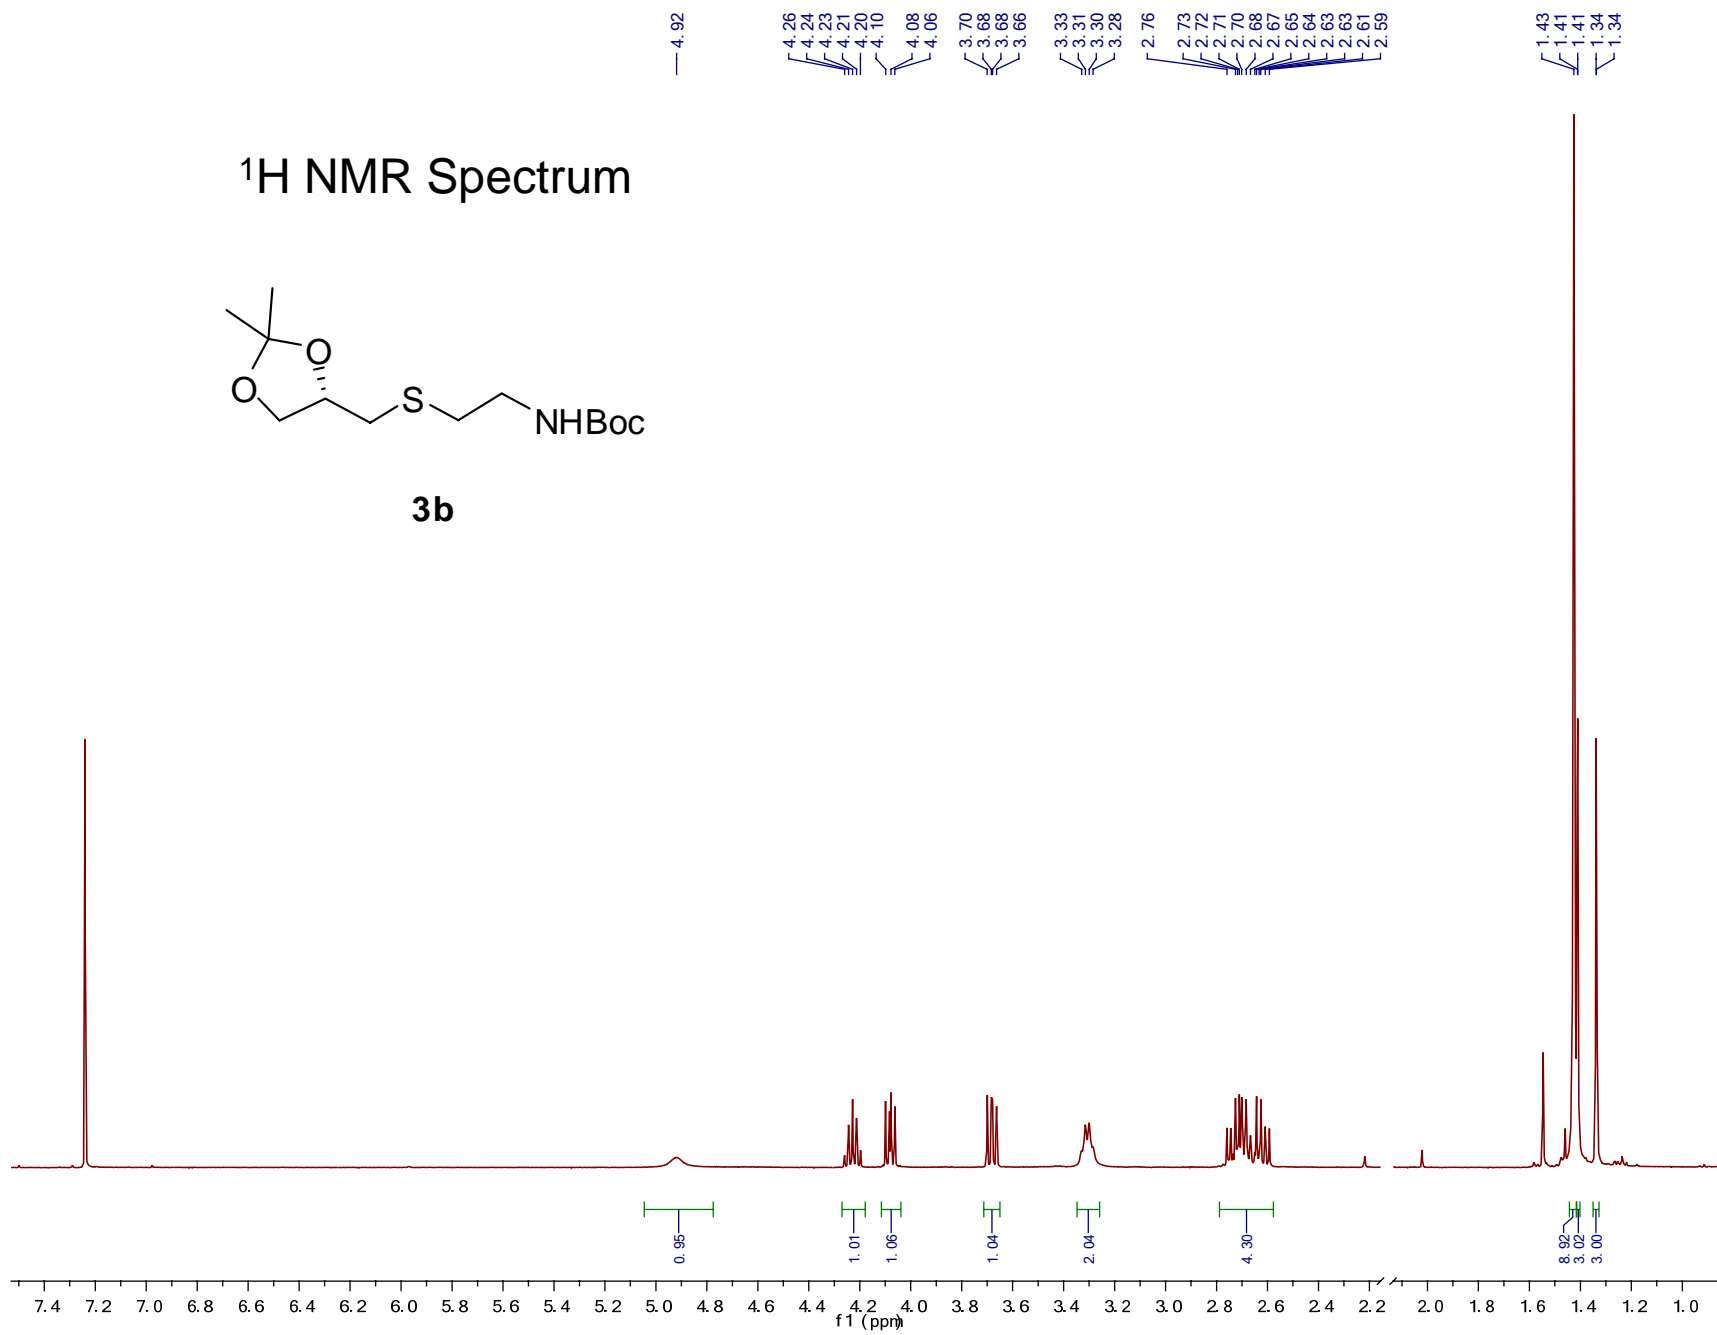

— 155.78

— 109.65

— 79.45

— 75.57

— 68.81

— 39.80

— 34.95

— 32.98

— 28.40

— 26.89

— 25.54

 $^{13}\text{C}$  NMR Spectrum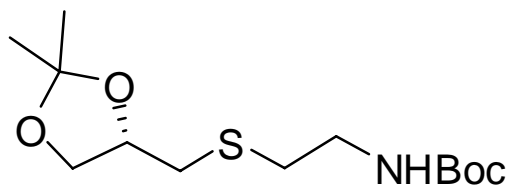**3b**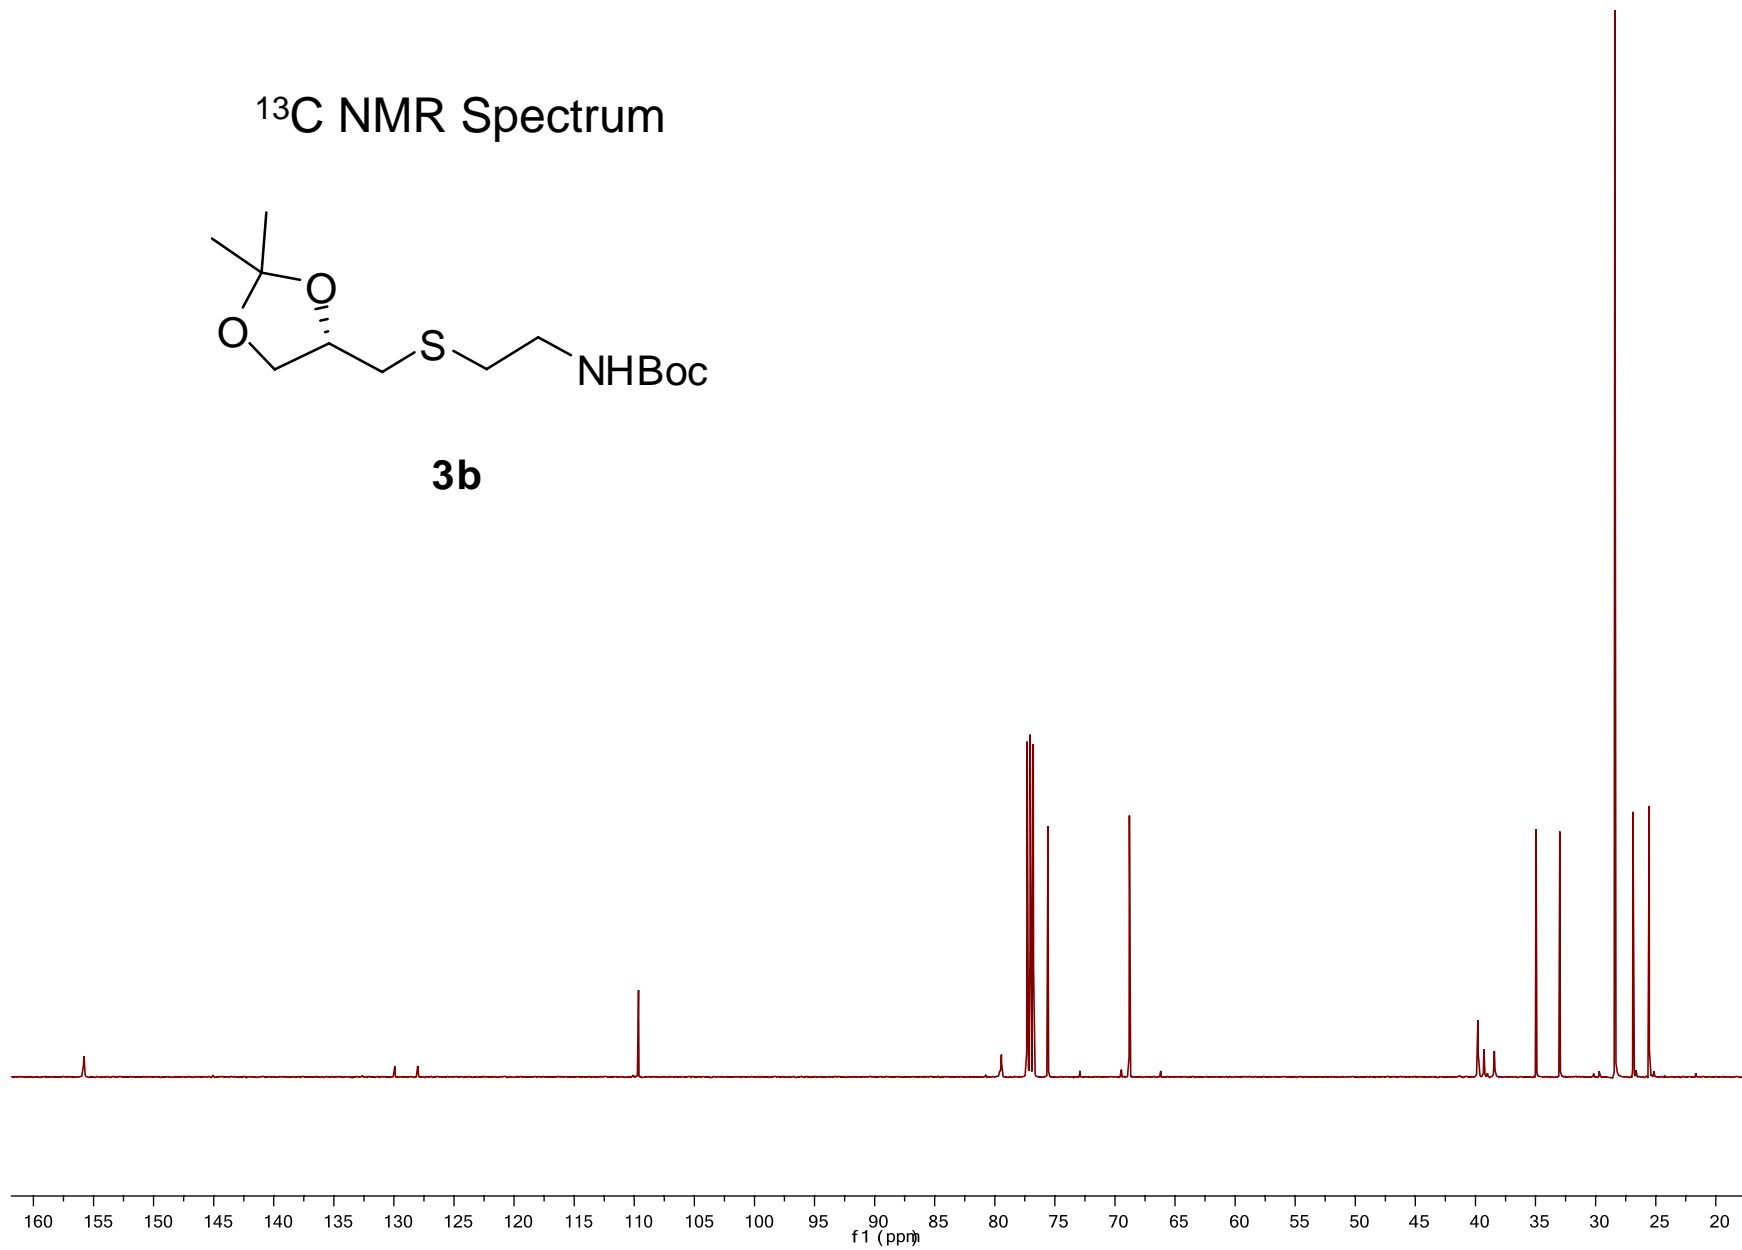

L040201 17 (0.915) Cm (17:22)

1: TOF MS ES+  
4.26e4

Calc M+H = C<sub>13</sub>H<sub>26</sub>NO<sub>4</sub>S = 292.1582, 4.1 ppm  
Calc M+Na = C<sub>13</sub>H<sub>25</sub>NO<sub>4</sub>SNa = 314.1402, 1.3 ppm

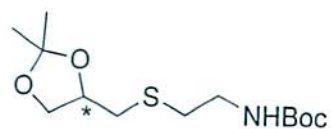

3a R  
3b S

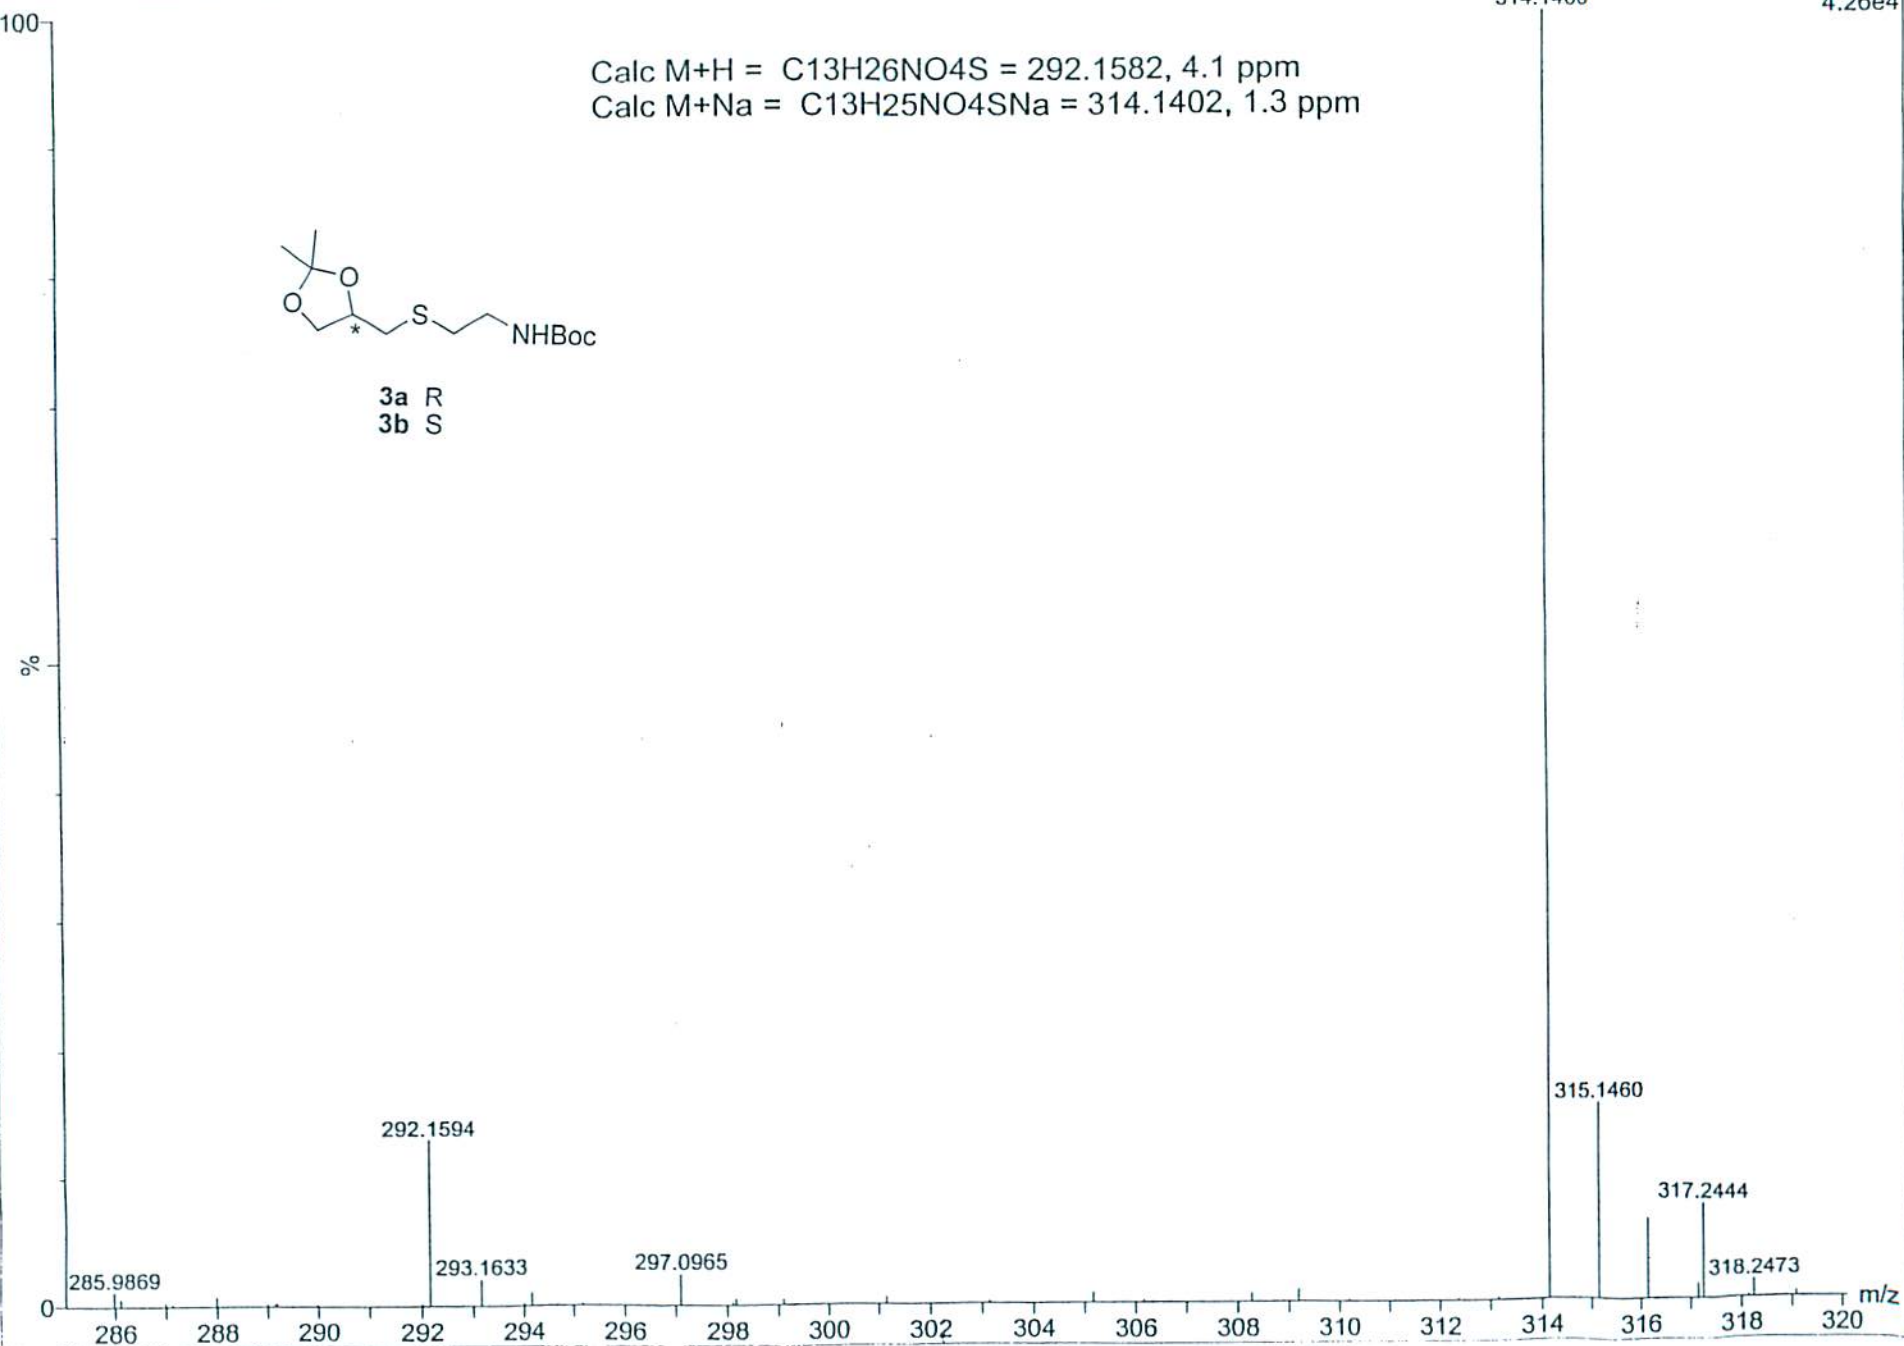

7.79  
7.767.35  
7.33

4.93

3.80  
3.78  
3.77  
3.76  
3.72  
3.71  
3.69  
3.68  
3.67  
3.56  
3.53  
3.32  
3.312.75  
2.73  
2.71  
2.70  
2.67  
2.65  
2.63  
2.63  
2.61  
2.59  
2.57

1.42

 $^1\text{H}$  NMR Spectrum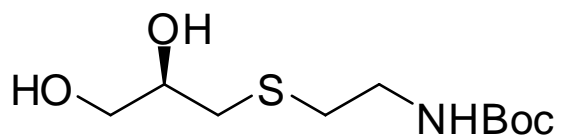

4a

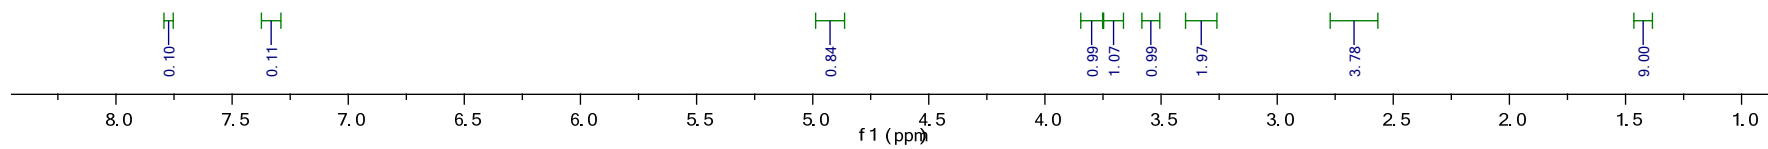

— 156.20

— 79.80

— 70.40

— 65.26

— 39.85

— 35.53

— 32.96

— 28.40

 $^{13}\text{C}$  NMR Spectrum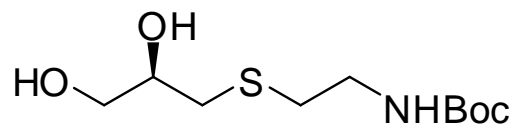

4a

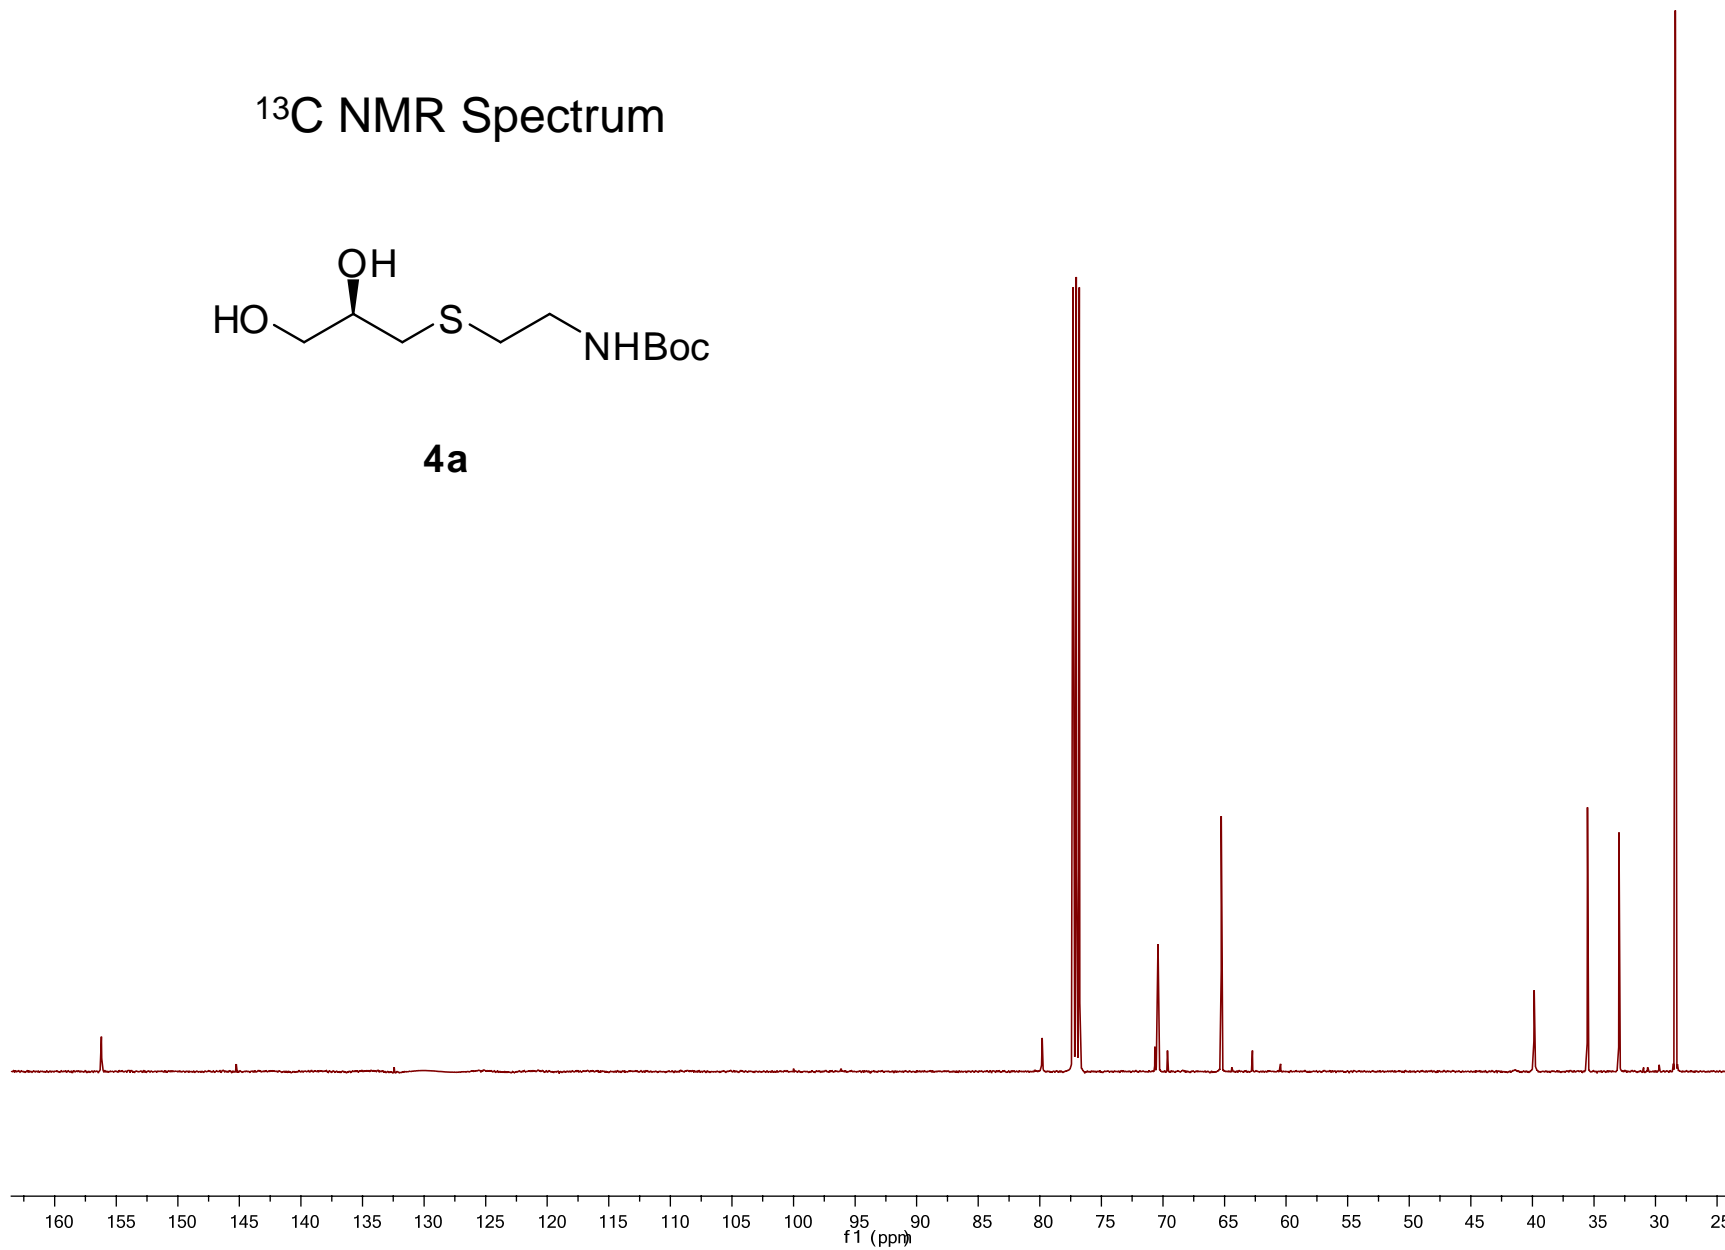



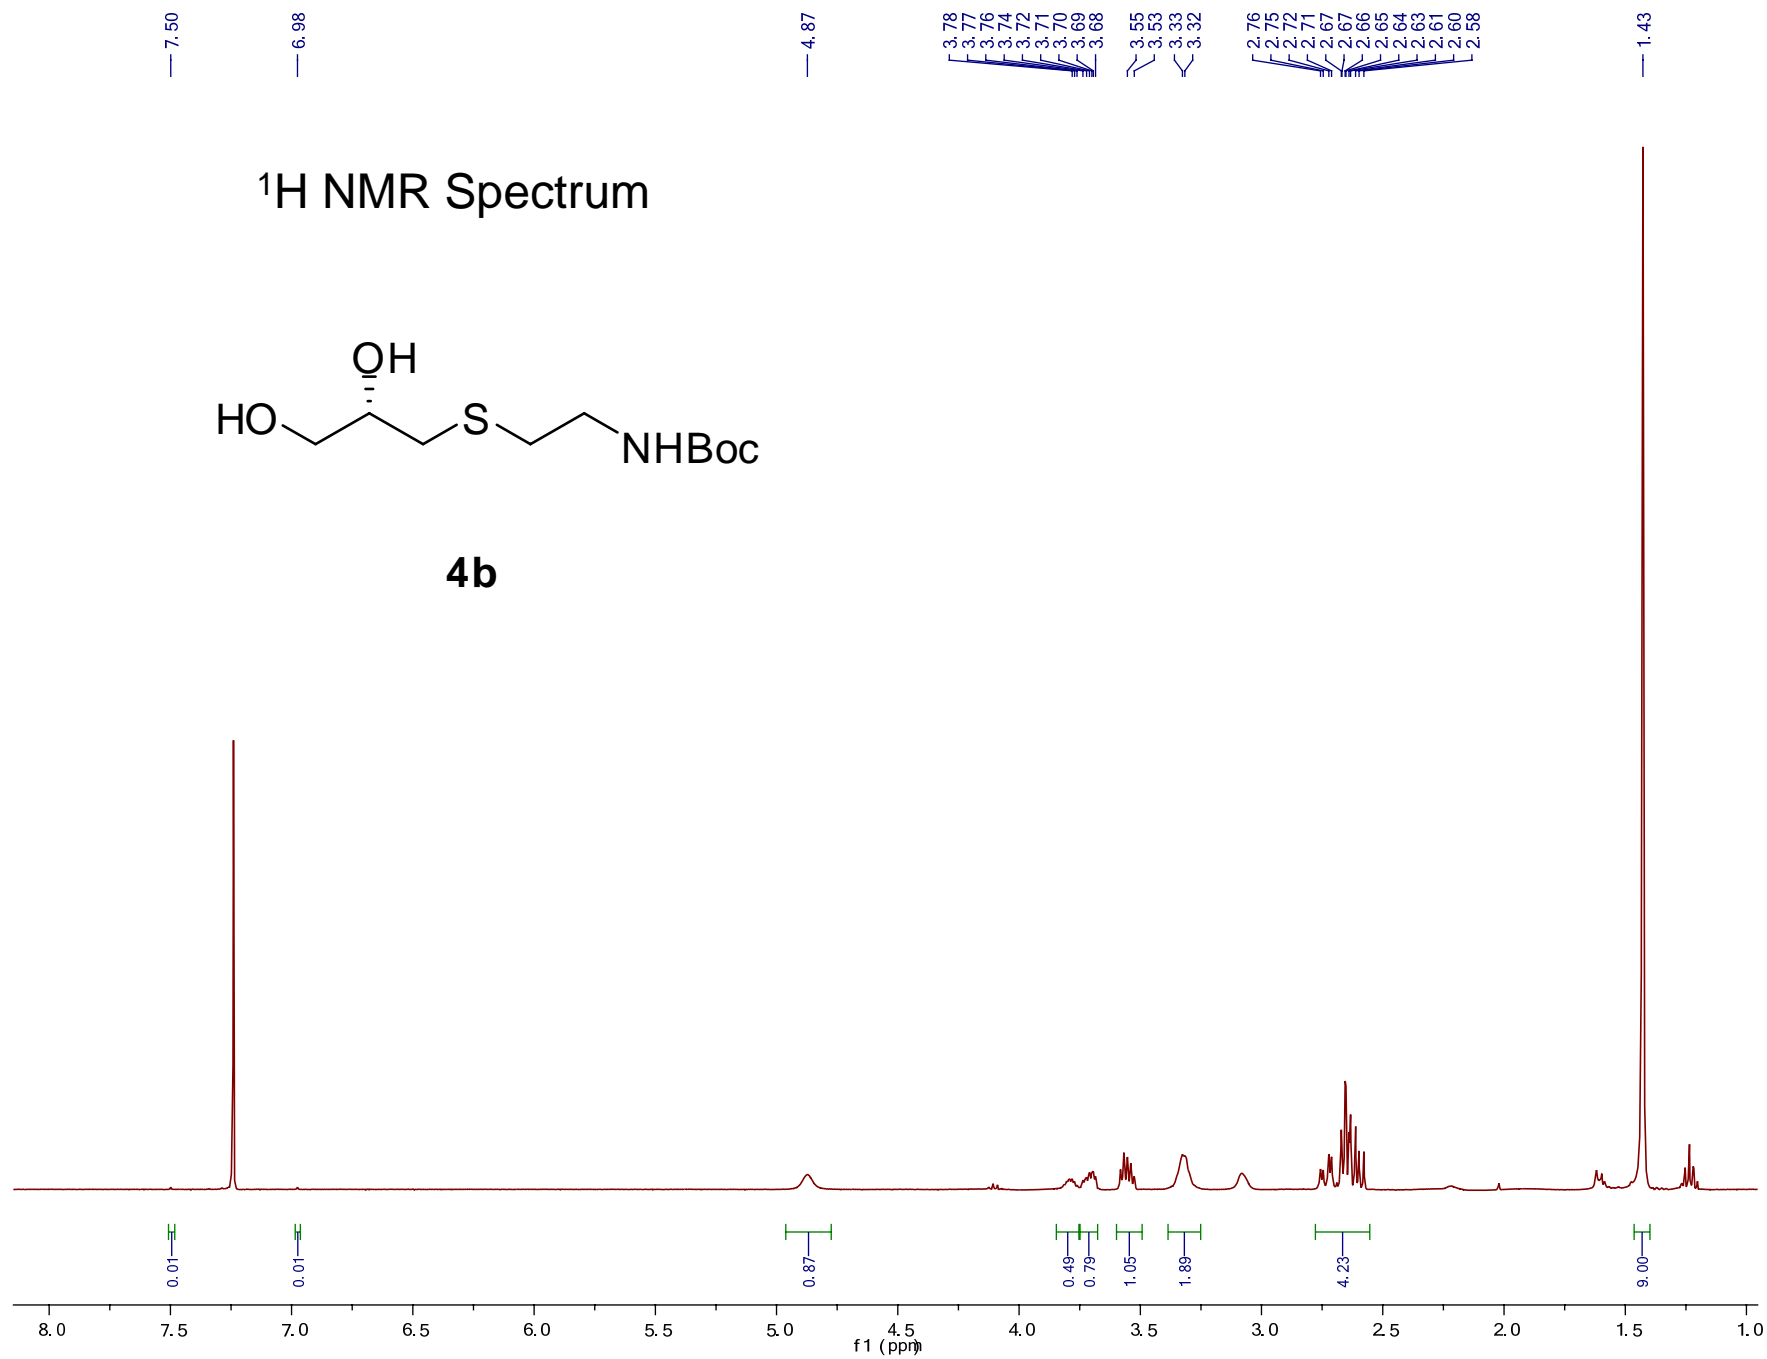

L040204 30 (1.583) Cm (30:41)

1: TOF MS ES+  
1.51e4

Calc M+H = C<sub>10</sub>H<sub>22</sub>NO<sub>4</sub>S = 252.1269, 2.8 ppm  
Calc M+Na = C<sub>10</sub>H<sub>21</sub>NO<sub>4</sub>SNa = 274.1089, 3.3 ppm

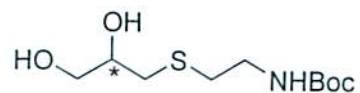

4a R  
4b S

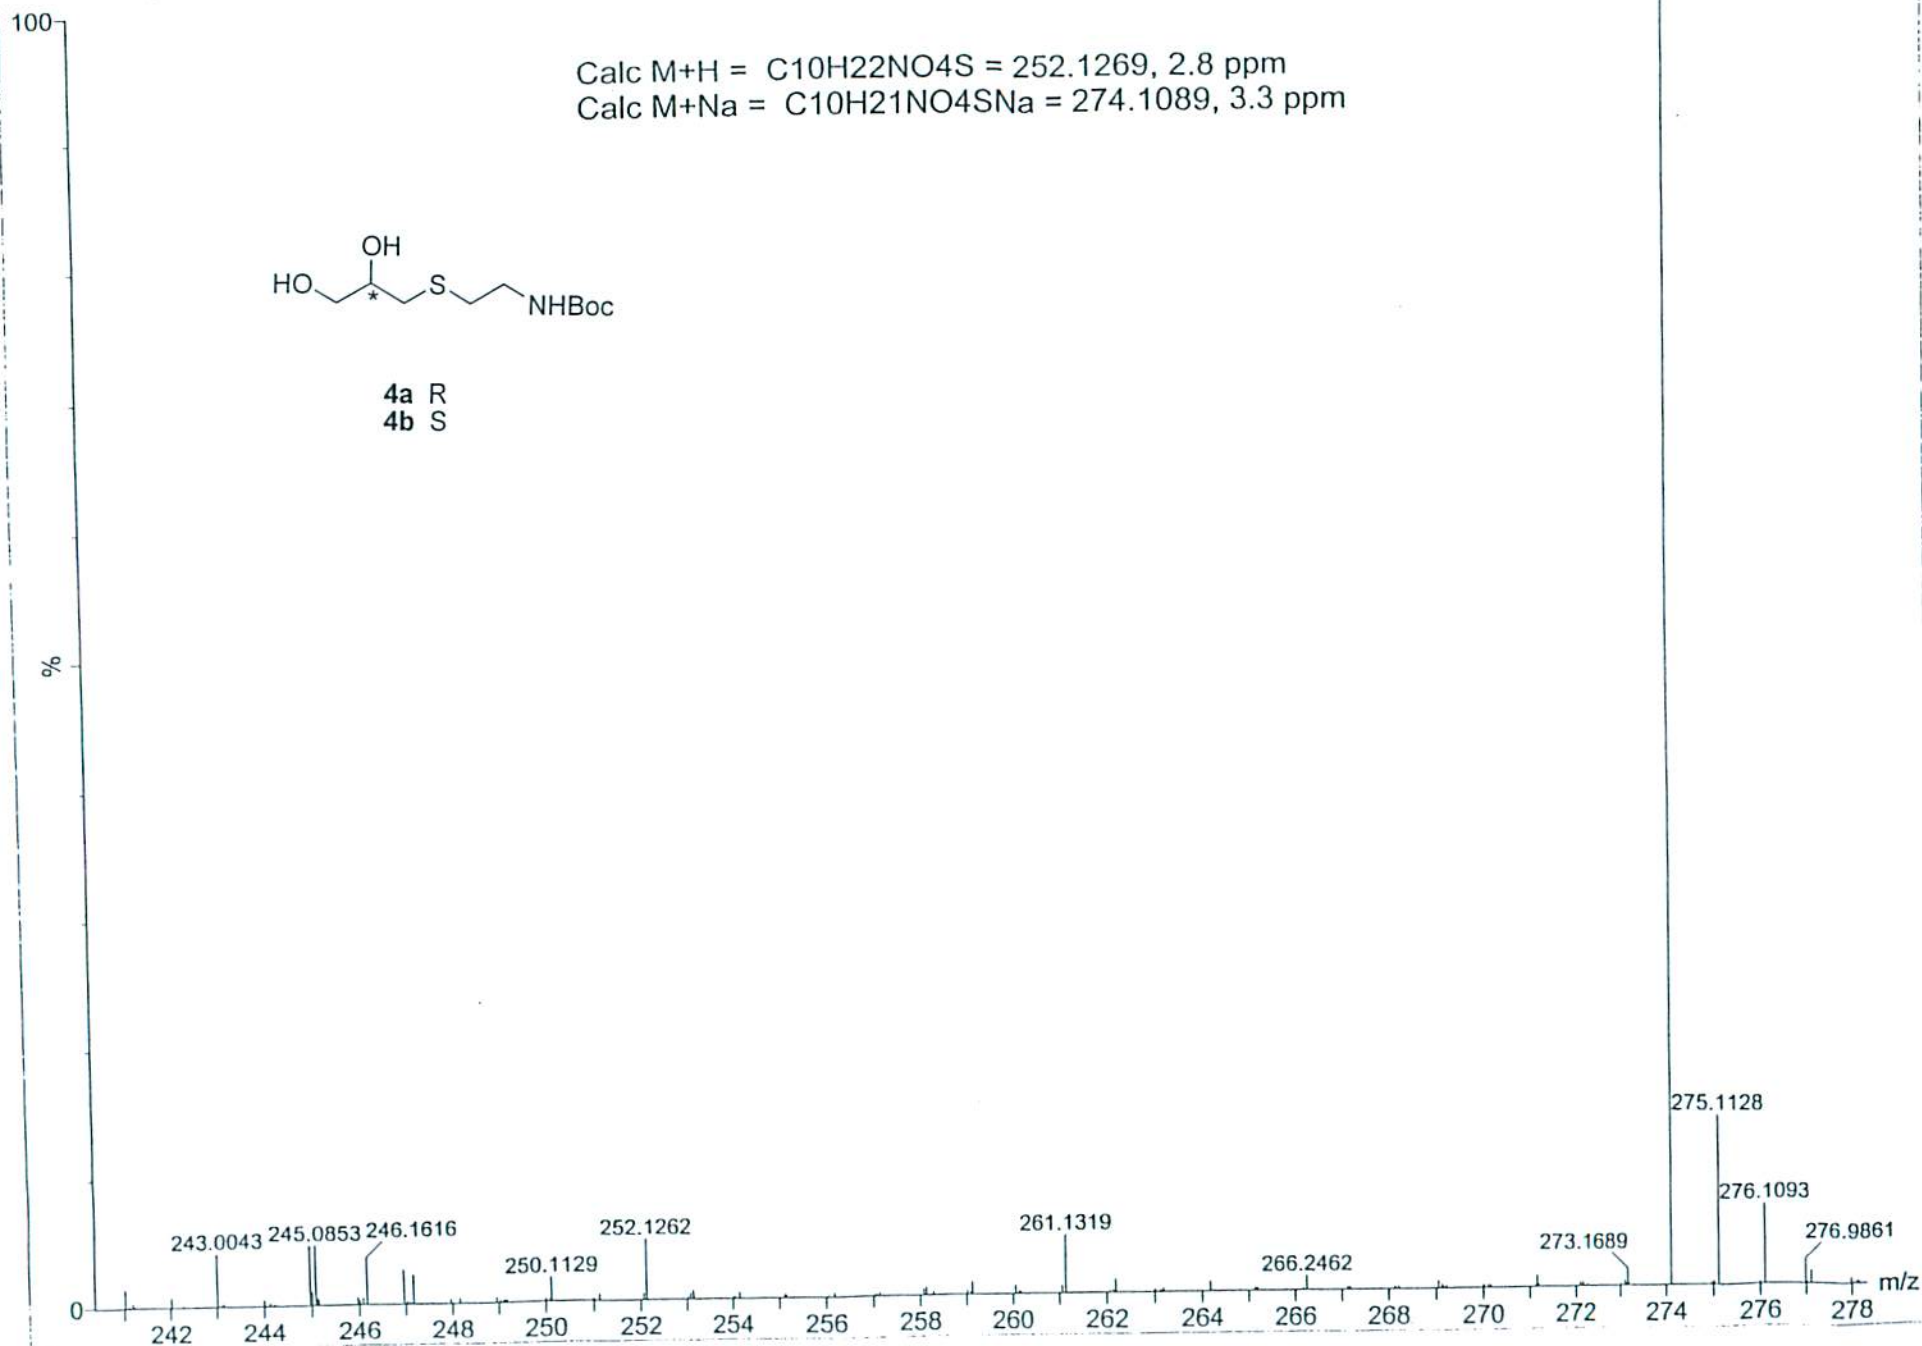

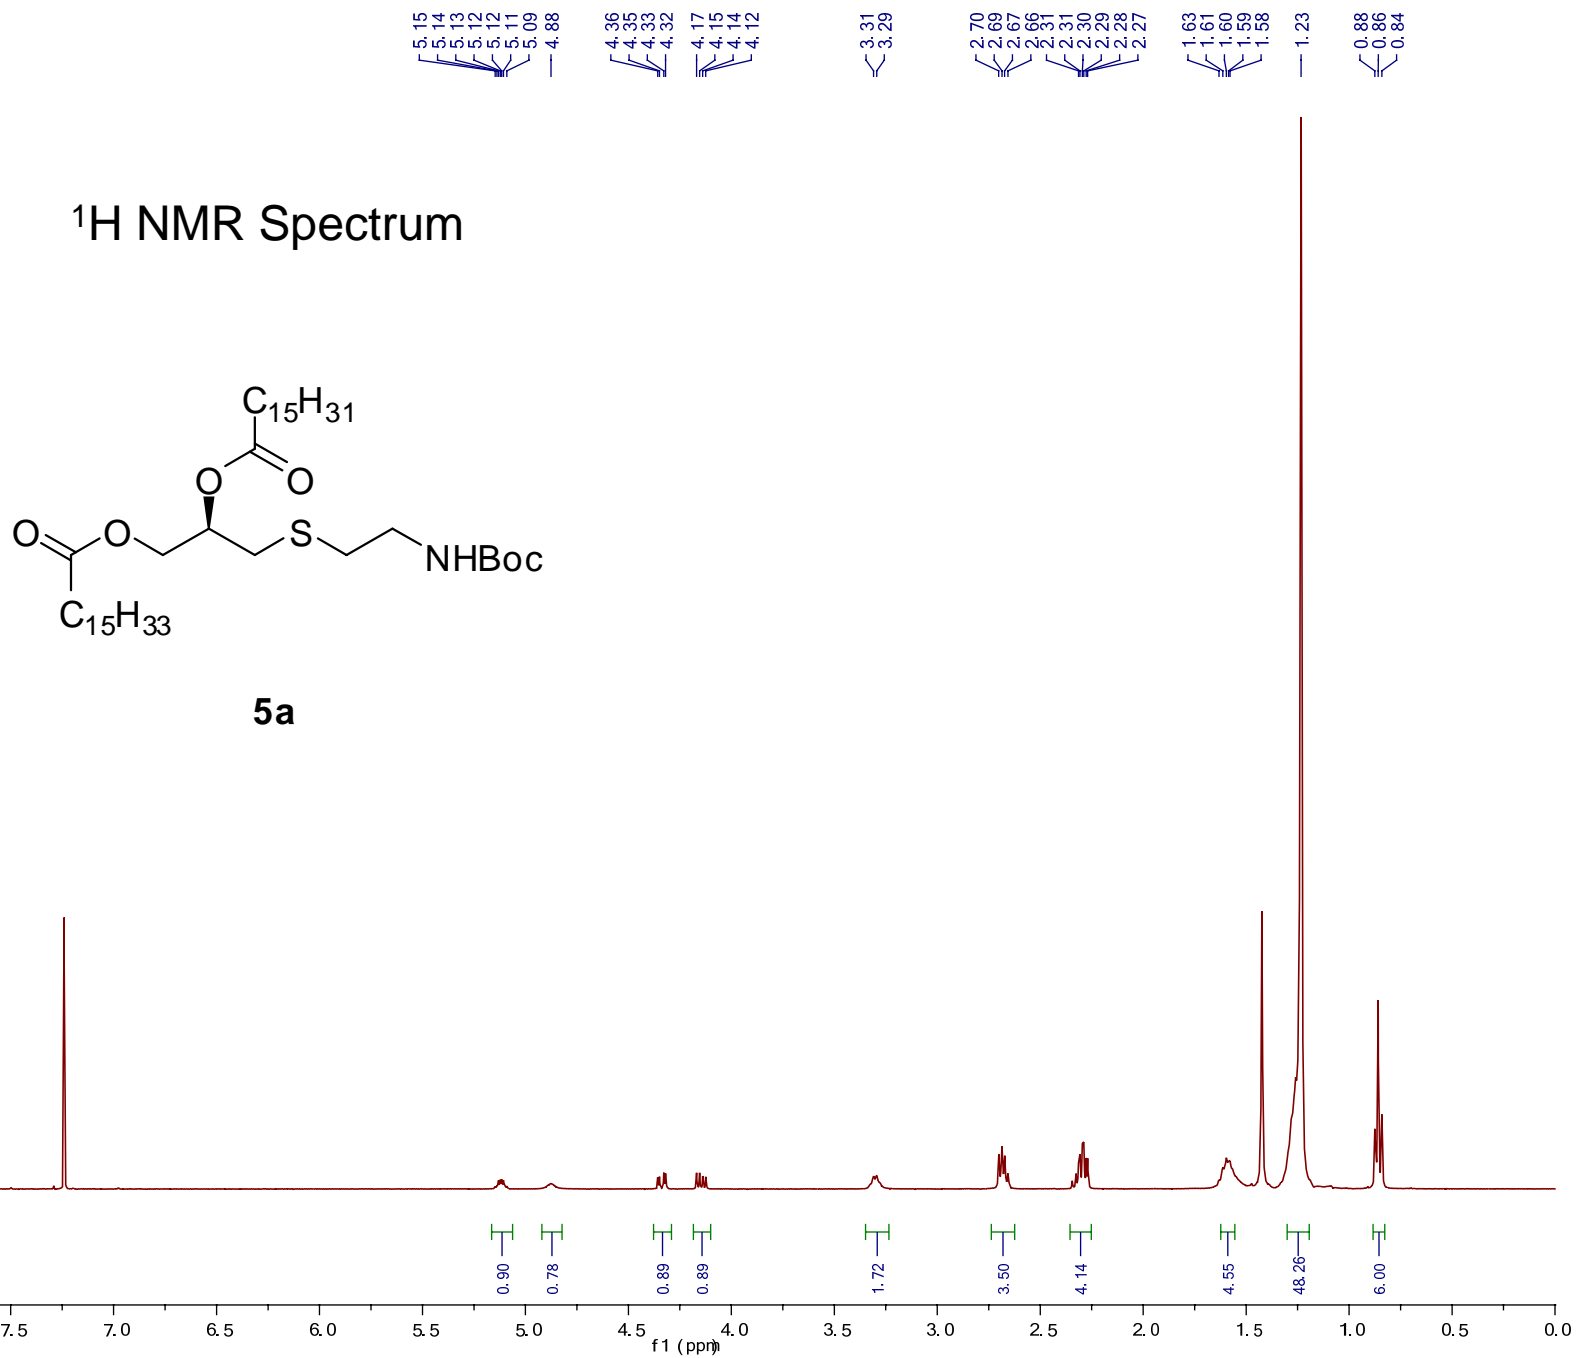

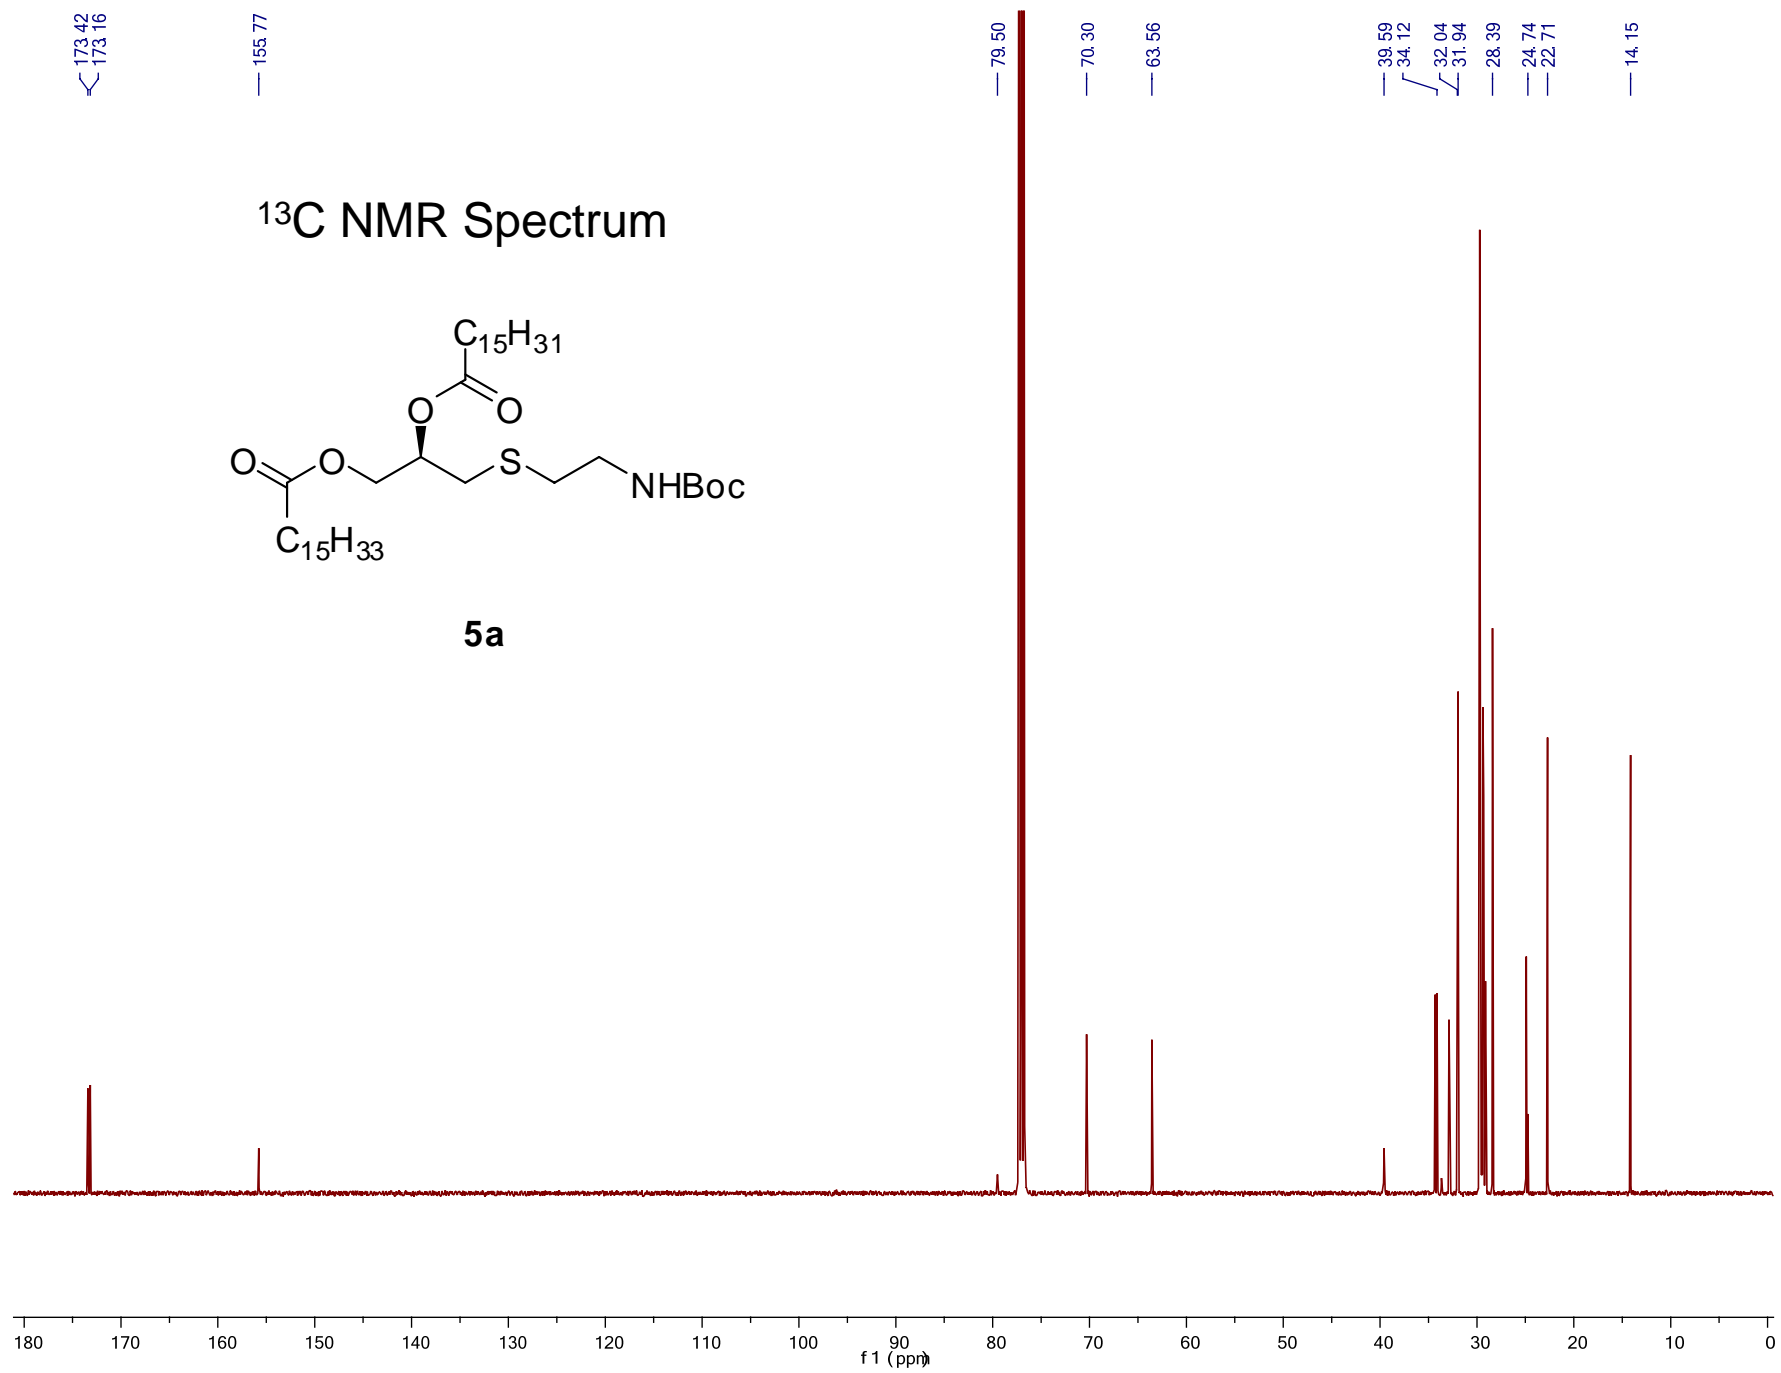

$^1\text{H}$  NMR Spectrum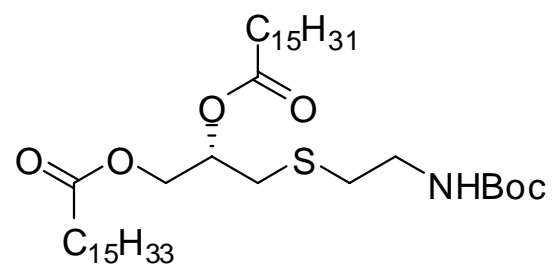**5b**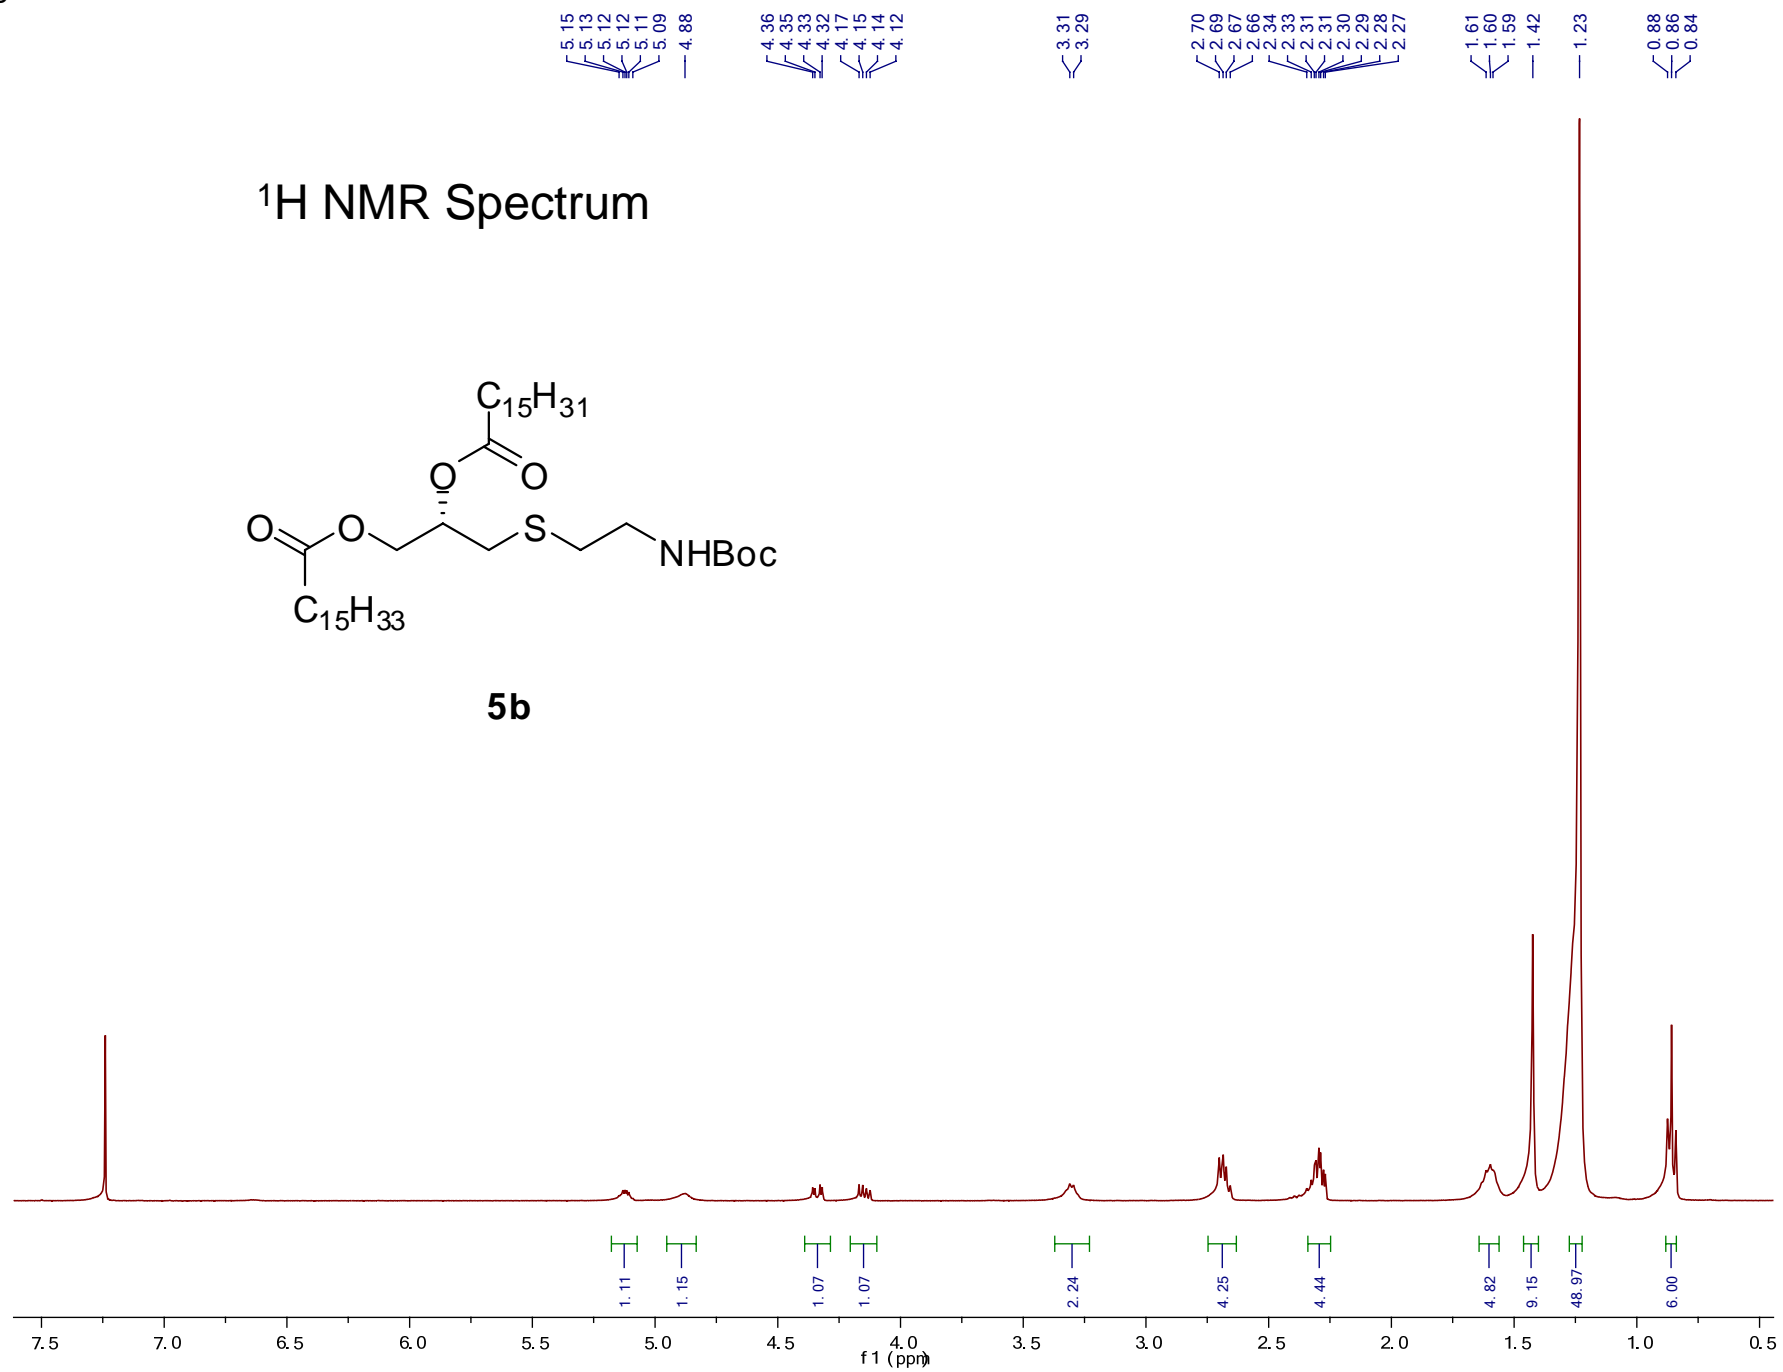

L040502 20 (1.056) Cm (16:20)

1: TOF MS ES+  
4.35e5

Calc M+H = C<sub>42</sub>H<sub>82</sub>NO<sub>6</sub>S = 728.5863, 0.7 ppm  
Calc M+Na = C<sub>42</sub>H<sub>81</sub>NO<sub>6</sub>SNa = 750.5682, 1.5 ppm

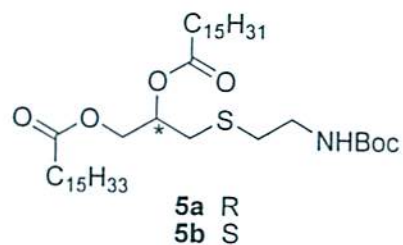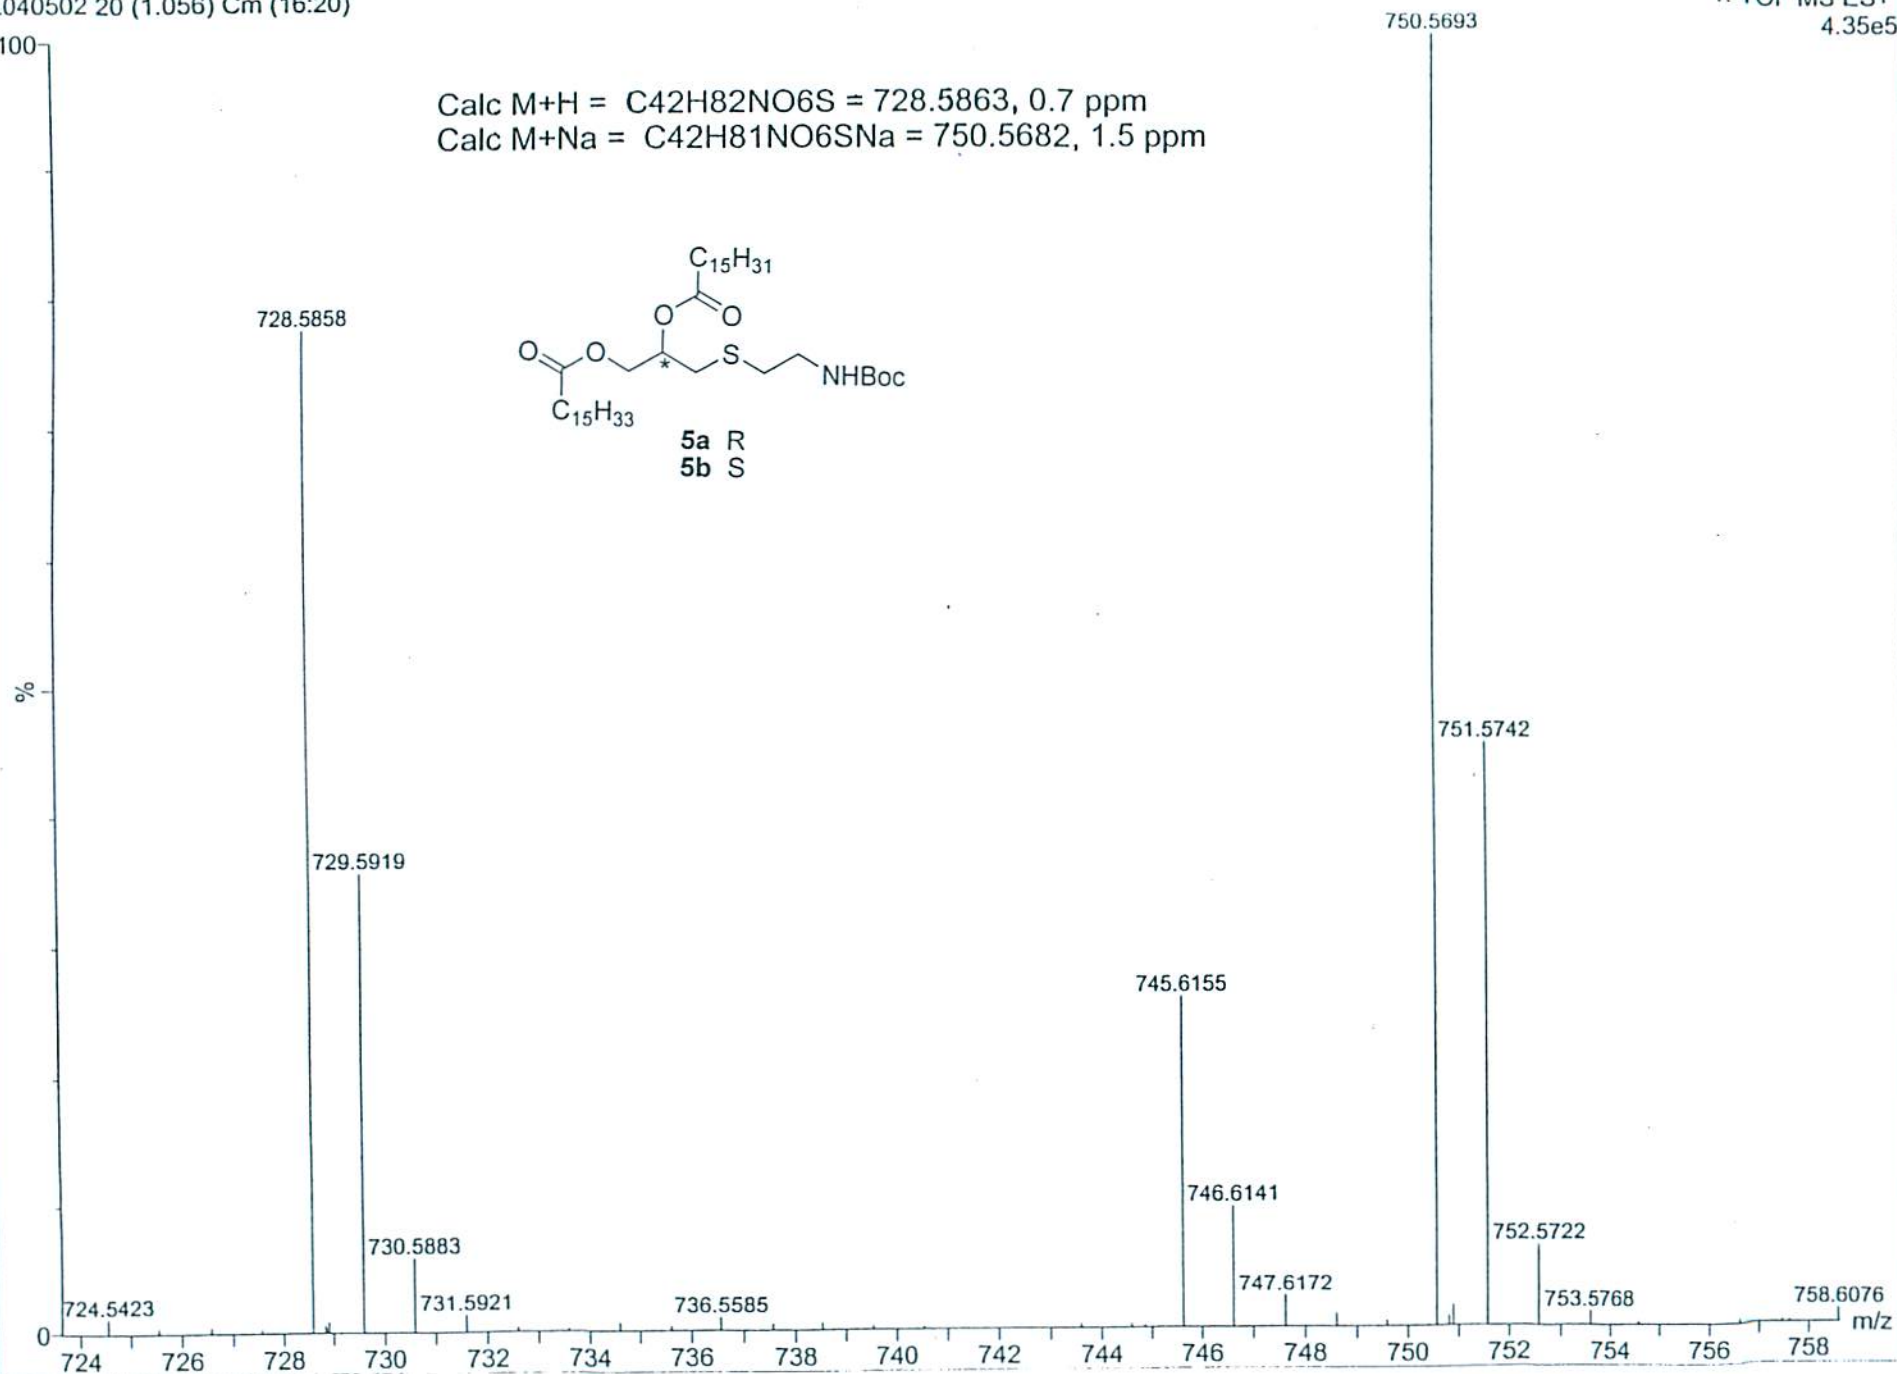

— 7.83

— 5.75

5.13  
5.12  
5.11  
5.10  
5.09  
5.084.32  
4.31  
4.29  
4.284.12  
4.11  
4.09  
4.083.01  
2.99  
2.972.85  
2.81  
2.75  
2.71  
2.68  
2.29  
2.28  
2.26  
2.24  
2.19  
2.17  
2.151.51  
1.49  
1.471.30  
1.28  
1.23  
1.180.86  
0.84  
0.83<sup>1</sup>H NMR Spectrum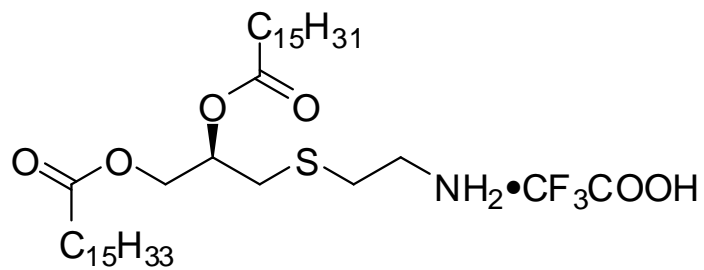**6a**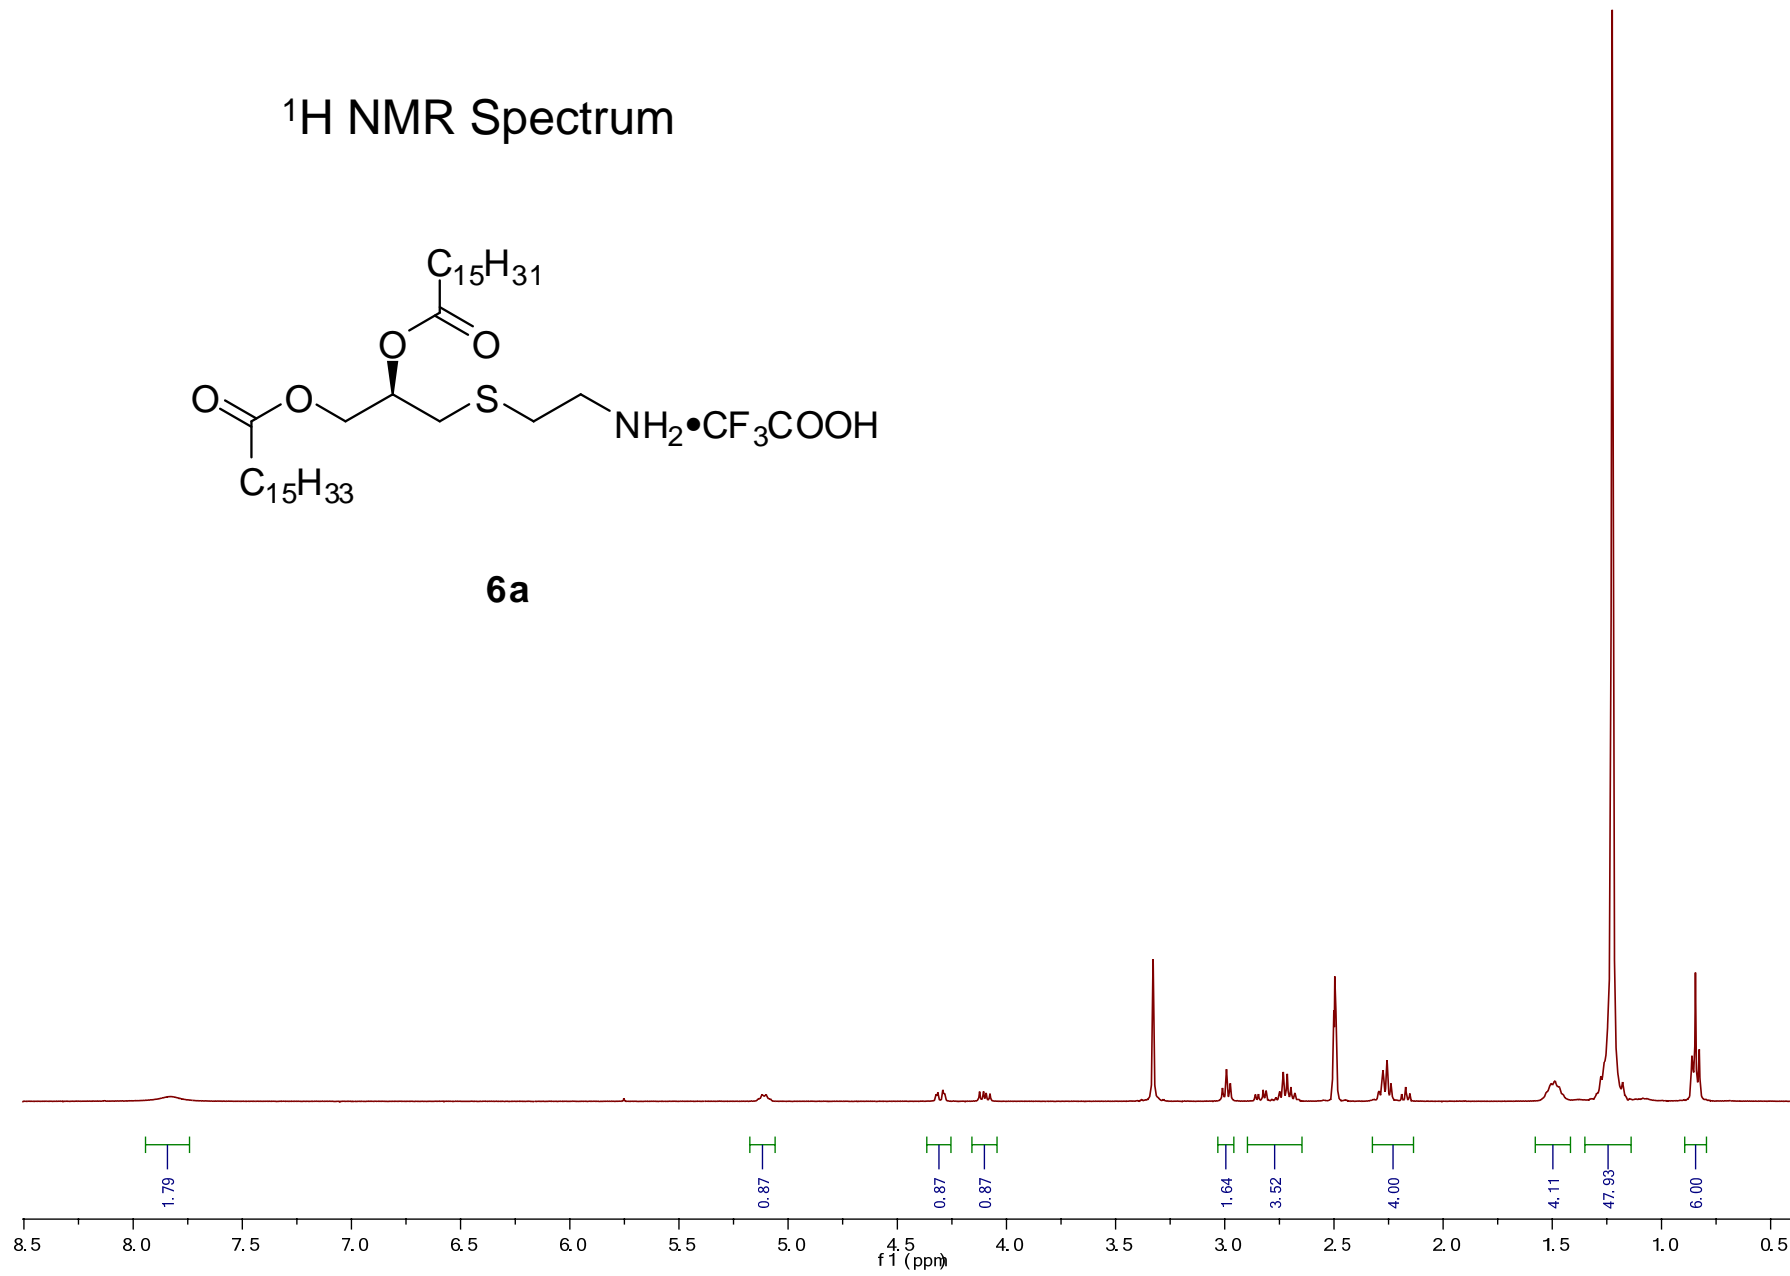

172.47  
172.29

69.64

63.47

38.23

33.53

31.29

28.42

24.47

22.08

13.91

 $^{13}\text{C}$  NMR Spectrum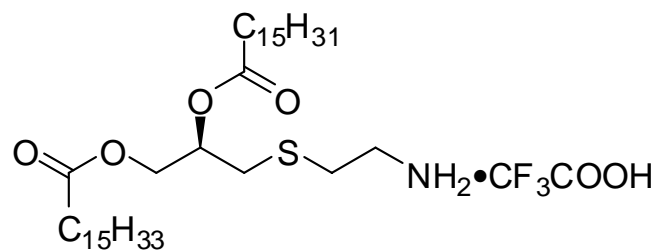

6a

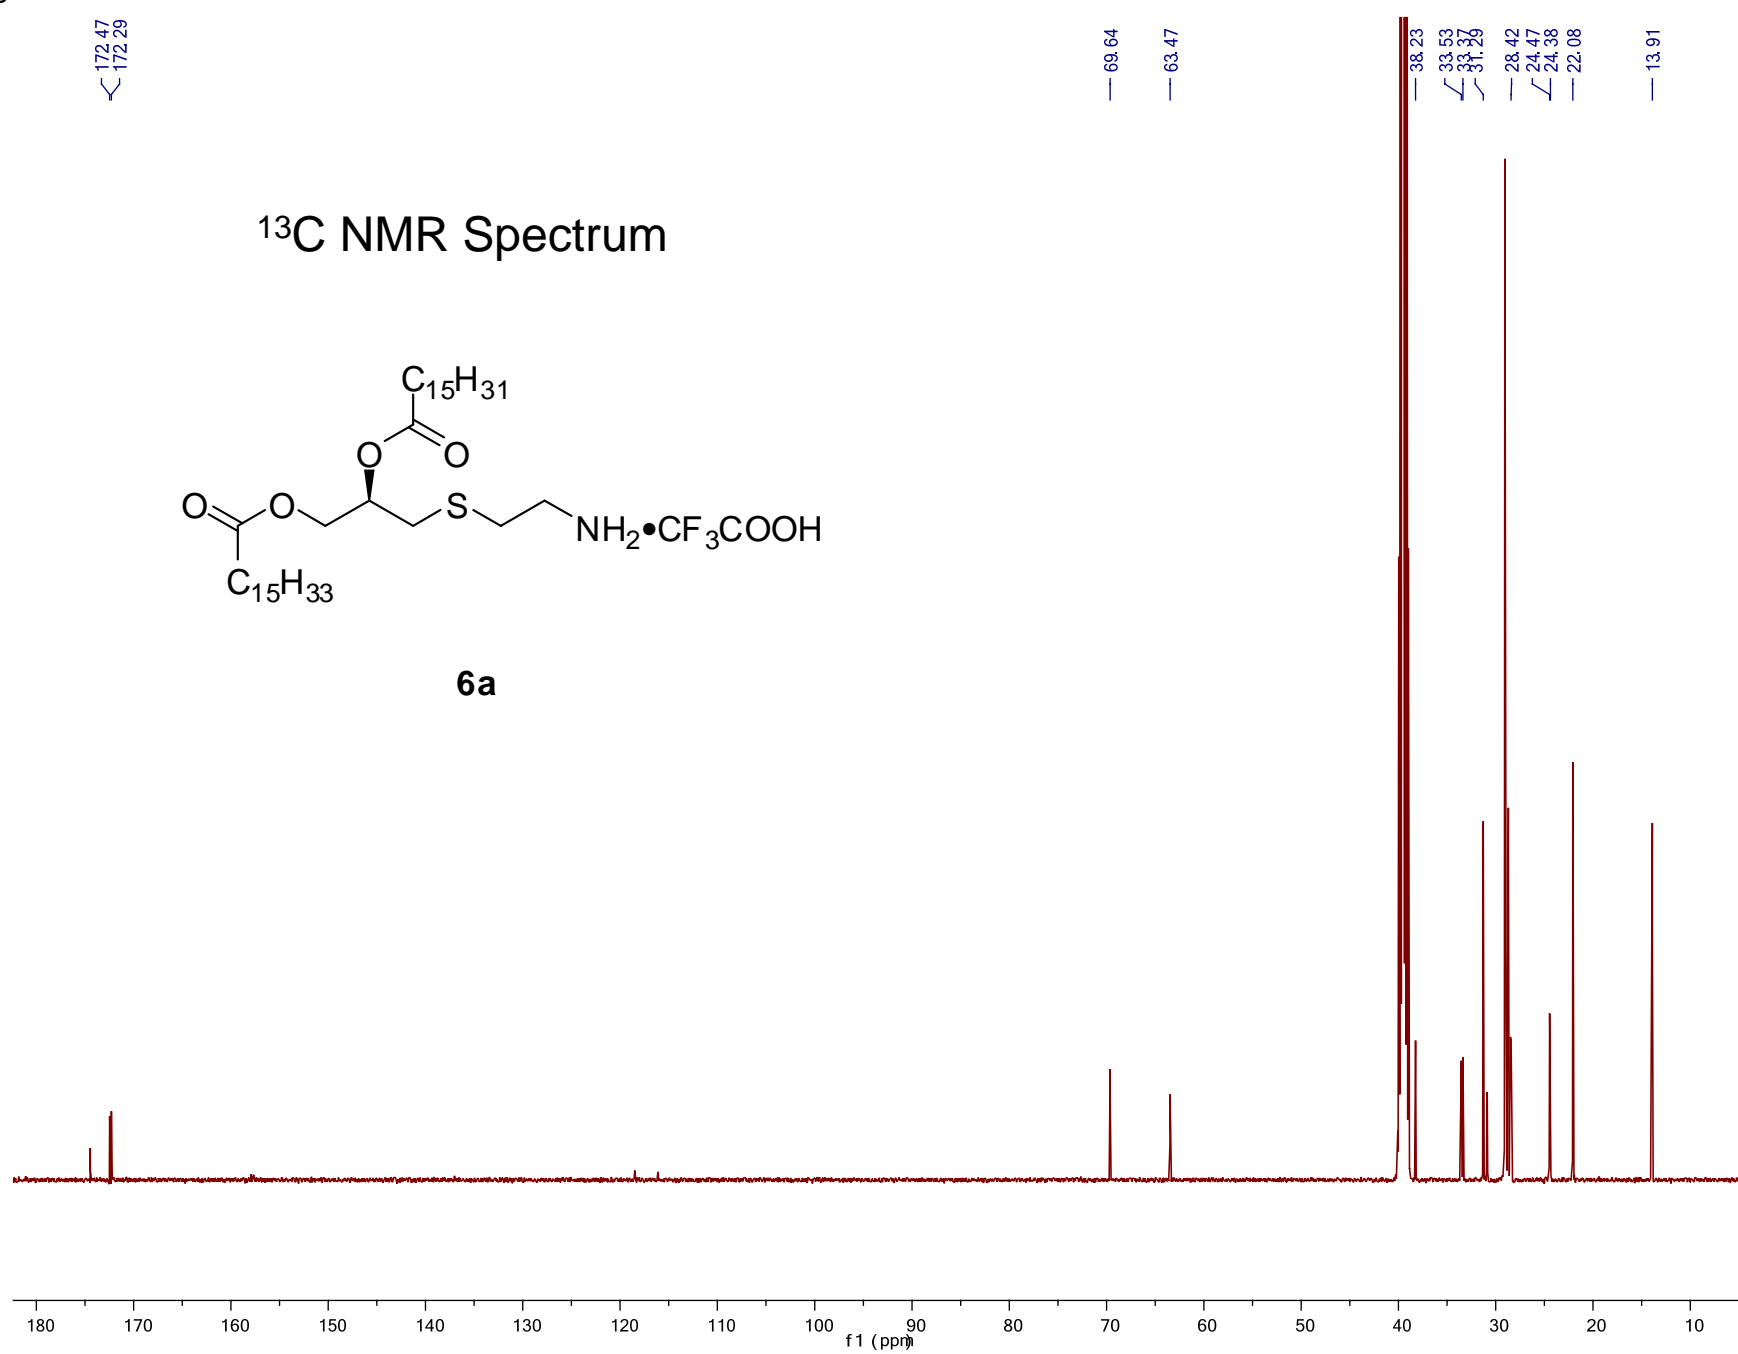



— 7.80

# <sup>1</sup>H NMR Spectrum

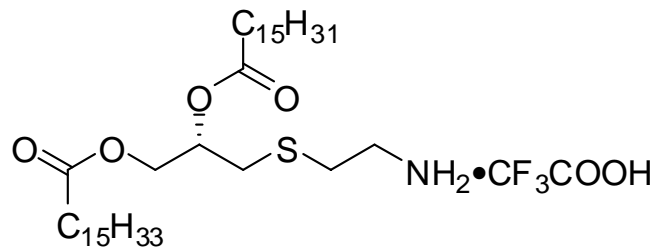

**6b**

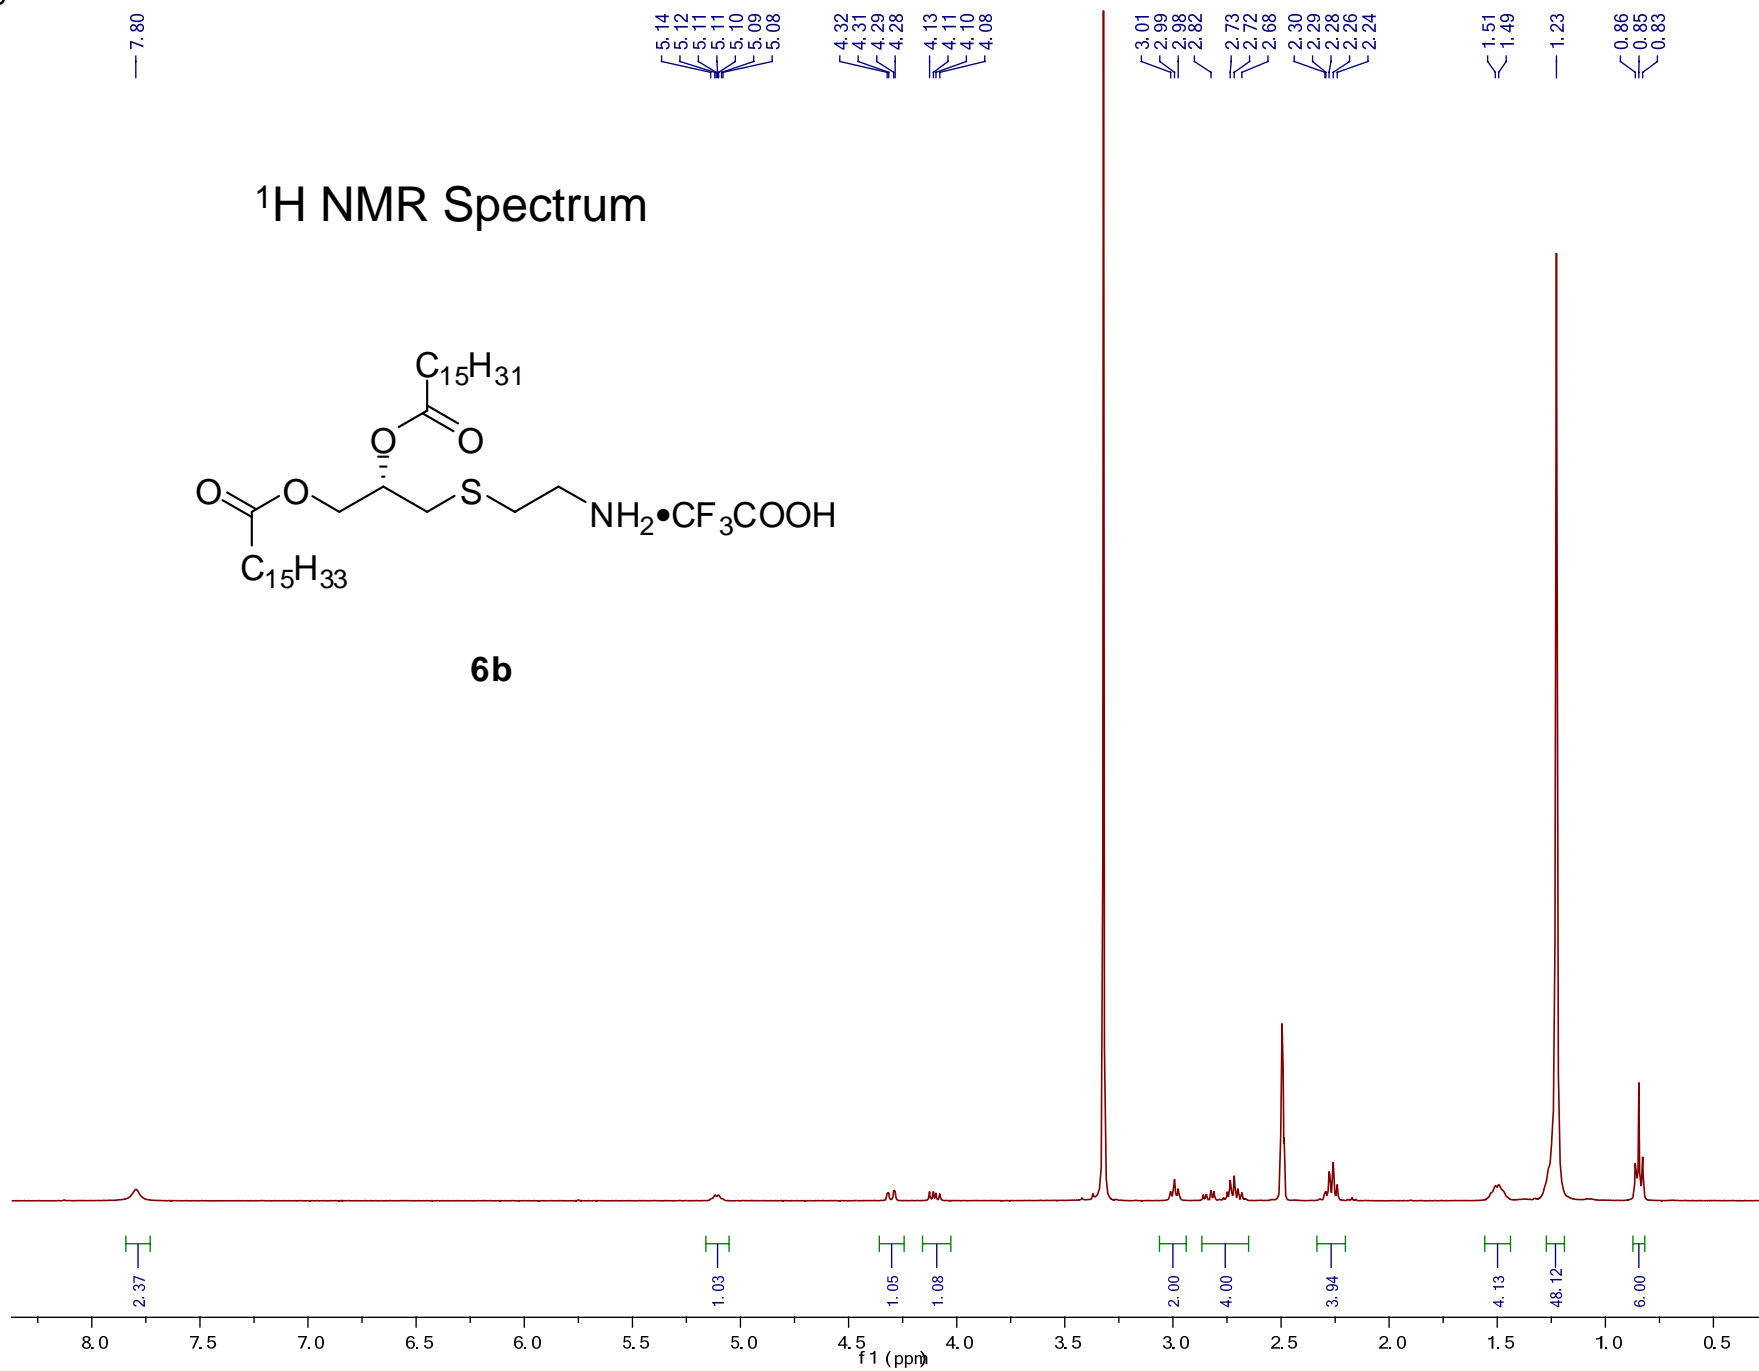

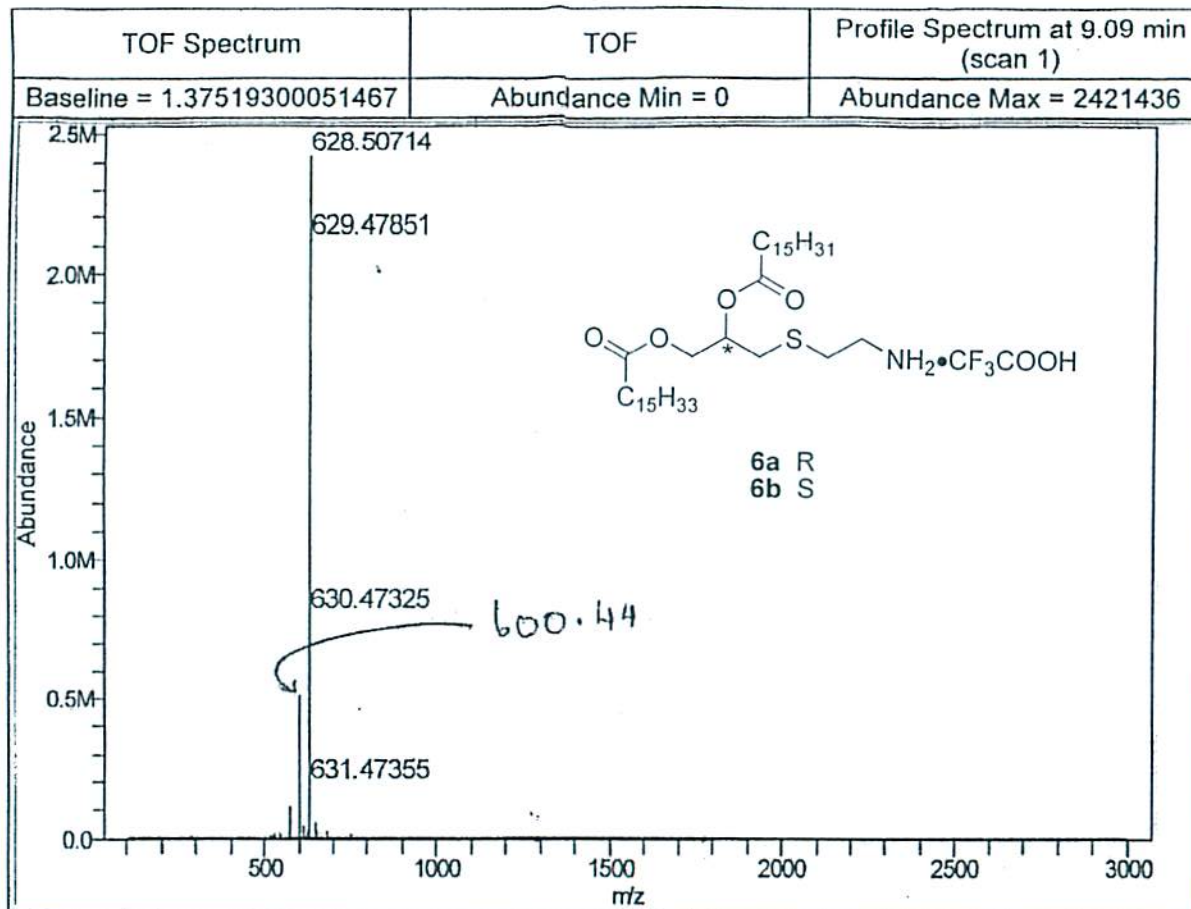

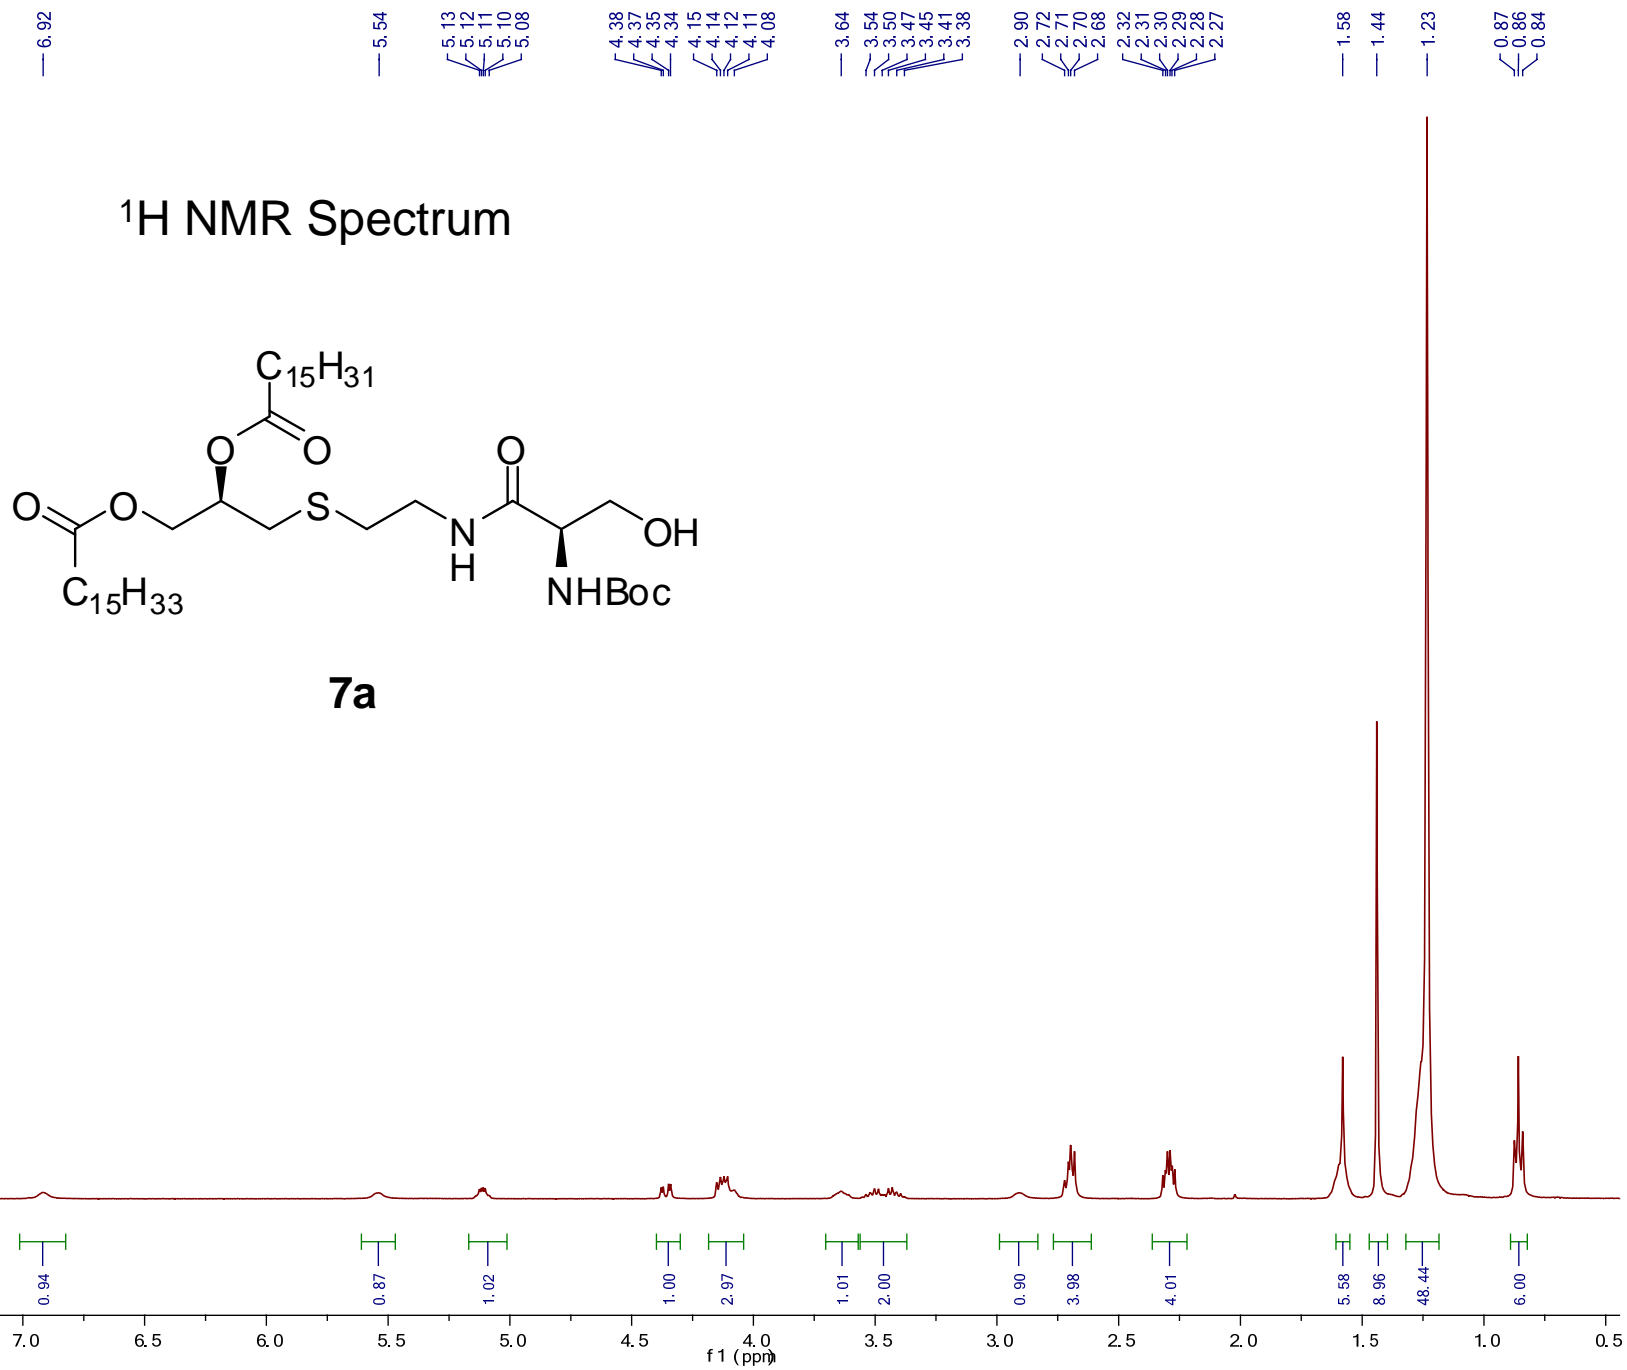

172.30  
172.13  
170.33

154.97  
154.95

79.32

69.11

62.38  
61.73

53.57

37.94

30.72

30.70

27.10

23.66

21.49

12.92

# $^{13}\text{C}$ NMR Spectrum

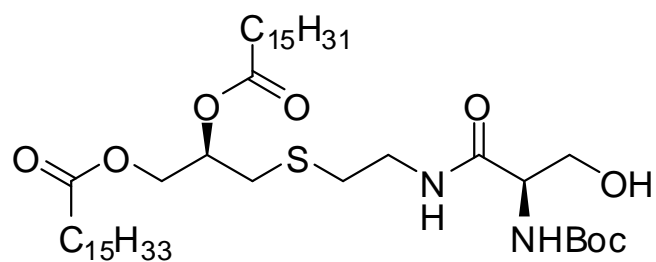

**7a**

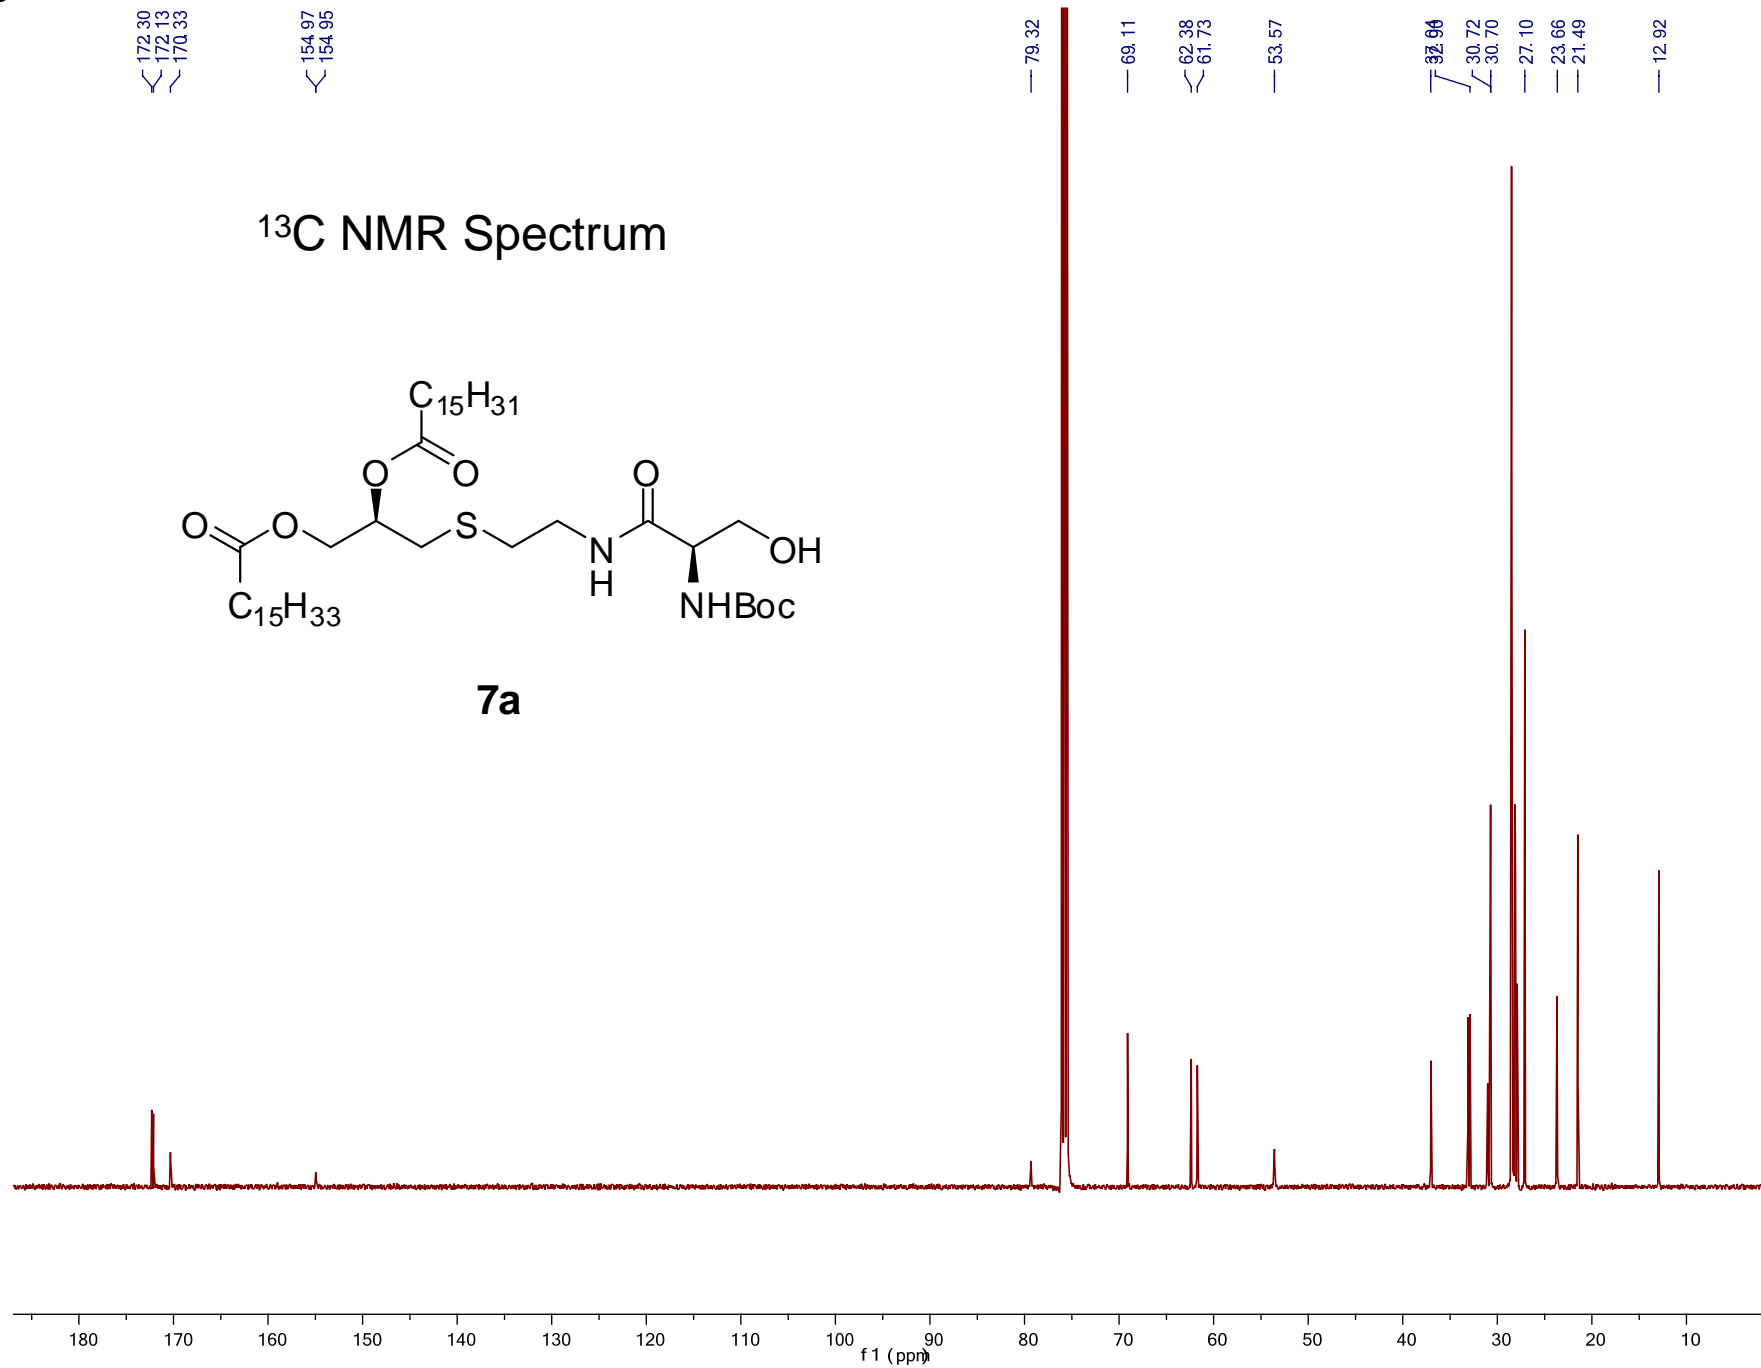

$^1\text{H}$  NMR Spectrum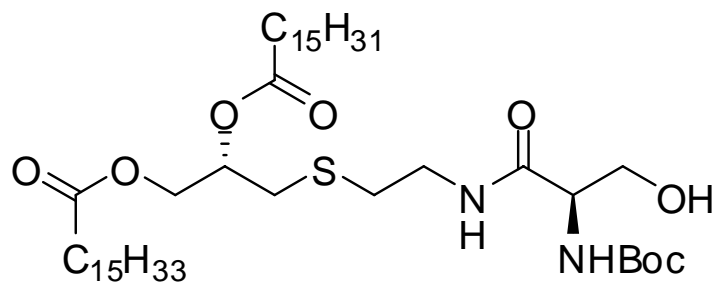**7b**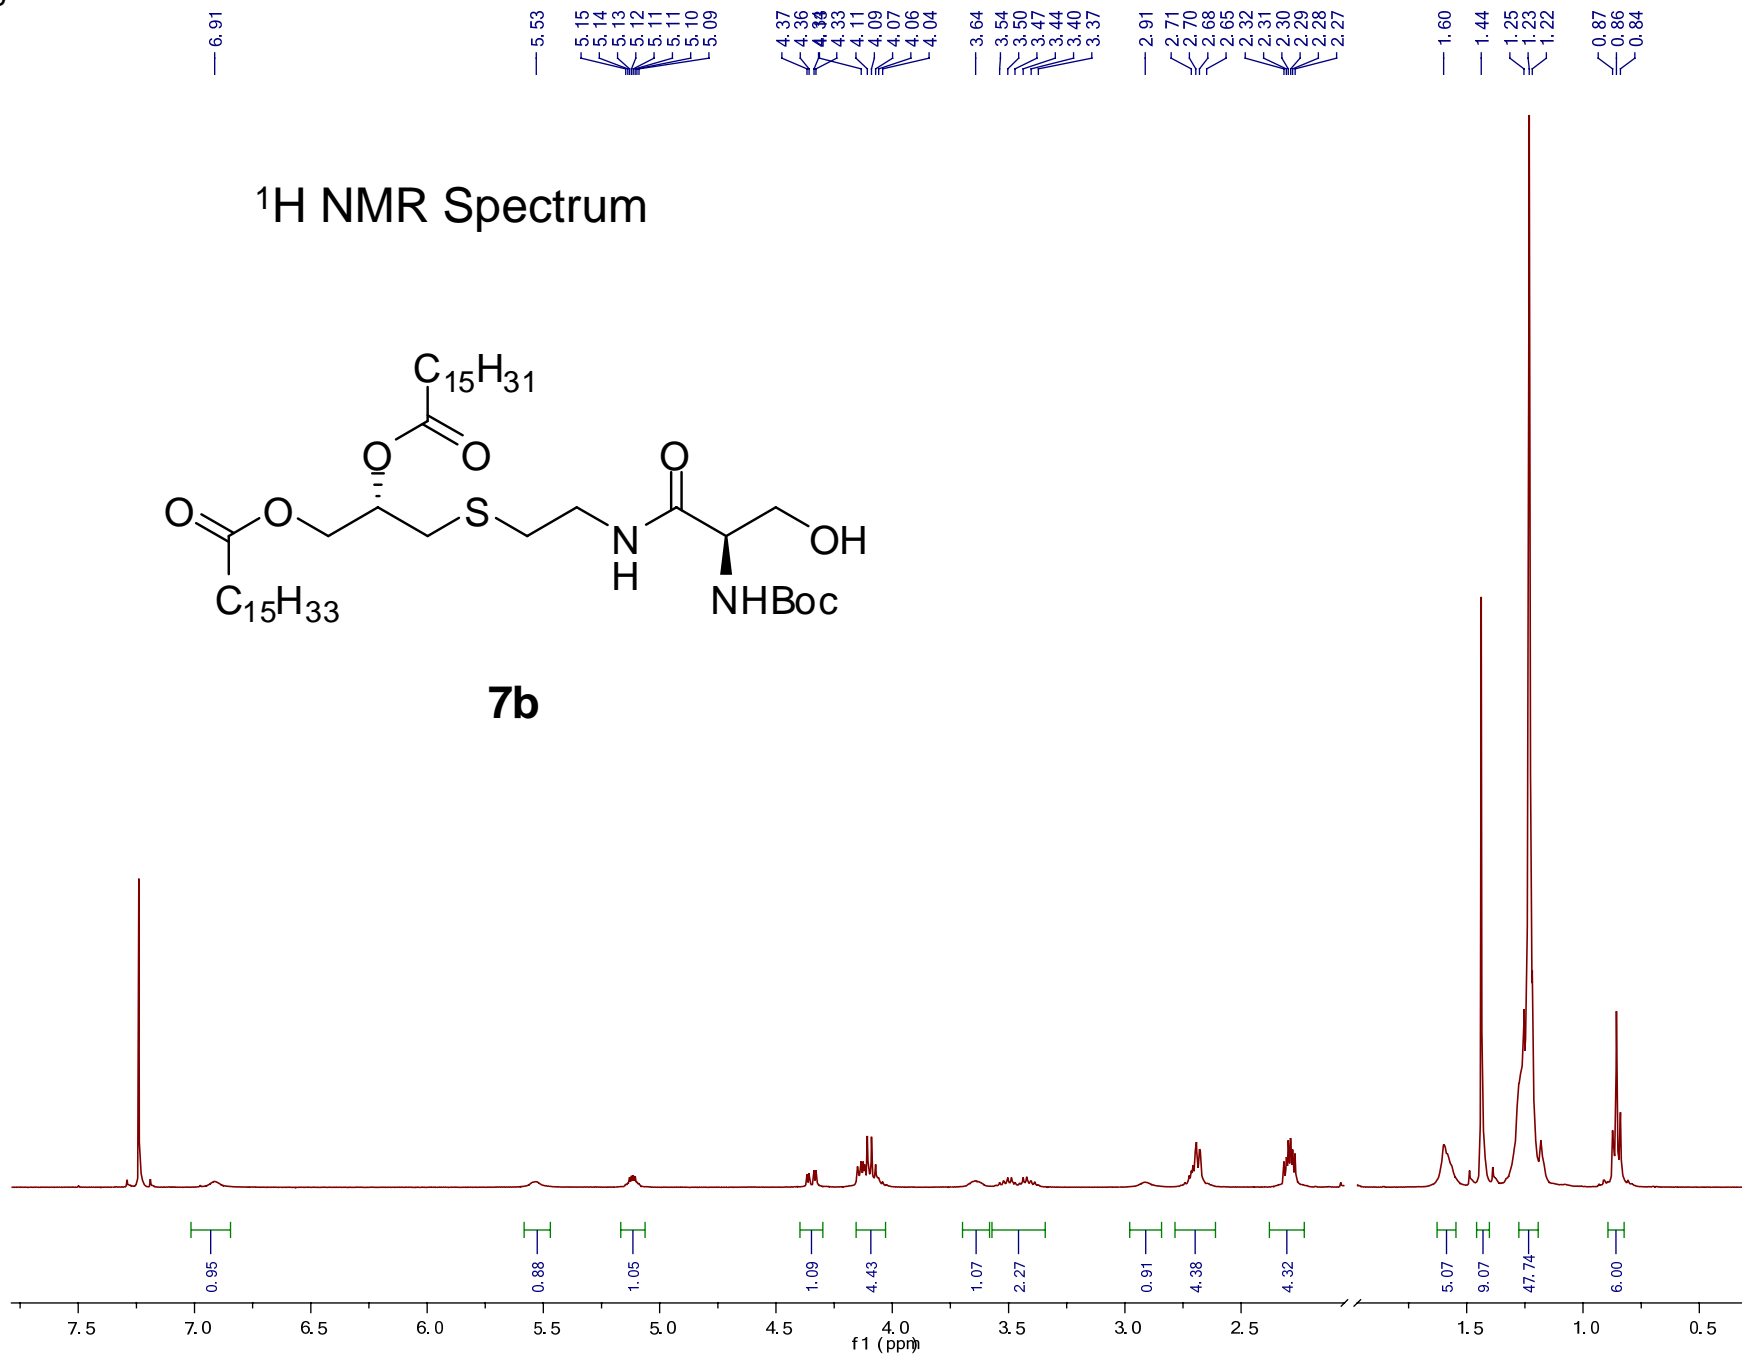

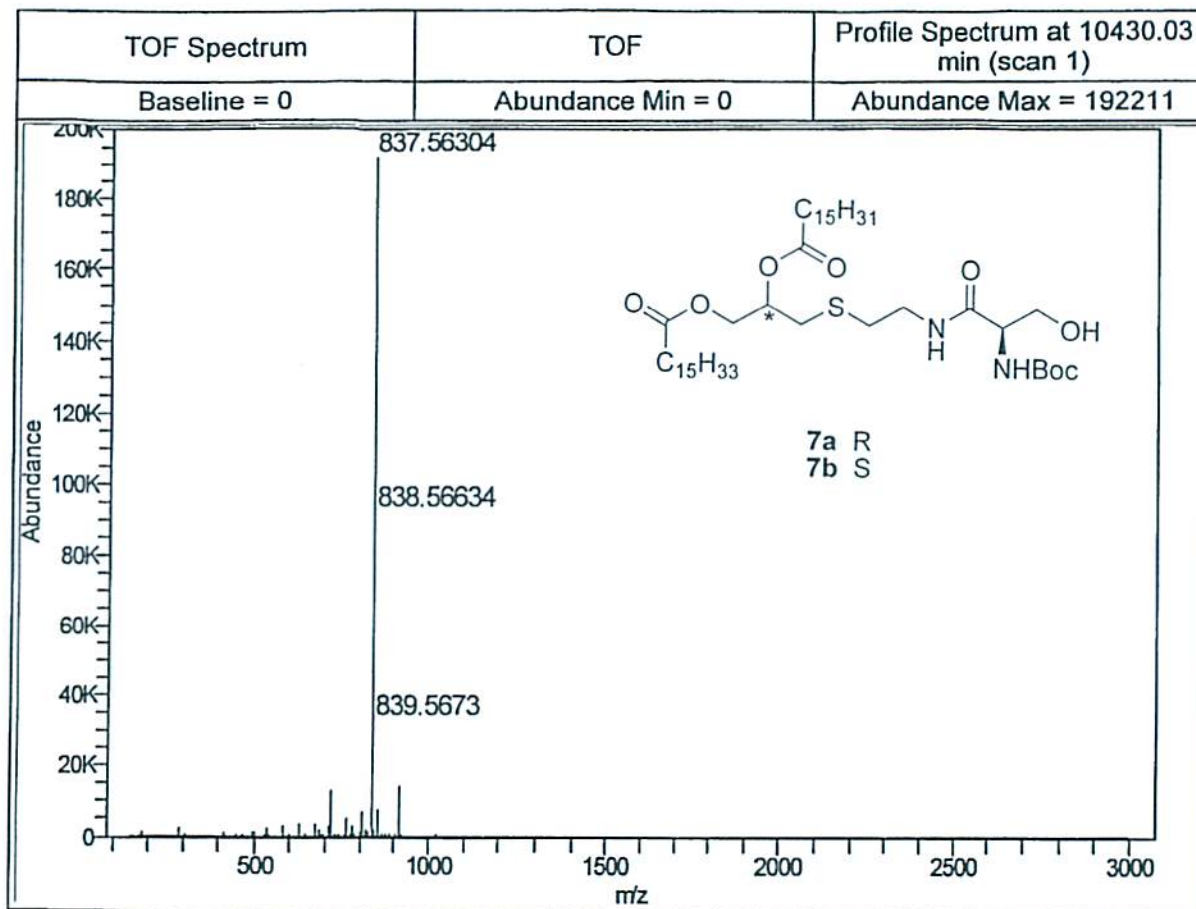

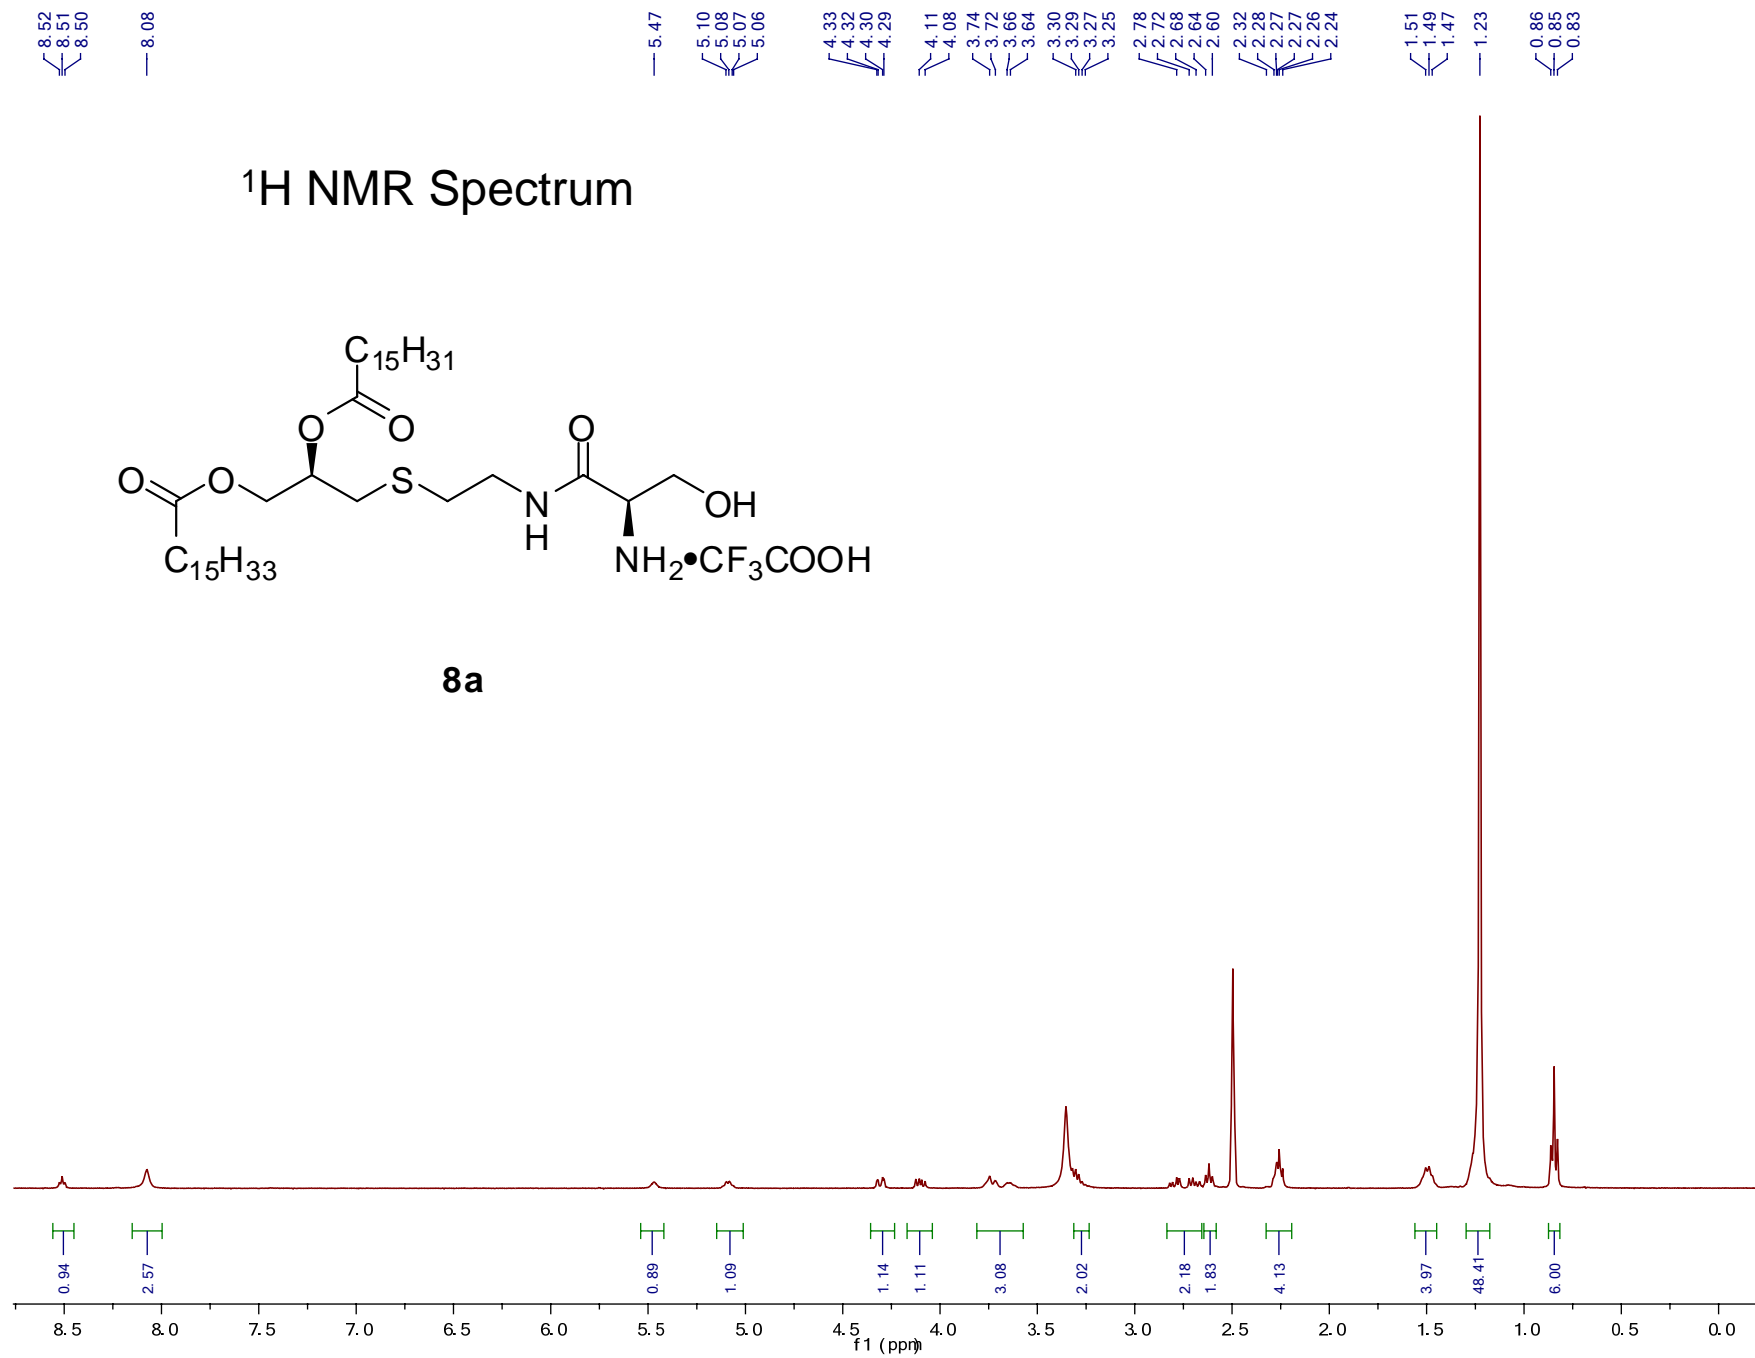

172.50  
172.27  
166.69

69.88  
63.45  
60.27  
54.35  
38.52  
33.55  
33.37  
31.28  
28.41  
24.47  
24.39  
22.08  
13.92

### <sup>13</sup>C NMR Spectrum

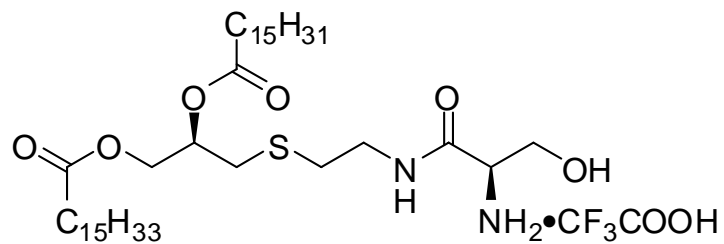

**8a**

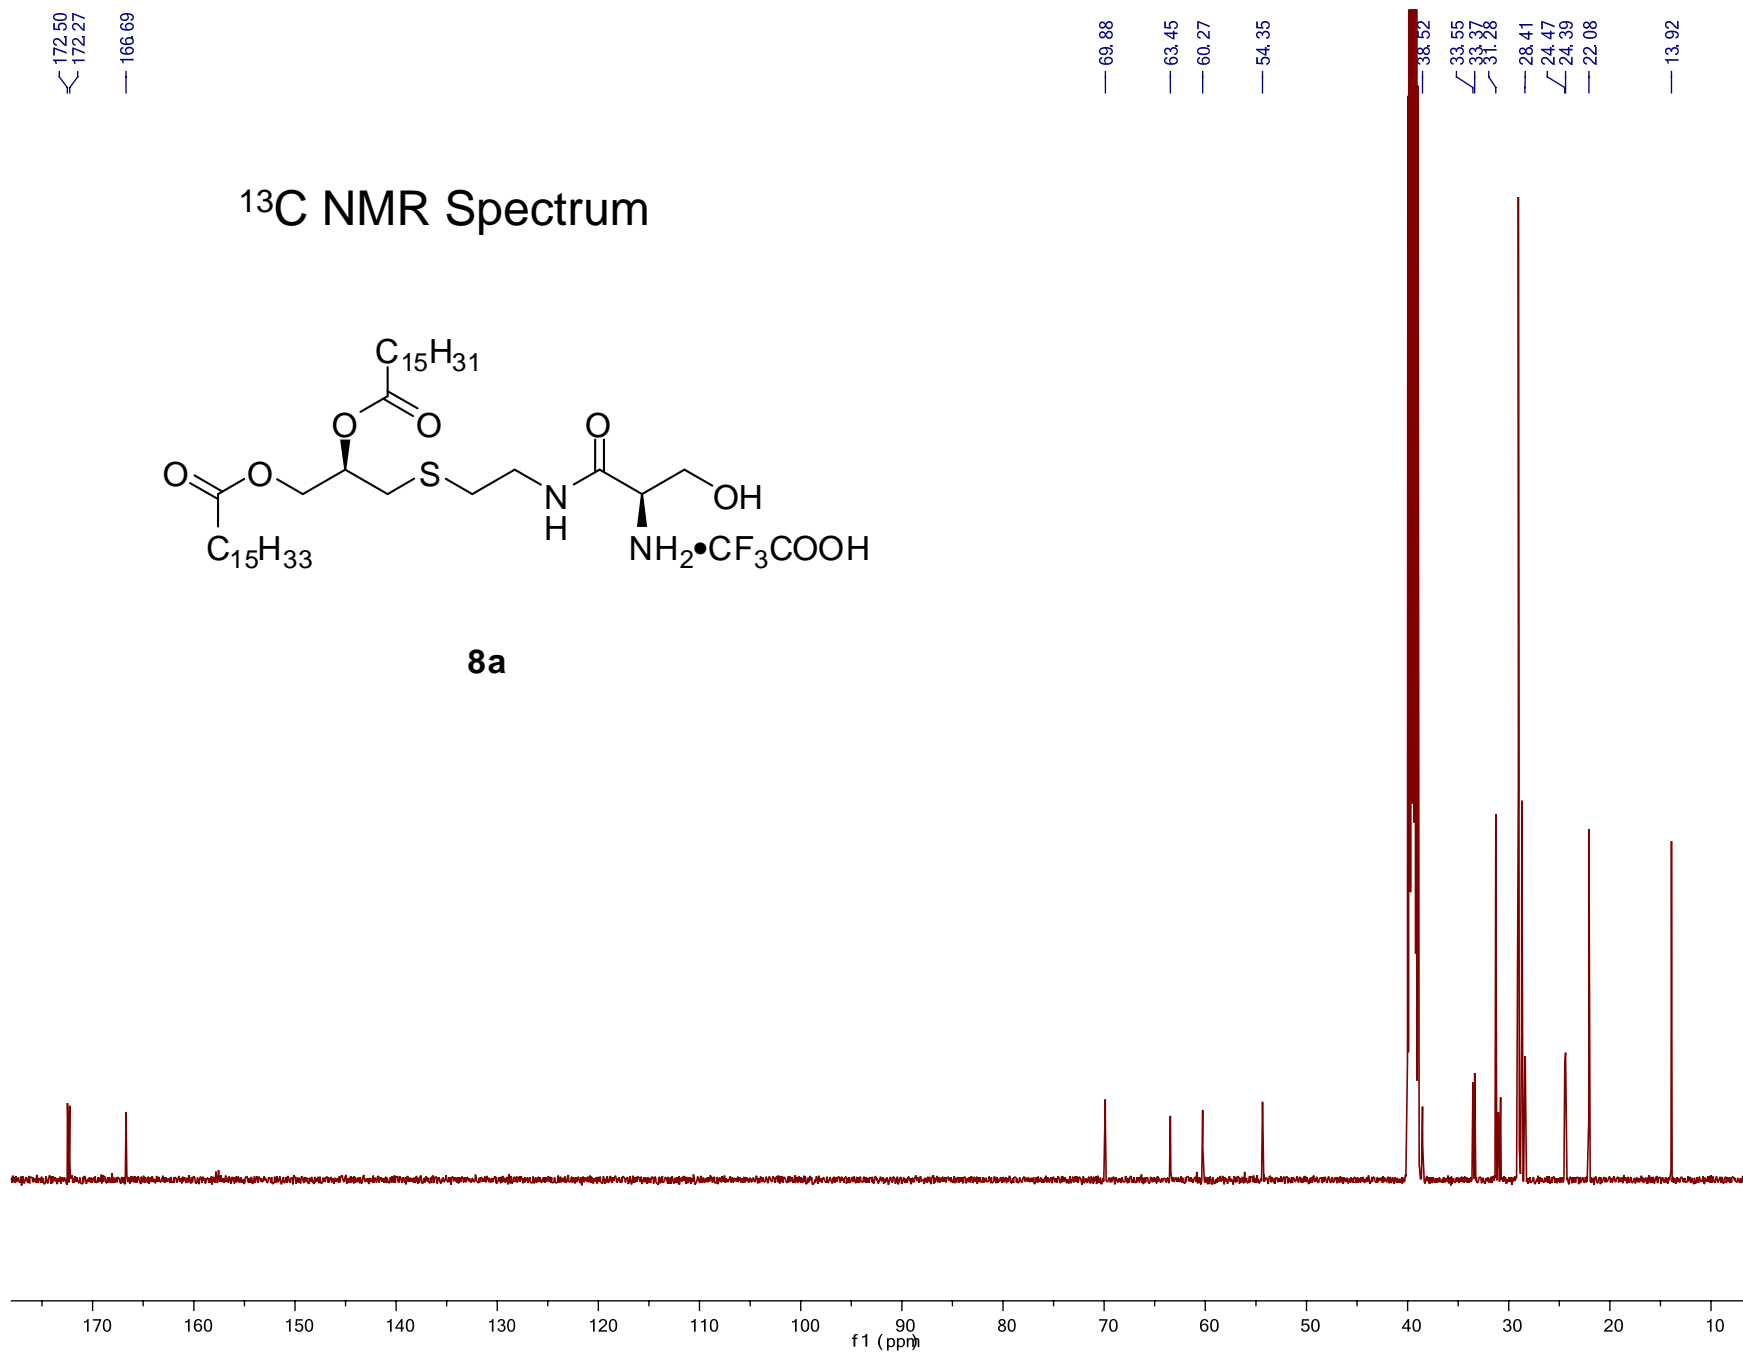



8.53  
8.51  
8.50

— 8.08

— 5.48

5.10  
5.084.32  
4.32  
4.29  
4.29

— 4.07

3.75

3.65

3.63

3.62

3.33

3.31

3.30

3.28

2.79

2.71

2.68

2.64

2.61

2.58

2.28

2.27

2.26

2.24

1.51

1.49

— 1.23

0.86

0.84

0.83

# <sup>1</sup>H NMR Spectrum

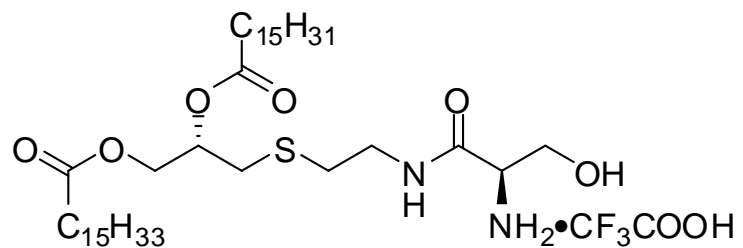**8b**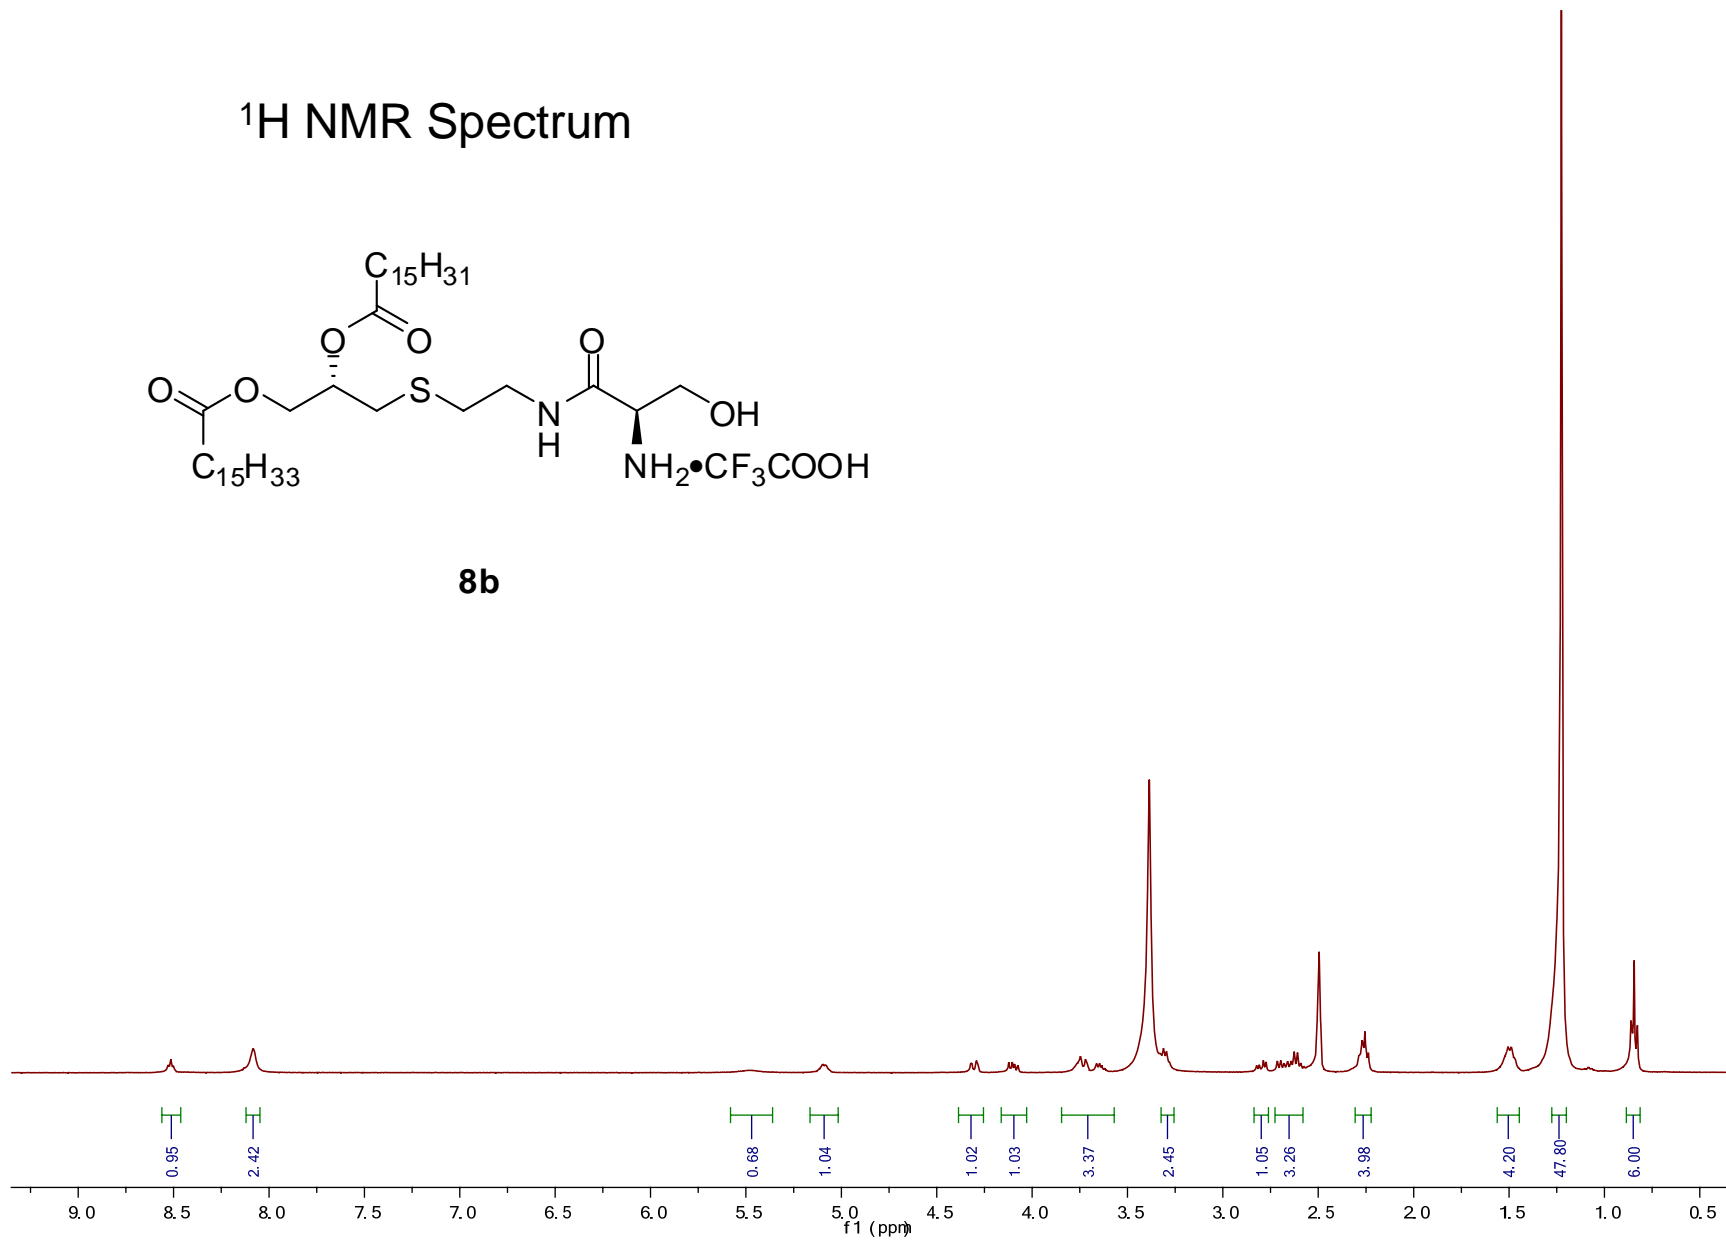

172.85  
172.83  
167.10

70.25

63.84

60.65

54.71

38.92

33.92

33.75

31.66

28.80

24.85

24.76

22.46

14.28

# <sup>13</sup>C NMR Spectrum

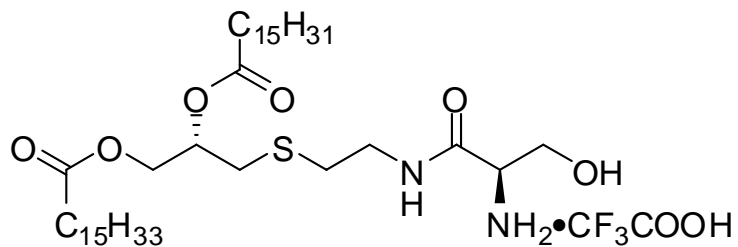

**8b**

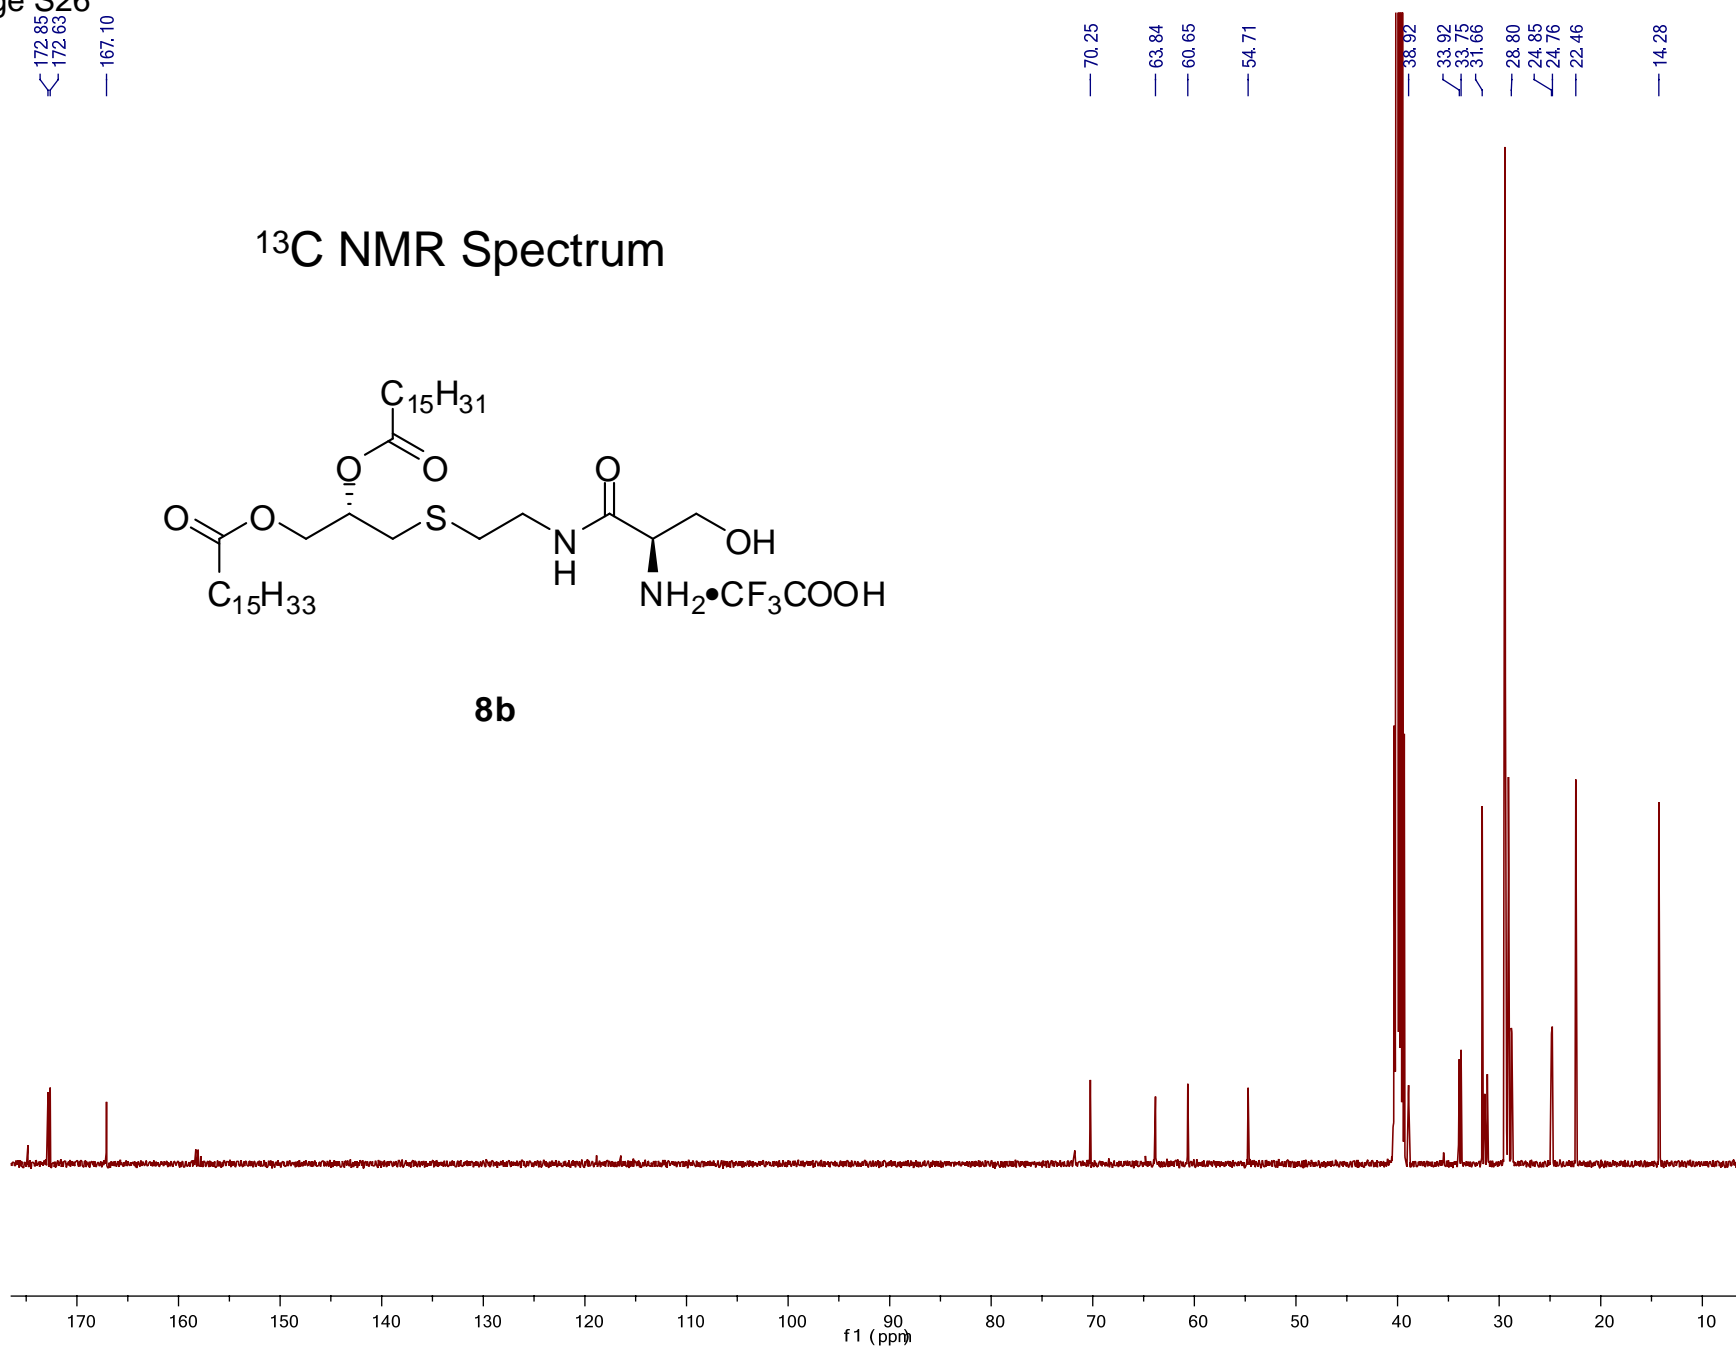

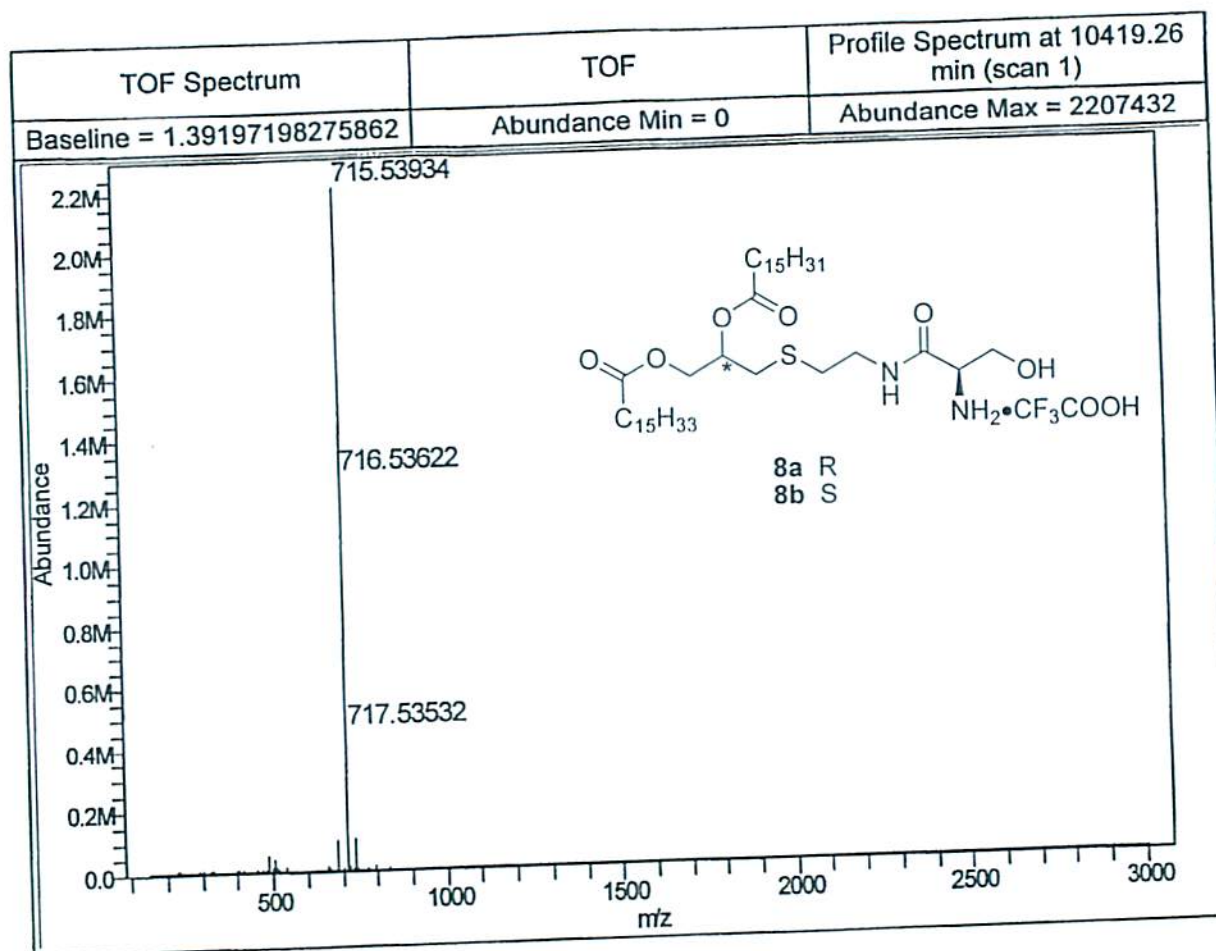

$^1\text{H}$  NMR Spectrum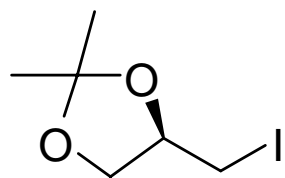**9a**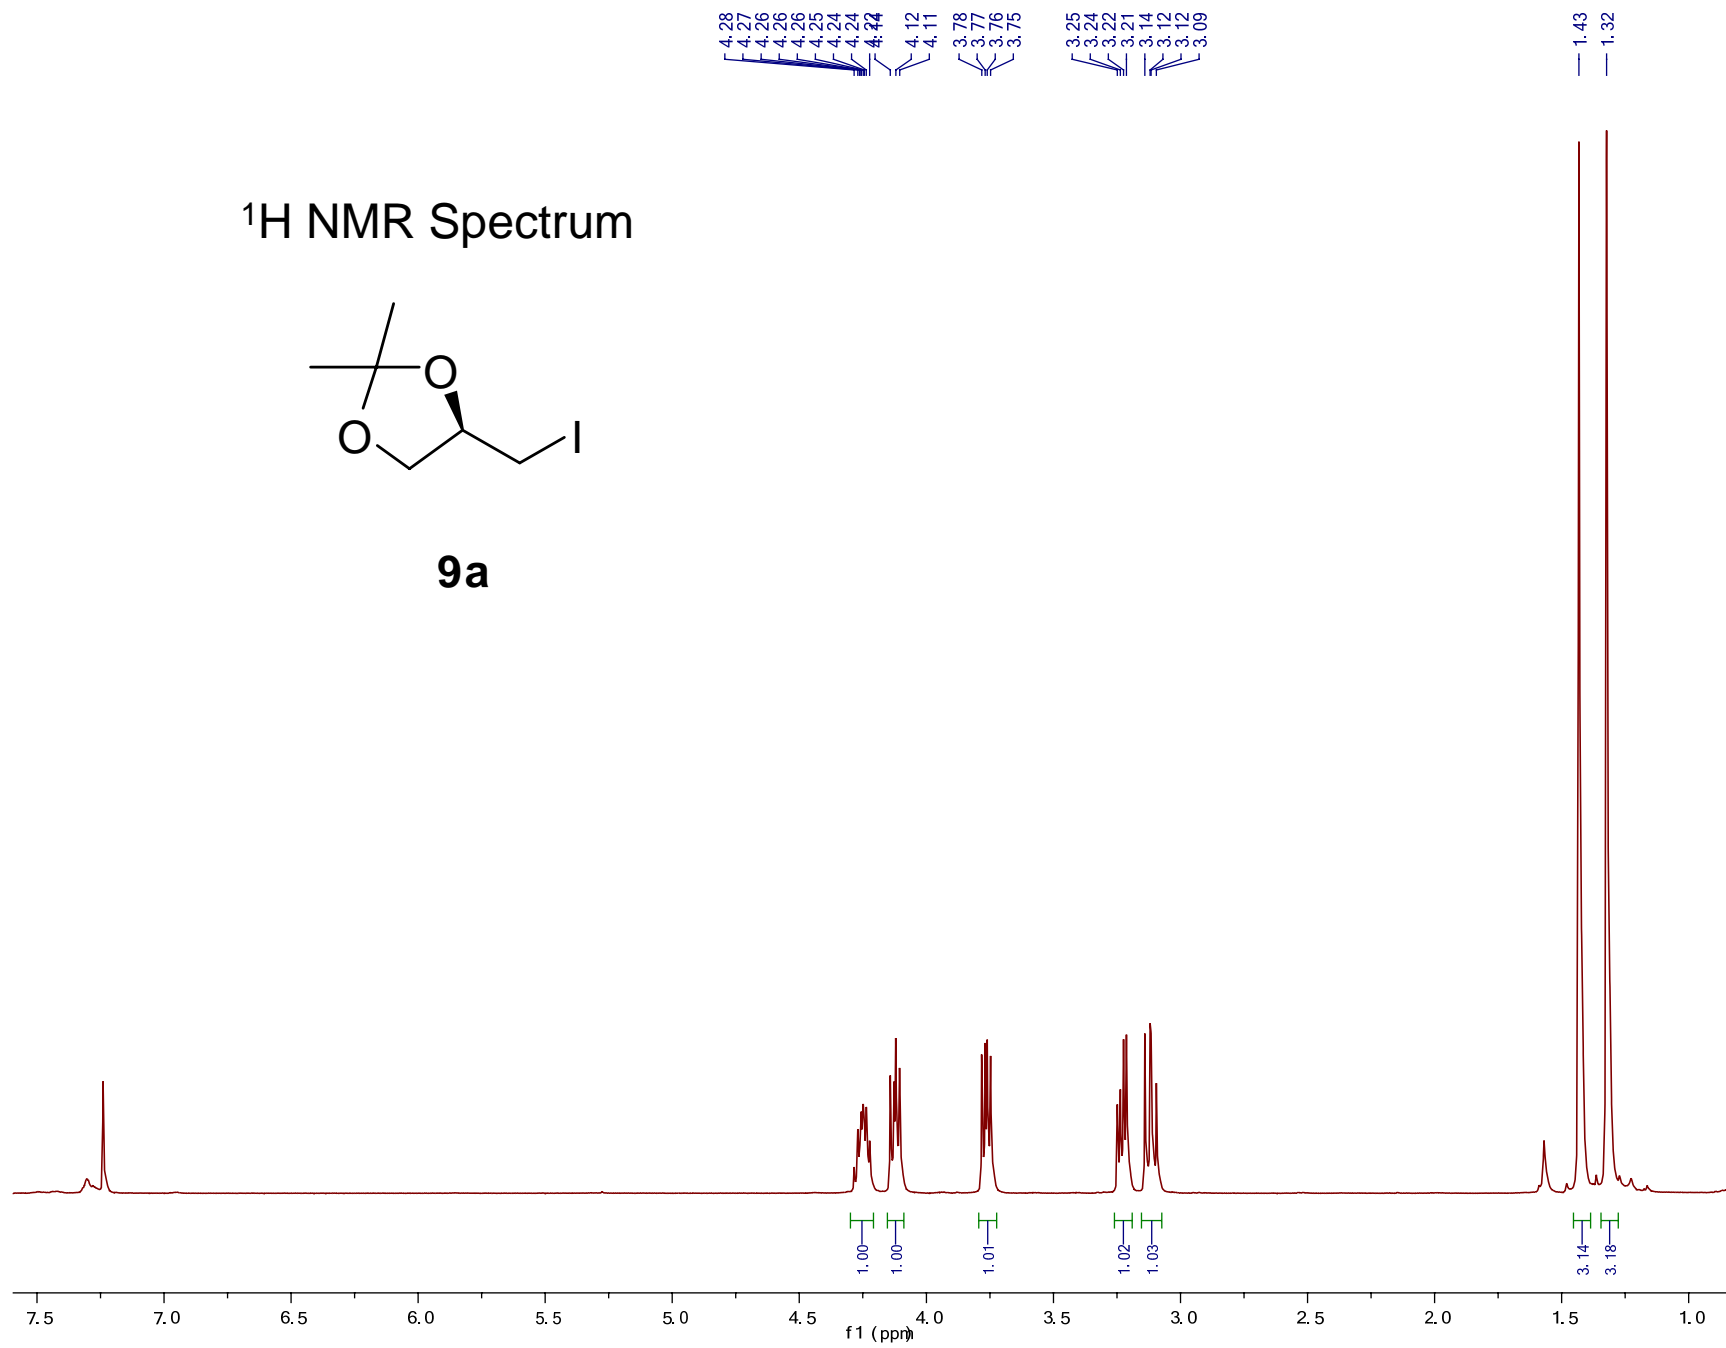

$^{13}\text{C}$  NMR Spectrum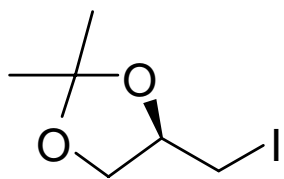**9a**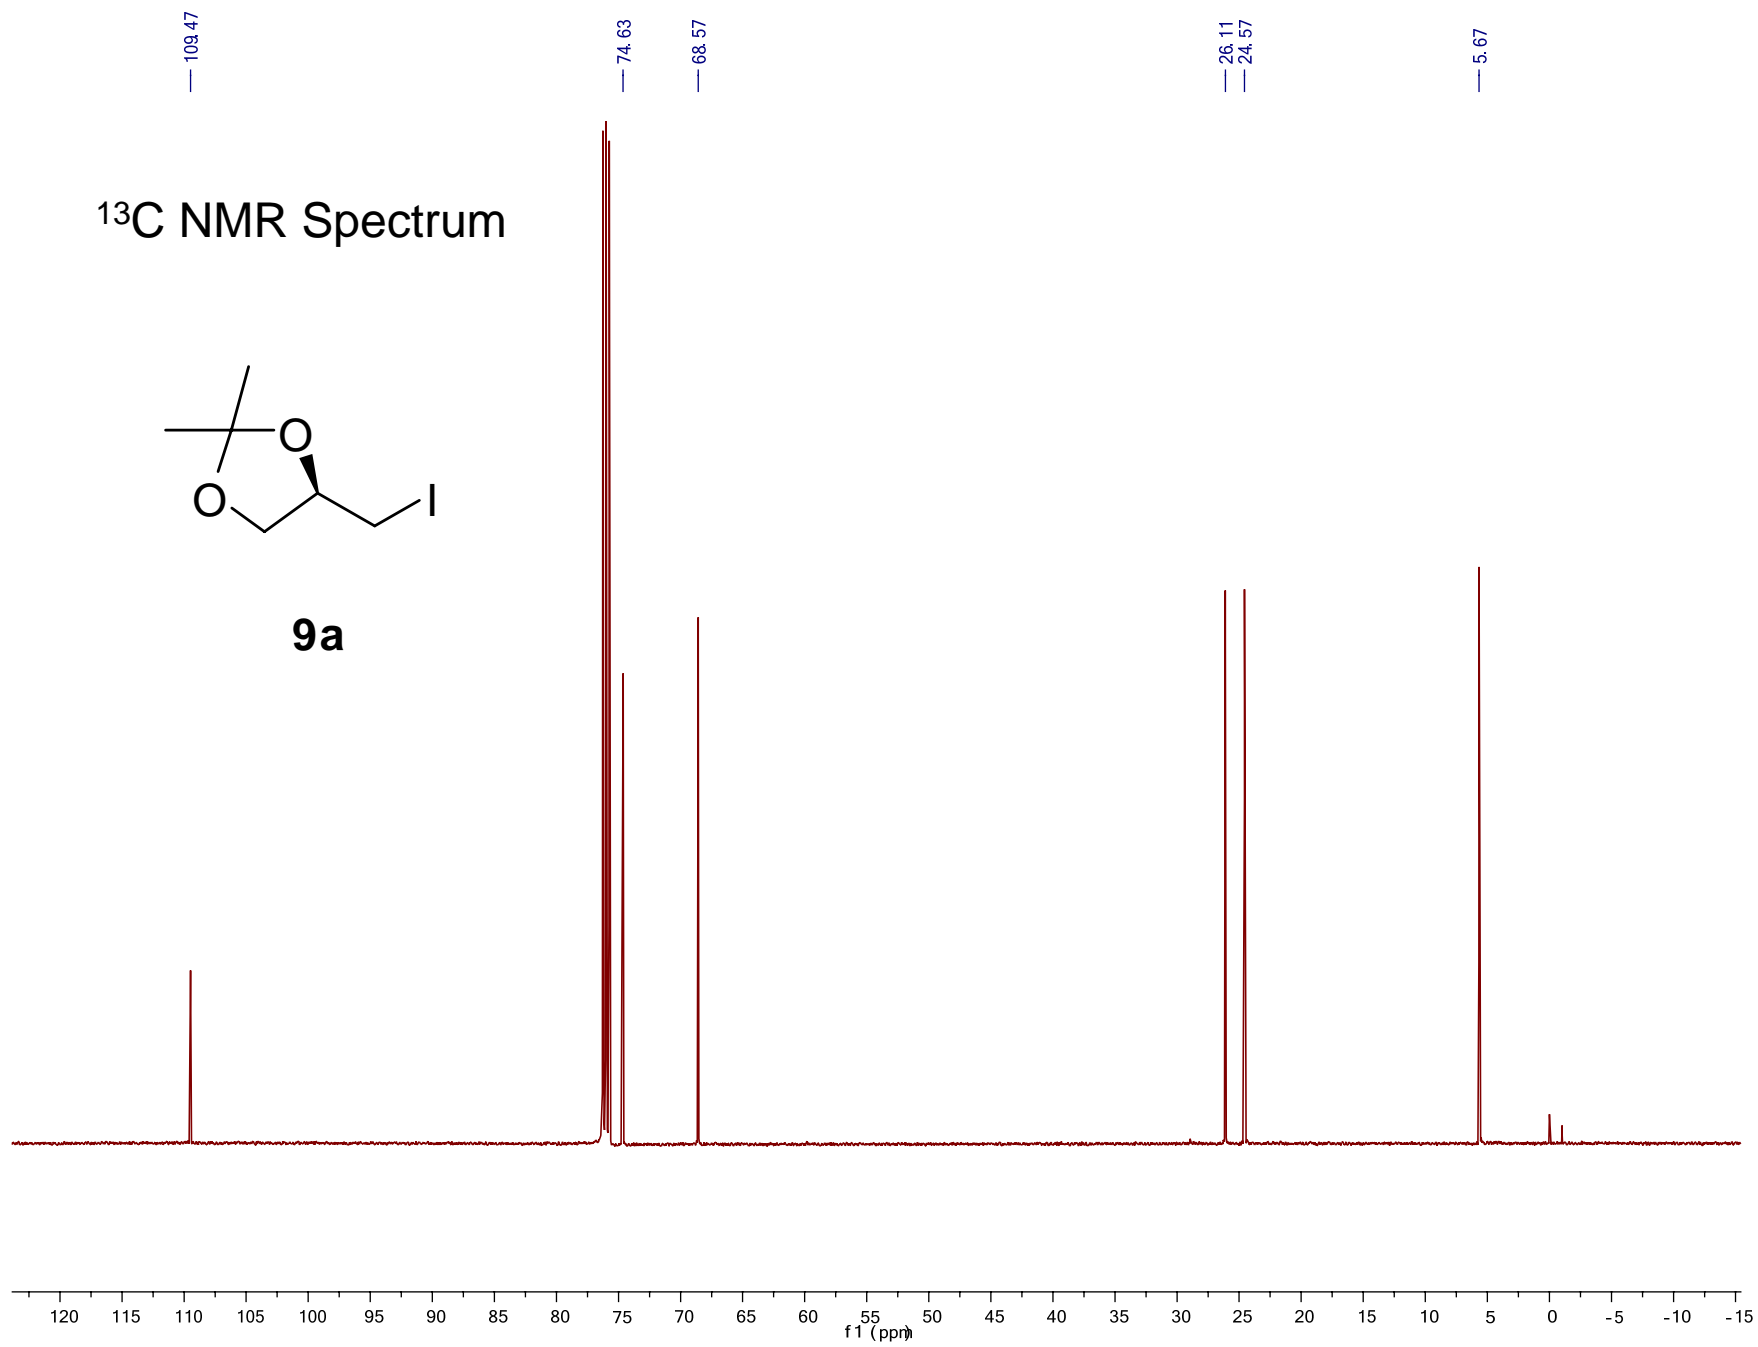

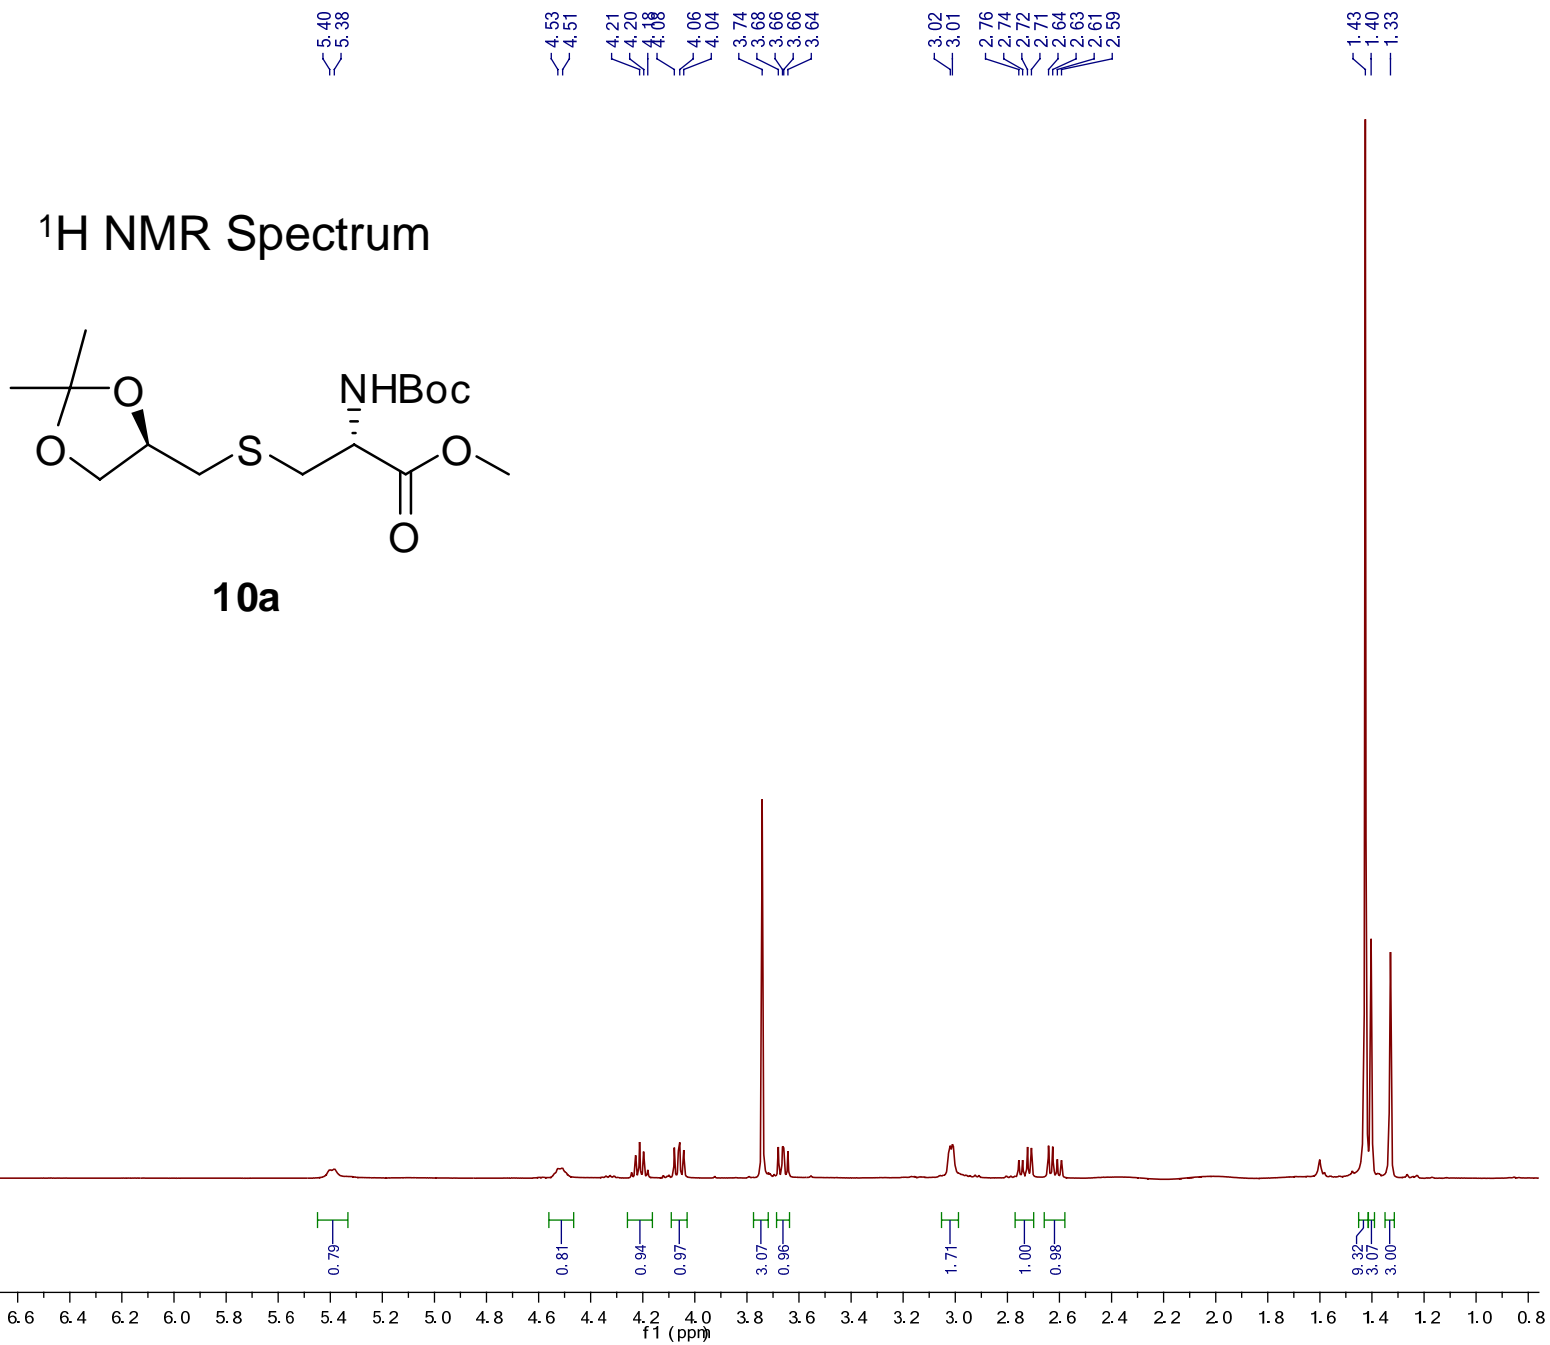

<sup>13</sup>C NMR Spectrum

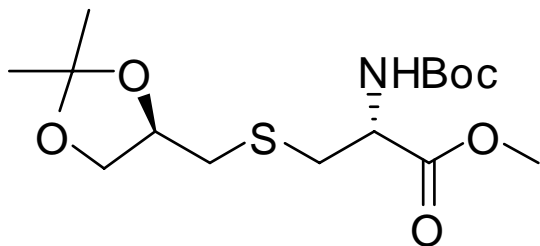

**10a**

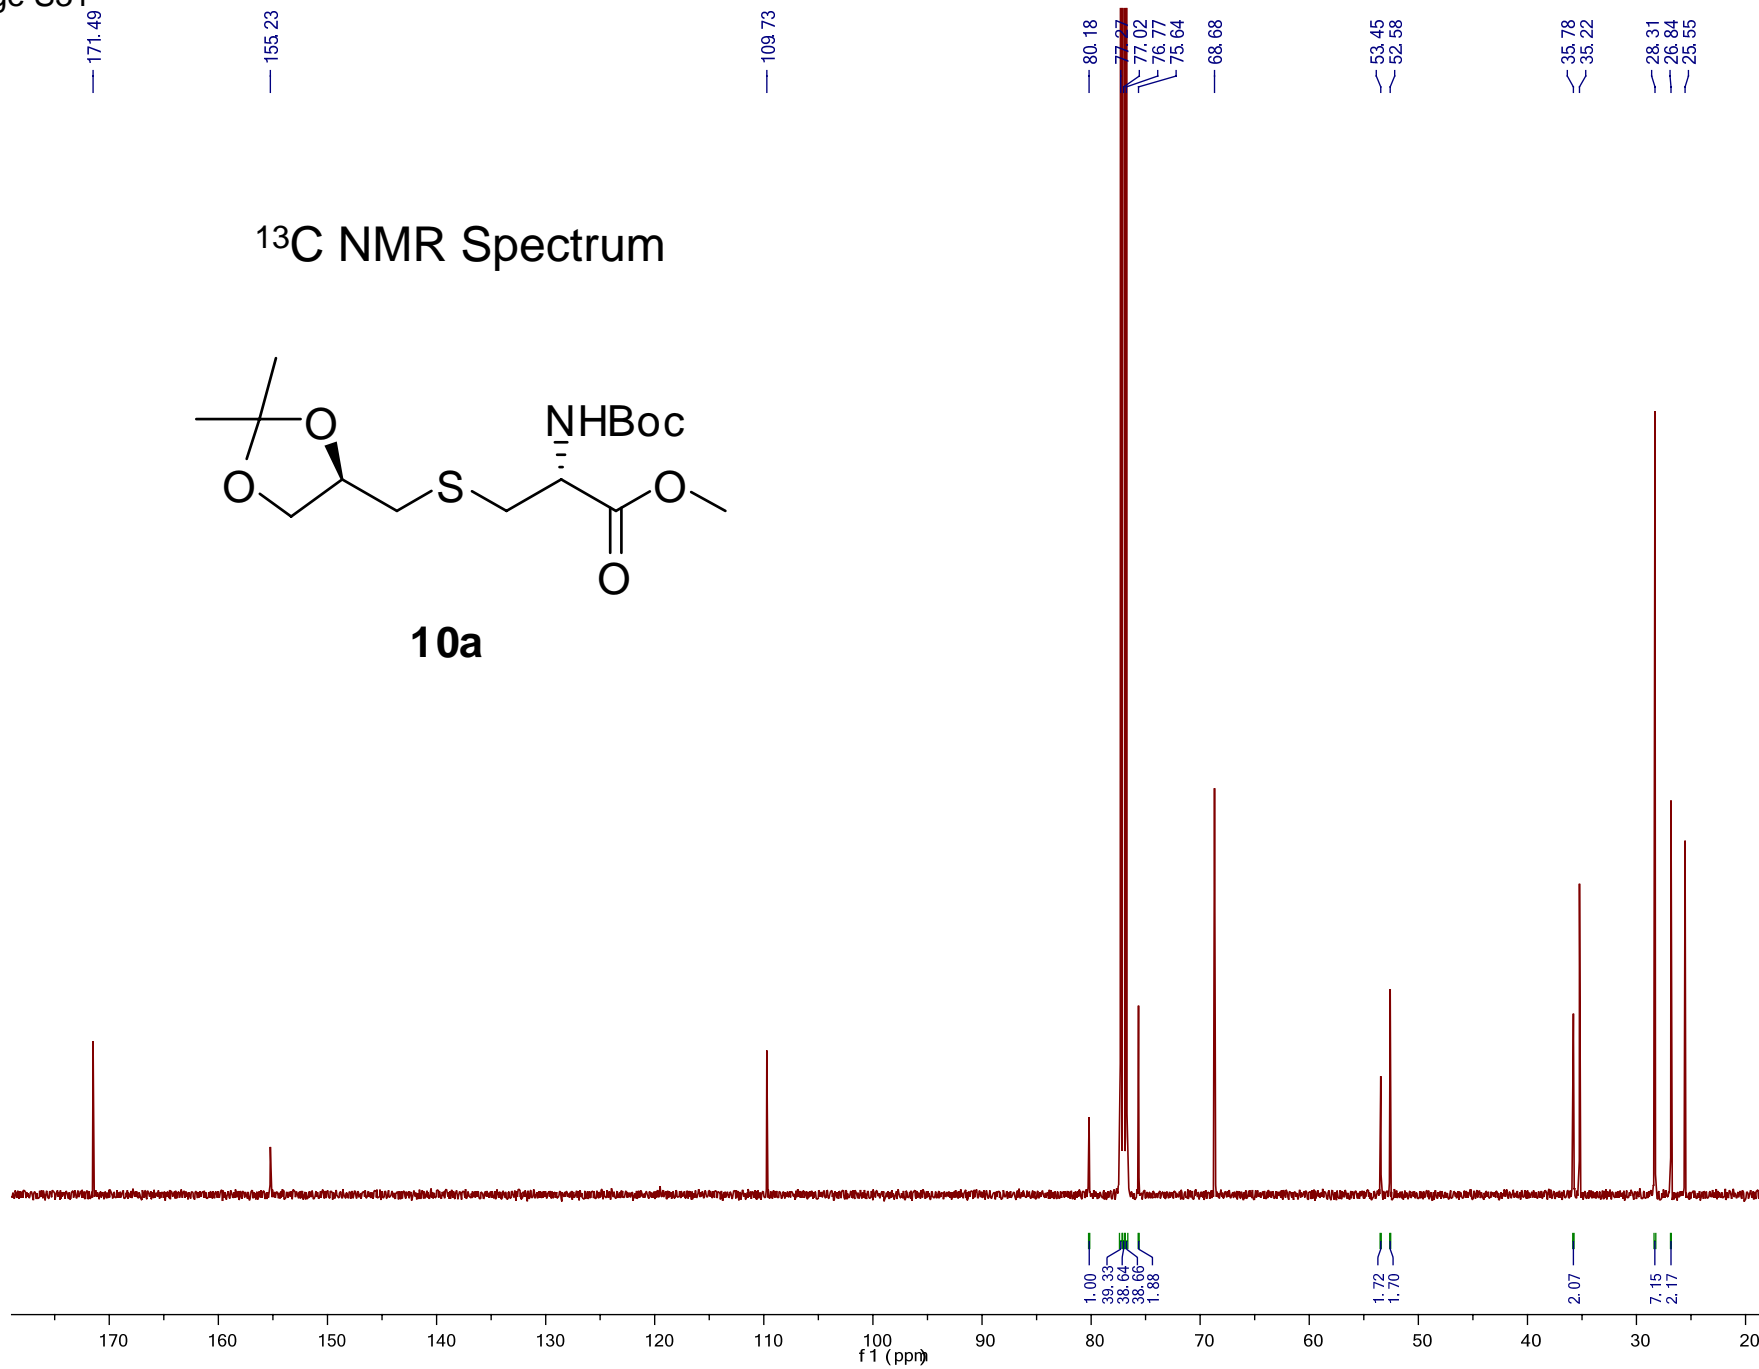

$^1\text{H}$  NMR Spectrum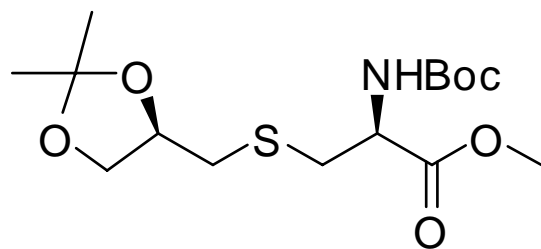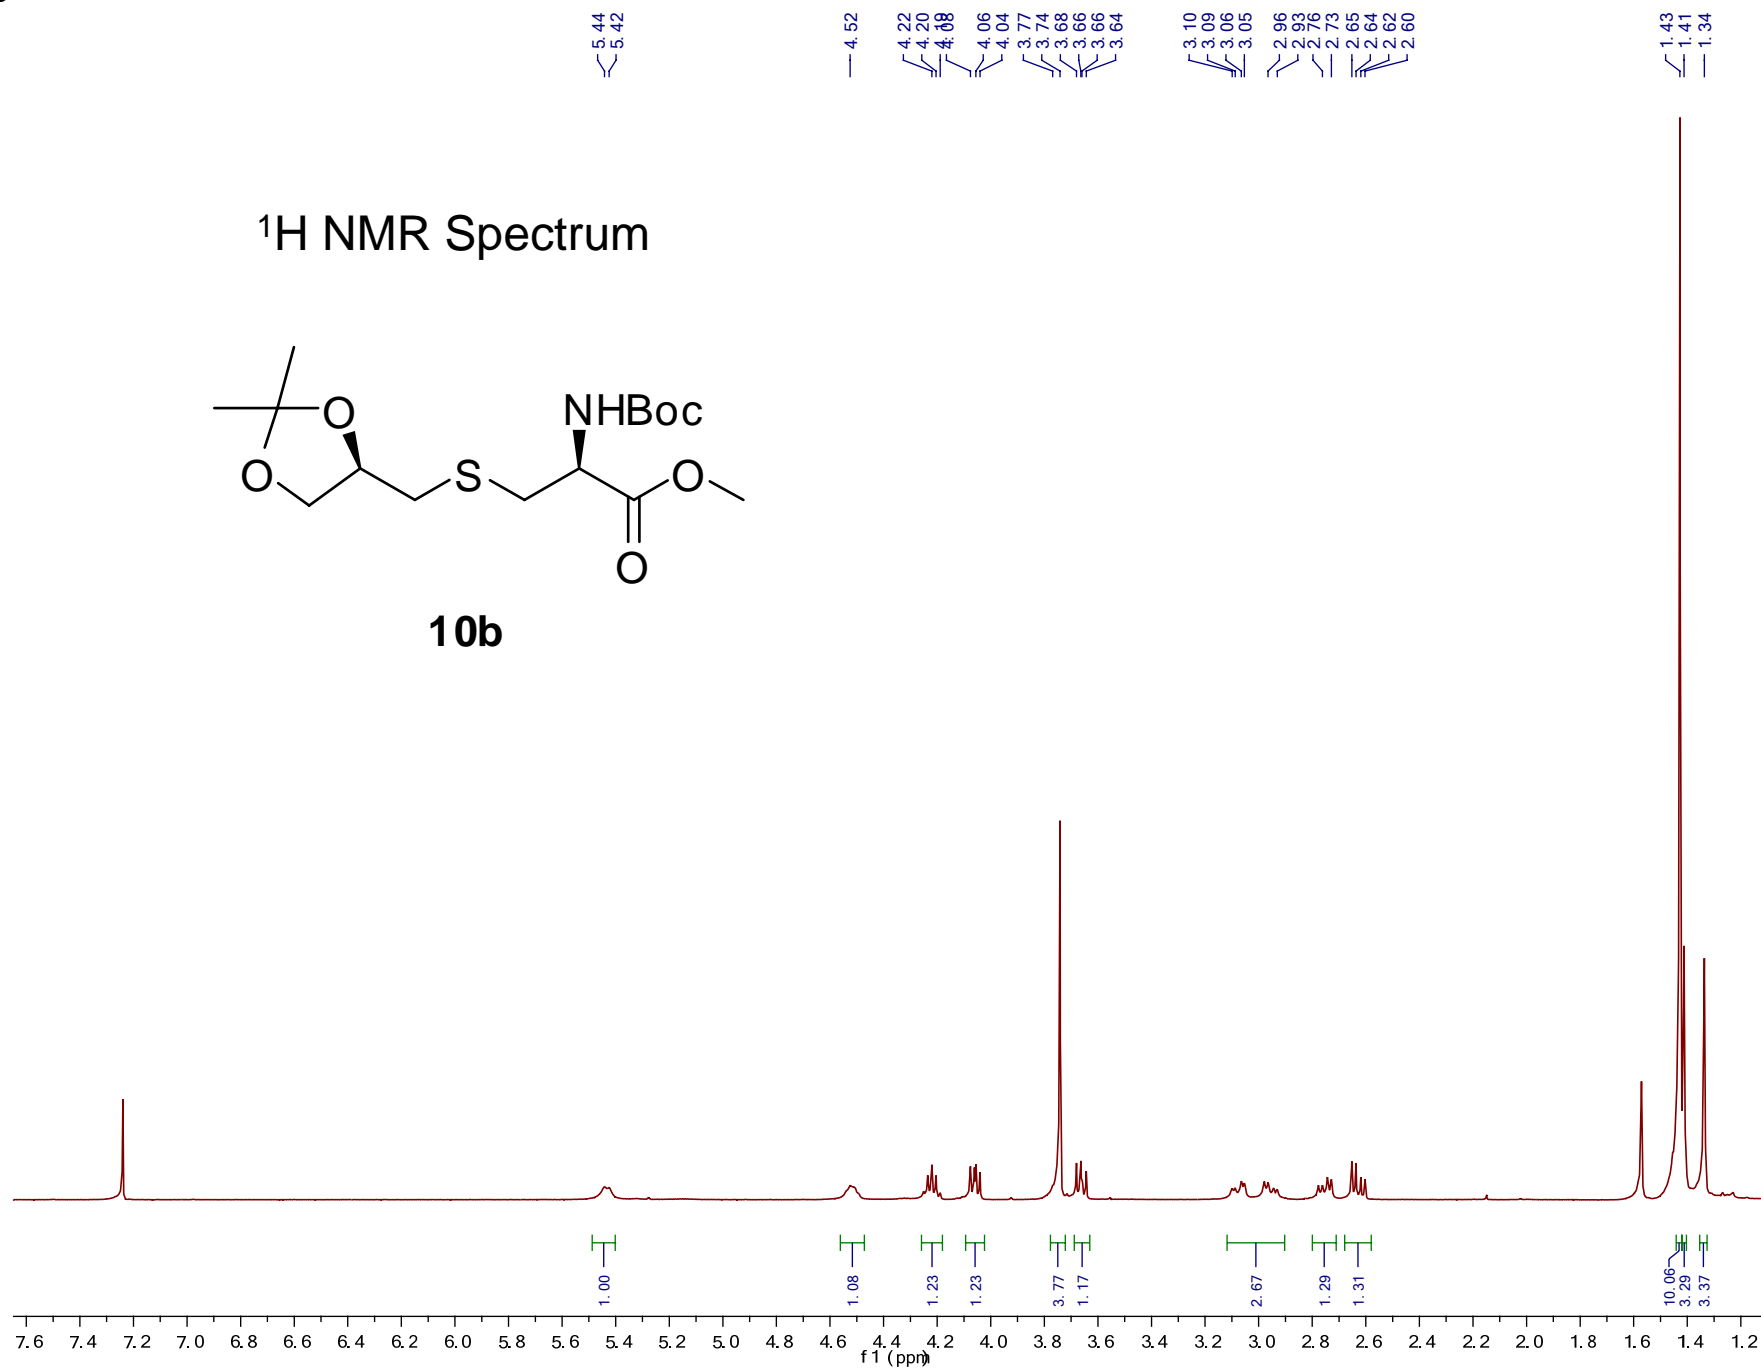



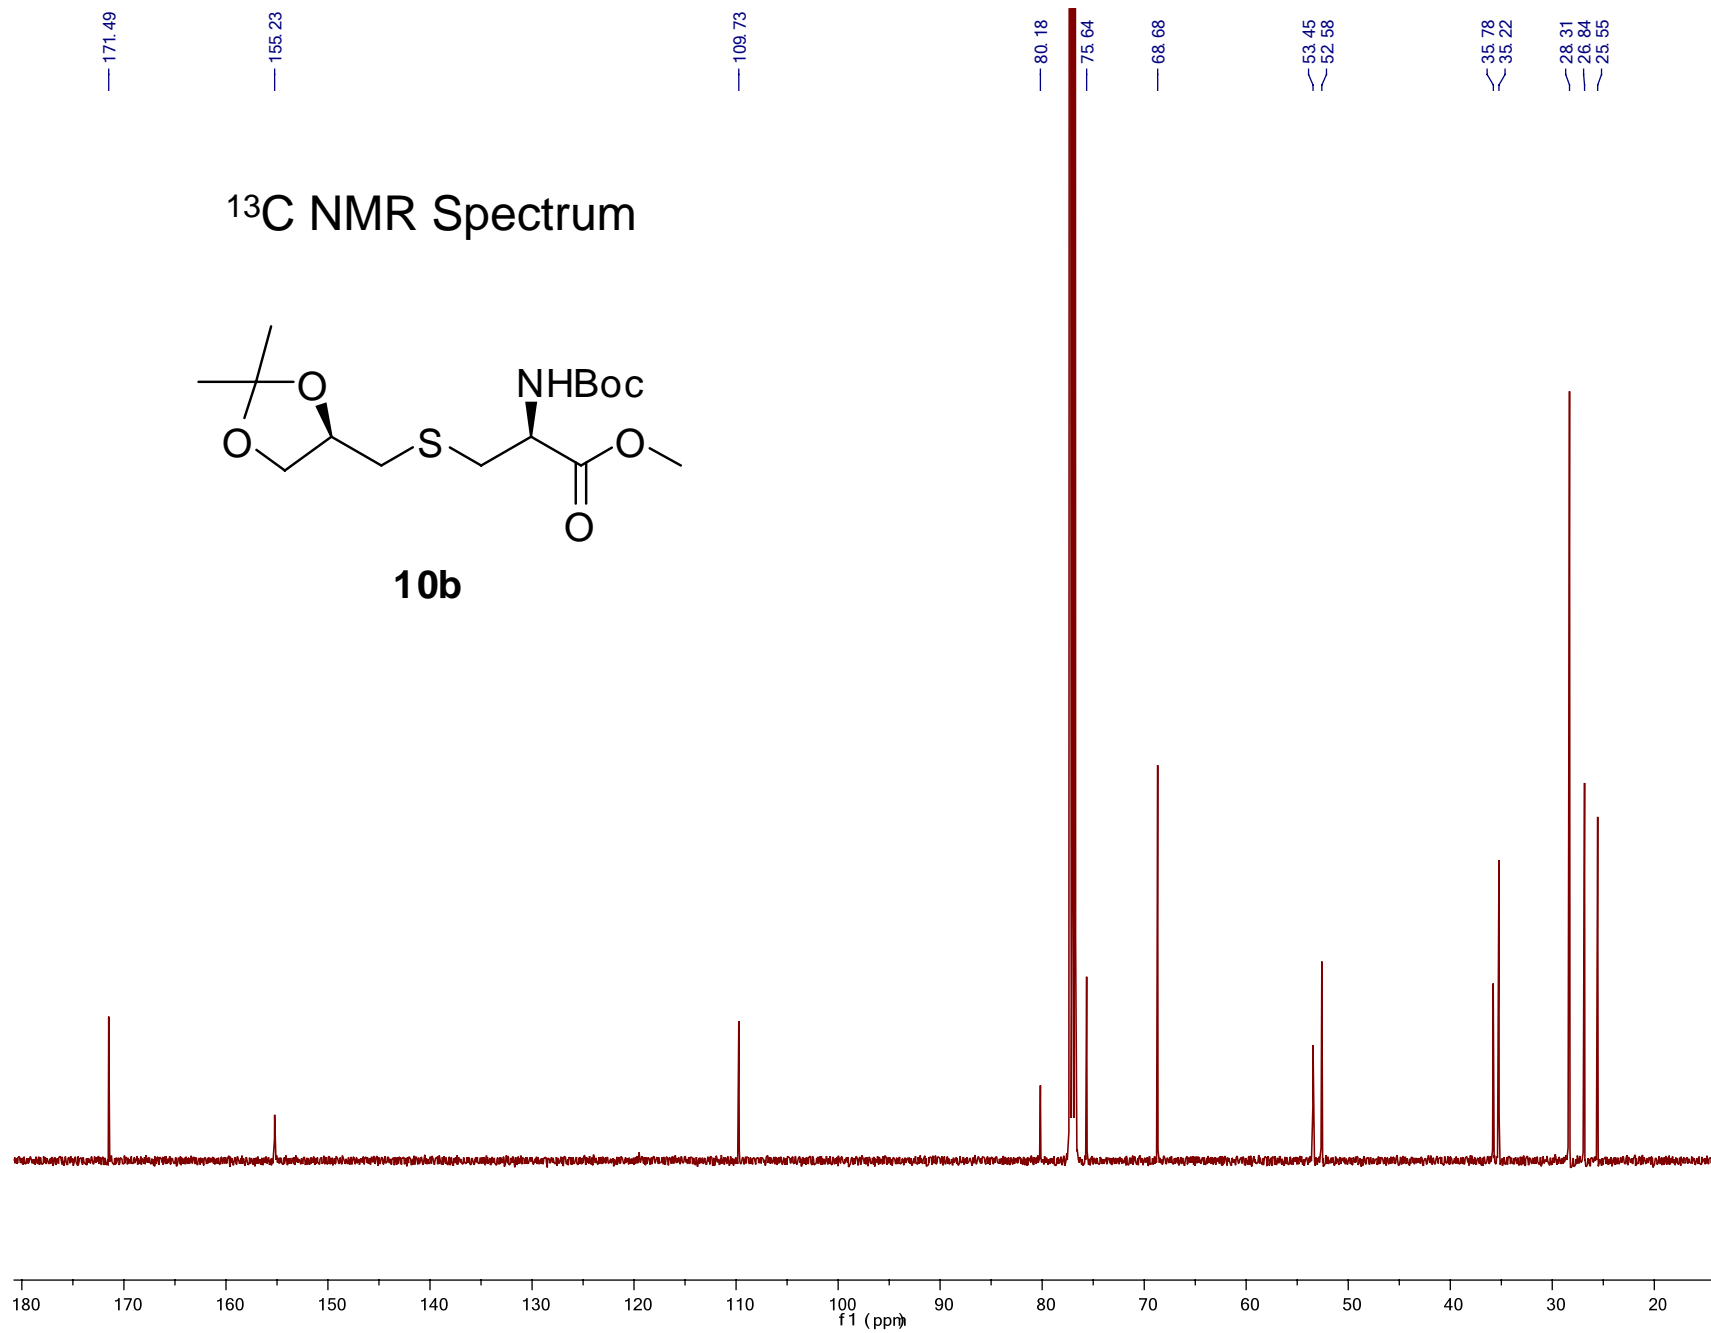

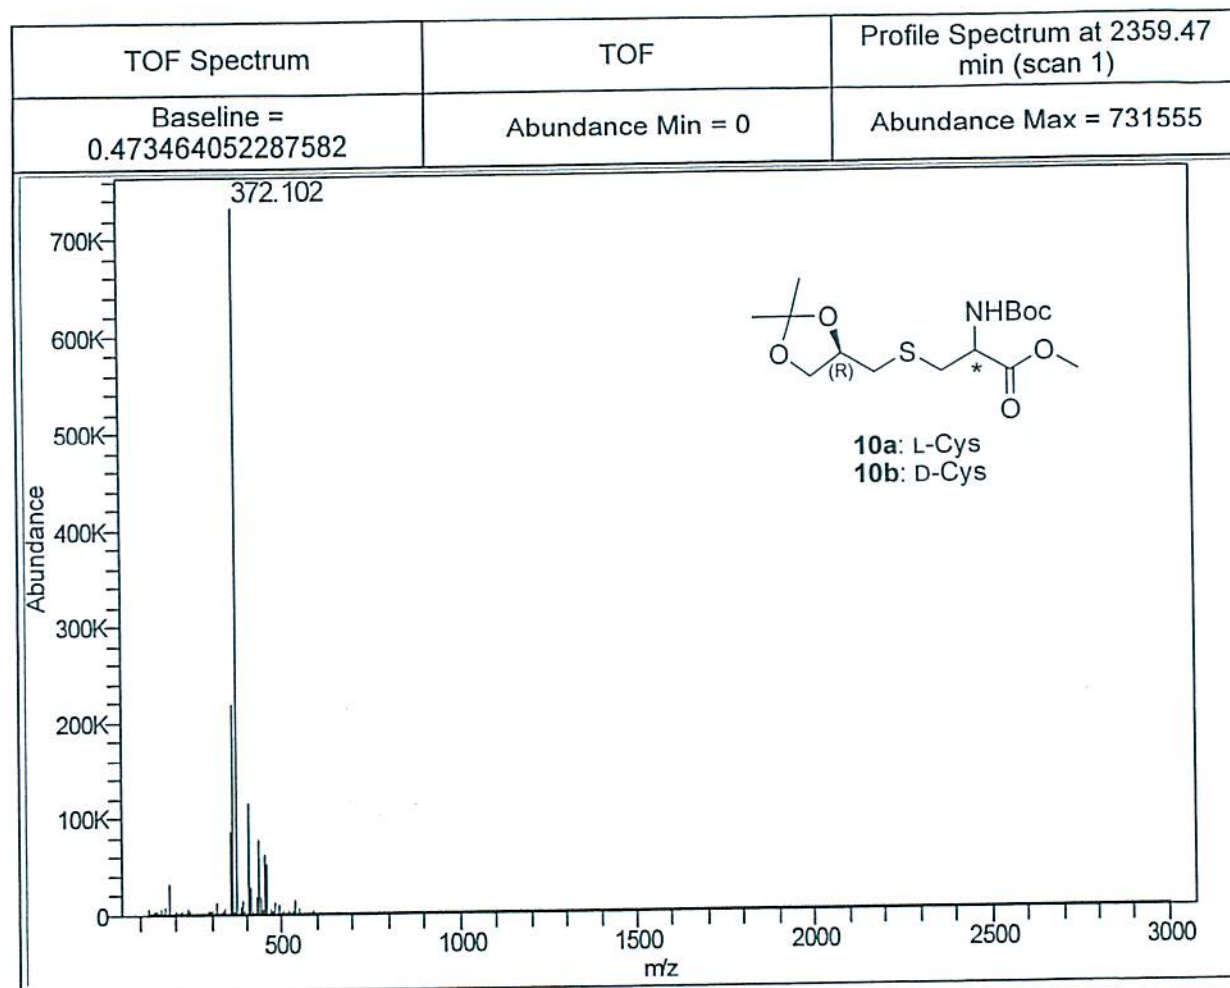

— 8.01

— 5.13

4.32

4.29

4.23

4.12

4.10

4.09

— 3.81

— 3.26

— 3.15

— 2.74

2.32

2.30

2.28

2.26

1.58

1.57

— 1.23

0.87

0.86

0.84

# $^1\text{H}$ NMR Spectrum

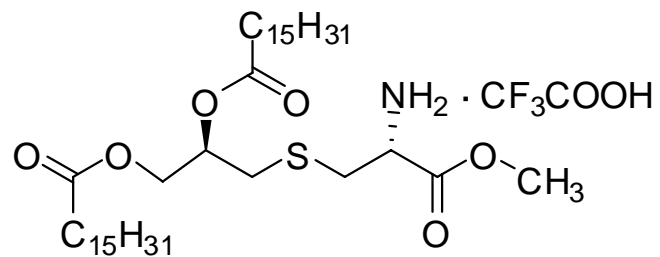**11**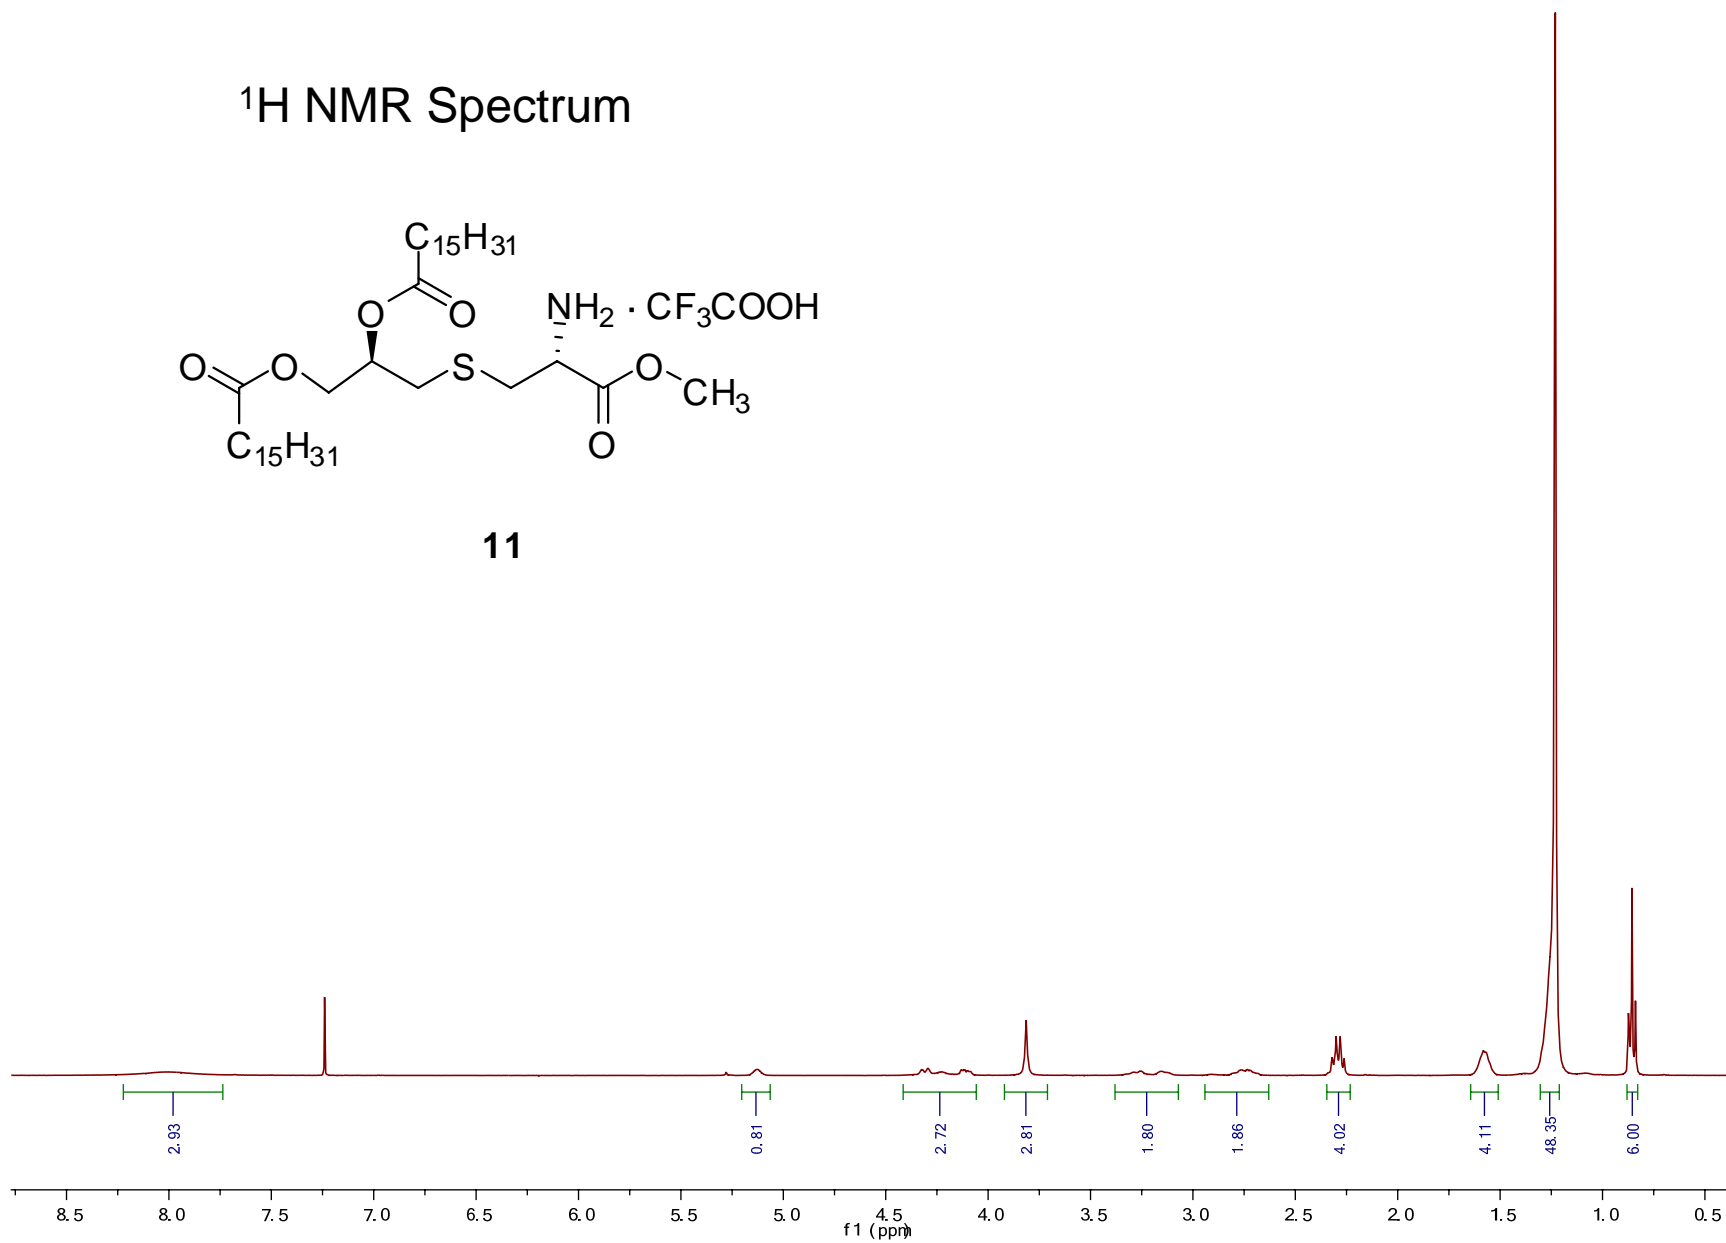

173.66  
173.63  
168.19

### <sup>13</sup>C NMR Spectrum

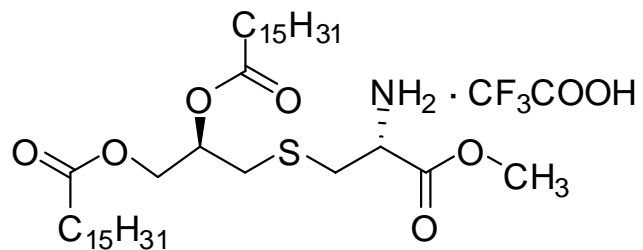

11

69.95  
63.47  
53.73  
52.50  
34.24  
34.02  
32.91  
32.46  
31.94  
29.38  
24.87  
24.83  
22.70  
14.13

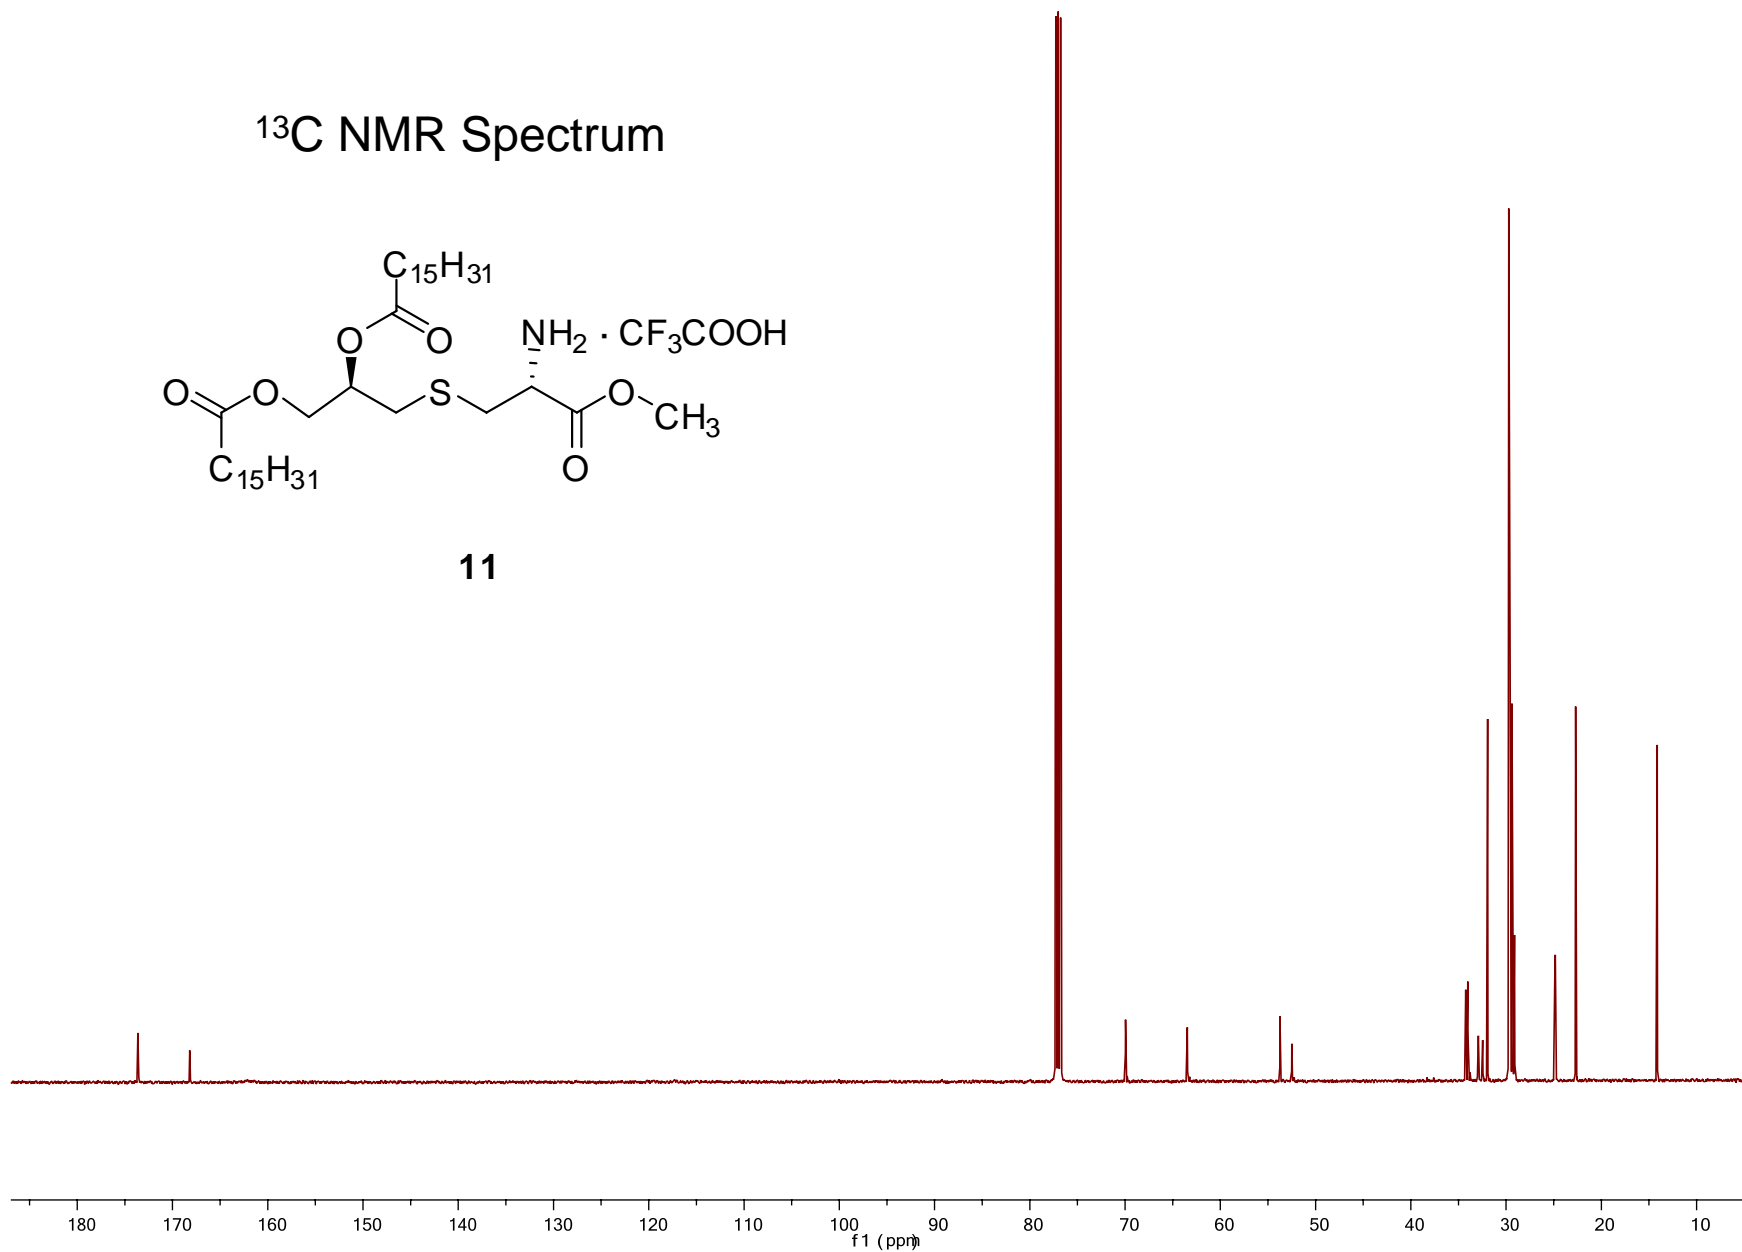

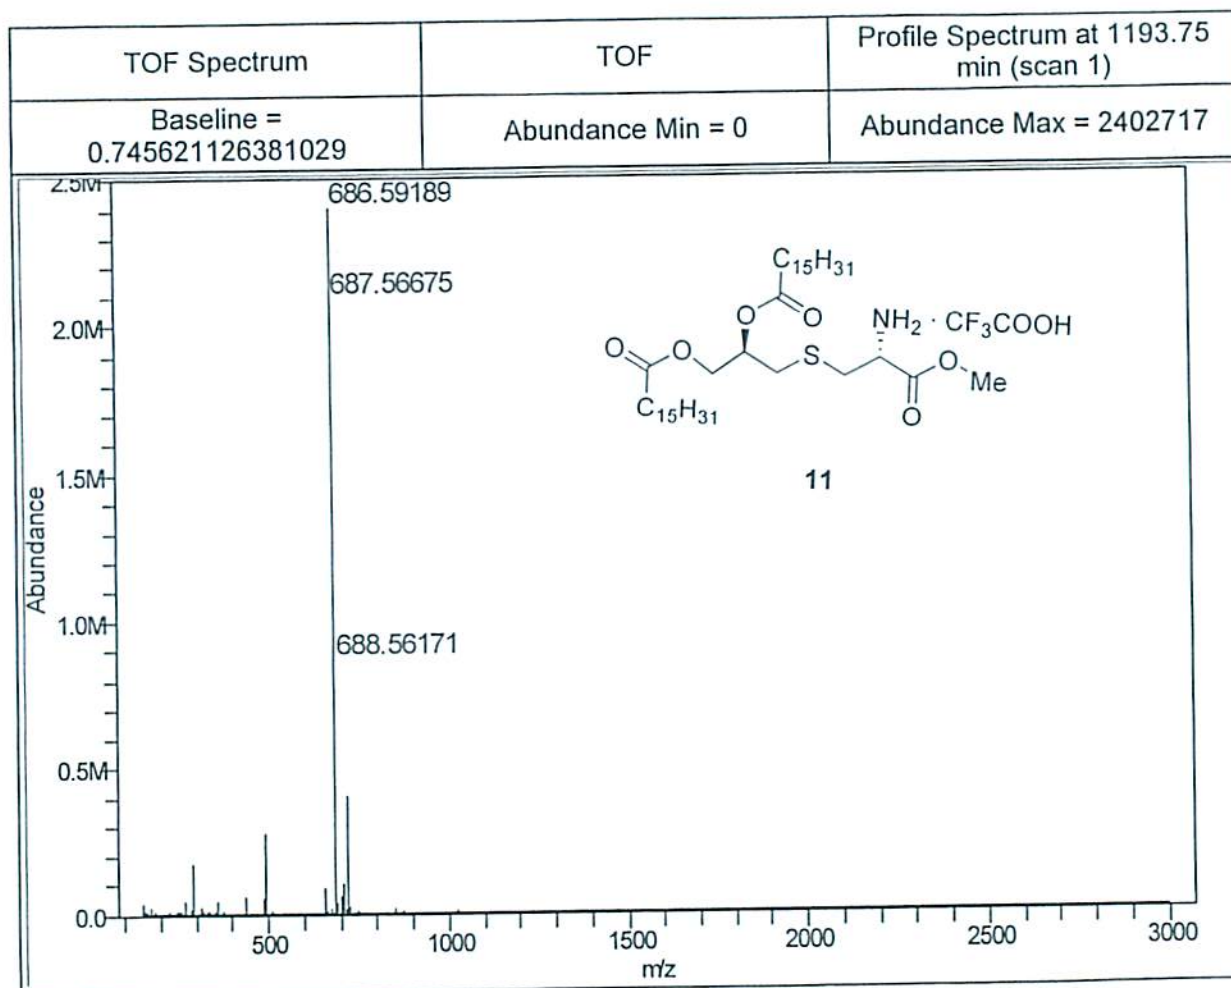

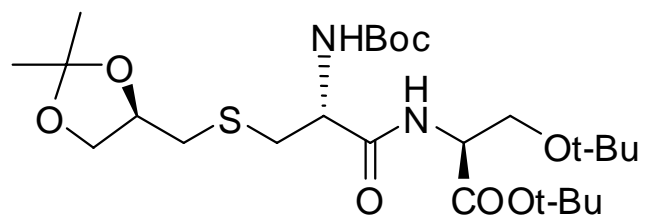

12a

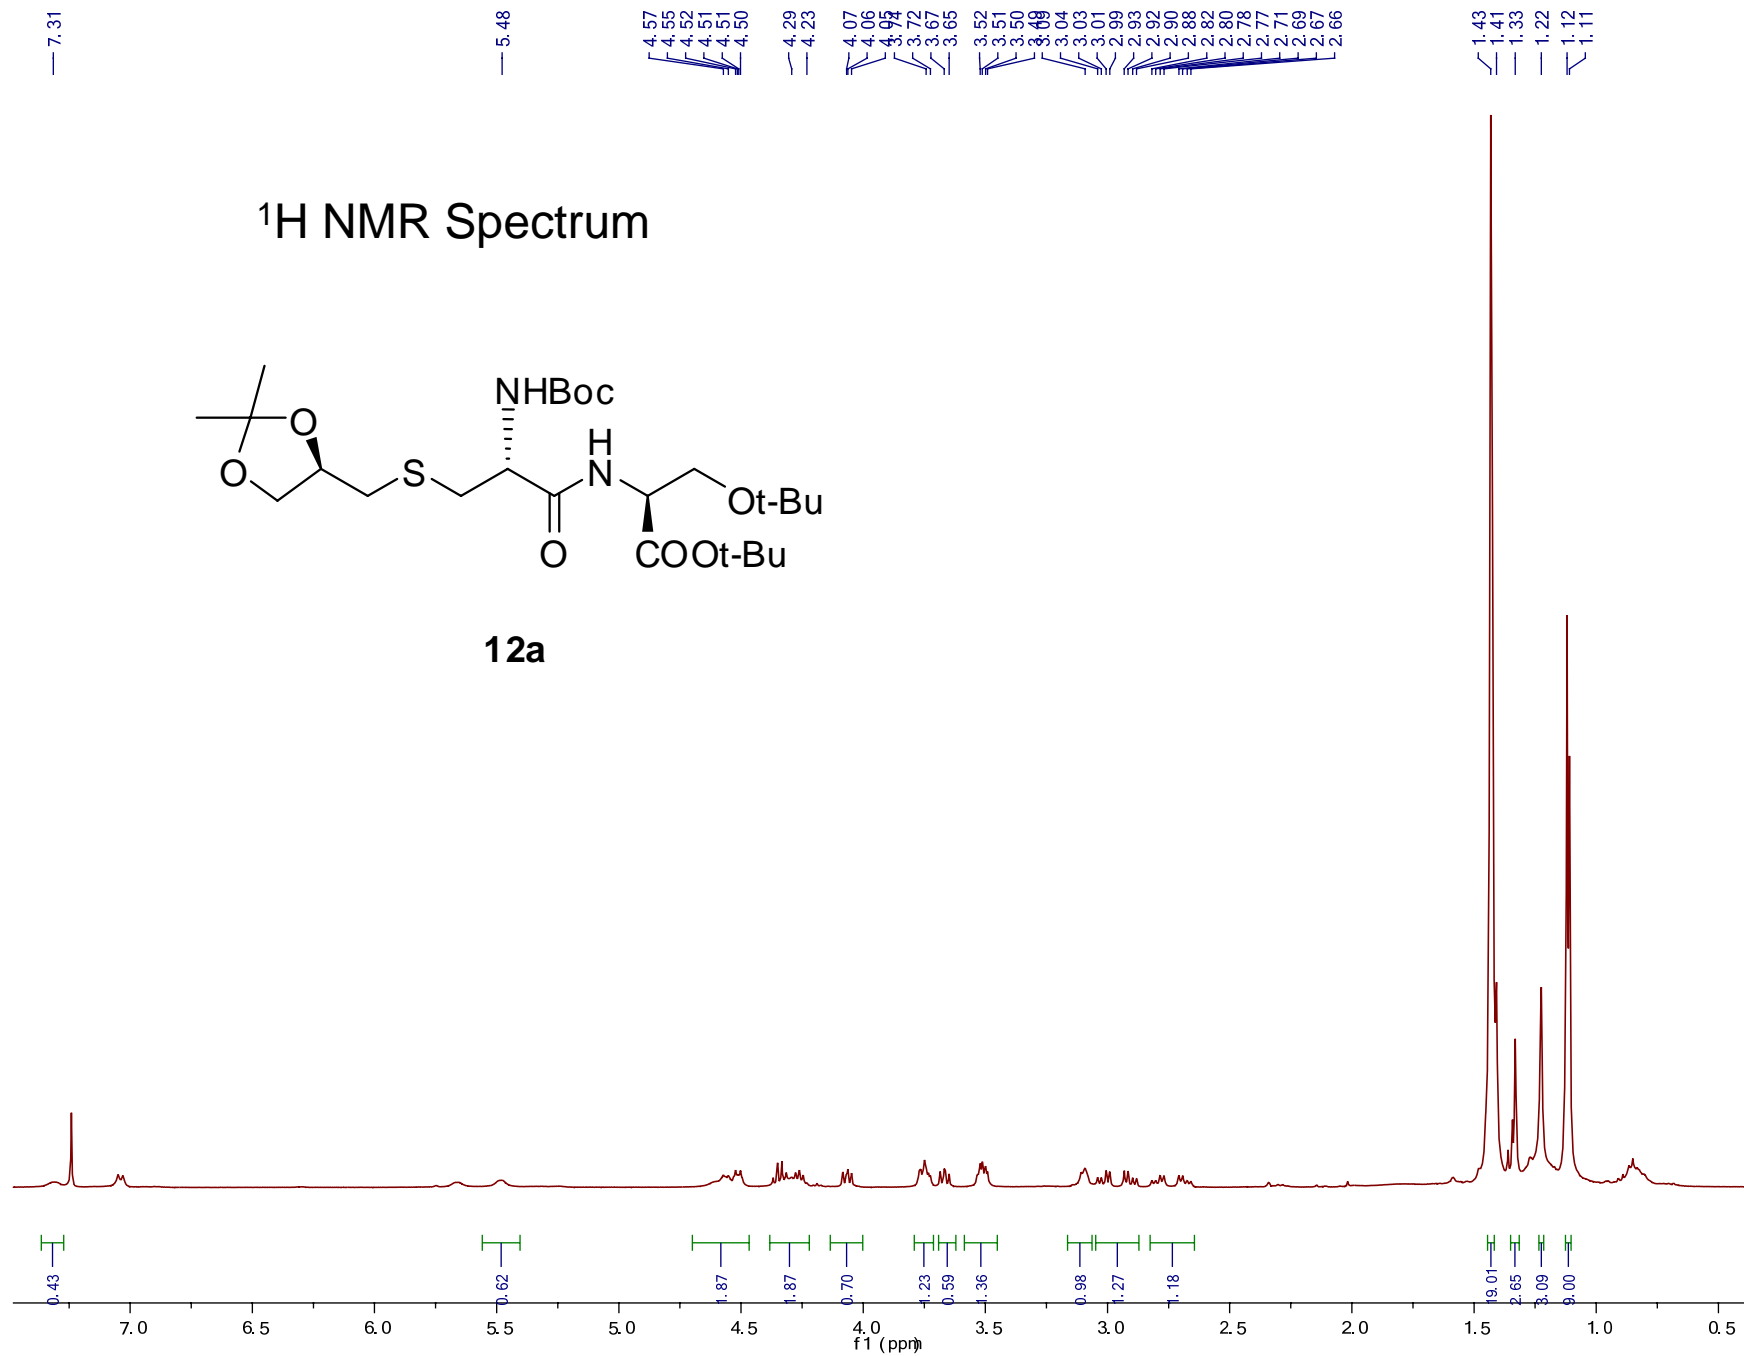

L071209 12 (1.234) Cm (12:15)

1: TOF MS ES+  
557.2854 2.09e5Calc M+Na = C<sub>25</sub>H<sub>46</sub>N<sub>2</sub>O<sub>8</sub>S<sub>1</sub>Na = 557.2873, 3.4 ppm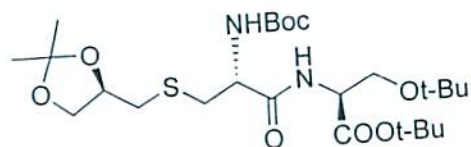

12a

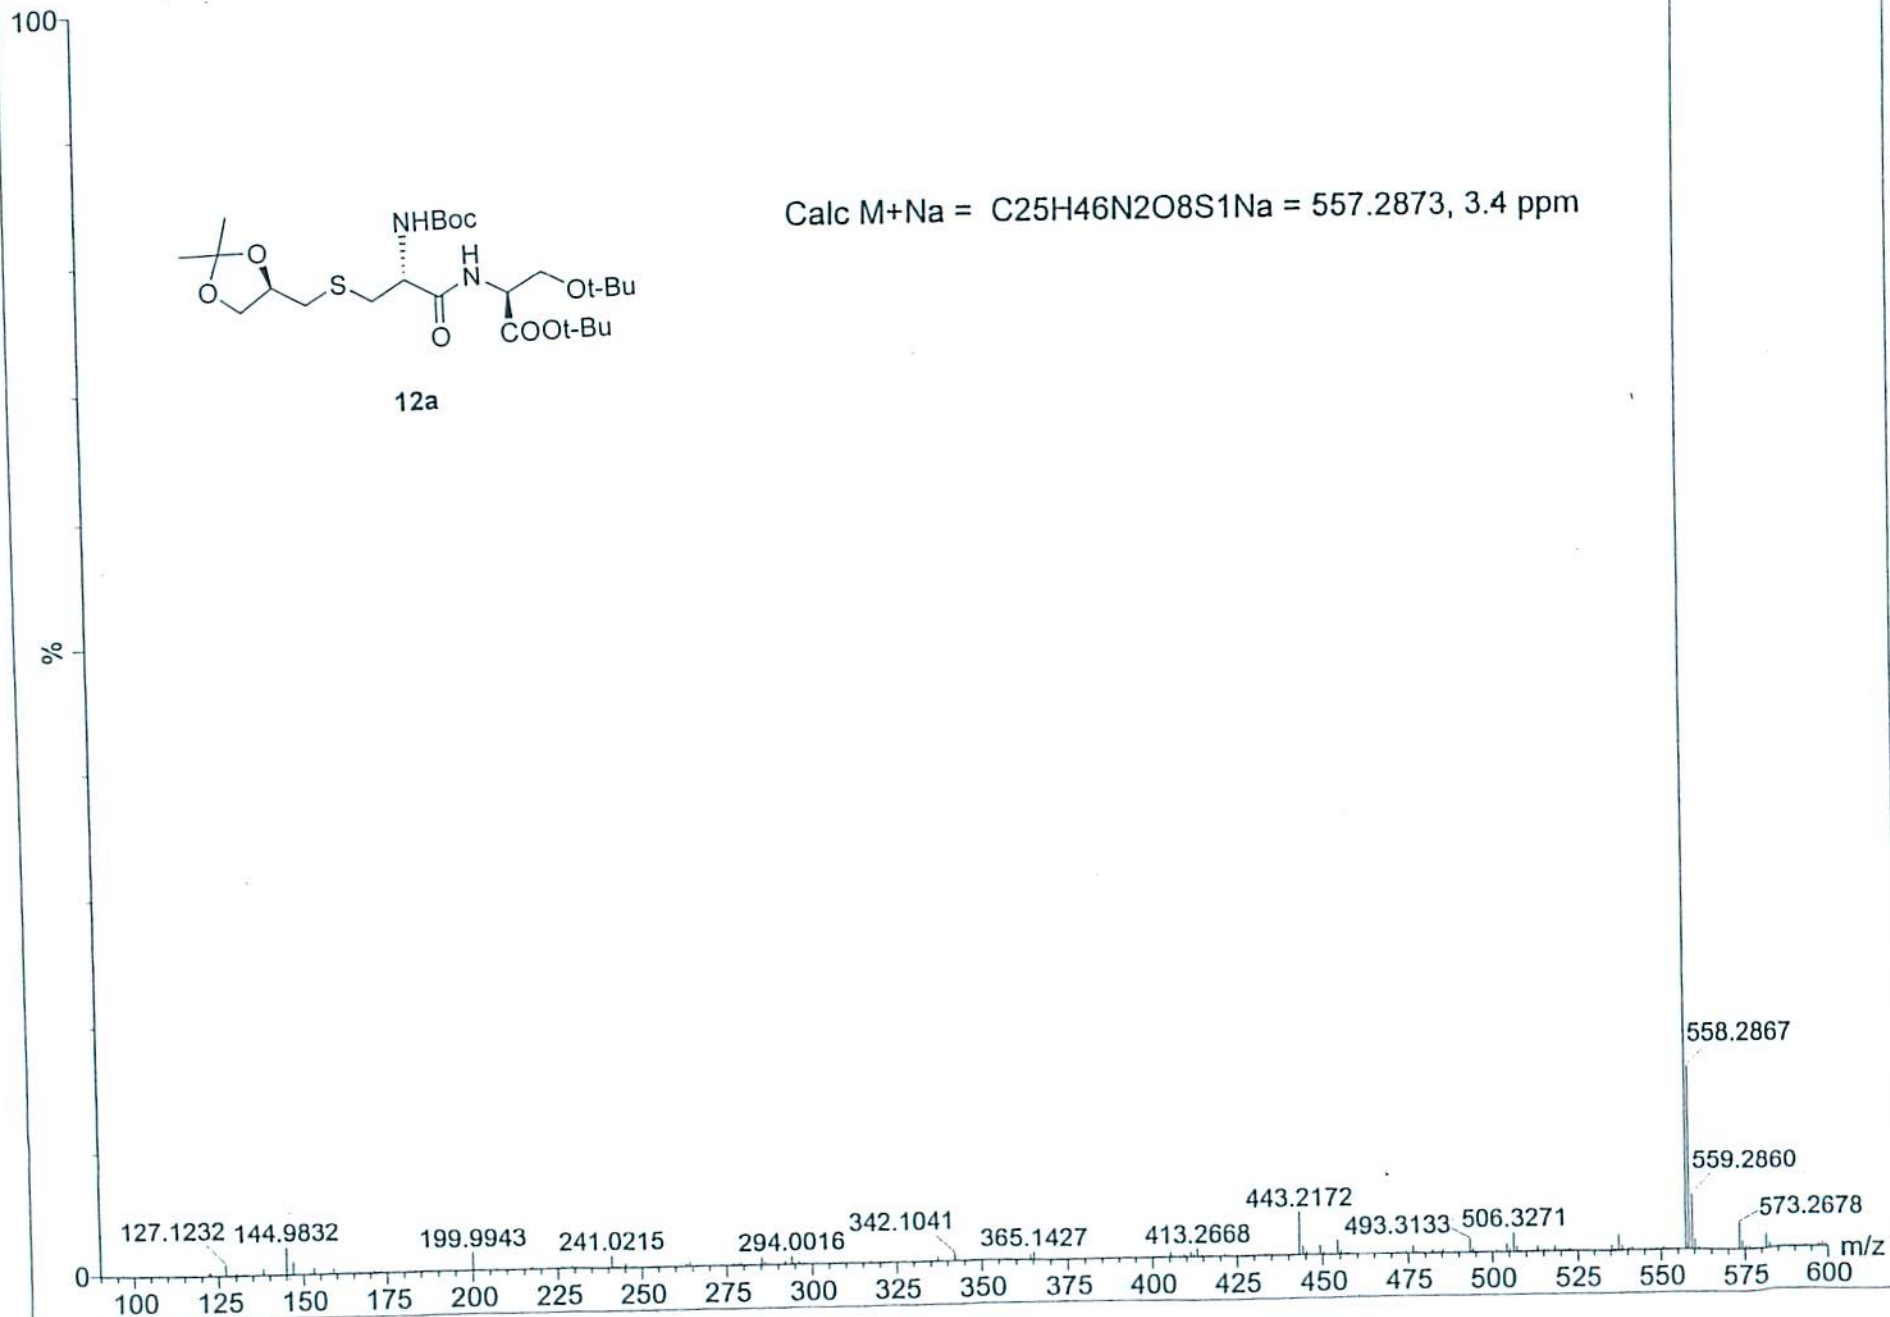

7.08  
7.06

5.48

4.65  
4.63  
4.34  
4.30  
4.27  
4.24  
4.13  
4.08  
3.98  
3.72  
3.68  
3.66  
3.56  
3.55  
3.54  
3.63  
2.93  
2.92  
2.90  
2.88  
2.84  
2.82  
2.81  
2.79  
2.77  
2.74  
2.72  
2.71  
2.691.44  
1.42  
1.34  
1.12 $^1\text{H}$  NMR Spectrum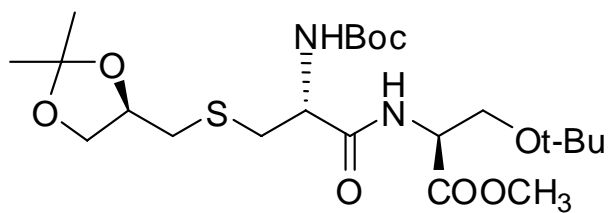**12b**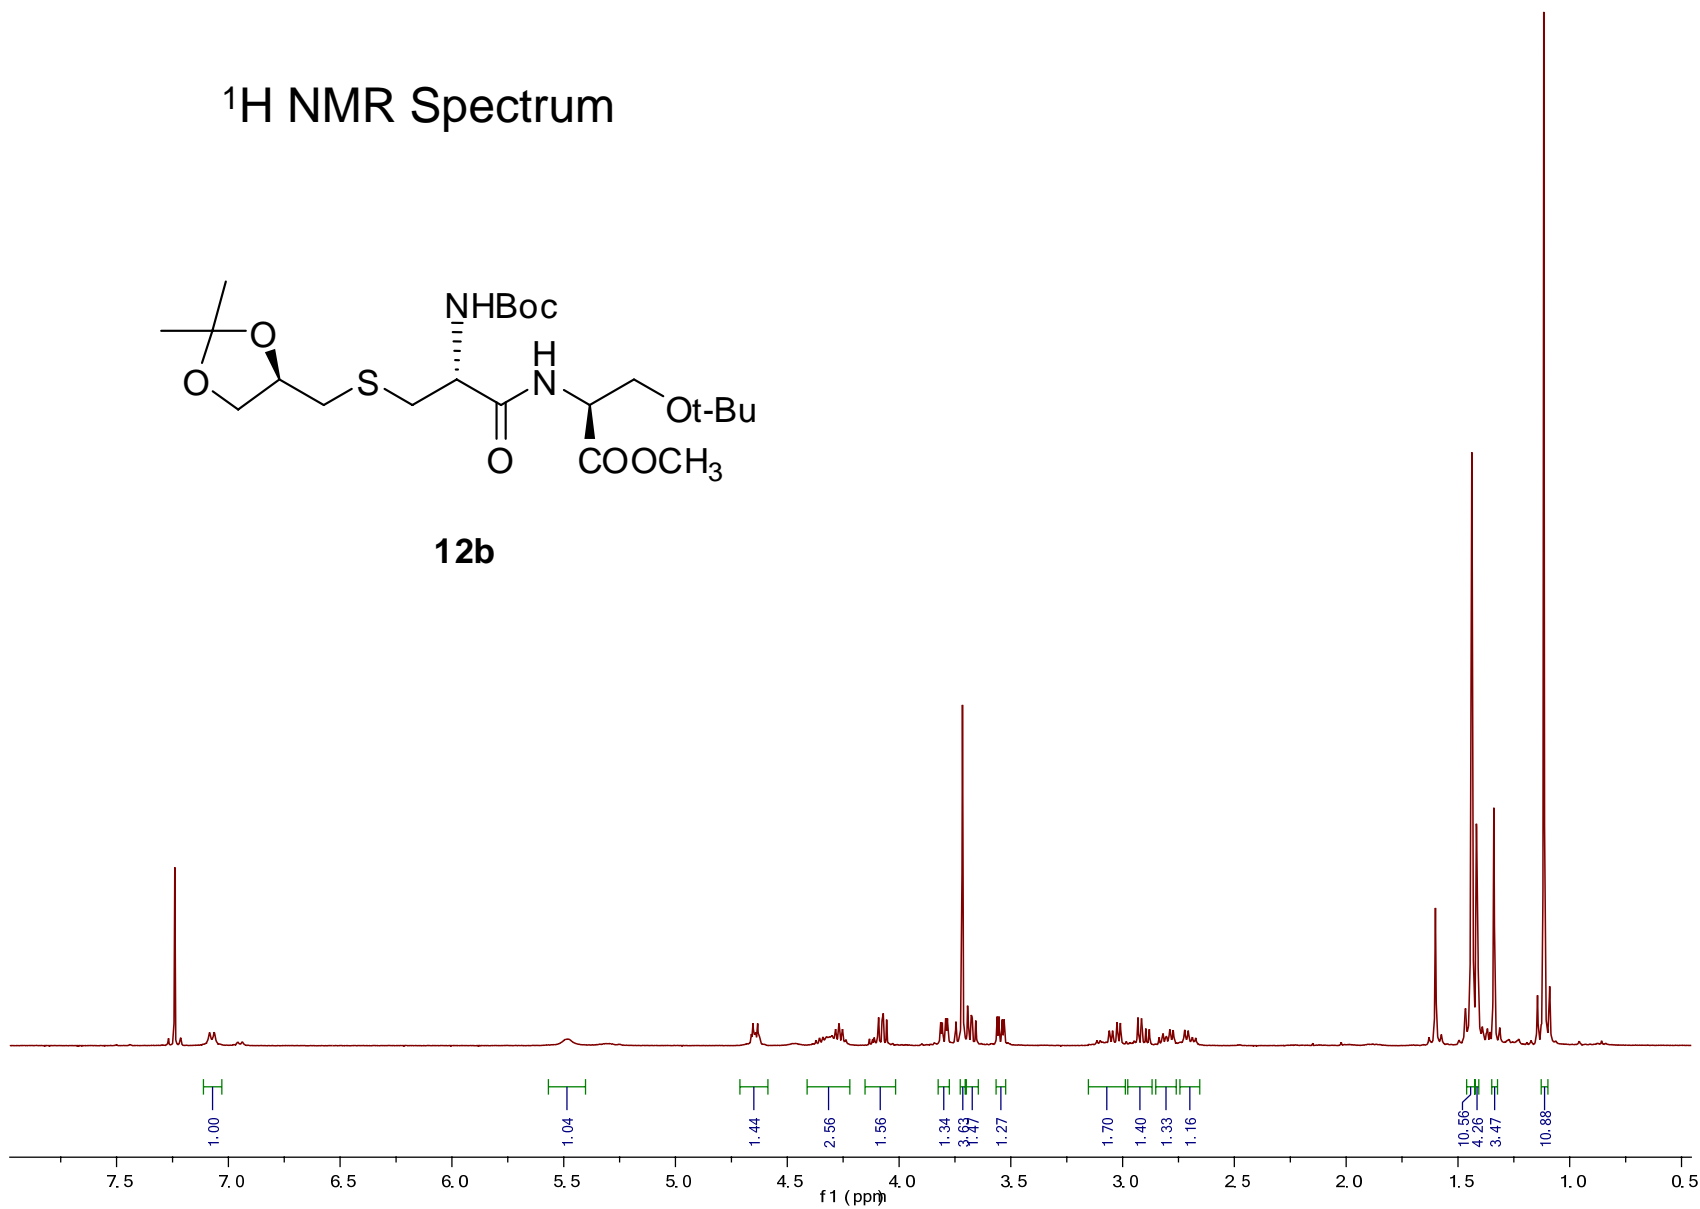



170.47  
170.41

109.70

 $^{13}\text{C}$  NMR Spectrum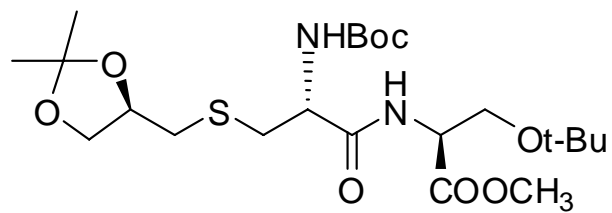**12b**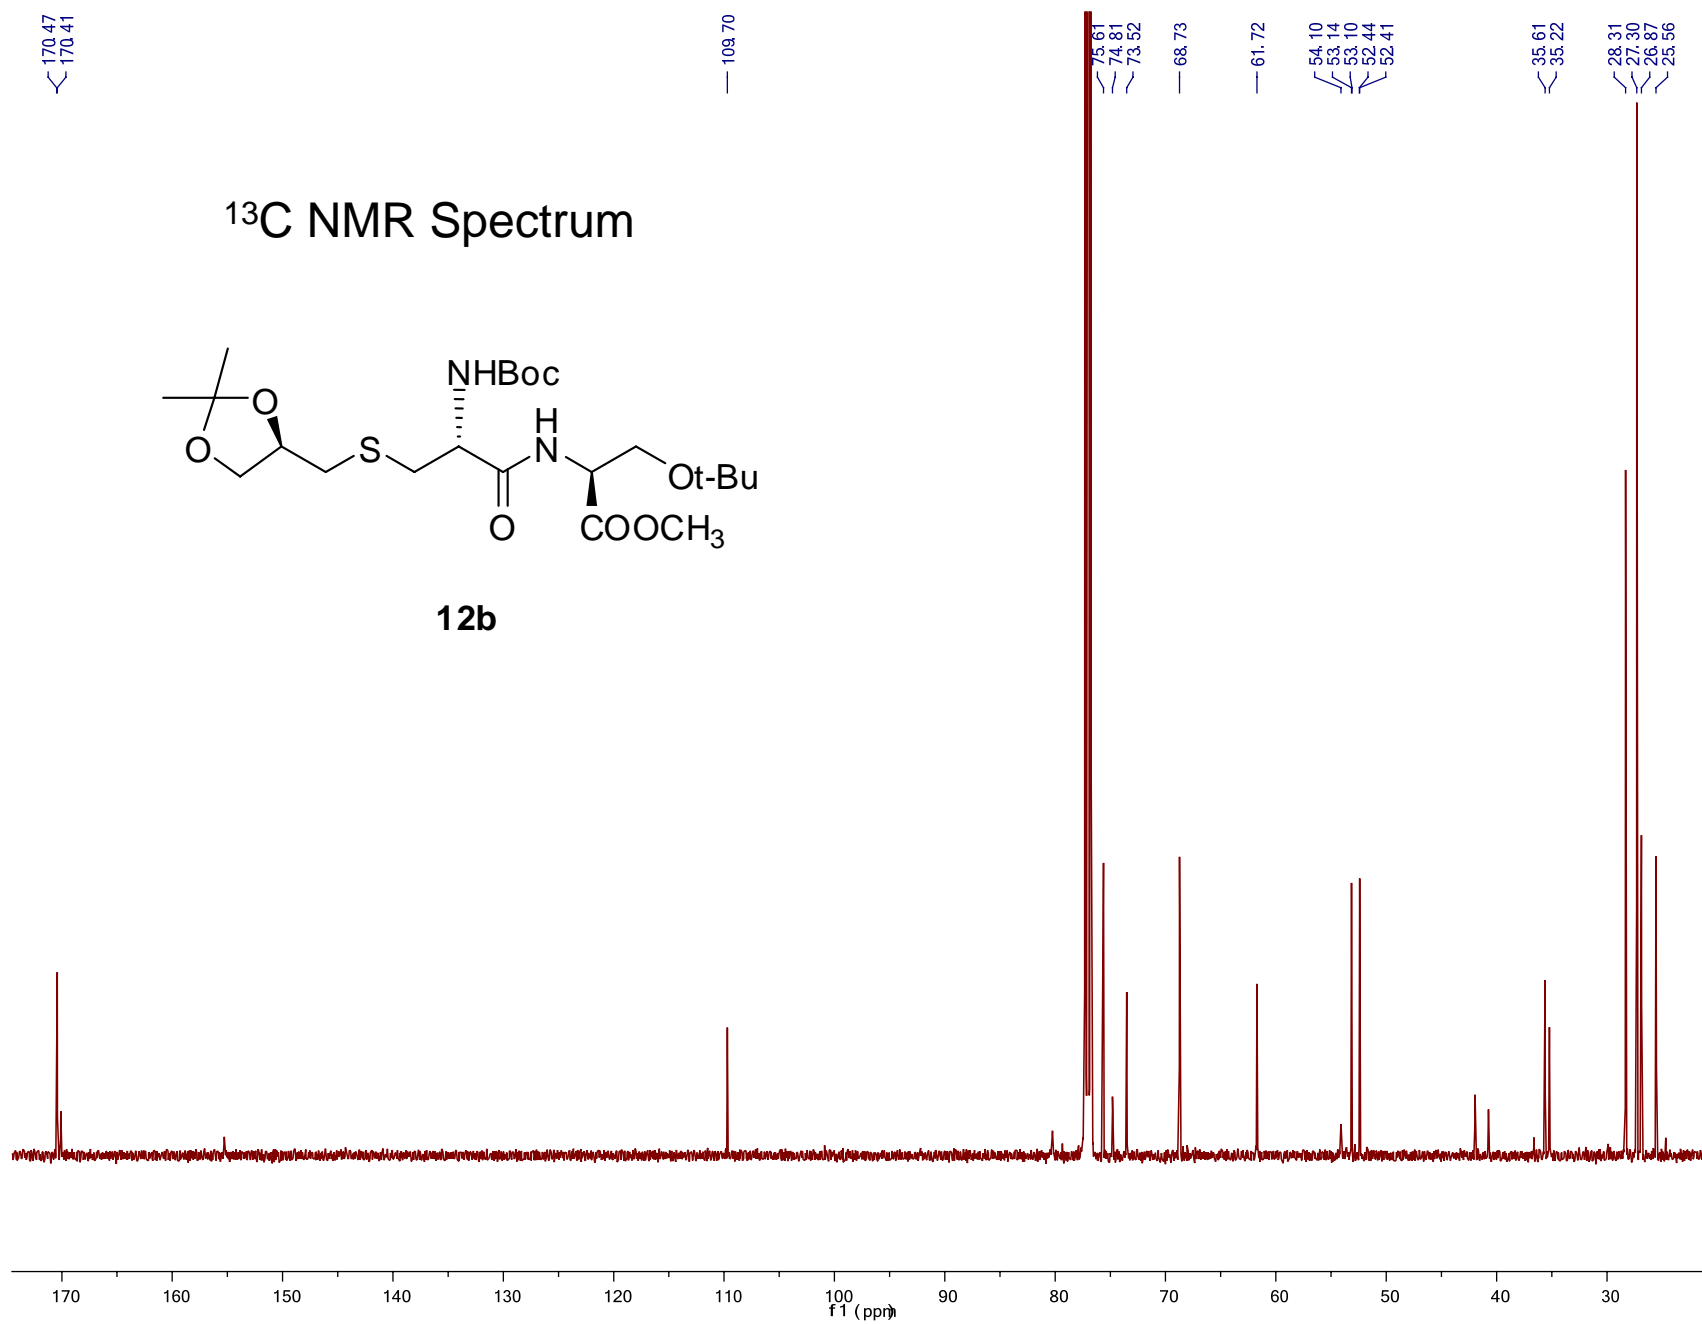

7.19  
7.17

5.55

4.72  
4.704.32  
4.30  
4.29  
4.274.13  
4.11  
4.09  
3.86  
3.843.68  
3.58  
3.563.15  
3.14  
3.12  
2.962.91  
2.87  
2.85  
2.83  
2.81  
2.80  
2.78  
2.76  
2.75  
2.73  
2.721.48  
1.45  
1.38

1.15

# <sup>1</sup>H NMR Spectrum

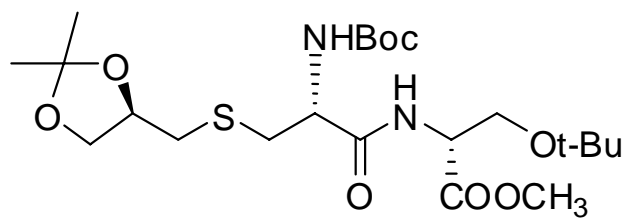**12c**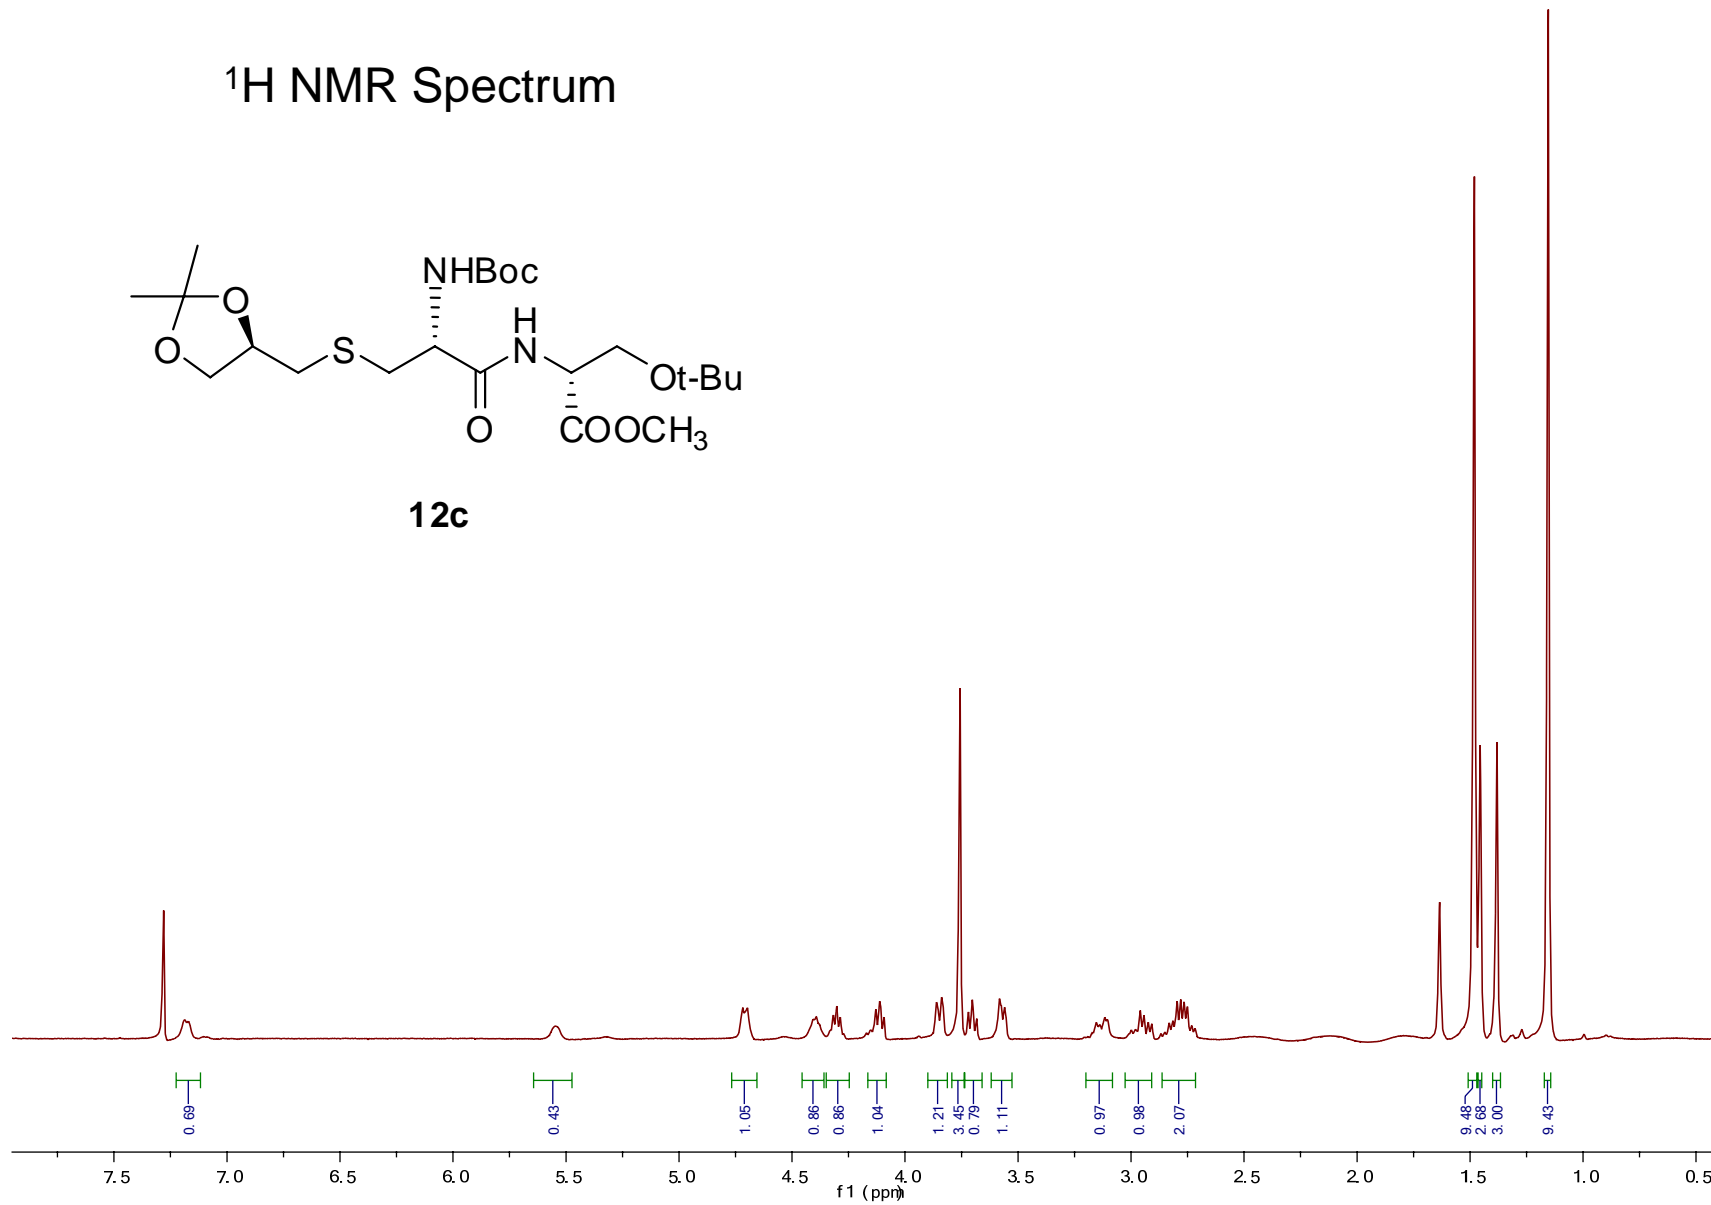

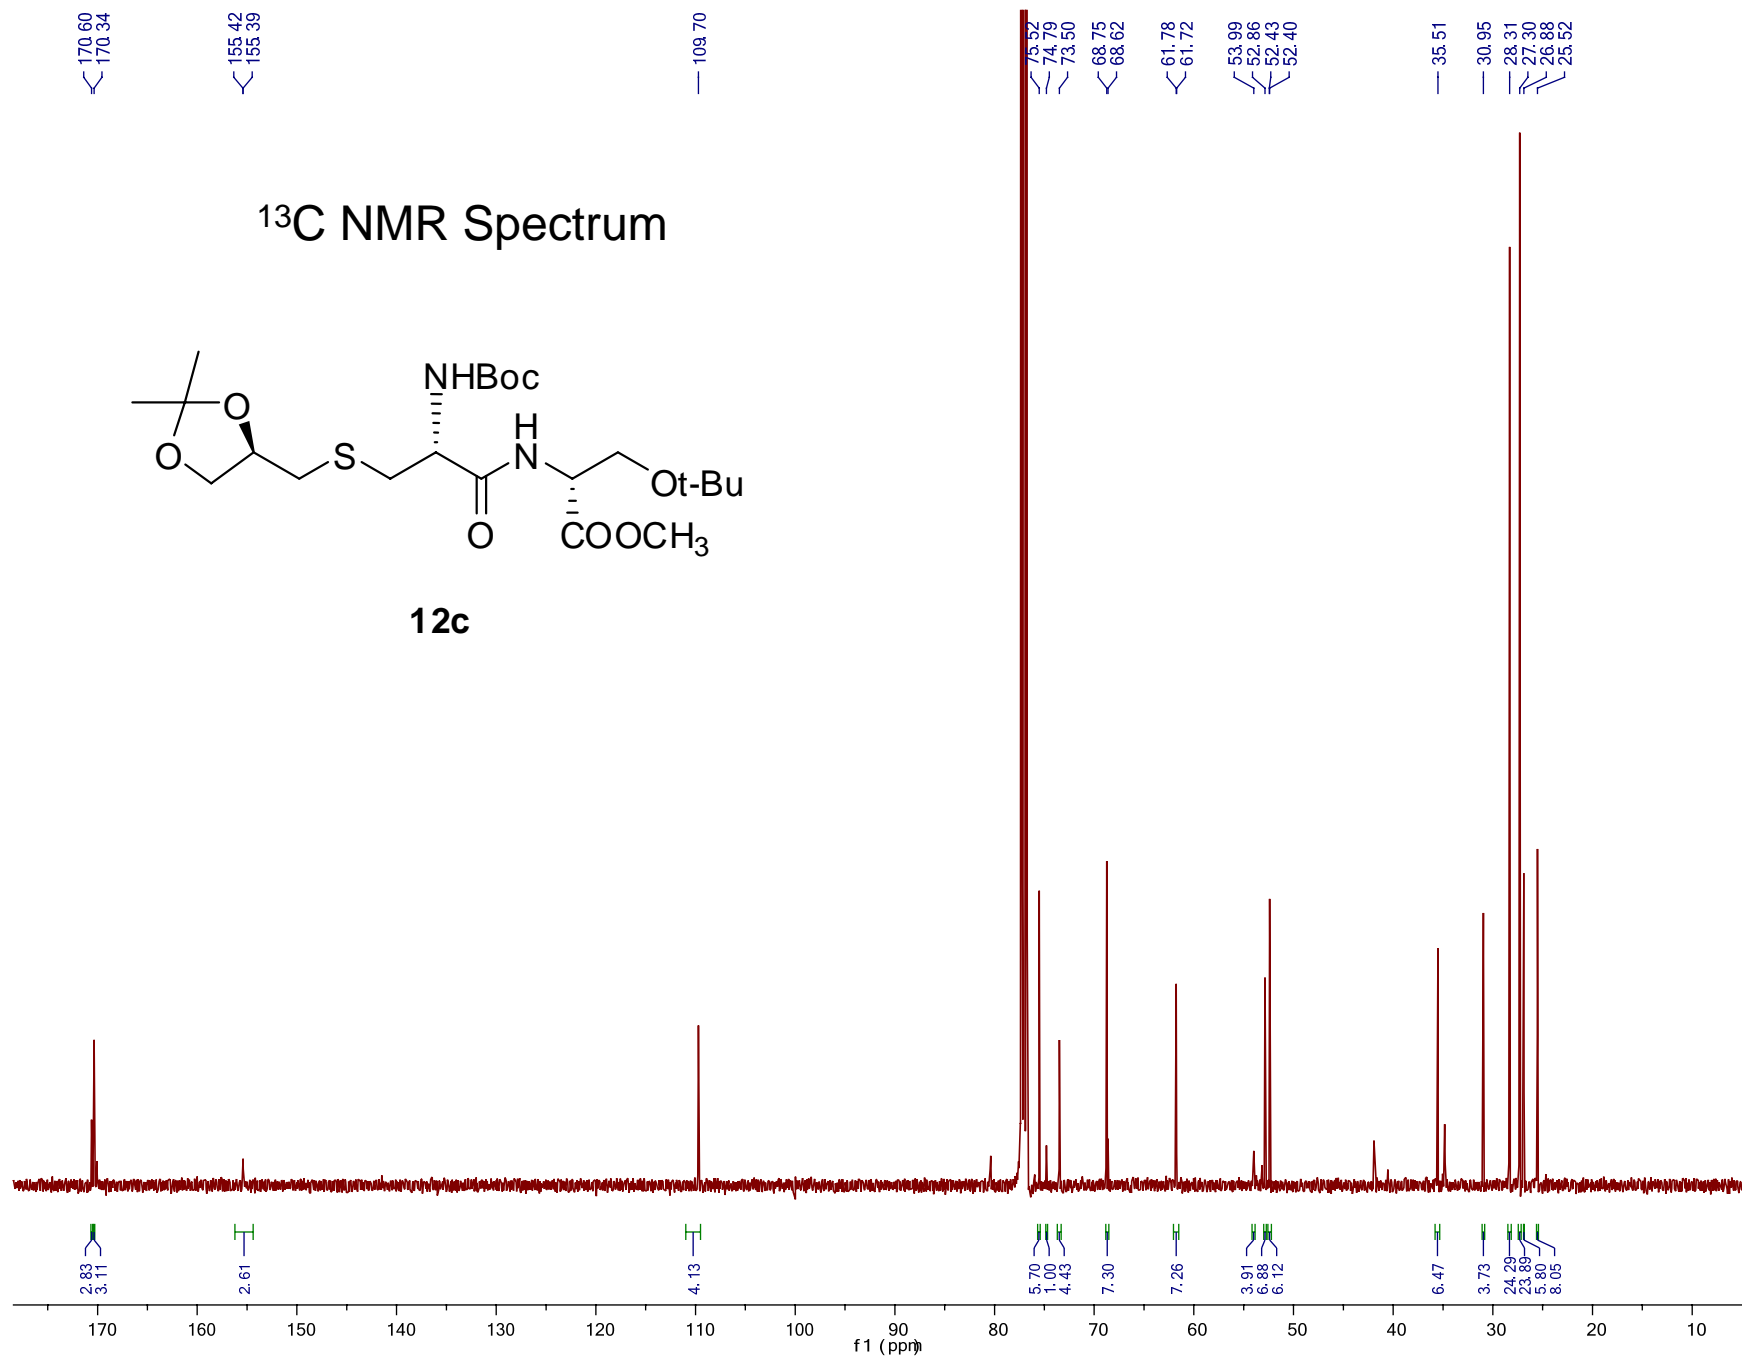

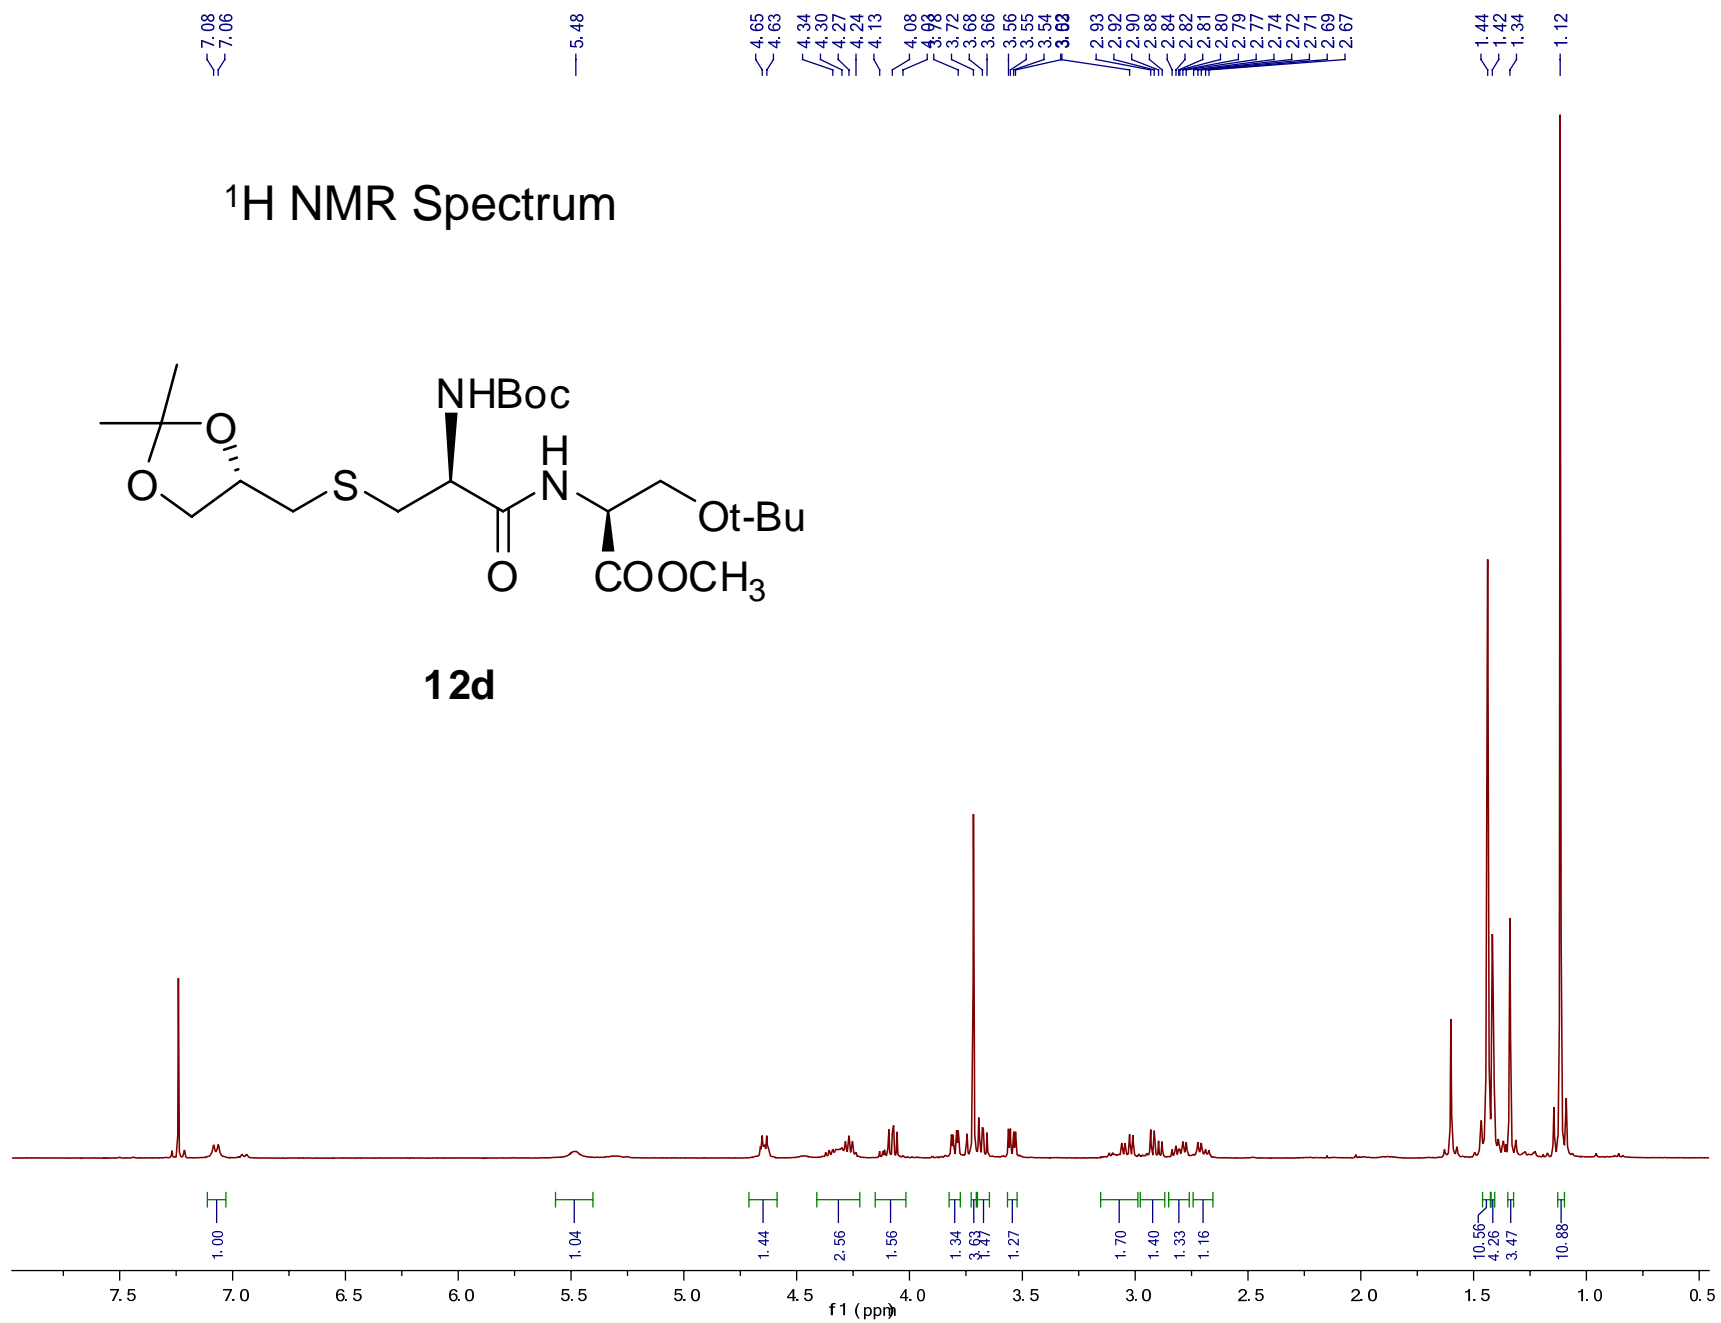

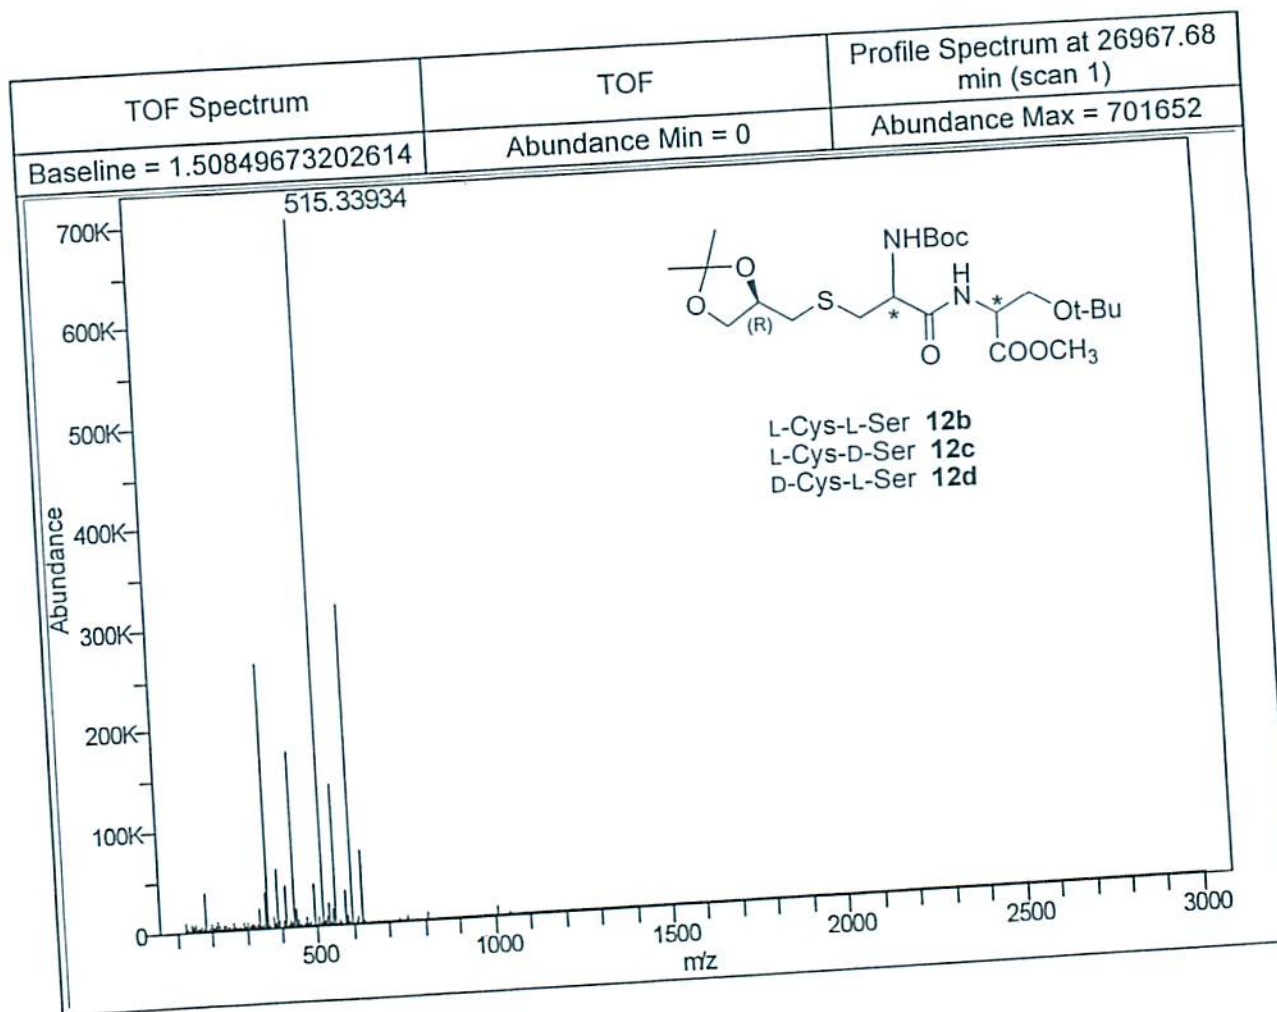

7.03  
7.015.37  
5.17  
5.16  
5.154.53  
4.52  
4.51  
4.50  
4.49  
4.29

4.12

3.78  
3.75  
3.753.52  
3.52  
3.50  
3.492.94  
2.93  
2.792.33  
2.31  
2.30  
2.29  
2.271.61  
1.59  
1.58  
1.561.44  
1.431.23  
1.13  
1.120.87  
0.84 $^1\text{H}$  NMR Spectrum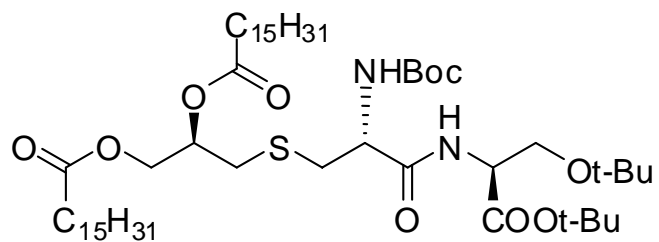**13a**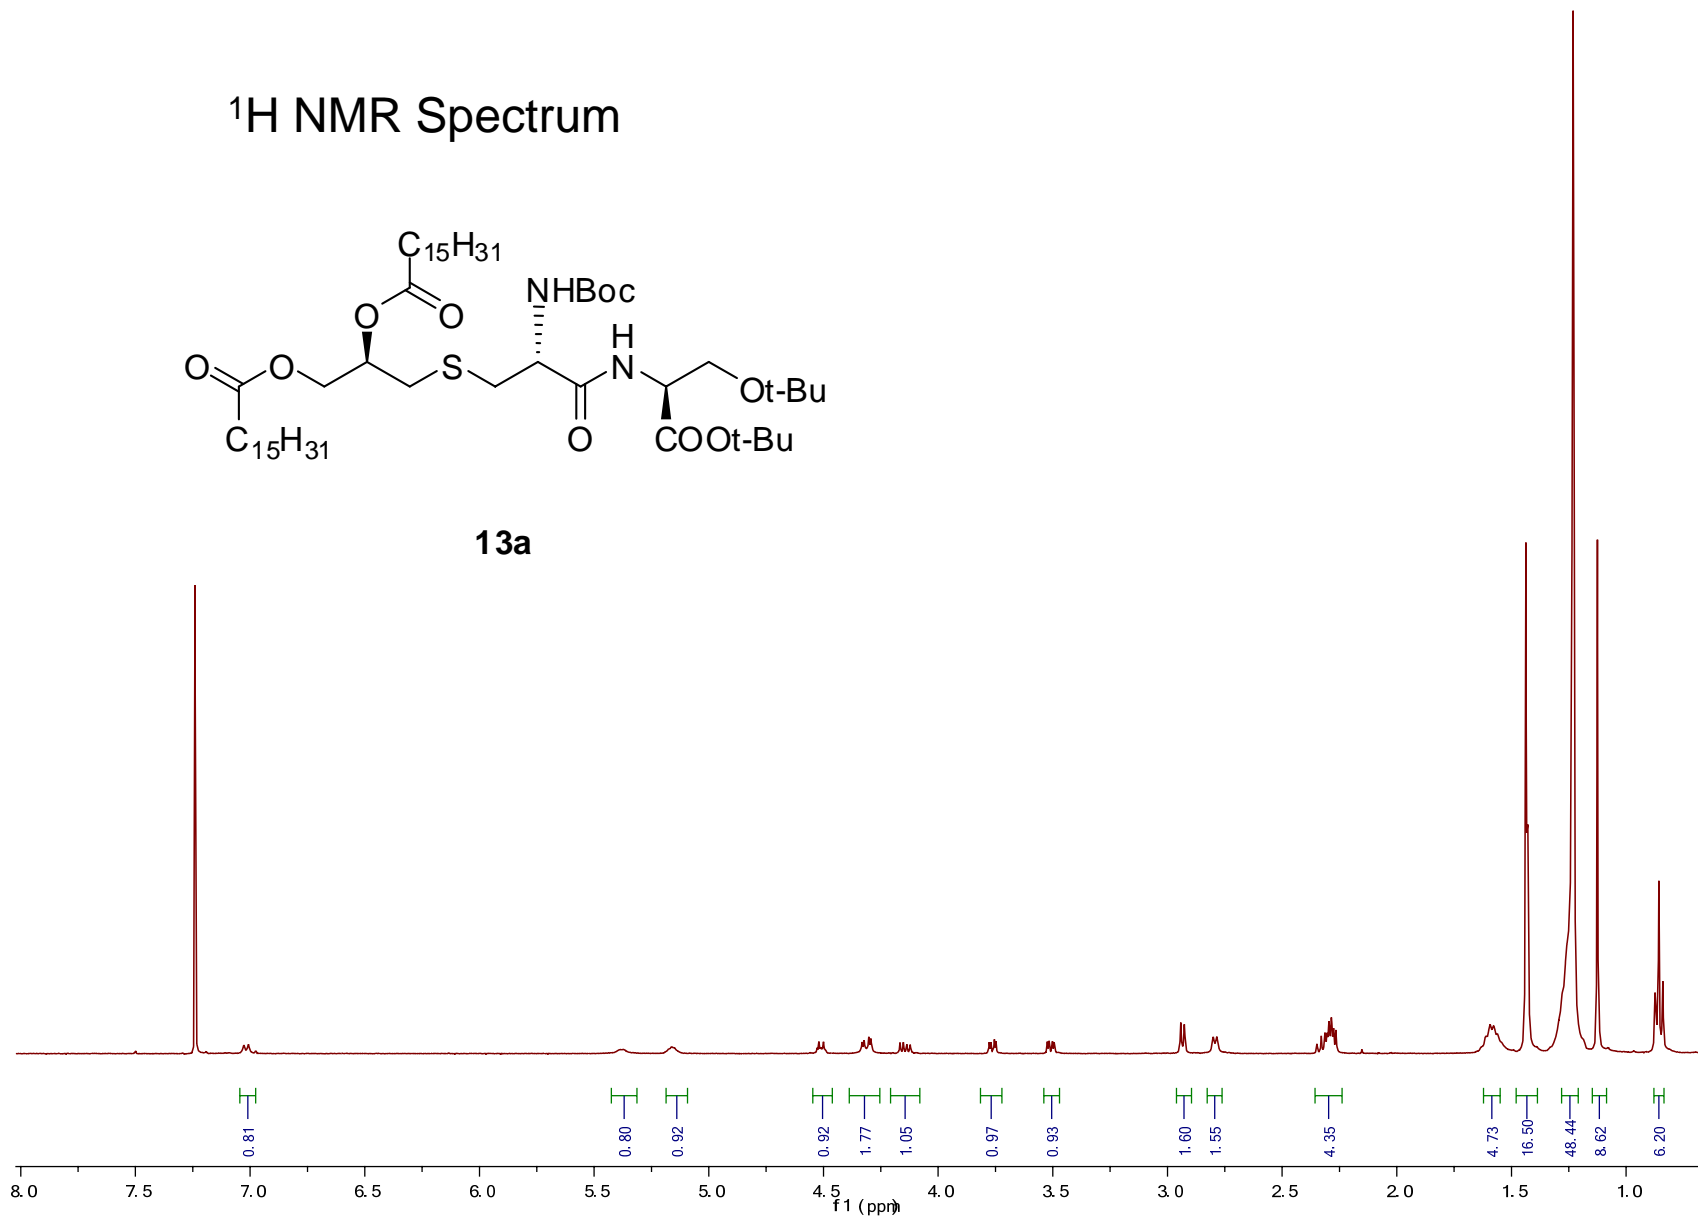

173.40  
173.13  
170.13  
168.92

### $^{13}\text{C}$ NMR Spectrum

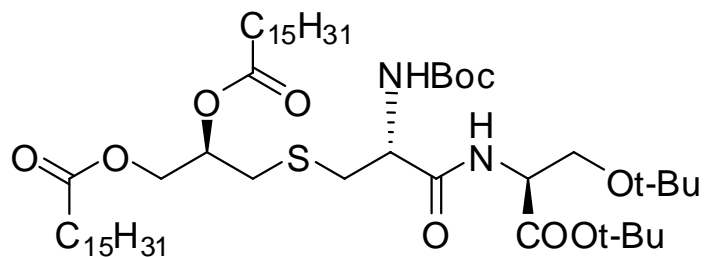

**13a**

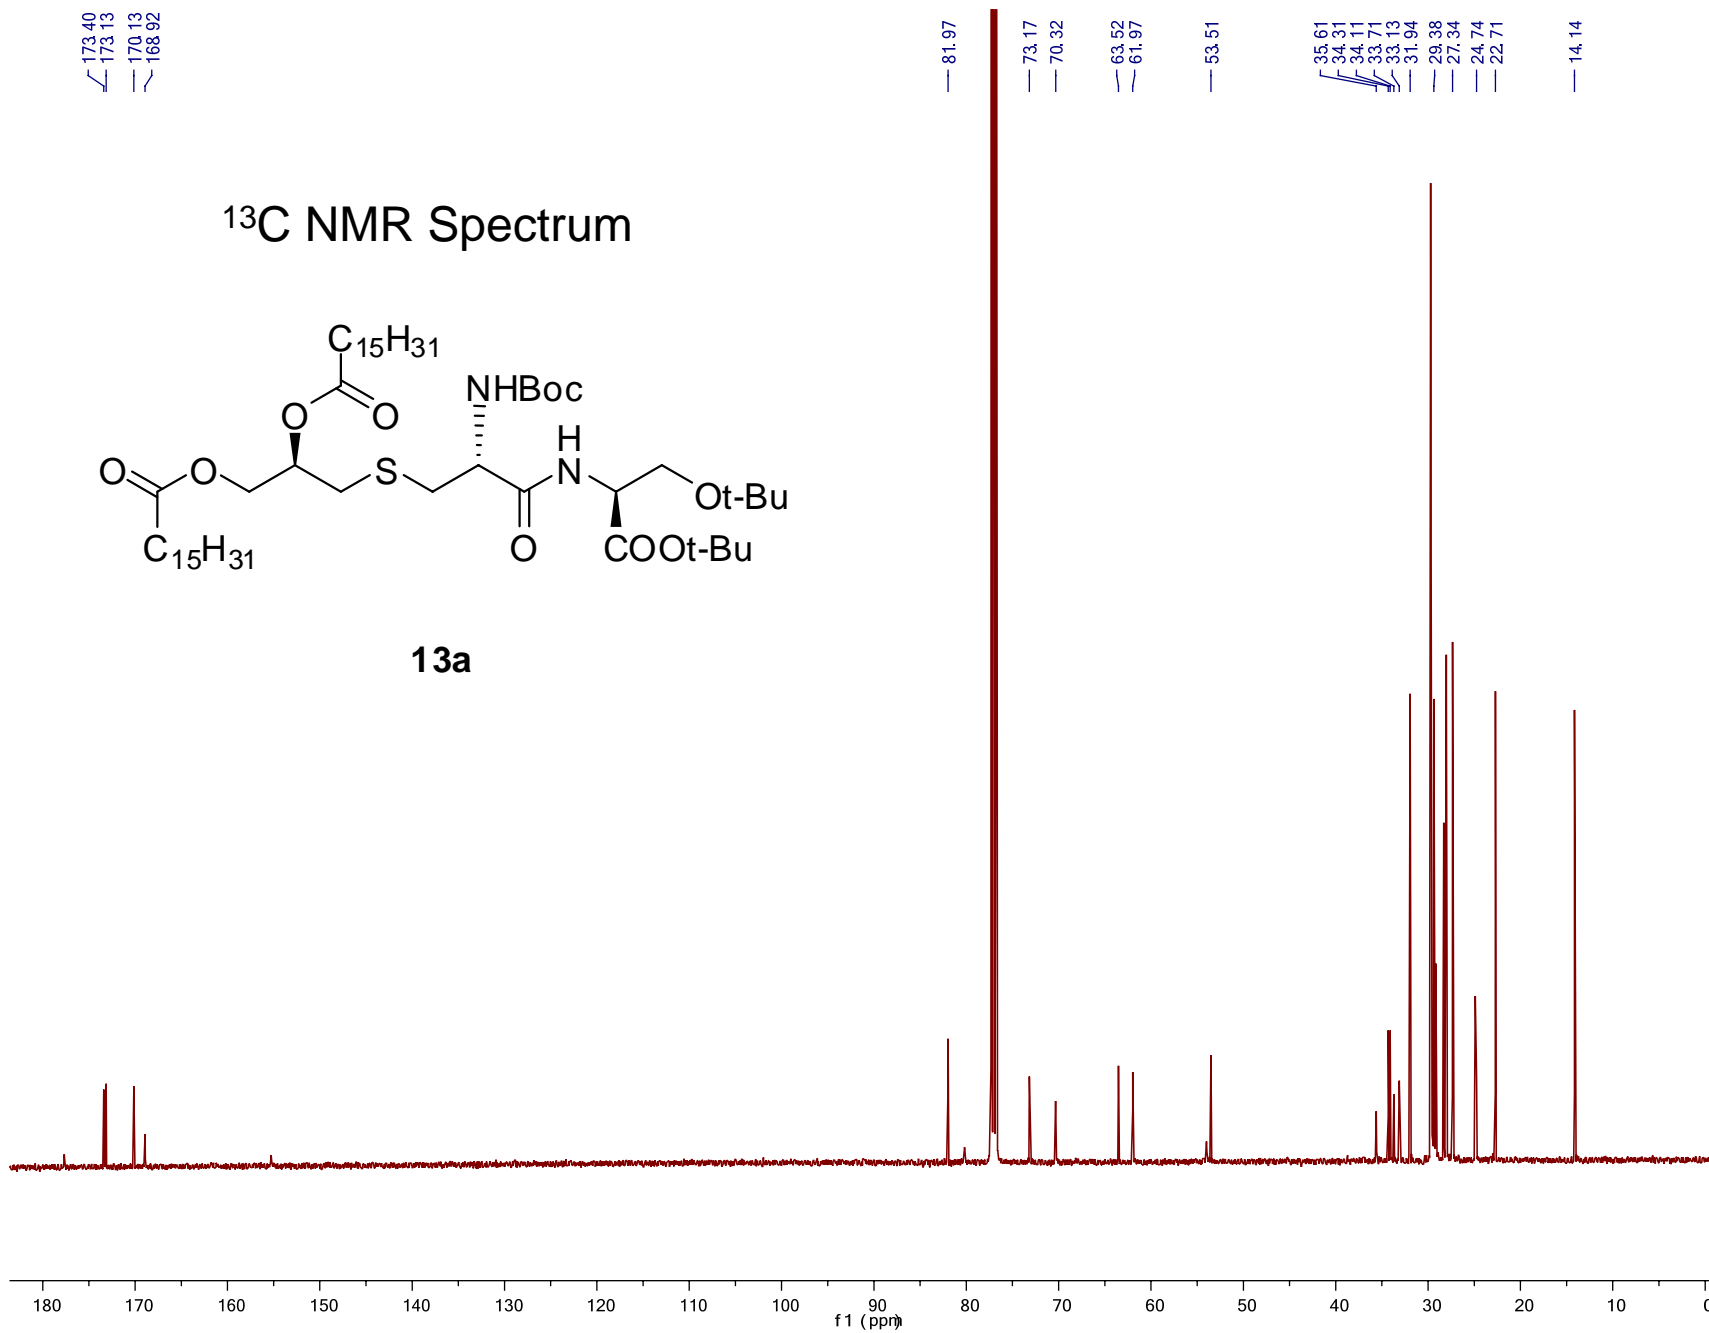

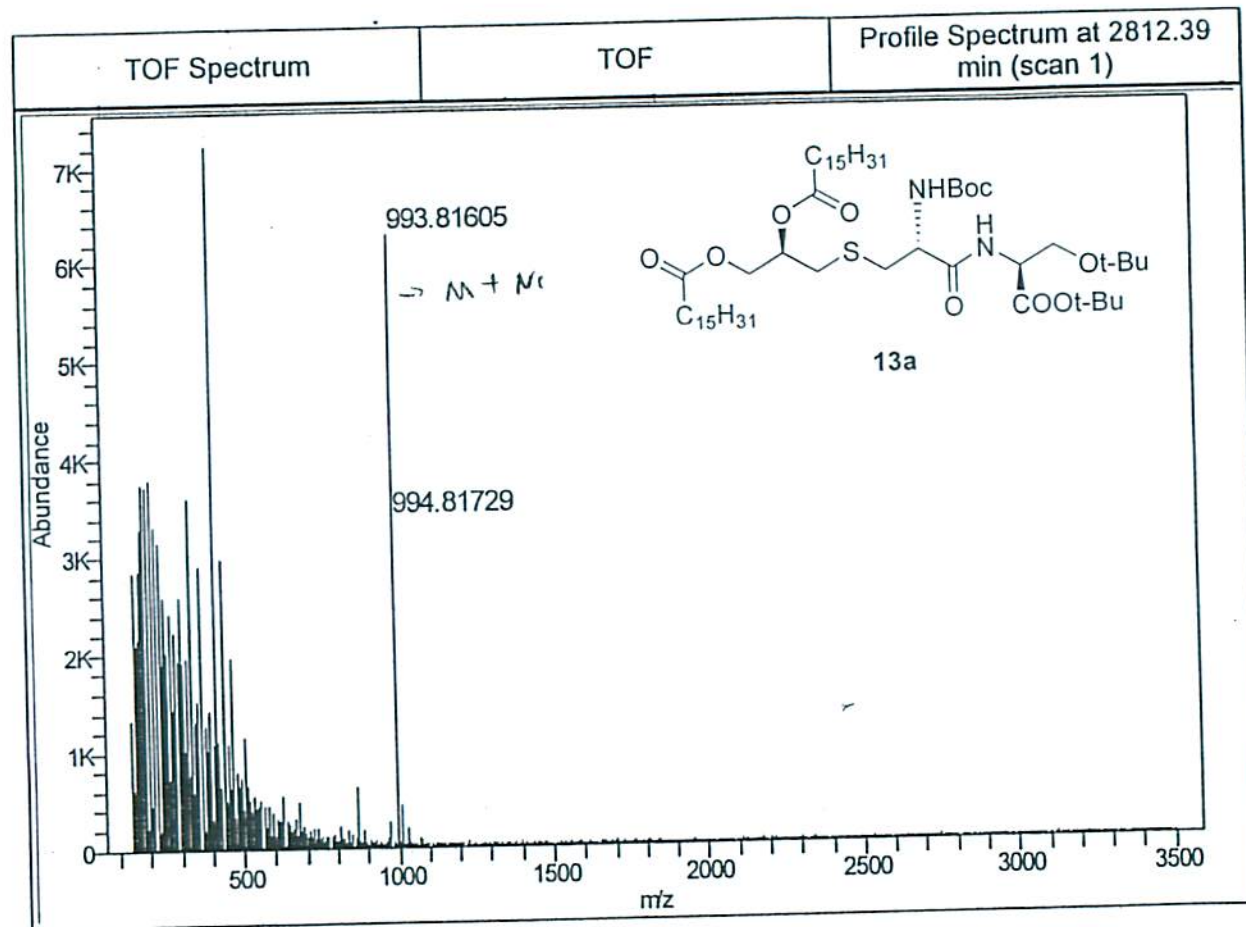



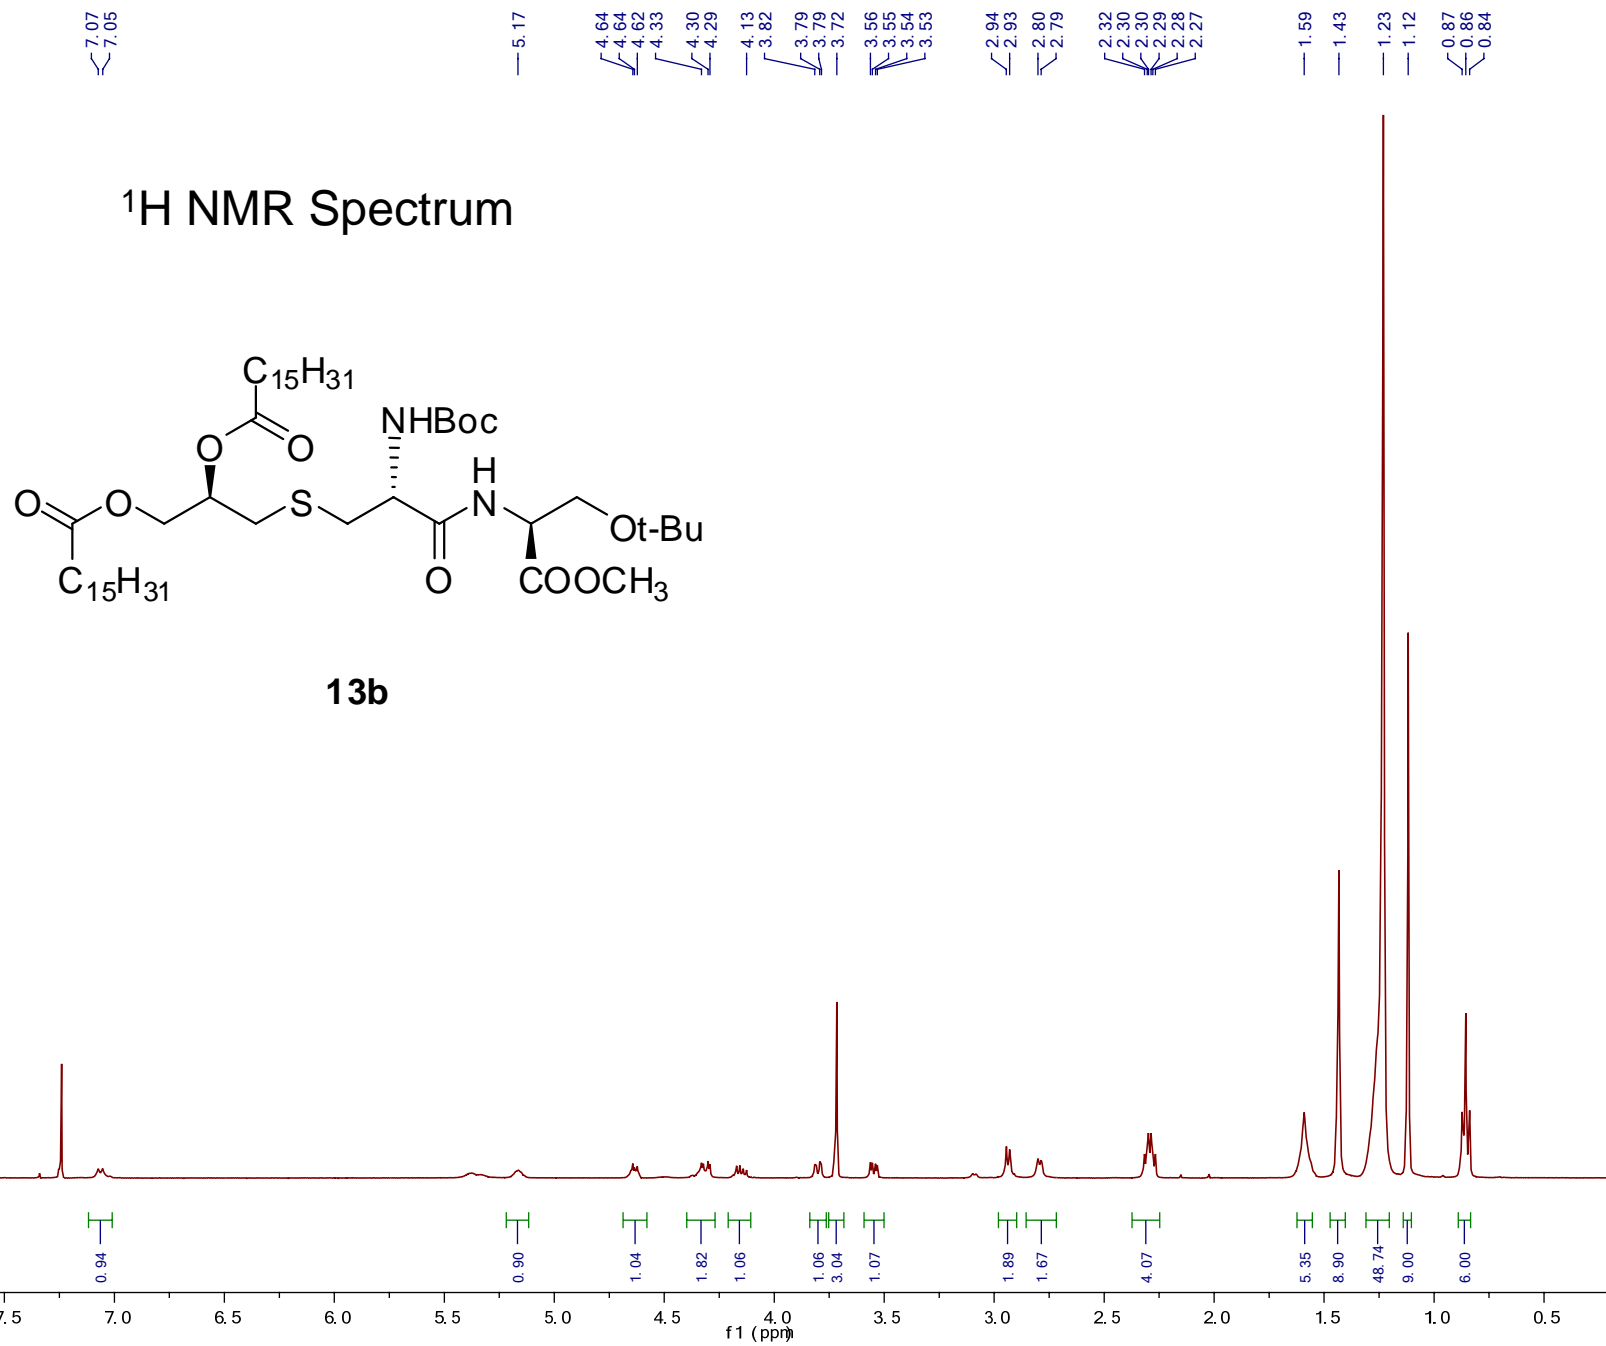

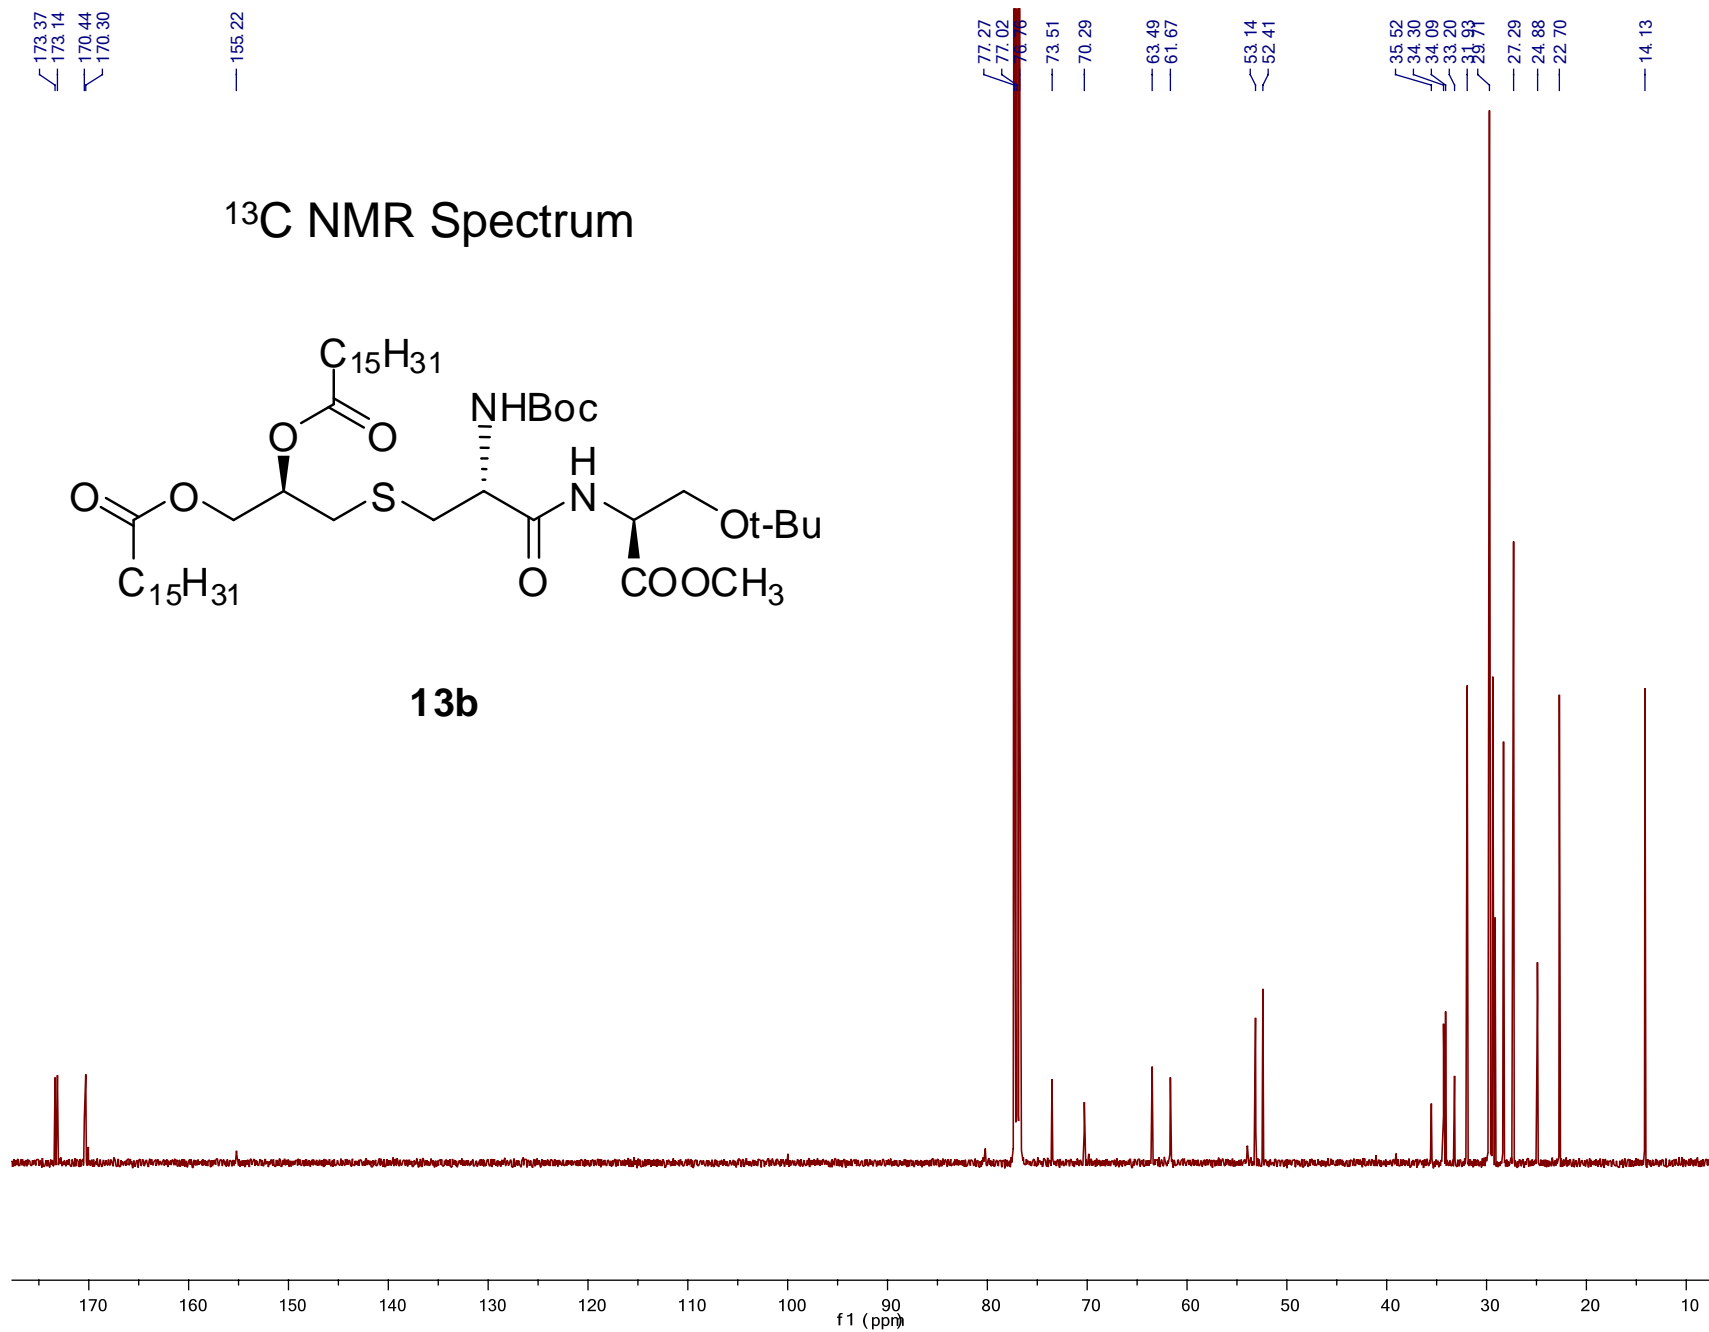

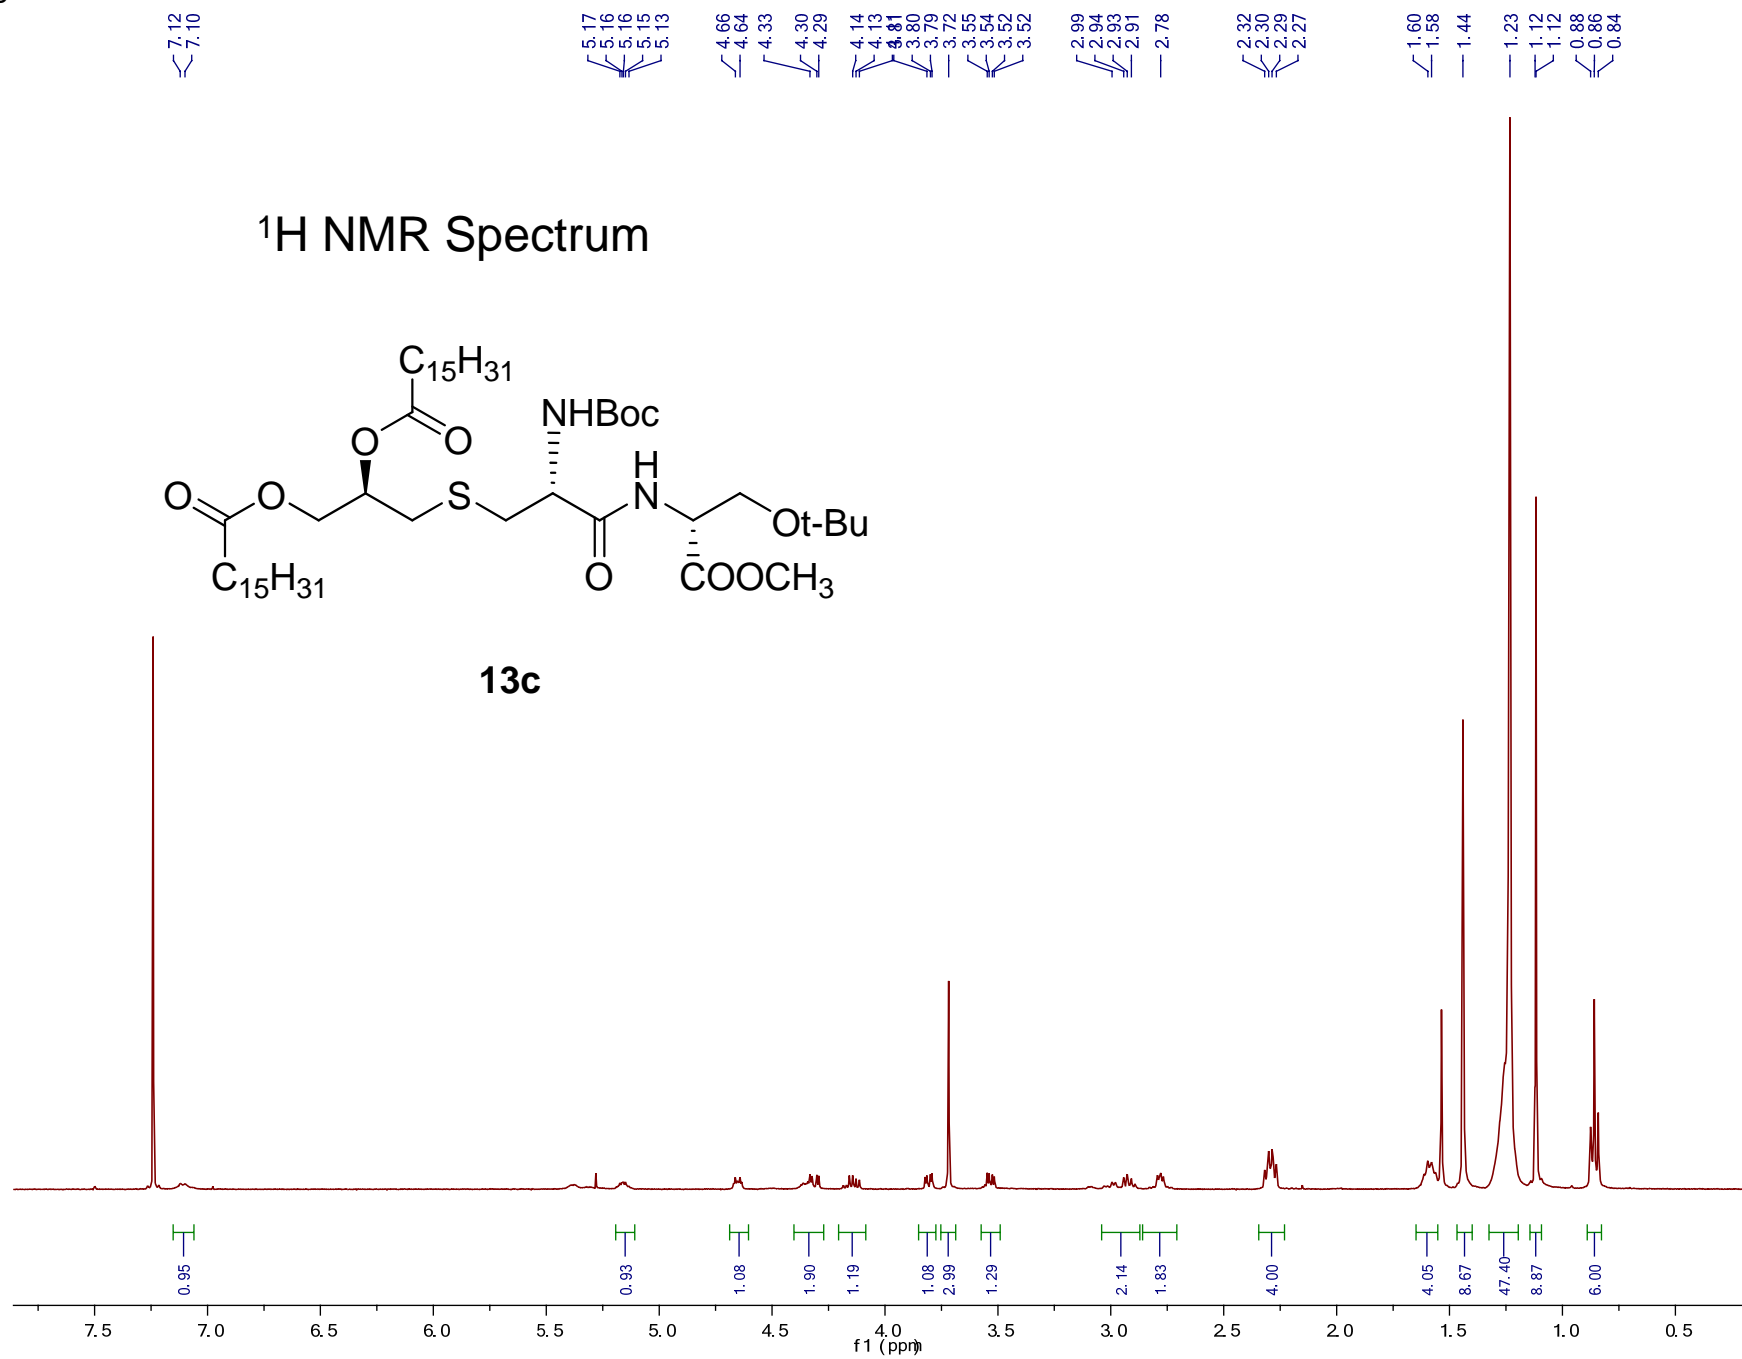

173.76  
172.68  
171.22  
170.29

### $^{13}\text{C}$ NMR Spectrum

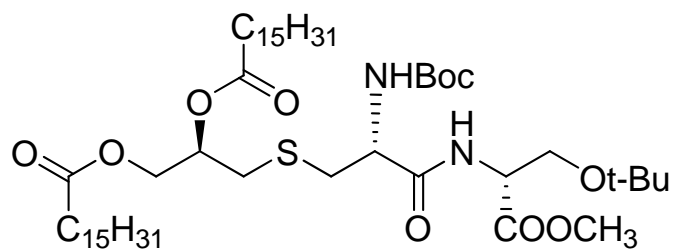

**13c**

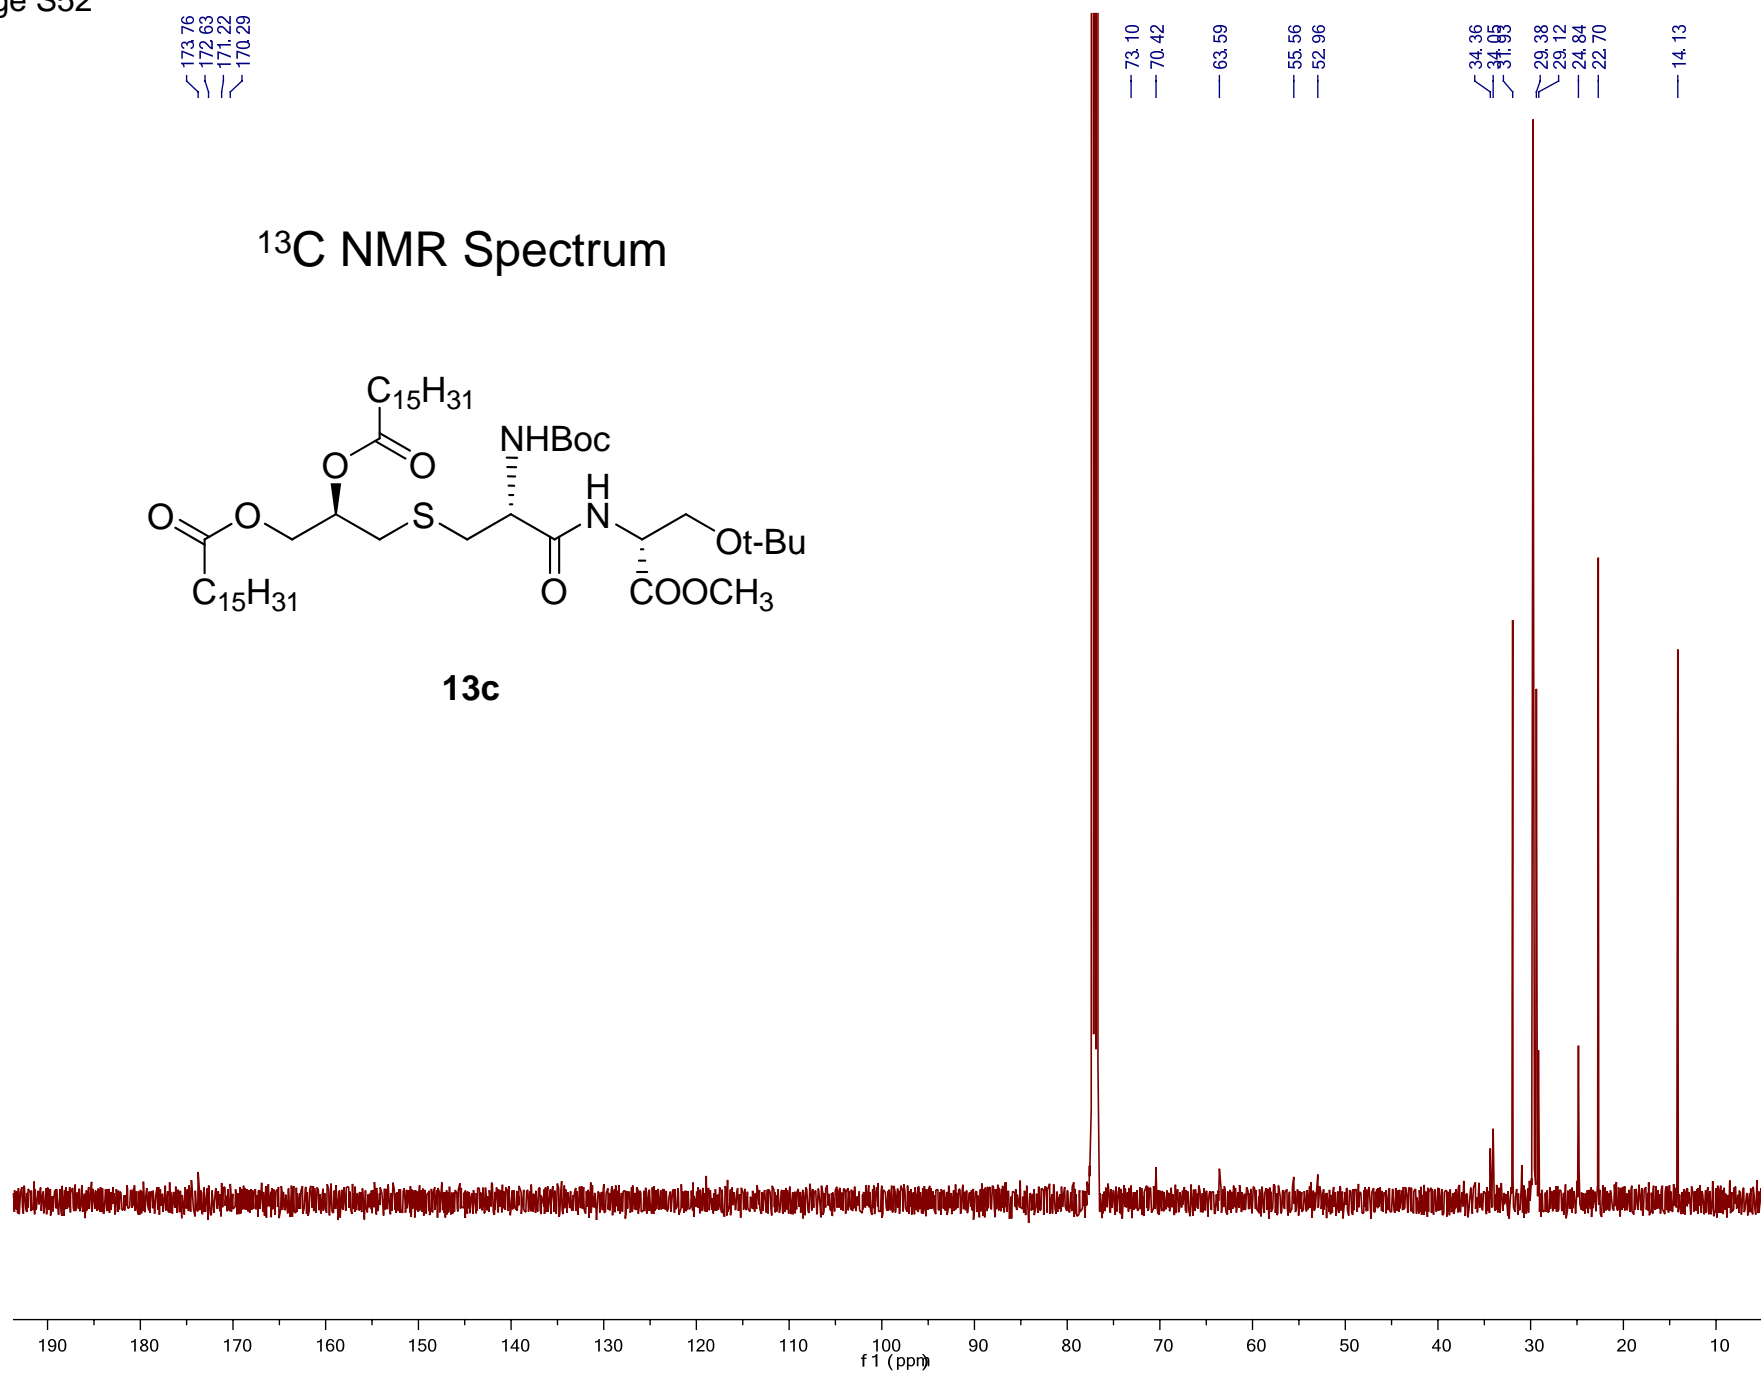

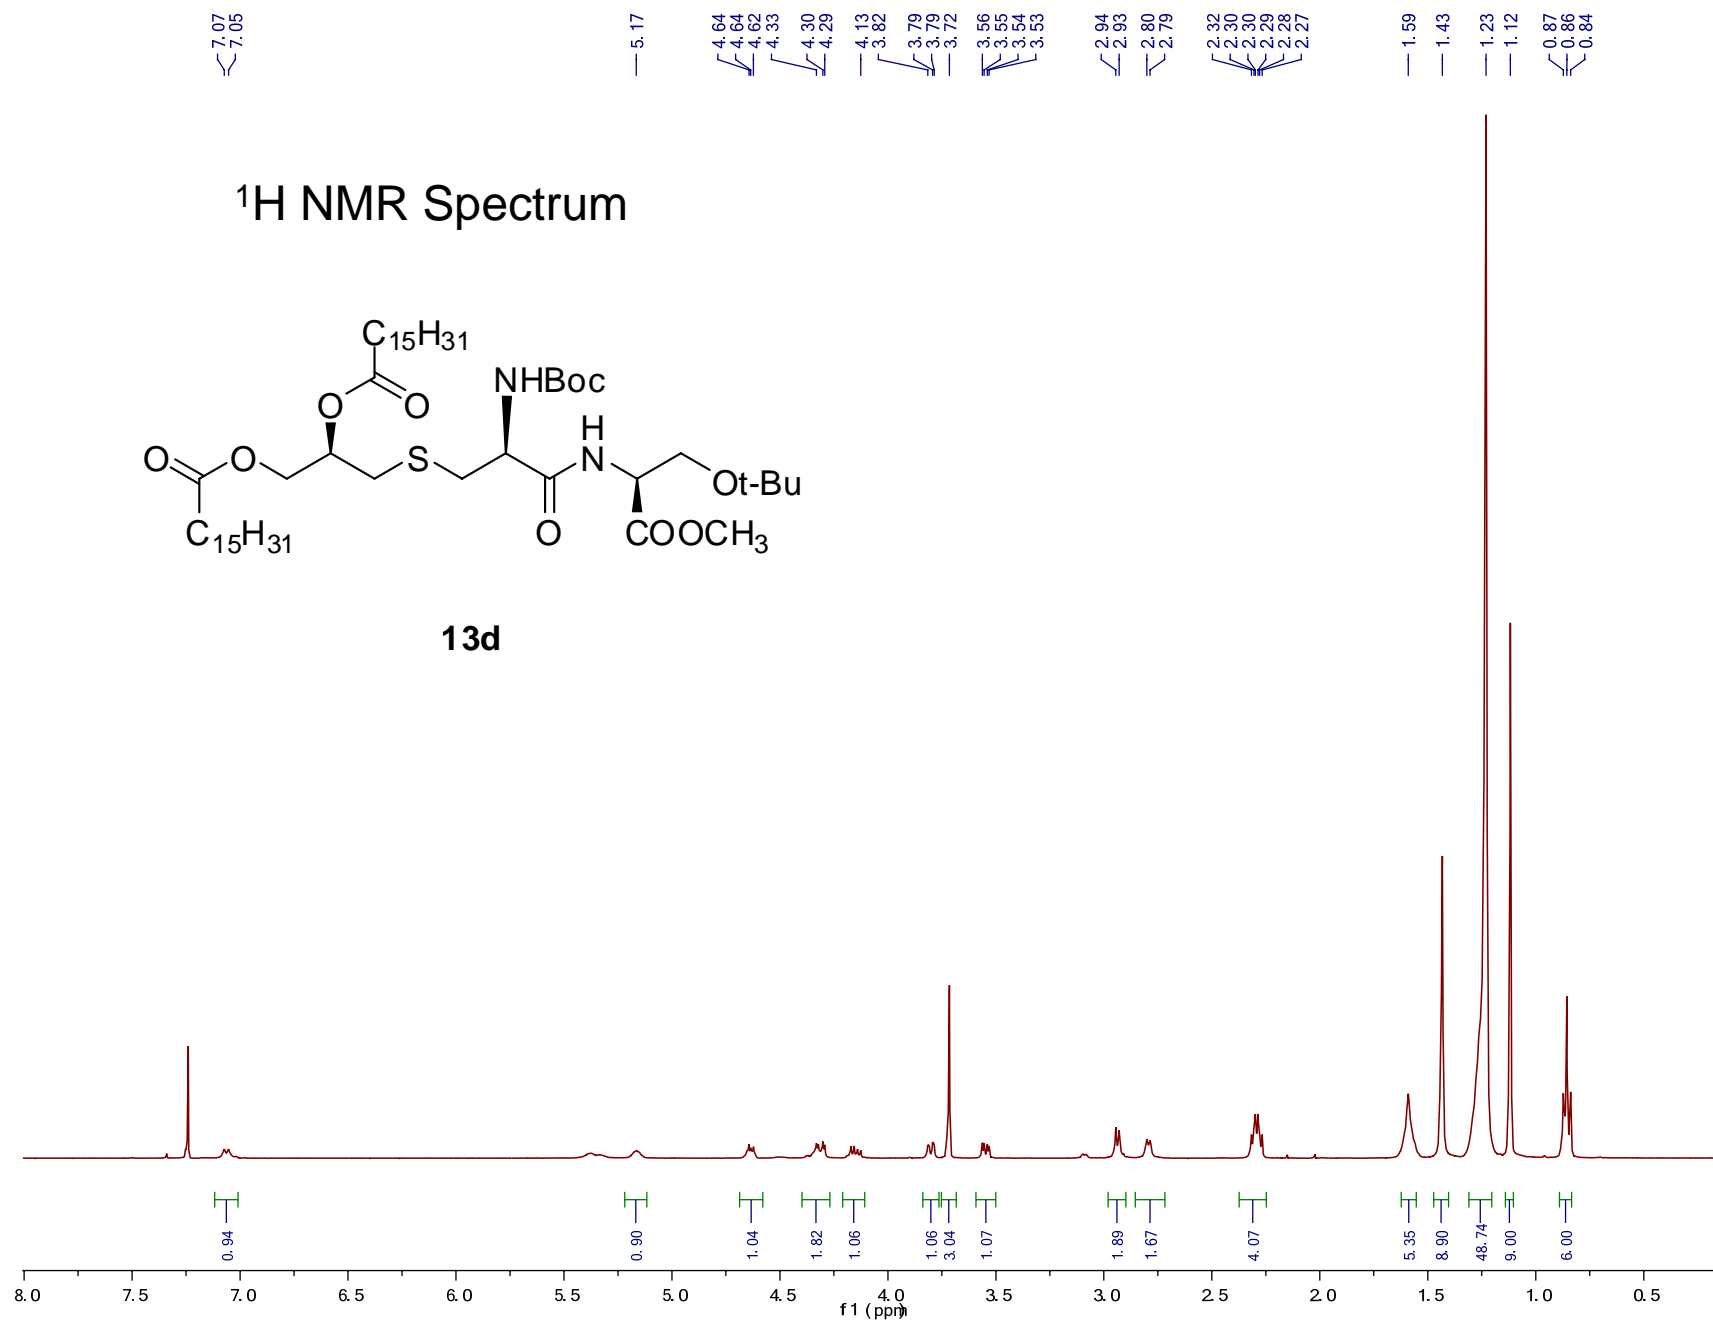

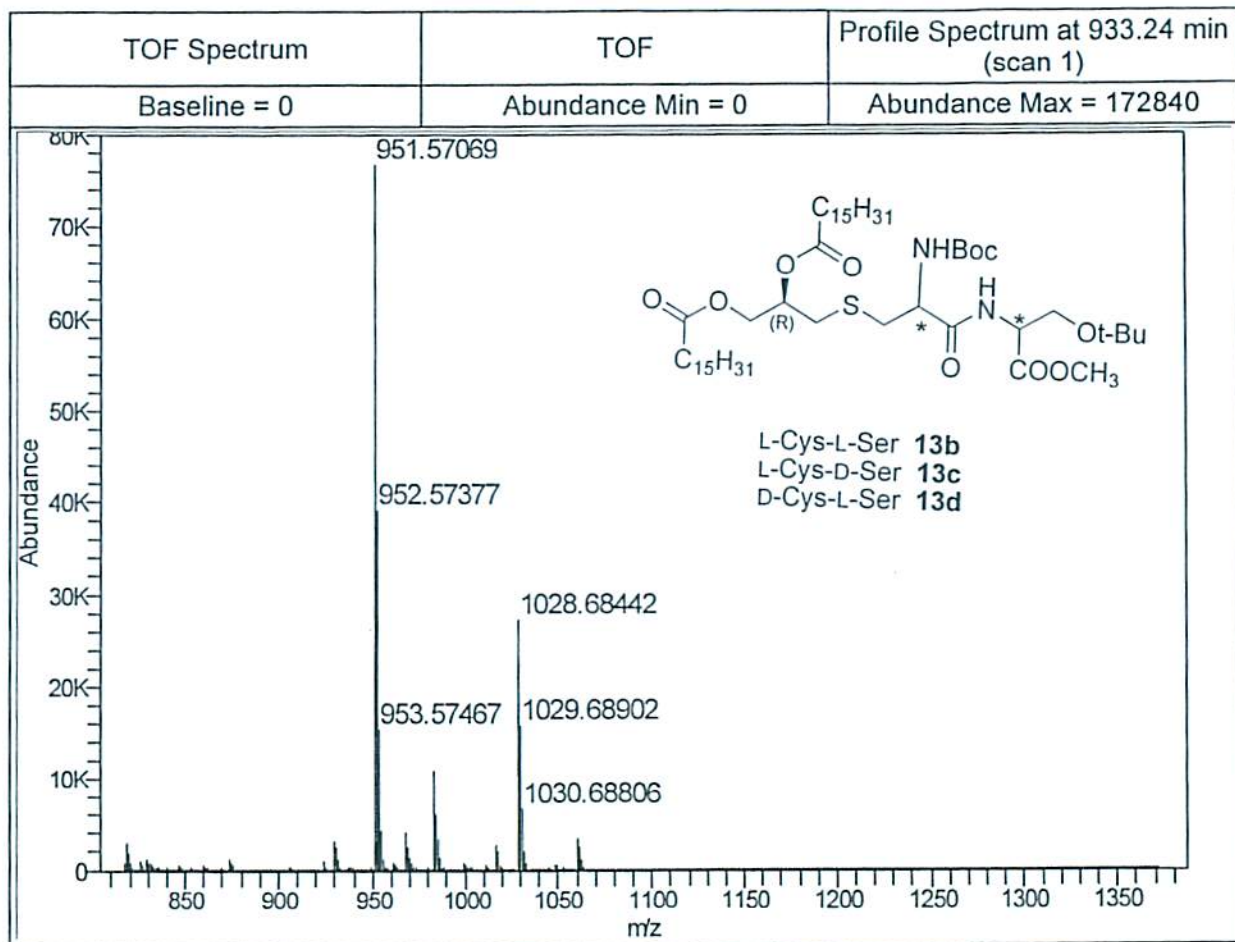

9.11  
9.09  
8.83  
8.81

8.23

5.17  
5.15  
4.69  
4.64  
4.63  
4.61  
4.40  
4.30  
4.26  
4.12  
3.99  
3.78  
3.77  
3.66  
3.64  
3.07  
3.06  
2.89  
2.81  
2.77  
2.73  
2.66  
2.27  
2.26  
2.24  
2.19  
2.15  
1.50  
1.49  
1.47  
1.22  
0.86  
0.84  
0.83

# $^1\text{H}$ NMR Spectrum

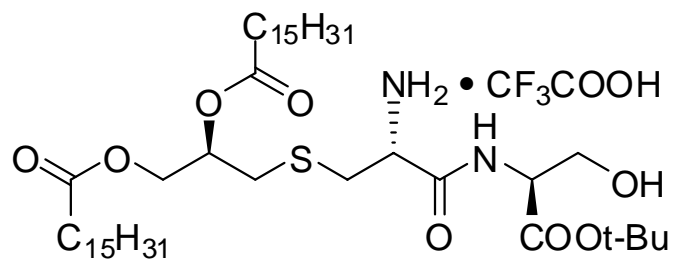

**14a**

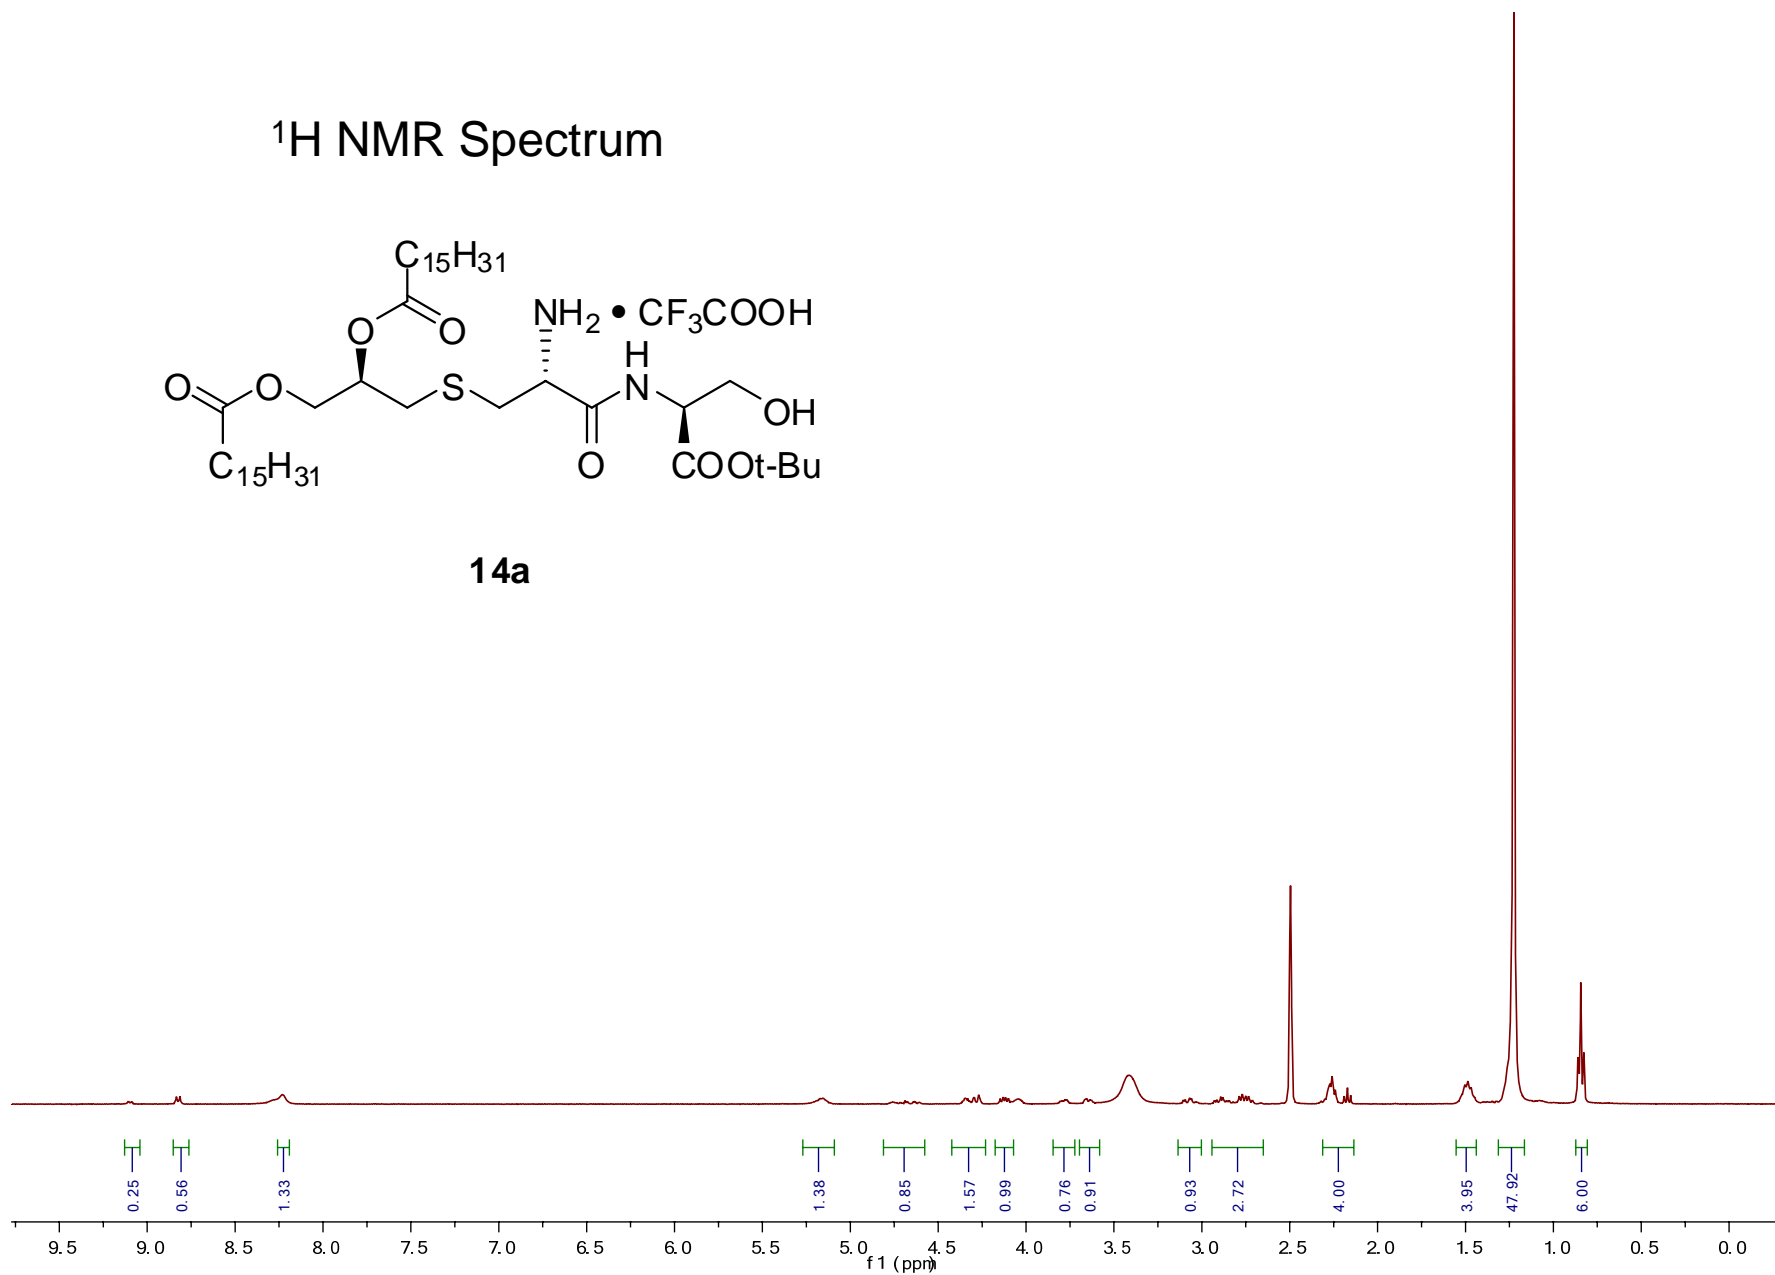

179.71  
177.74  
177.51  
176.39

74.88  
68.75  
66.29  
60.03  
56.60  
38.87  
38.78  
38.61  
38.23  
36.53  
33.95  
29.71  
29.62  
27.32  
19.16

### <sup>13</sup>C NMR Spectrum

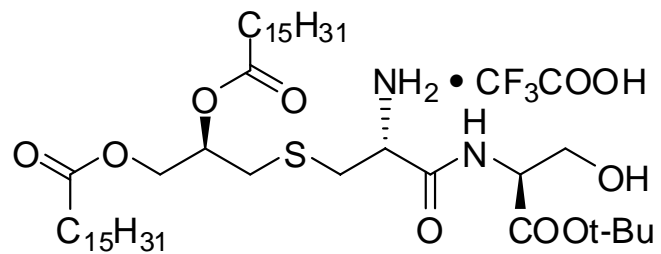

**14a**

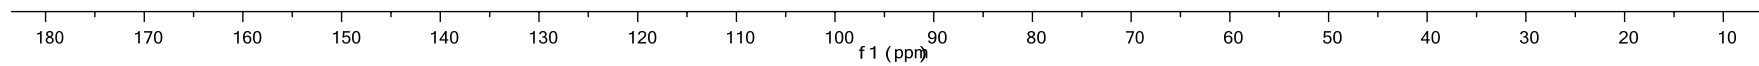



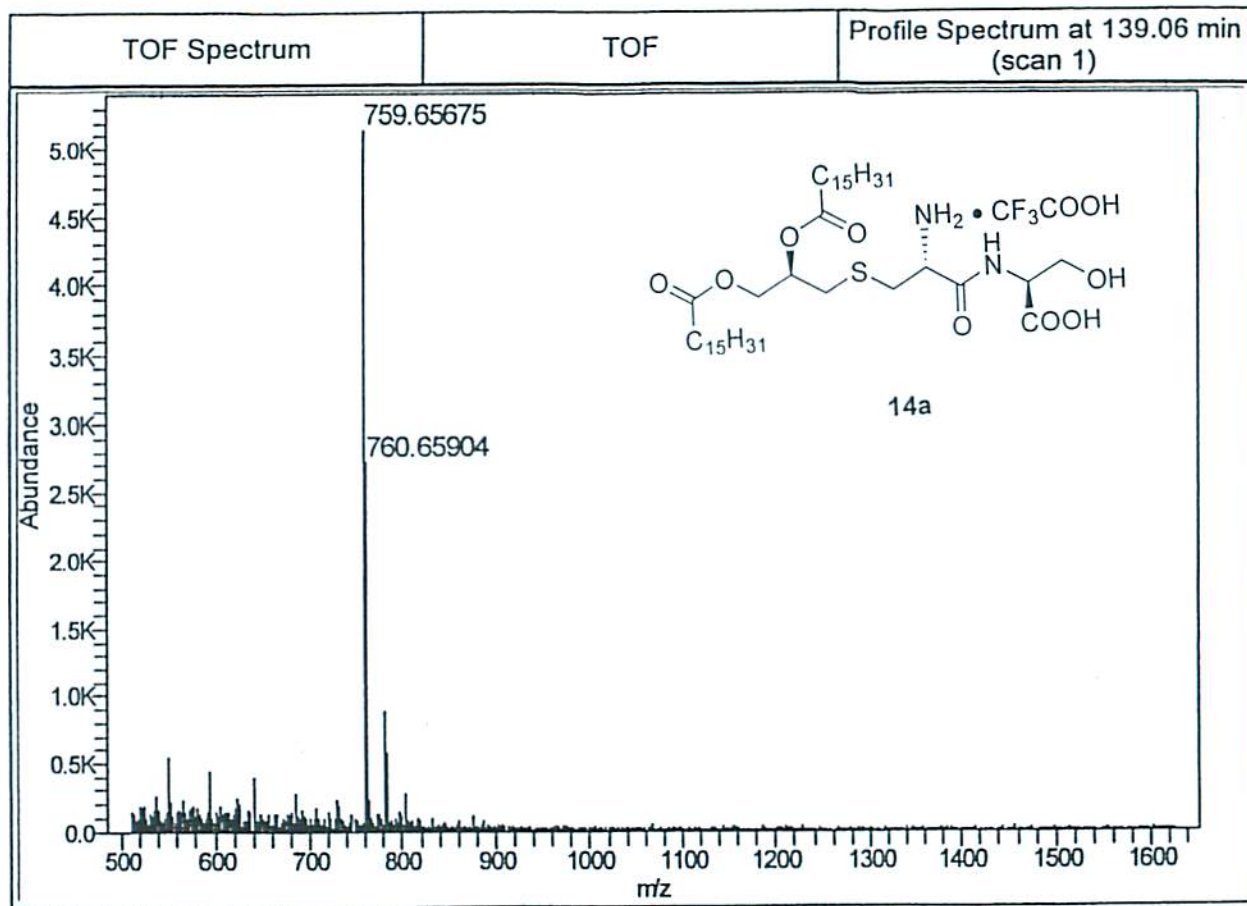

— 8.21

— 5.28

— 5.14

— 4.69

— 4.40

— 4.32

— 4.30

— 4.09

— 3.96

— 3.74

— 3.16

— 3.02

— 2.91

— 2.75

— 2.31

— 2.28

— 2.28

— 1.57

— 1.23

— 0.87

— 0.86

— 0.84

# <sup>1</sup>H NMR Spectrum

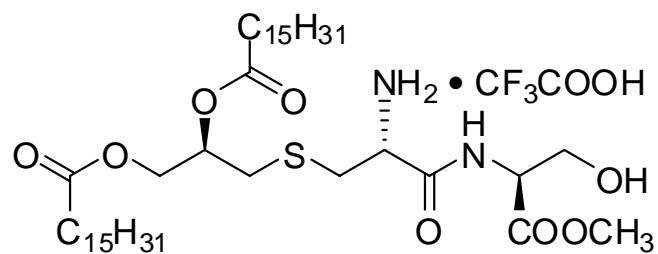**14b**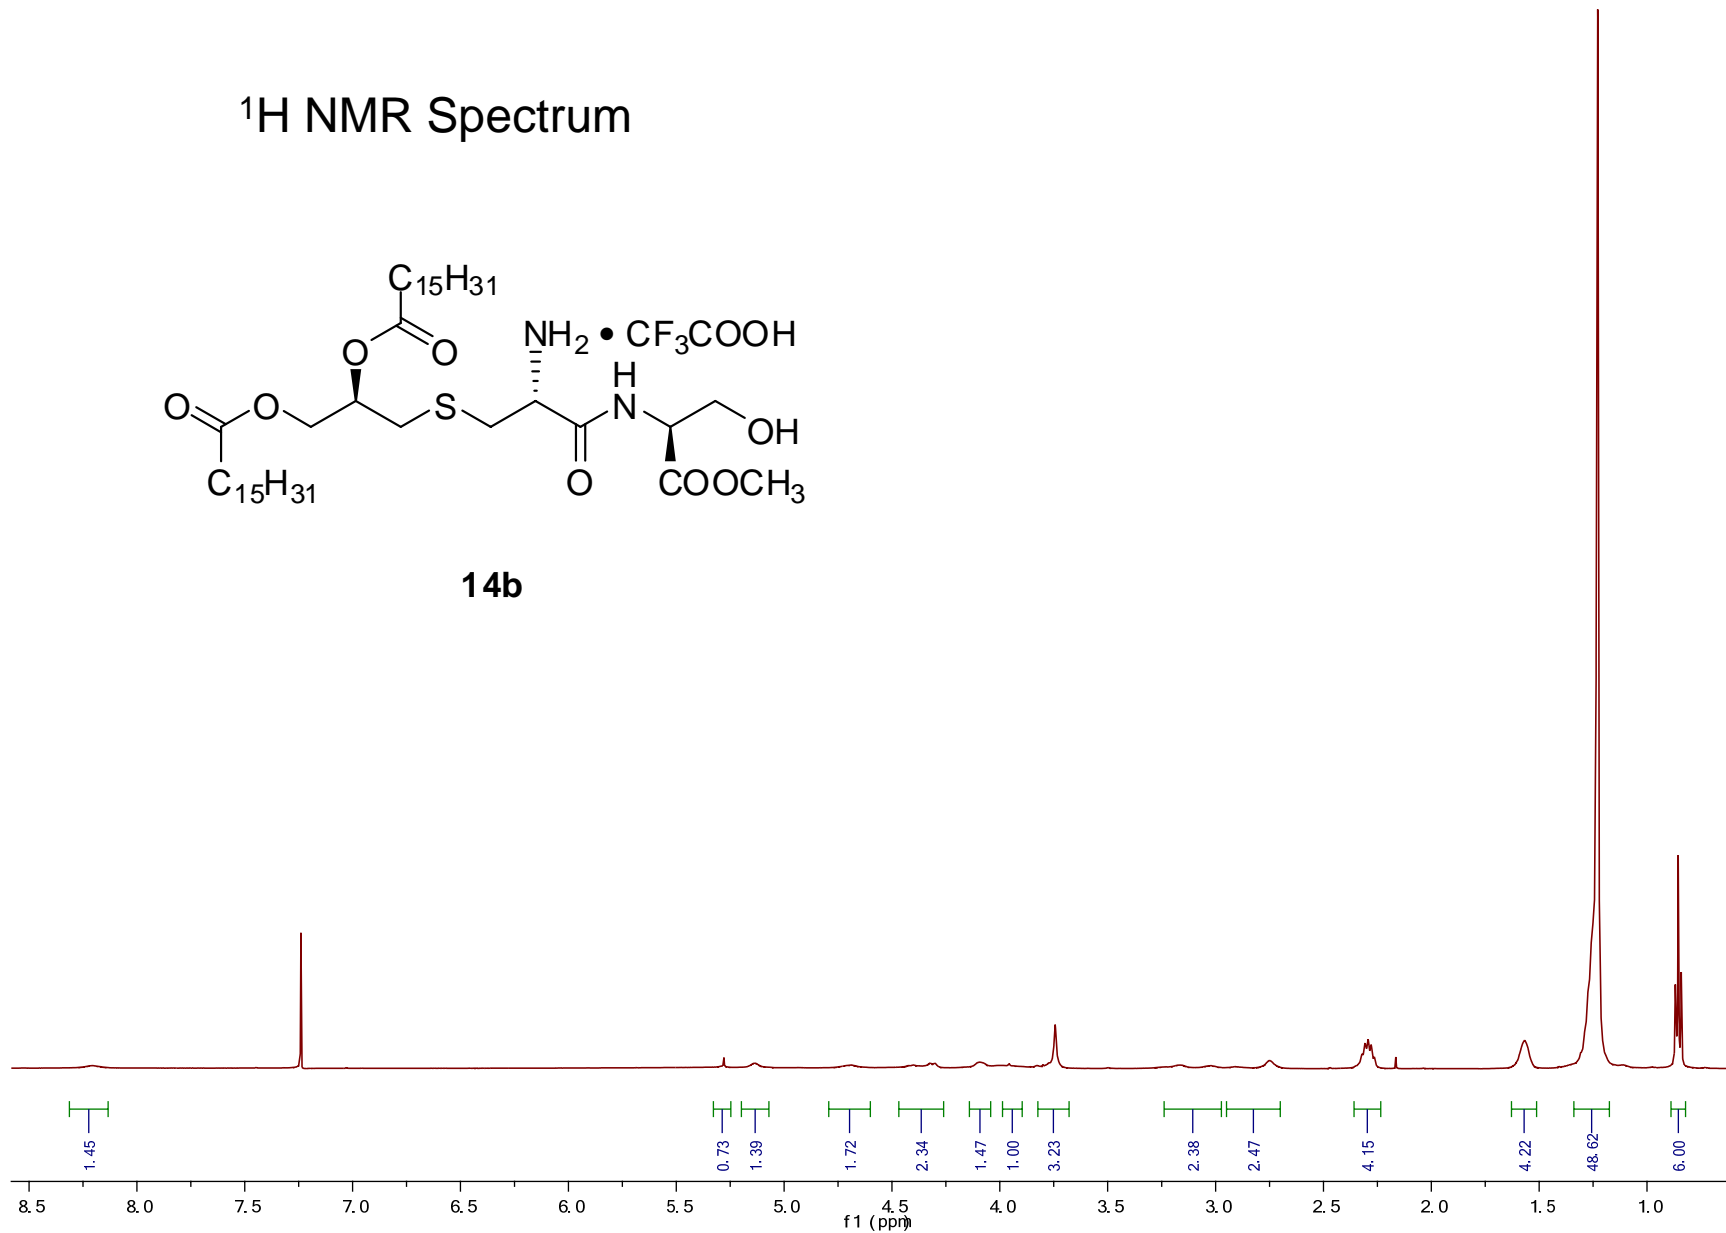

174.39  
173.97  
169.90

### $^{13}\text{C}$ NMR Spectrum

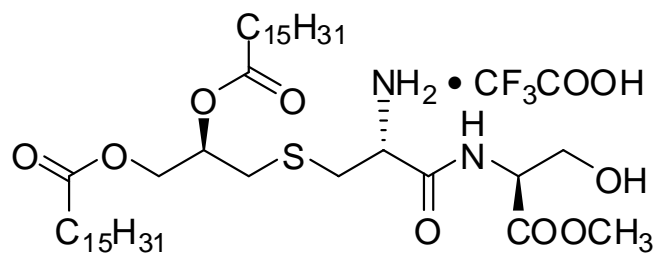

**14b**

70.27  
70.08

63.65  
63.52  
61.90

52.92

34.32  
34.05  
31.93

29.53  
24.86  
24.82  
22.70

14.12

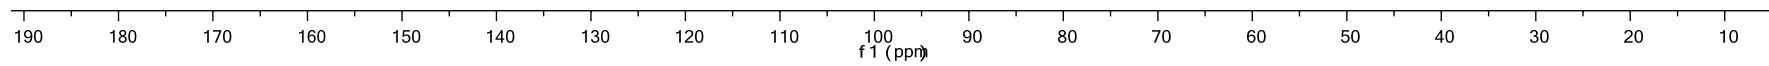

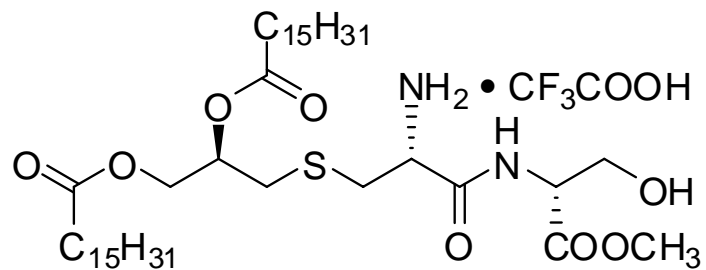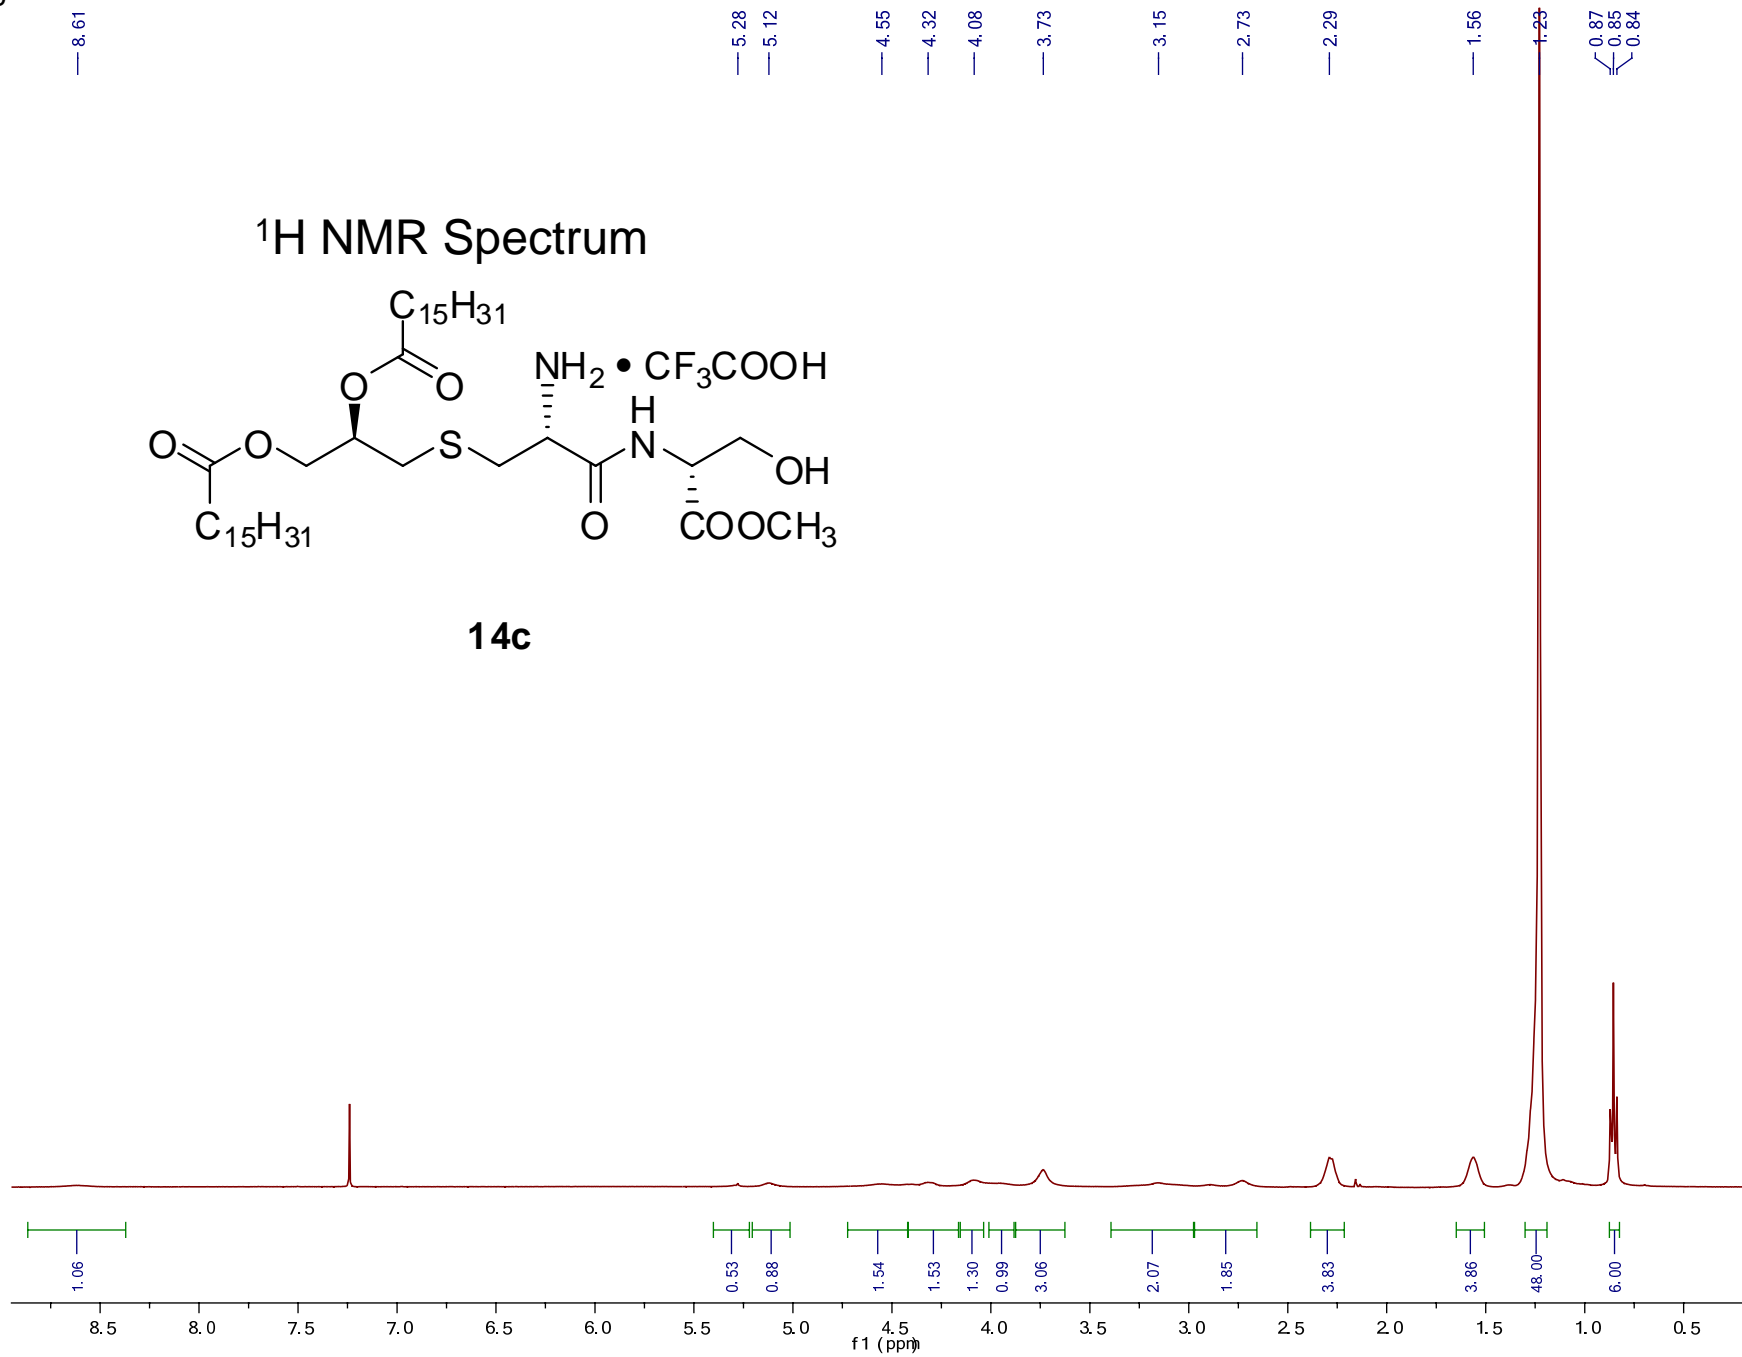



— 8.74

— 7.87

— 5.32

— 5.13

— 4.56

— 4.36

— 4.13

— 3.99

— 3.78

— 3.23

— 2.78

— 2.33

— 1.61

— 1.27

— 0.91

— 0.89

— 0.88

# $^1\text{H}$ NMR Spectrum

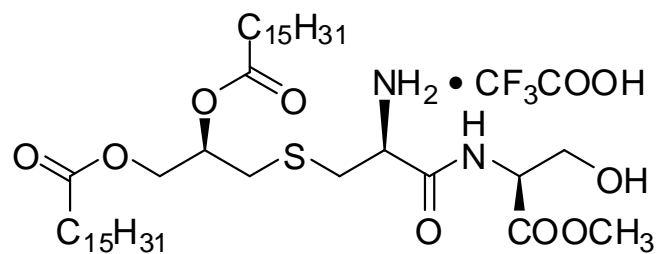**14d**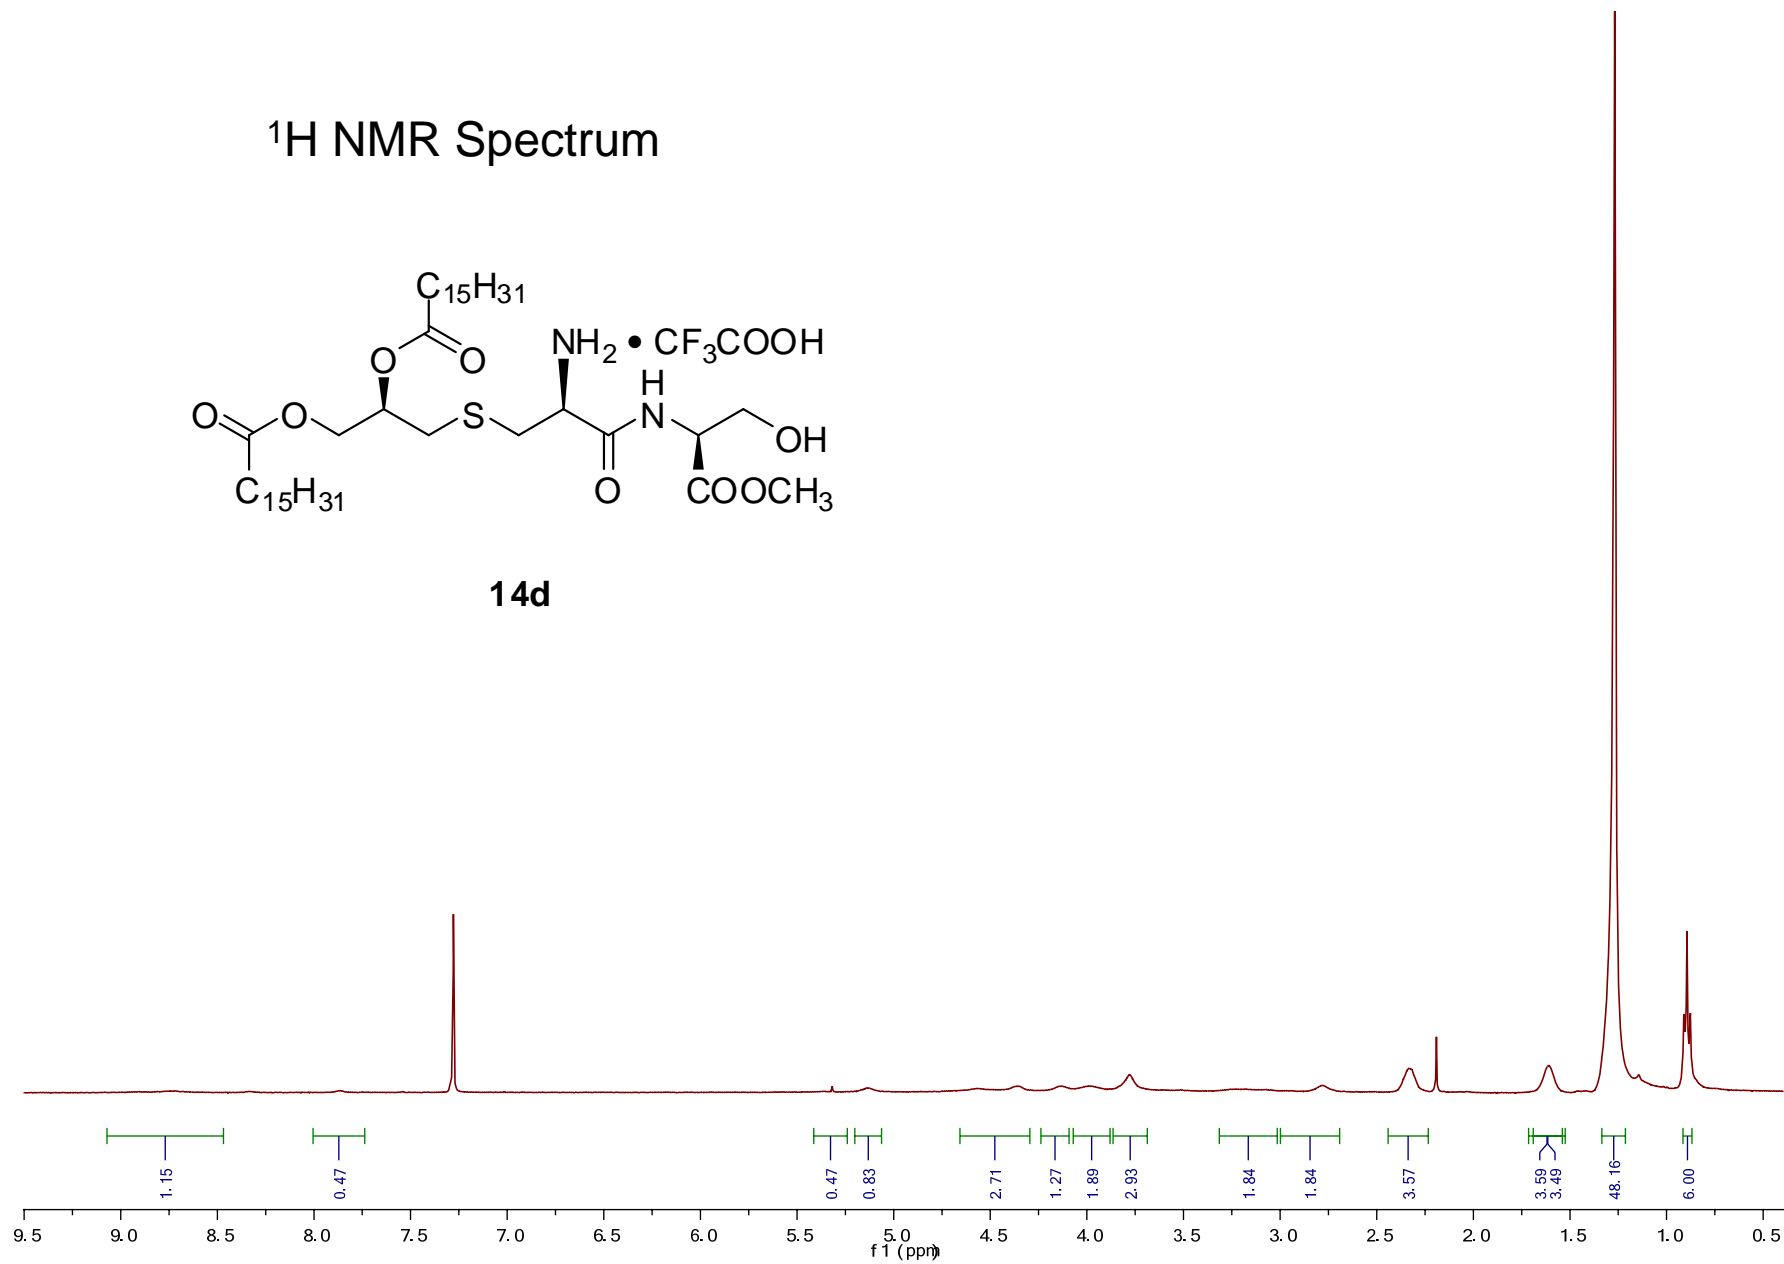

174.49  
173.76 $^{13}\text{C}$  NMR Spectrum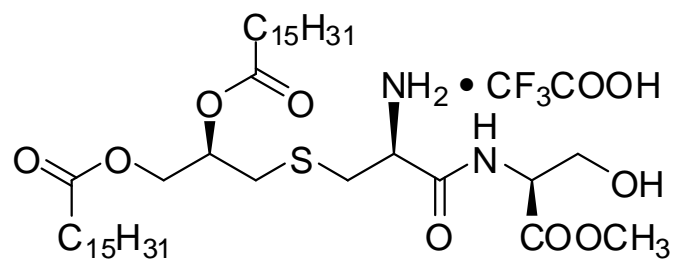

14d

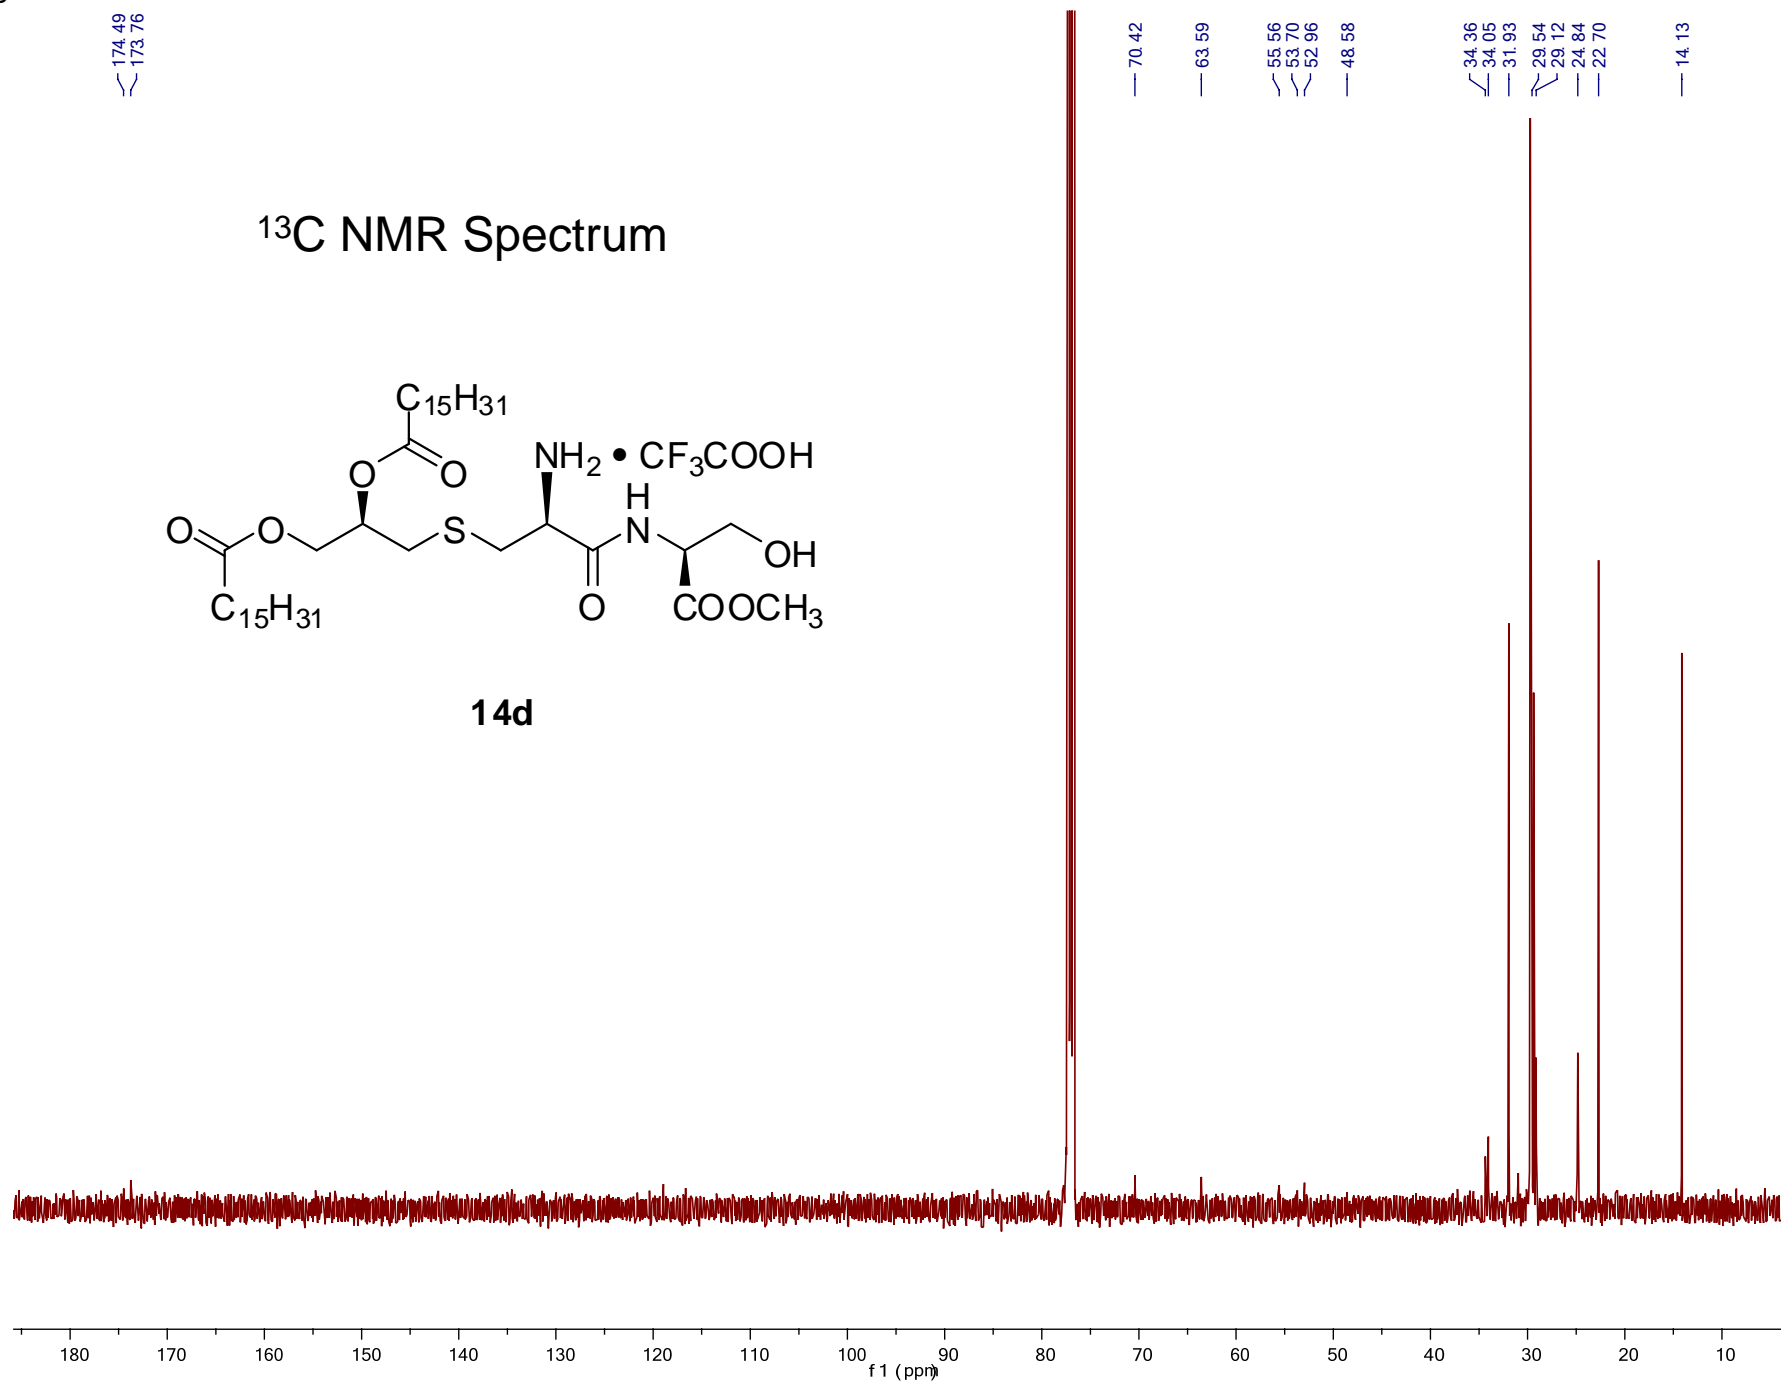

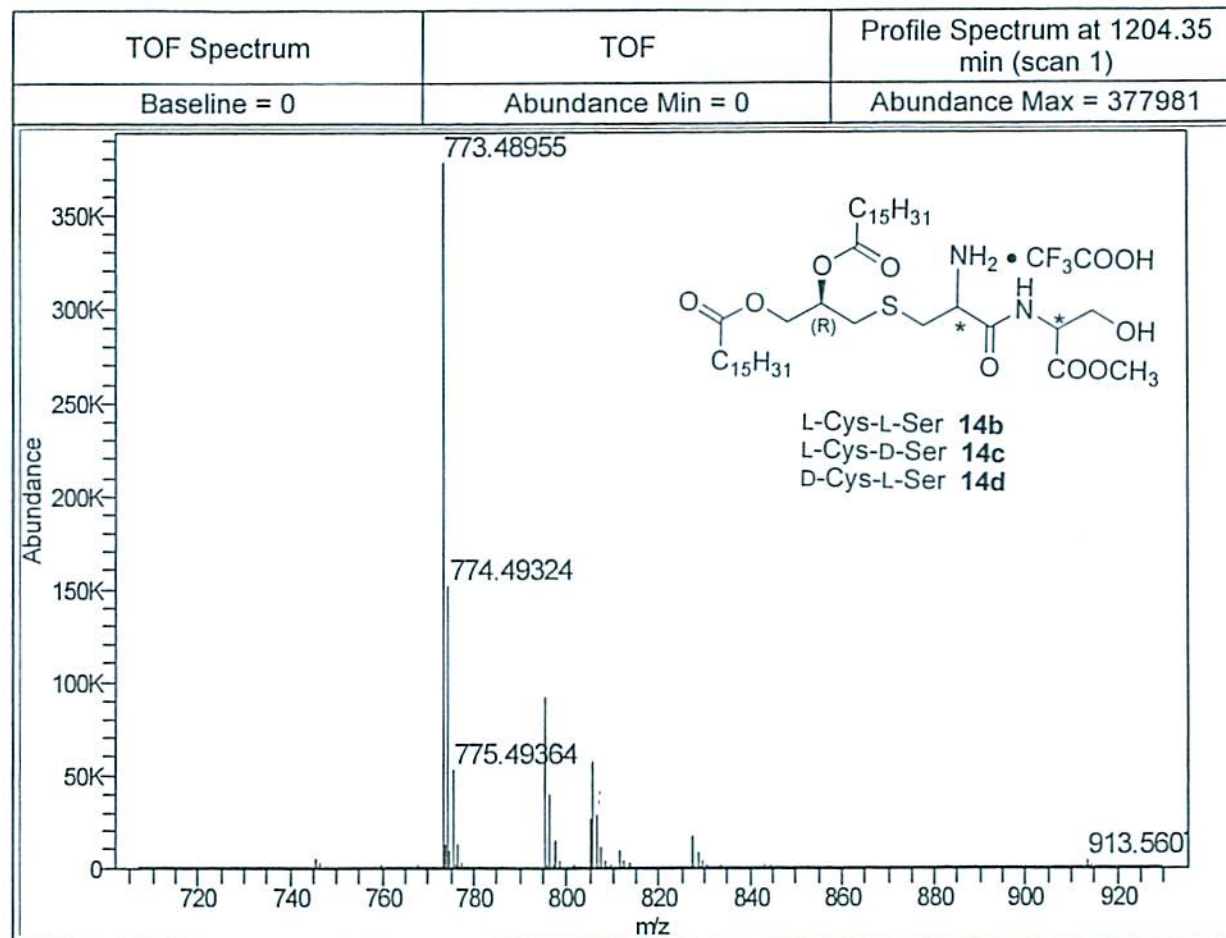



4.34  
4.33  
4.32  
4.31  
4.30  
4.29  
4.28  
4.27  
4.26  
4.25  
4.24  
4.24  
4.22  
4.07  
4.05  
4.05  
4.03  
3.84  
3.76  
3.74  
3.72  
3.61  
3.59  
3.57  
3.56  
3.54  
3.53

3.18  
3.16  
3.14  
3.13

1.44  
1.37  
1.35  
1.33  
1.33  
1.31  
1.27

# <sup>1</sup>H NMR Spectrum

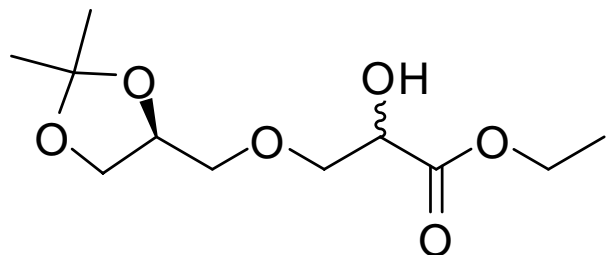

**15**

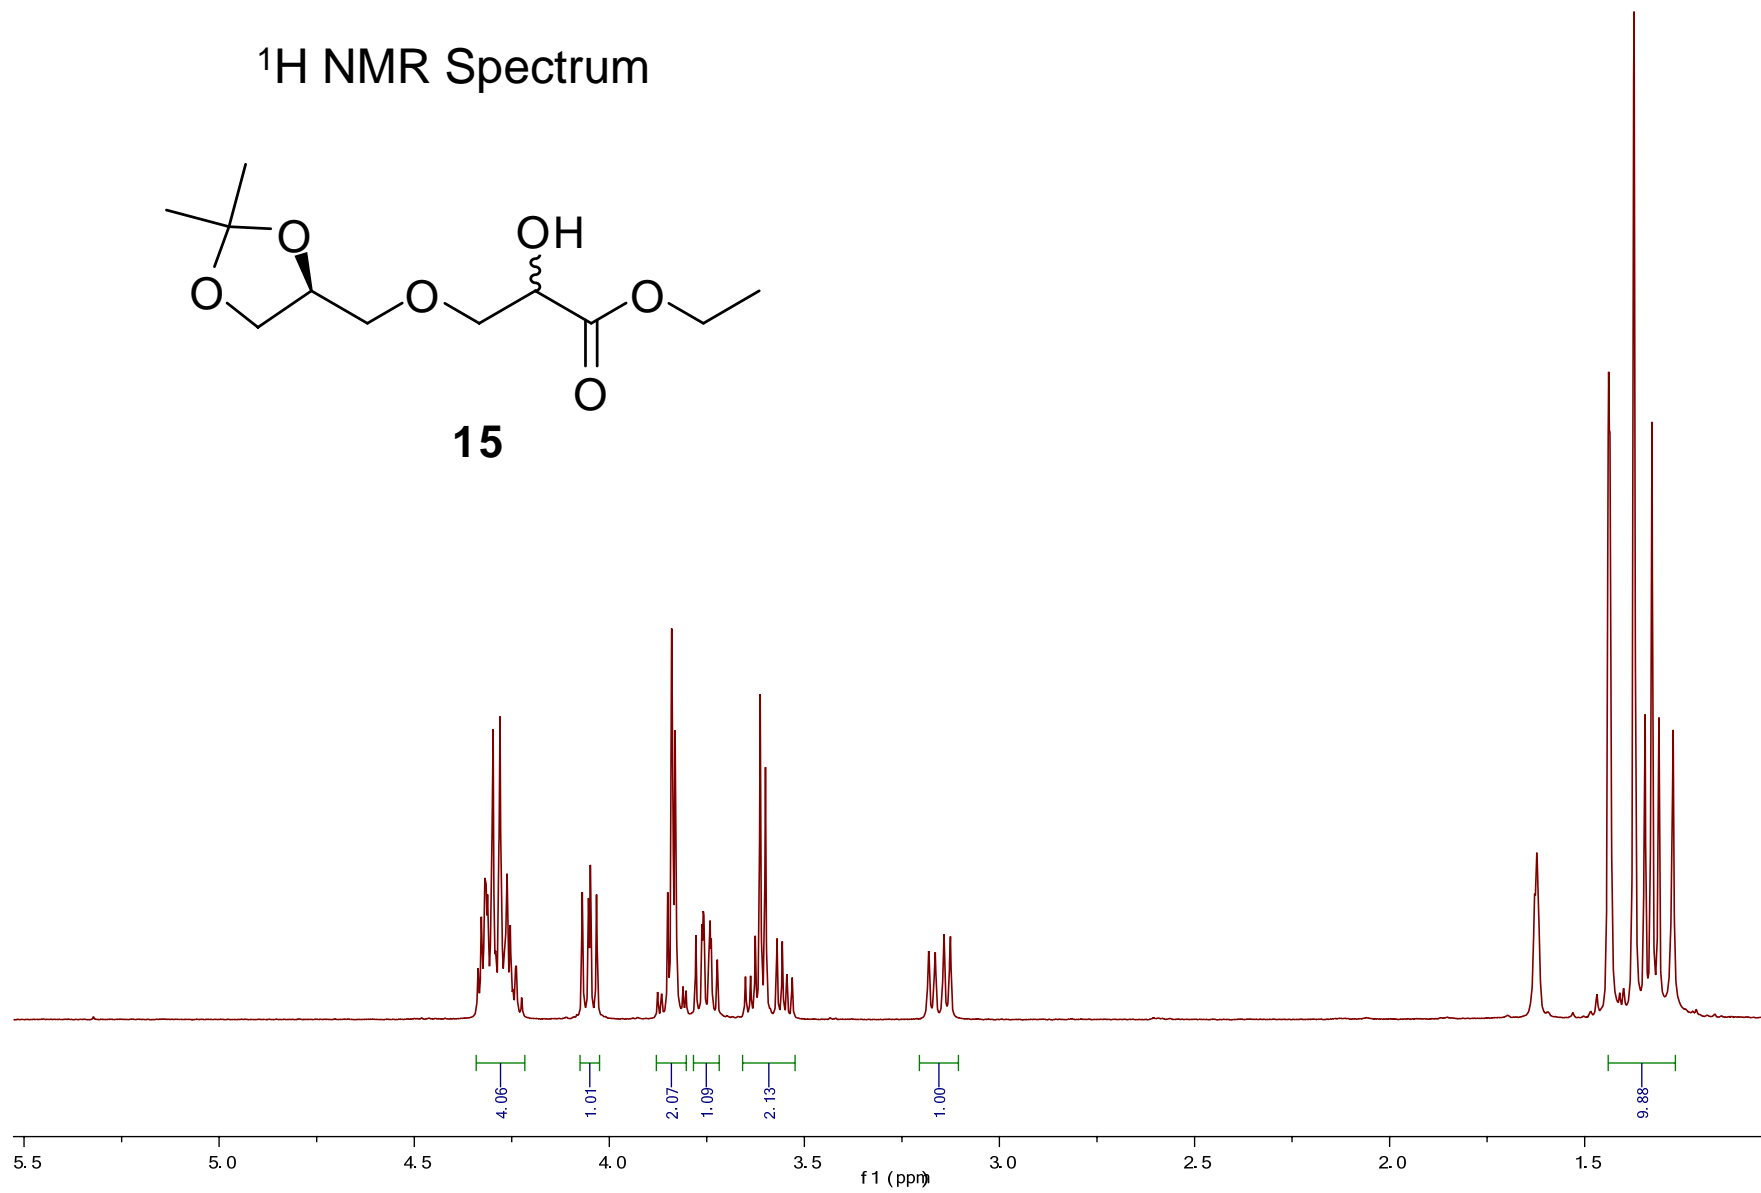

171.49  
171.44

108.42

73.59  
73.55  
72.11  
71.56  
69.95  
69.85  
65.57  
65.54  
60.85

28.68  
25.68  
24.37  
24.33

13.17

### <sup>13</sup>C NMR Spectrum

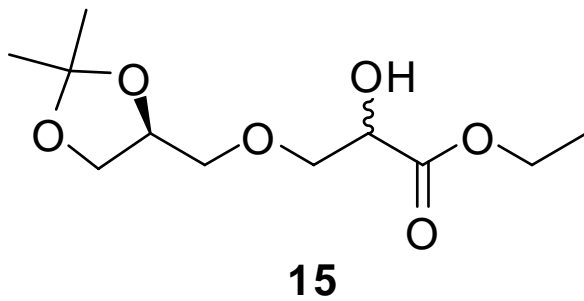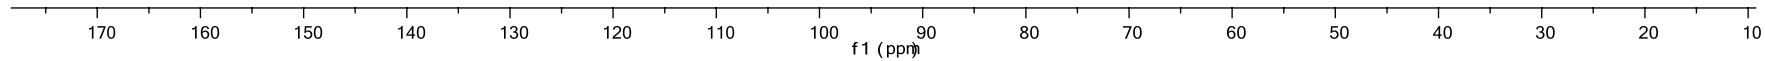

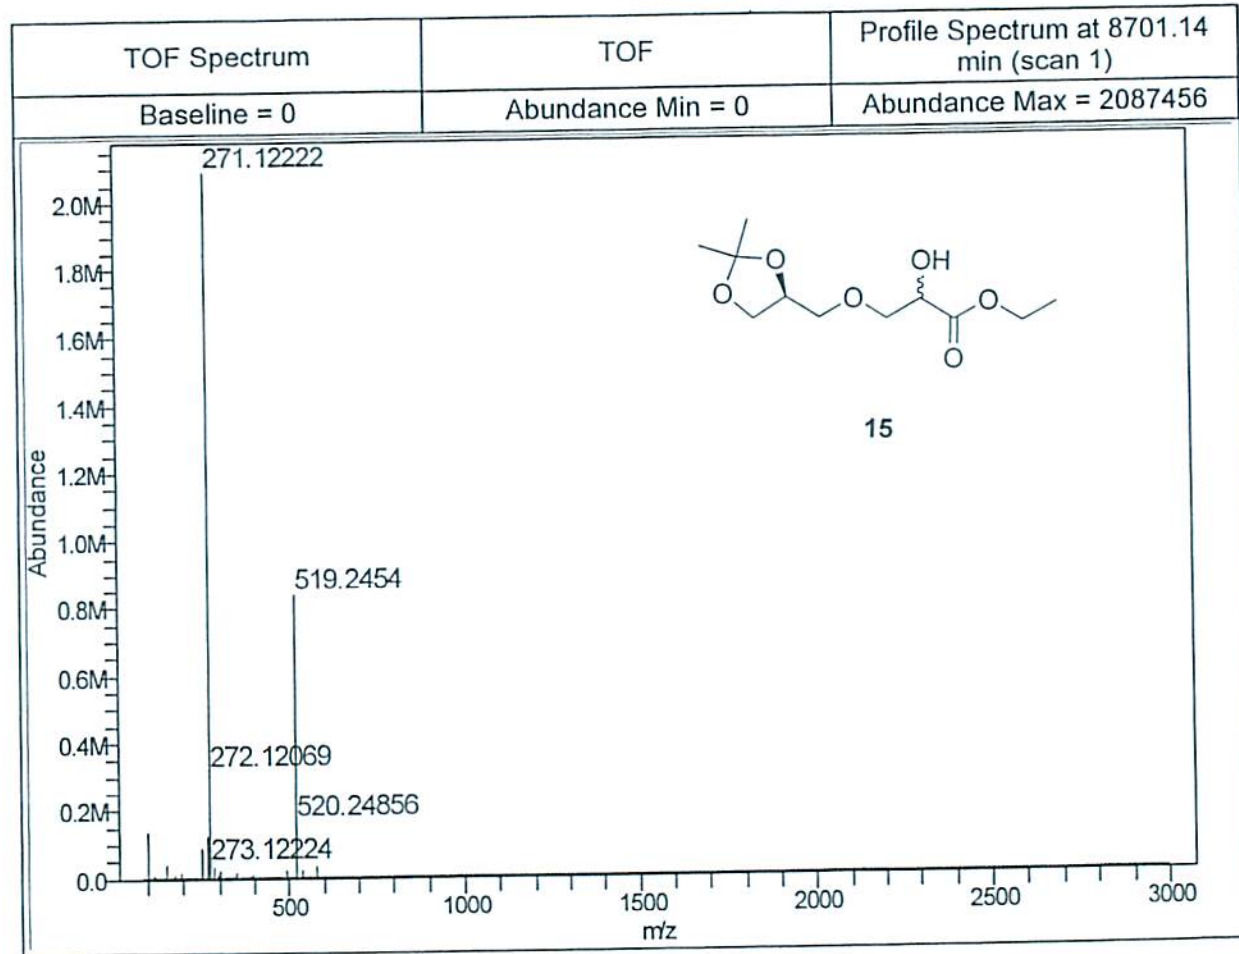

7.81  
7.797.32  
7.305.01  
5.00  
5.00  
4.99  
4.974.13  
4.11  
4.10  
4.09  
4.08  
4.073.88  
3.79

3.62

3.53  
3.51  
3.49  
3.47  
3.46  
3.44  
3.41  
3.39

2.42

1.60

1.35  
1.31  
1.21  
1.19  
1.17 $^1\text{H}$  NMR Spectrum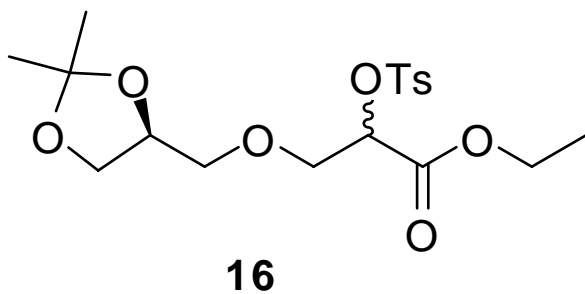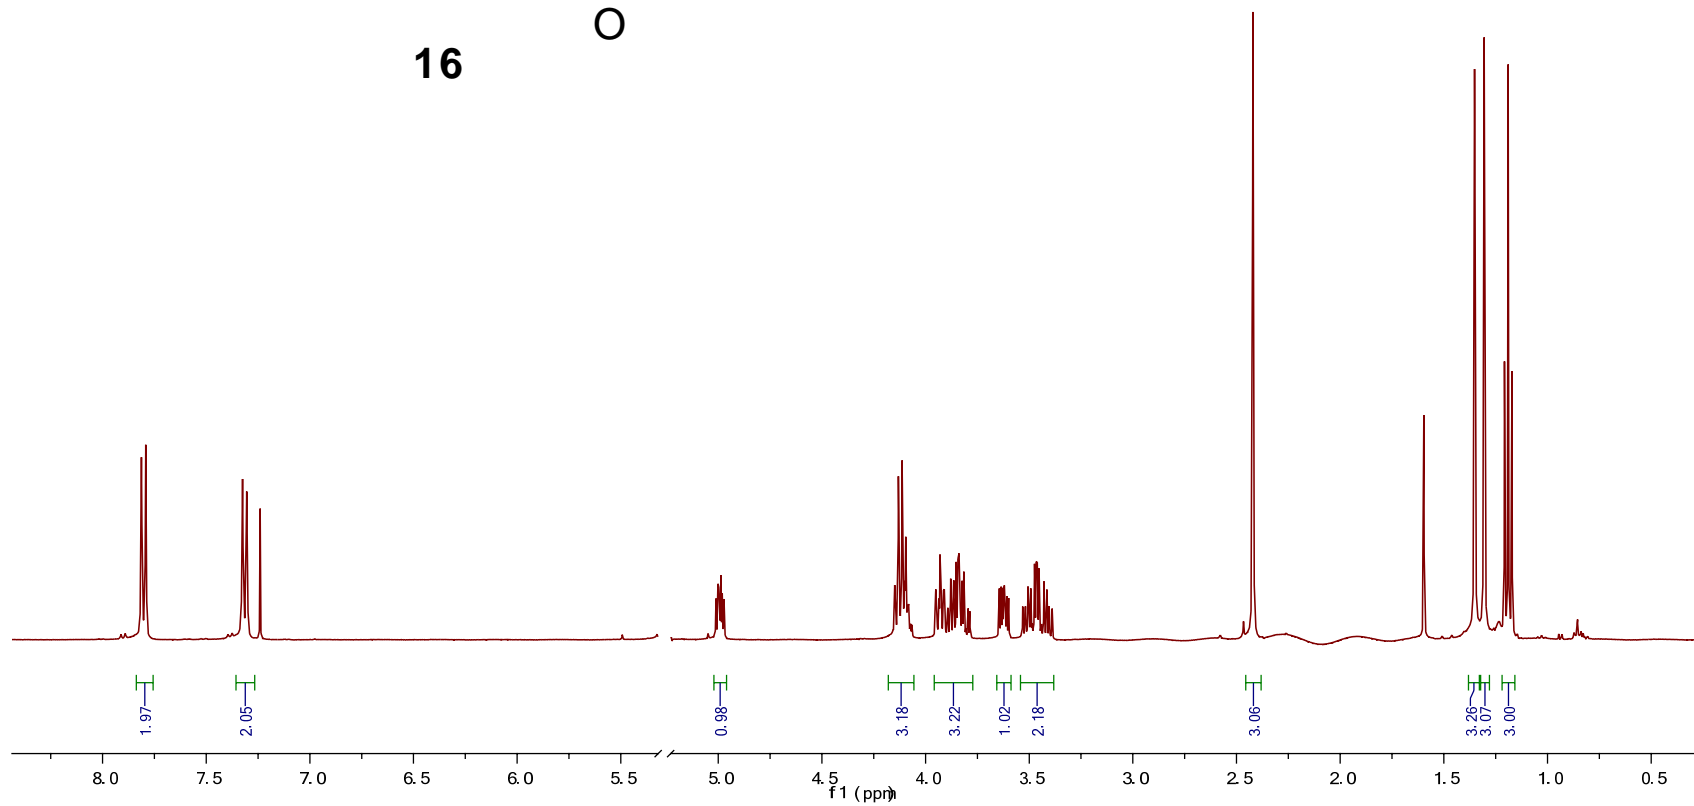

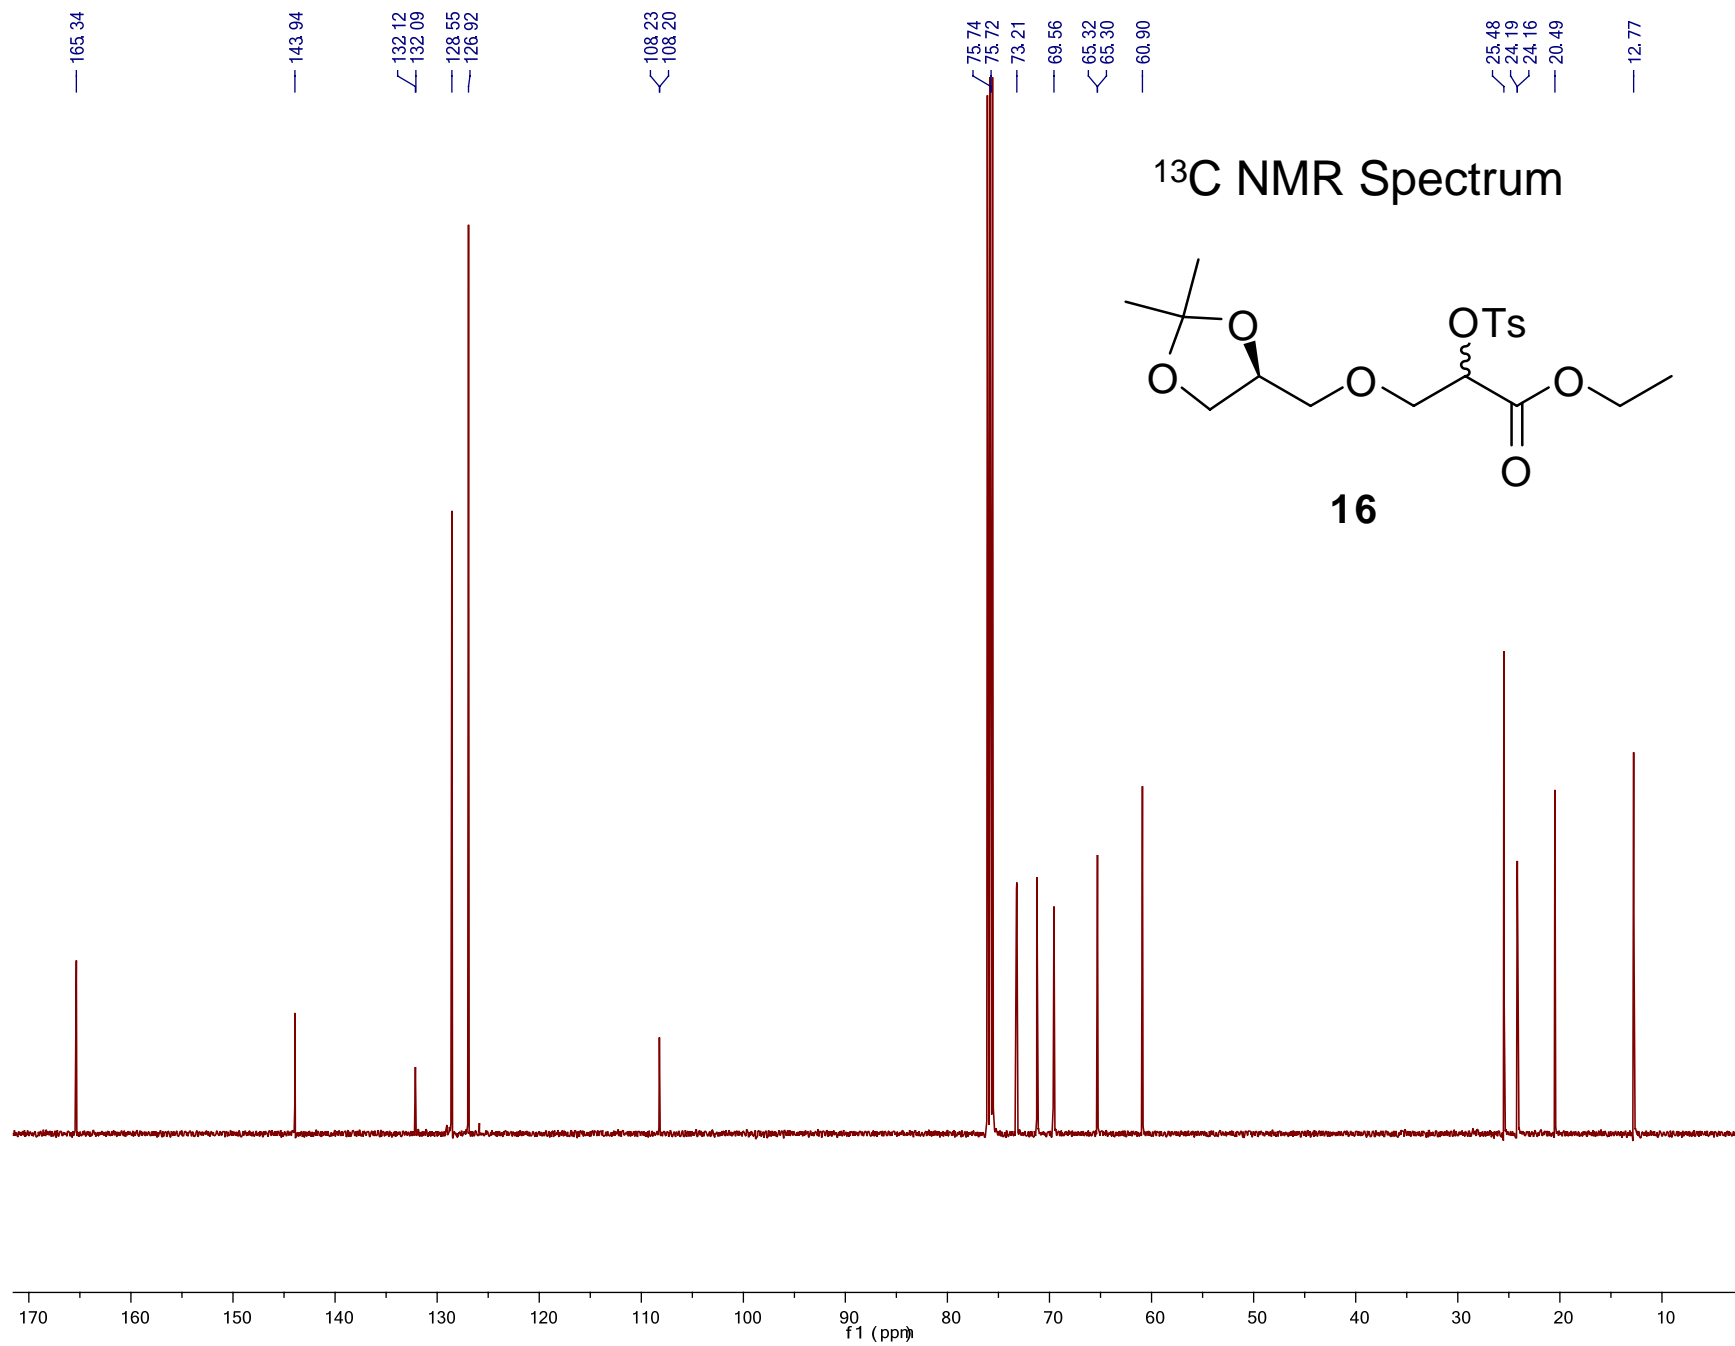

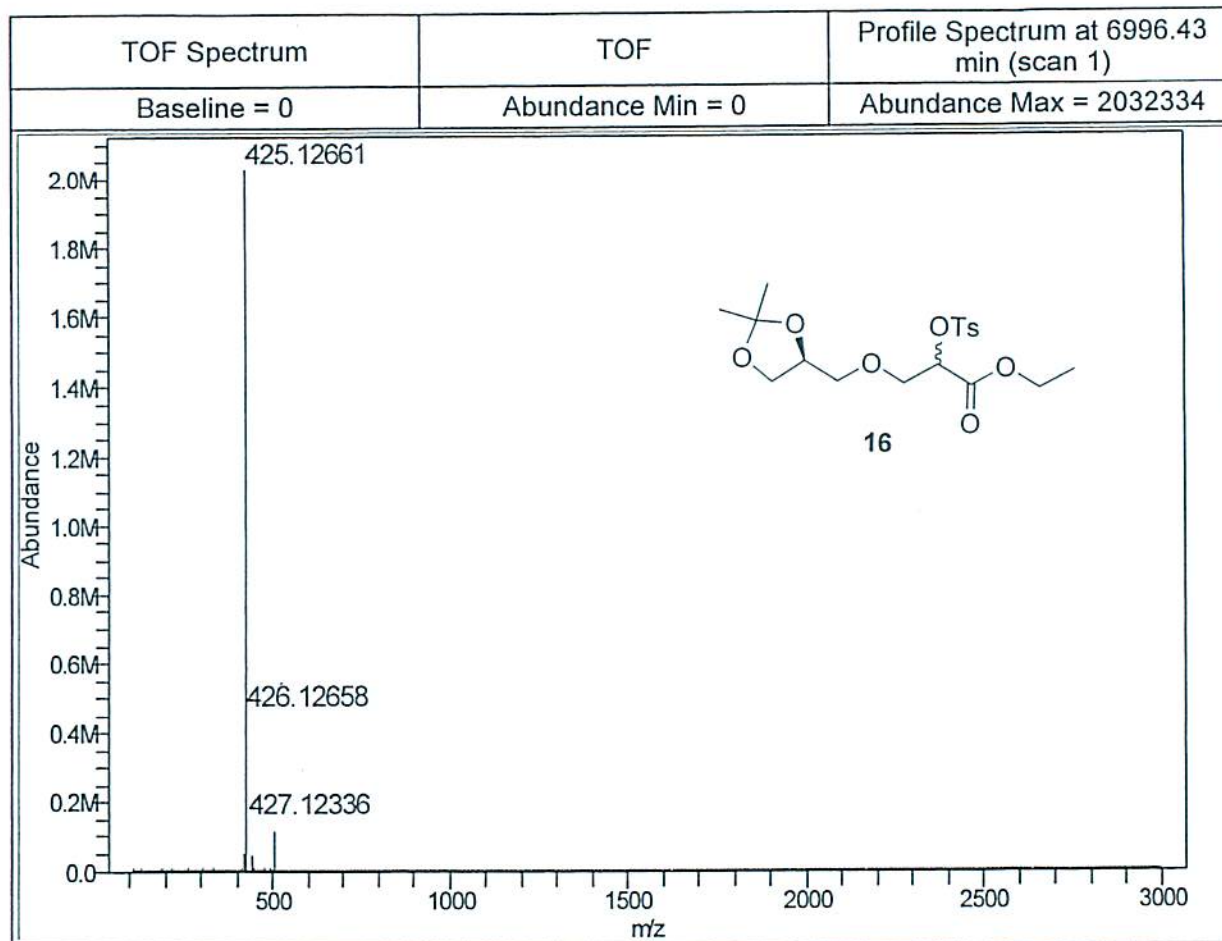

$^1\text{H}$  NMR Spectrum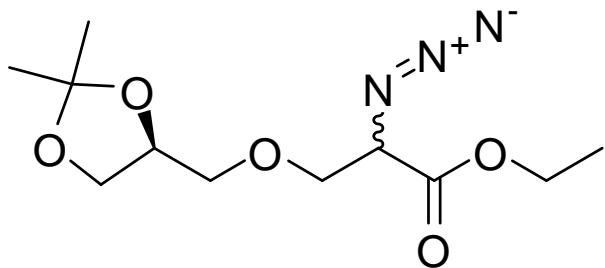

17

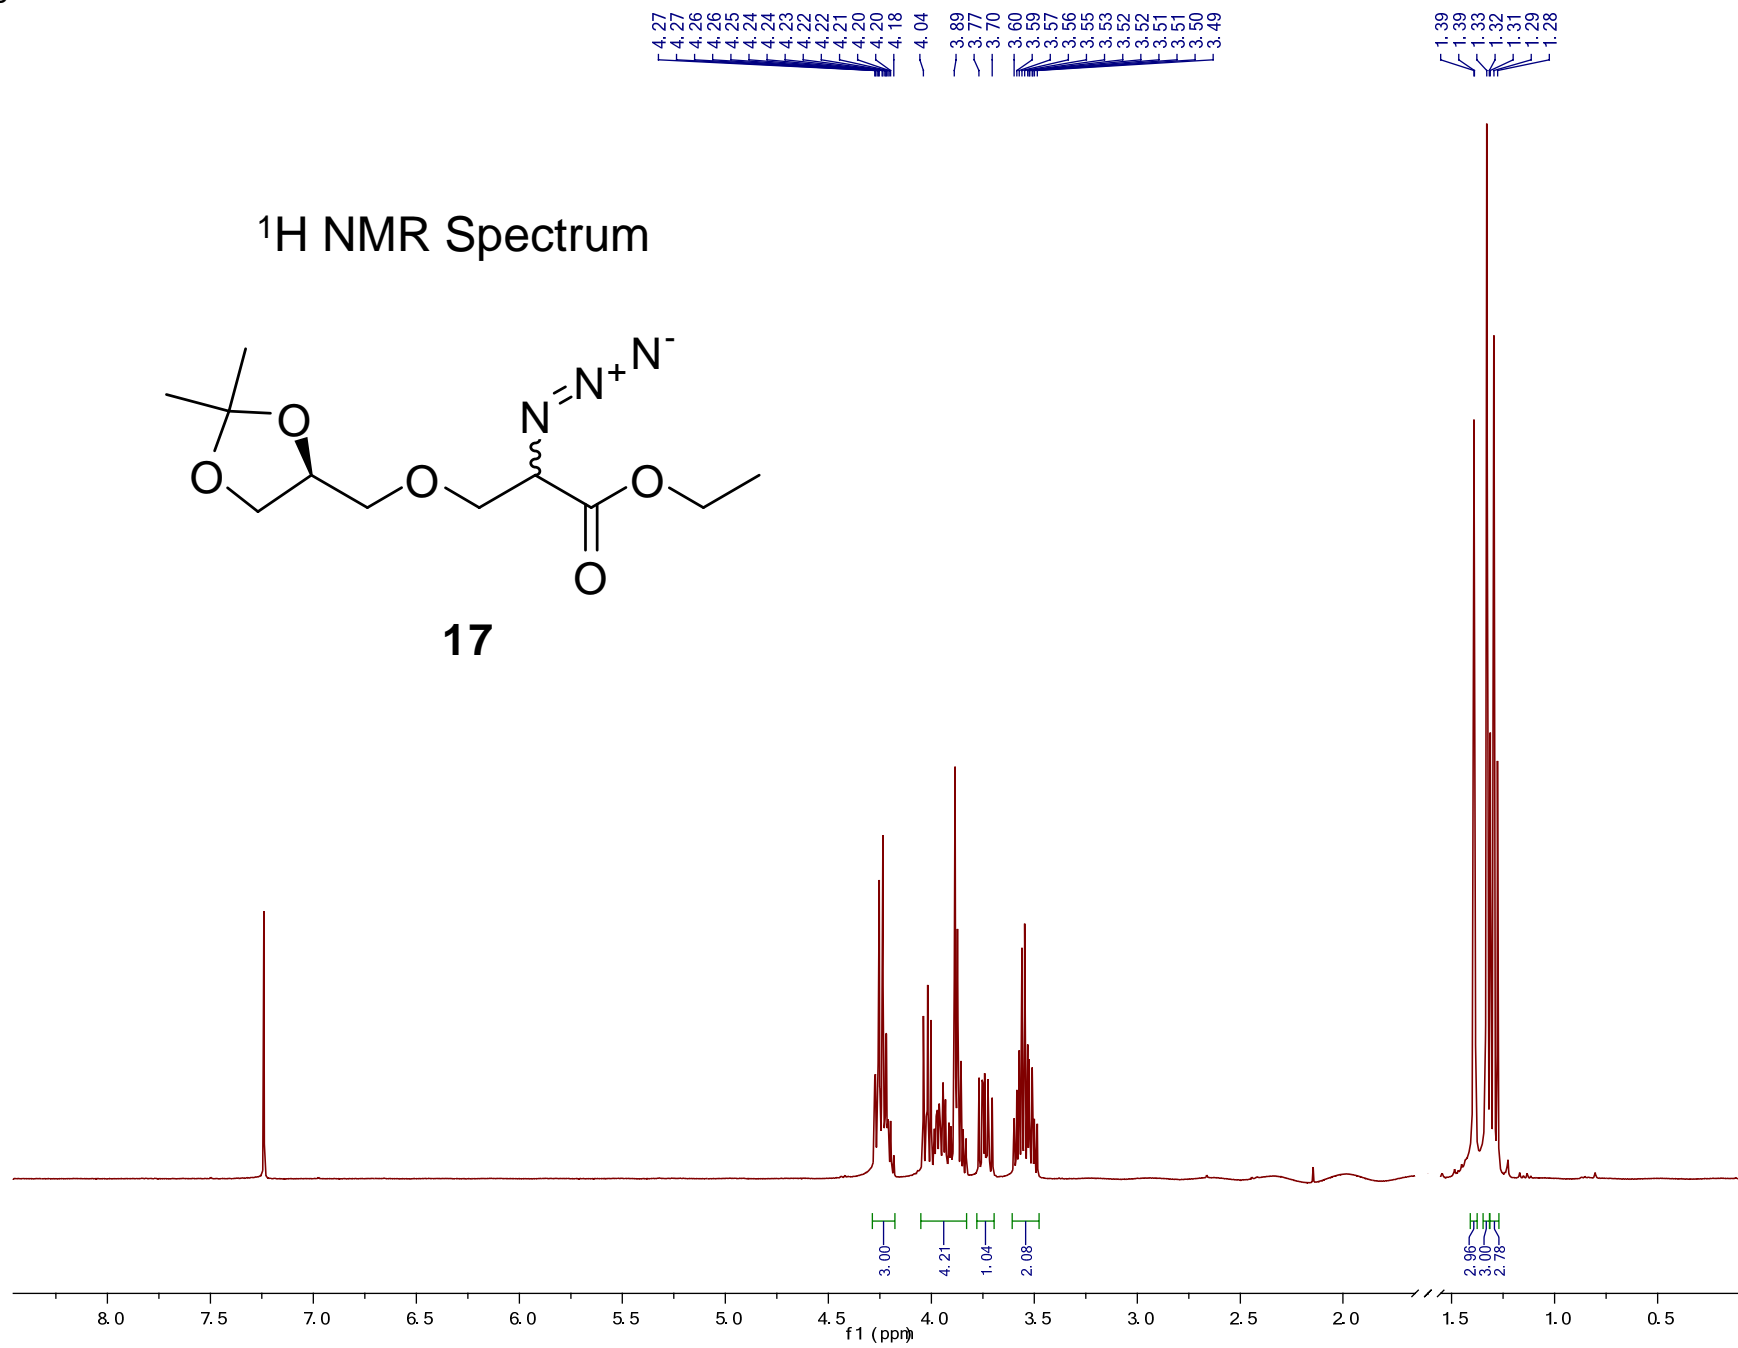

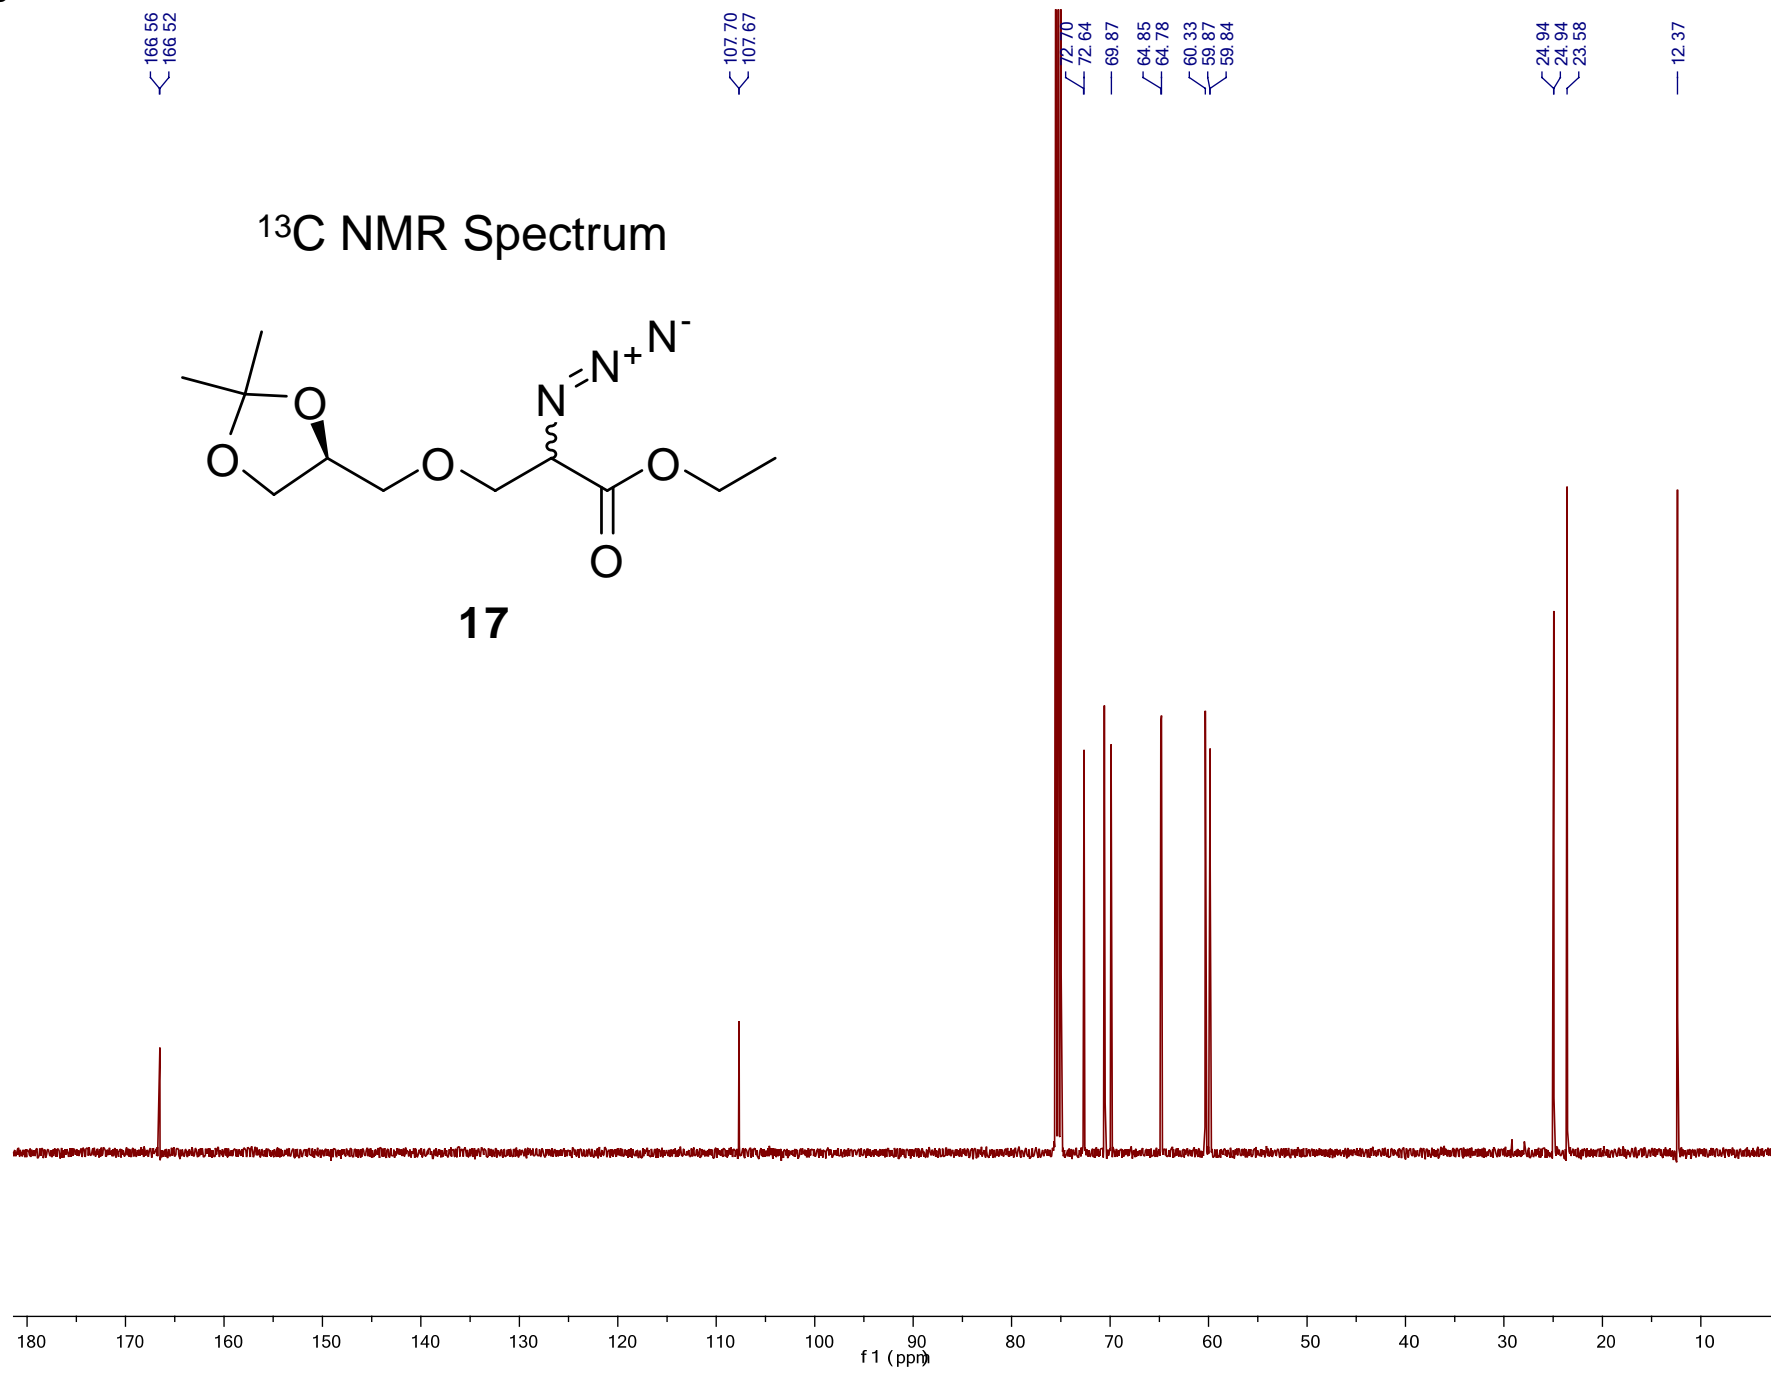



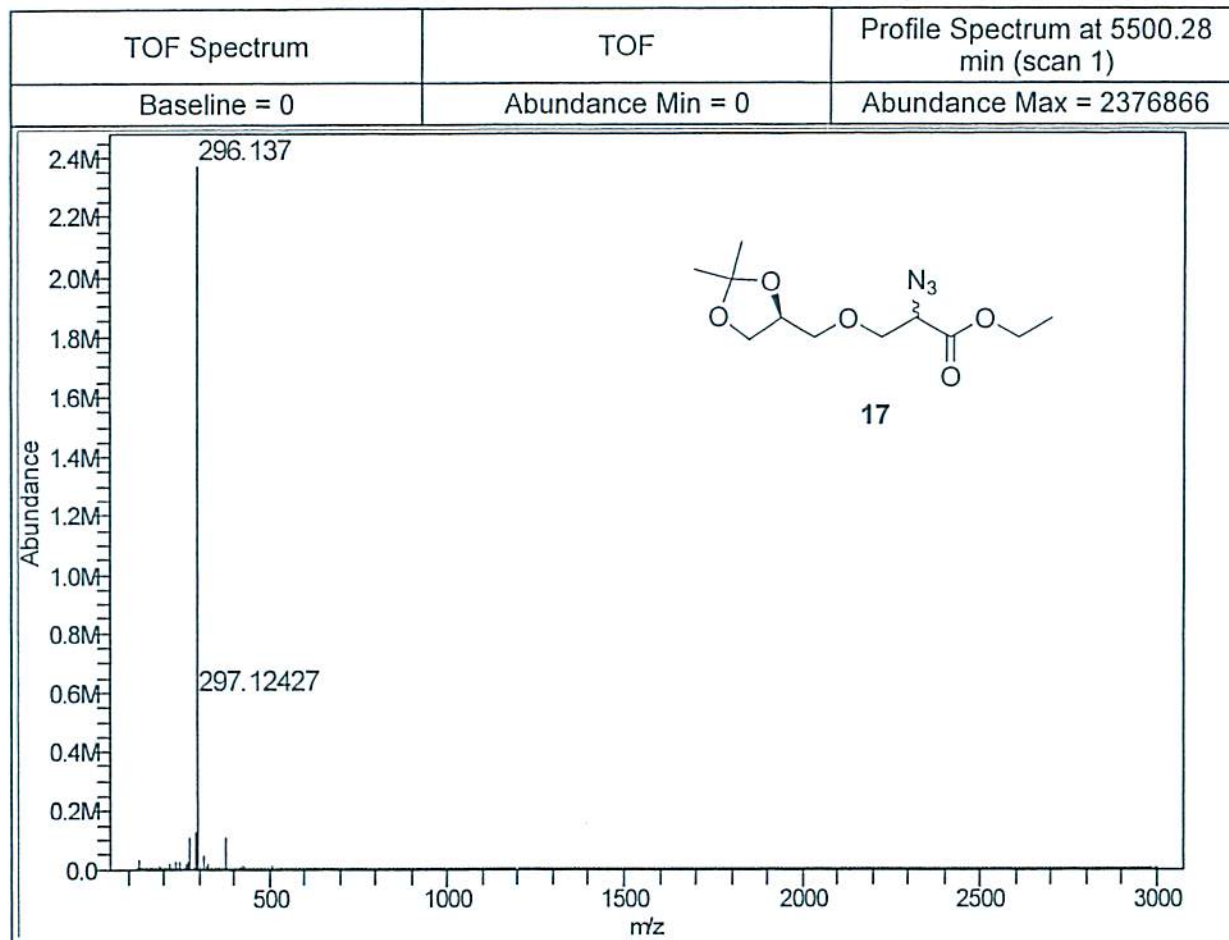

<sup>1</sup>H NMR Spectrum

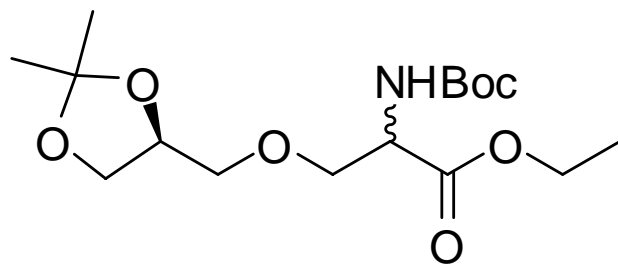

**18**

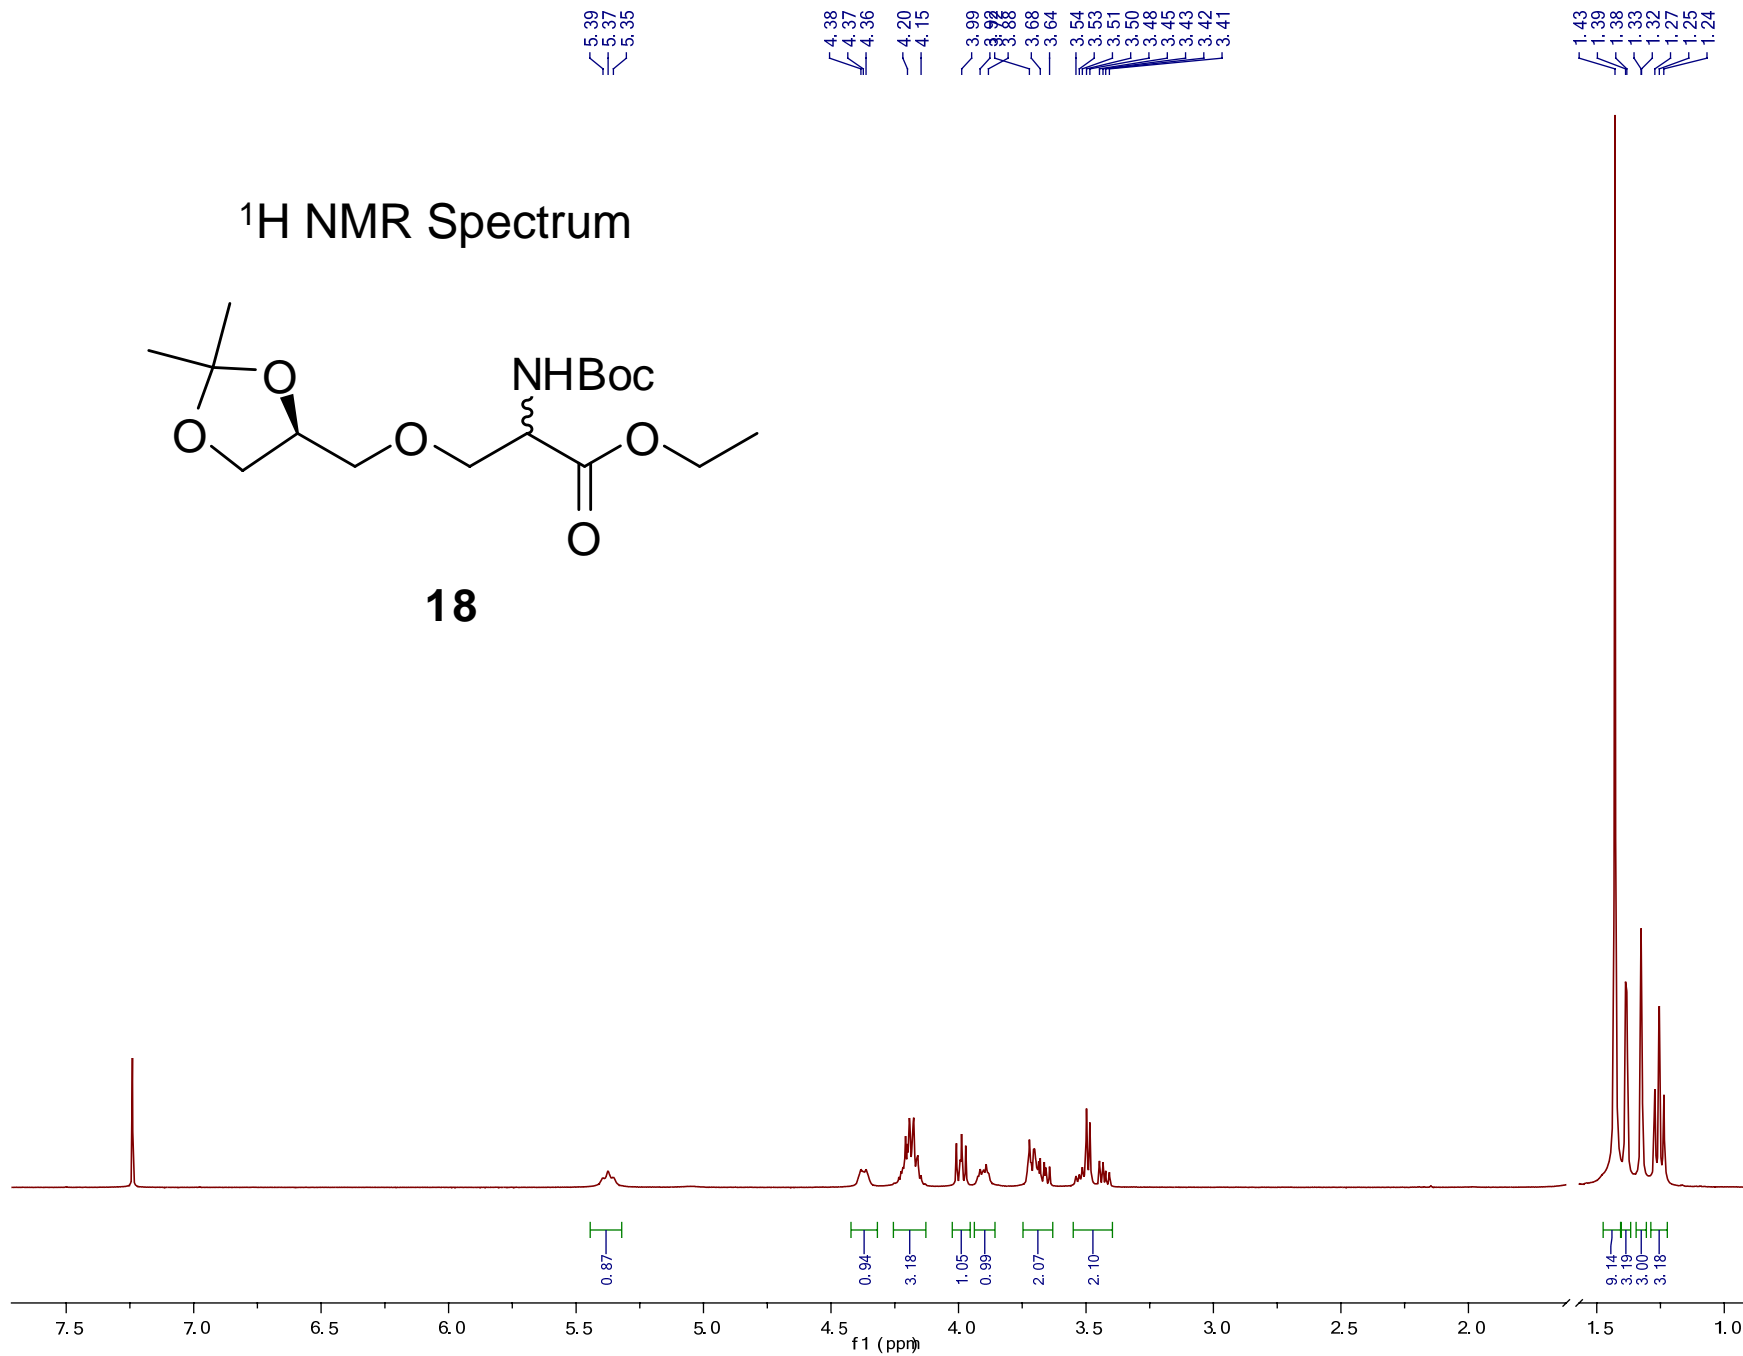

168.22  
168.20

153.15

107.09

77.59

70.07

69.40

69.32

64.23

64.14

59.17

51.70

25.95

24.36

24.28

23.05

22.99

11.81

 $^{13}\text{C}$  NMR Spectrum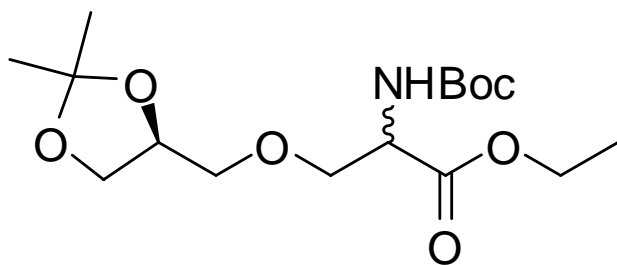**18**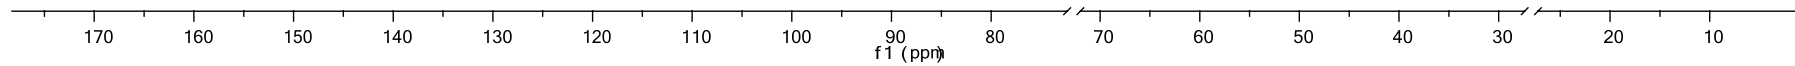

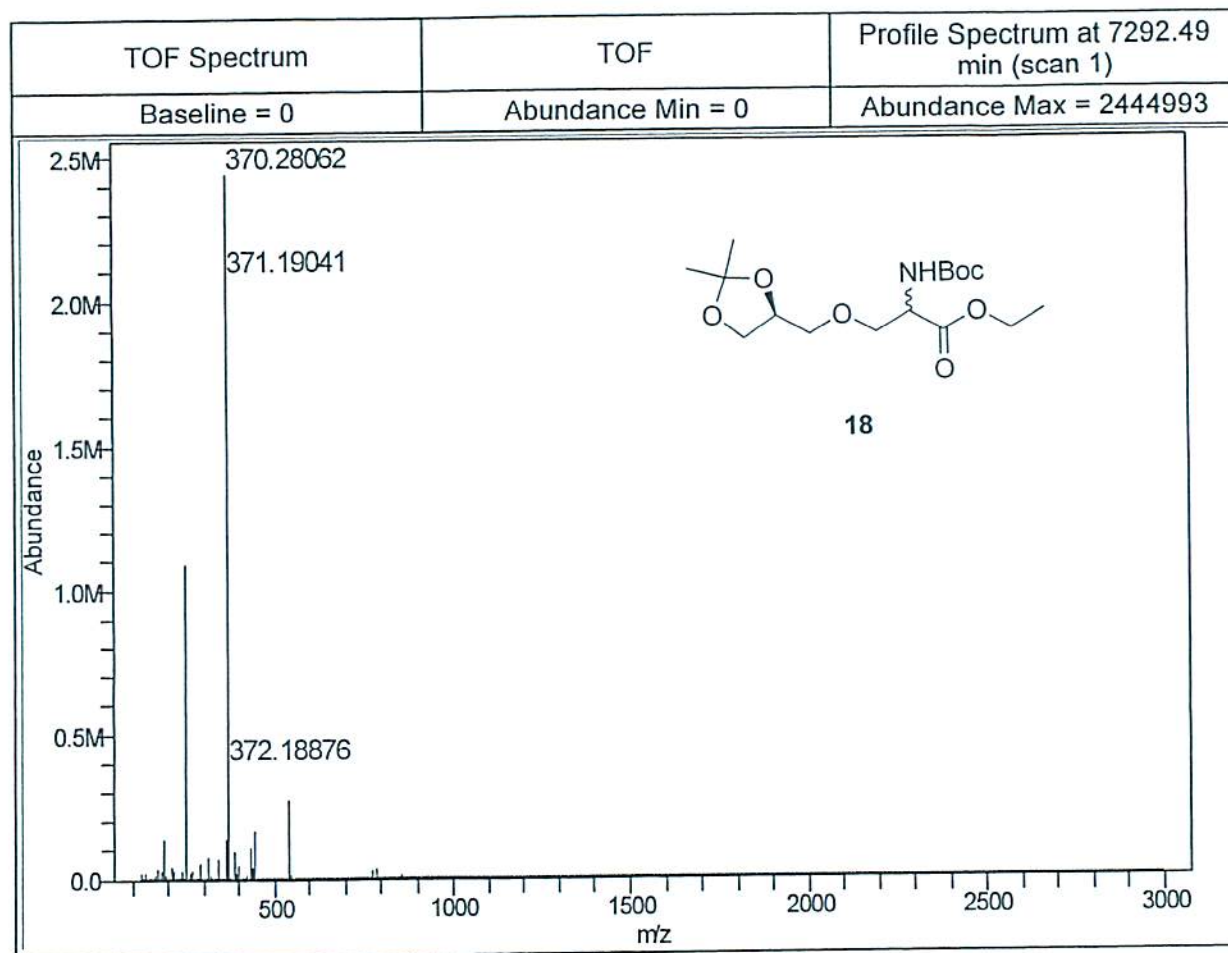

— 7.21

— 5.48

4.69  
4.68  
4.68  
4.67  
4.66  
4.65  
4.64  
4.63  
4.28  
4.26  
4.25  
4.24  
4.22  
4.02  
4.00  
3.71  
3.69  
3.68  
3.67  
3.67  
3.65  
3.63  
3.62  
3.60  
3.59  
3.58  
3.56  
3.55  
3.54  
3.53  
3.52  
3.501.44  
1.40  
1.39  
1.33  
1.33  
1.12  
1.11

# <sup>1</sup>H NMR Spectrum

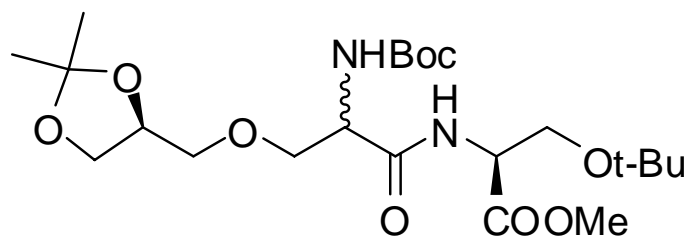**19a**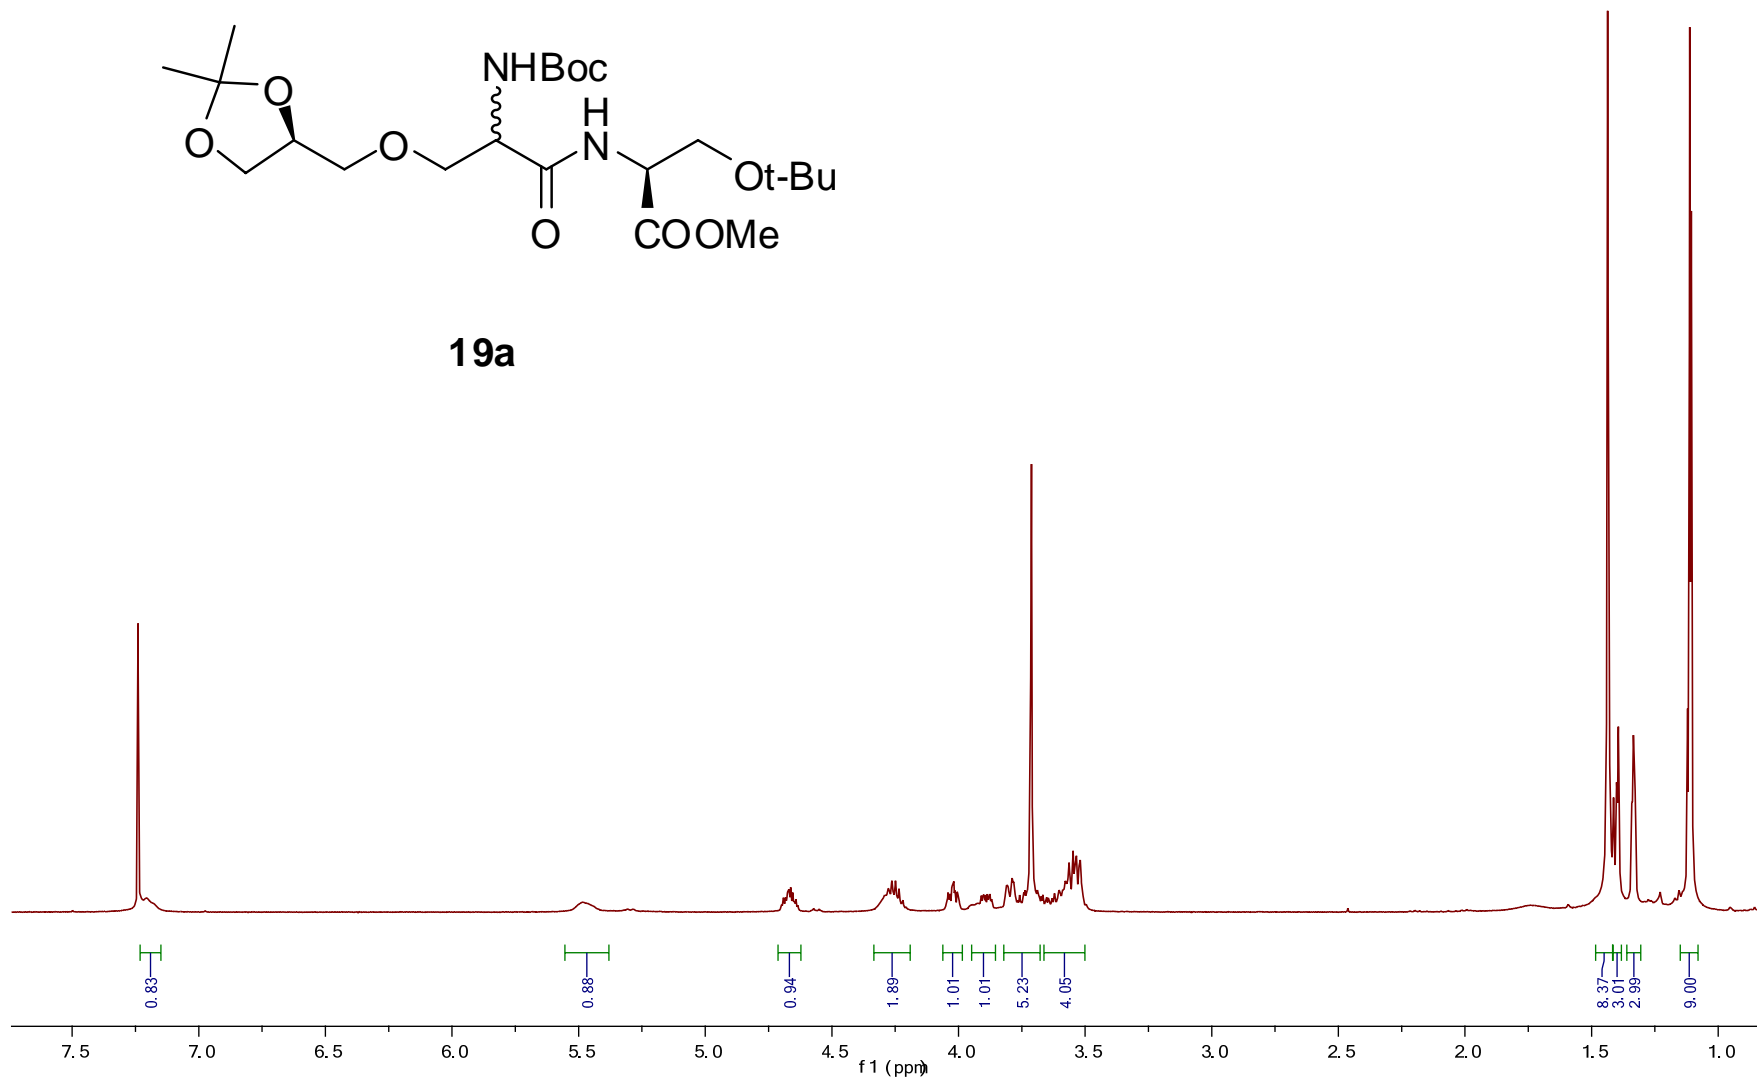

168.88  
168.87  
168.81

108.20  
108.15

73.16  
73.12  
72.15  
71.24  
71.00  
69.92  
68.82  
65.06  
60.57  
60.54

51.78  
51.03

26.98  
25.97  
25.44  
25.42  
24.10

### <sup>13</sup>C NMR Spectrum

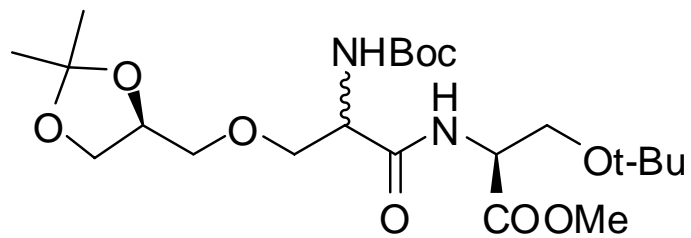

**19a**

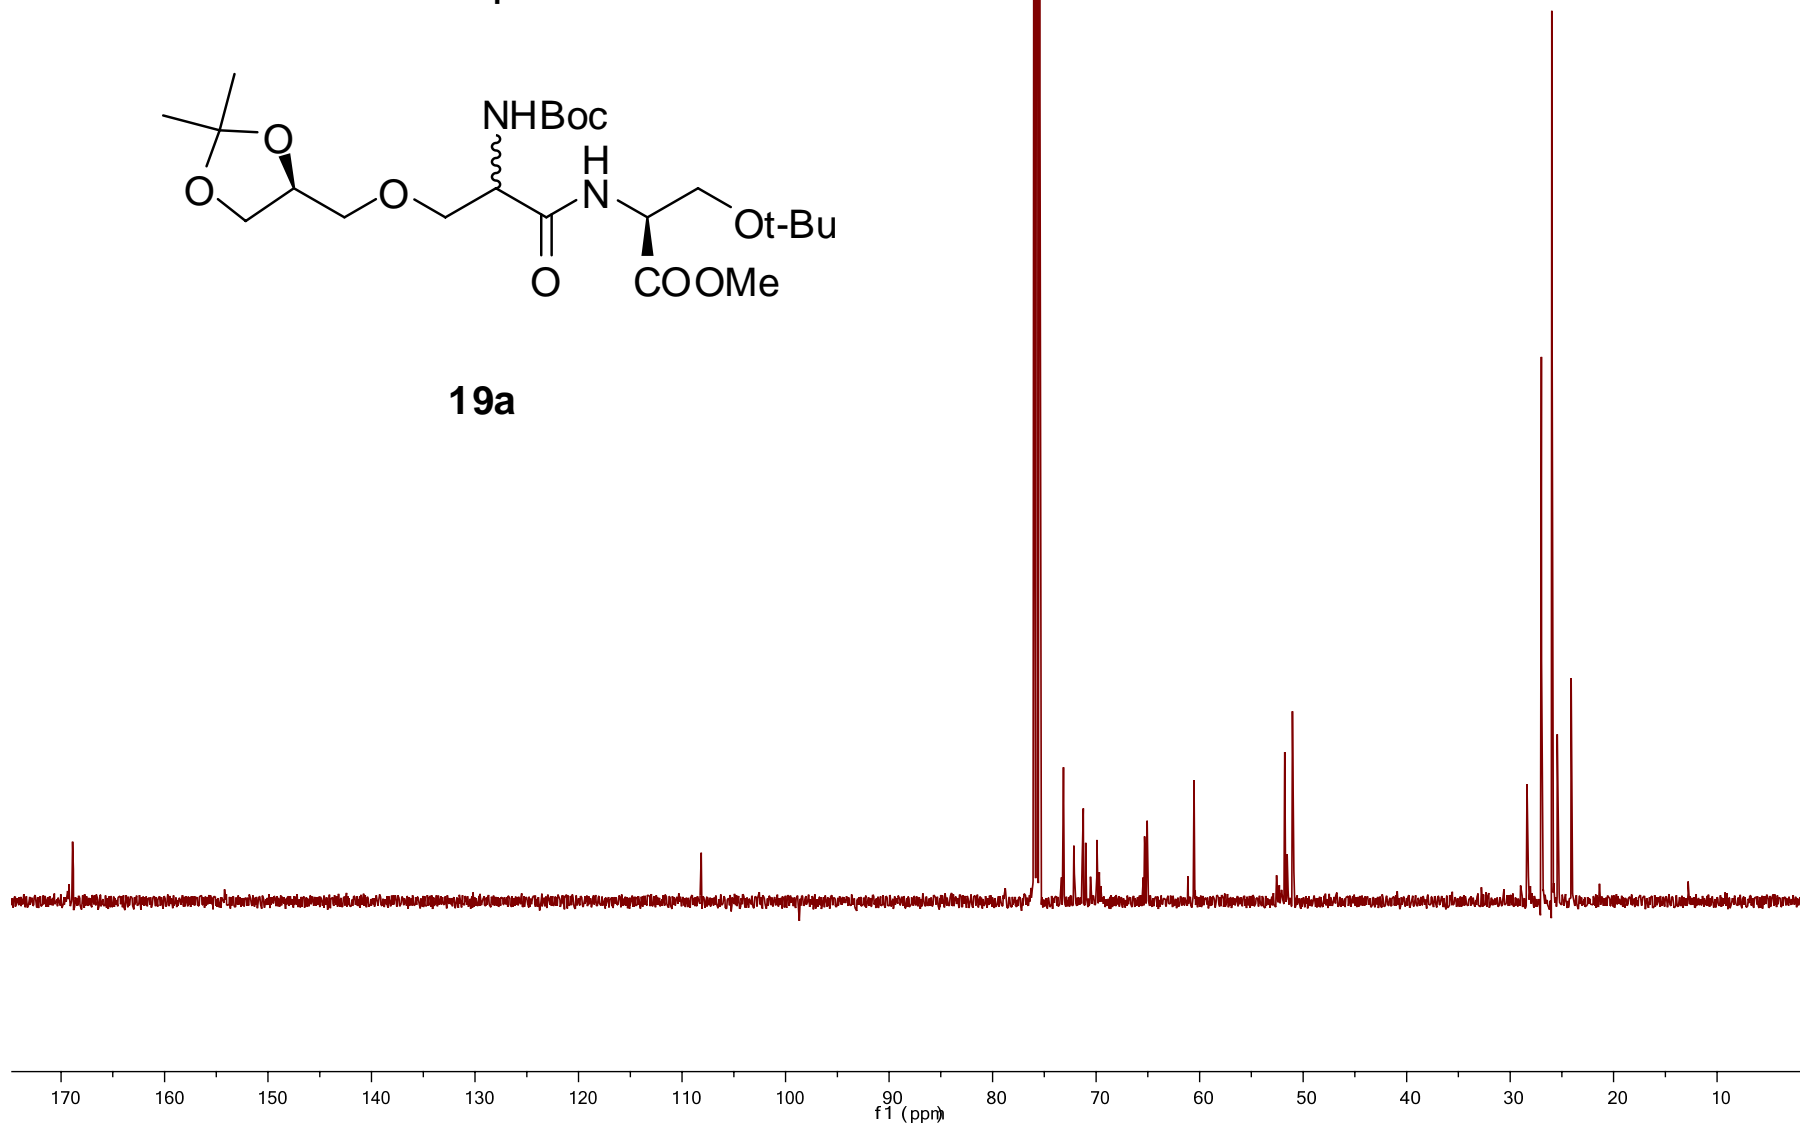

7.21  
5.49  
4.69, 4.68, 4.67, 4.66, 4.65, 4.64, 4.63, 4.24, 4.22, 4.21  
4.00  
3.89, 3.88, 3.81, 3.79, 3.77, 3.74, 3.71, 3.68, 3.67, 3.65, 3.62, 3.59, 3.55, 3.52  
1.44, 1.41, 1.40, 1.39, 1.34, 1.33, 1.33, 1.12, 1.11, 1.11

# <sup>1</sup>H NMR Spectrum

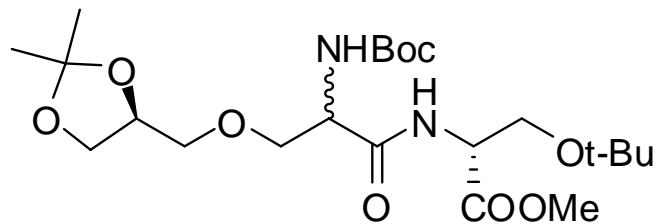

**19b**

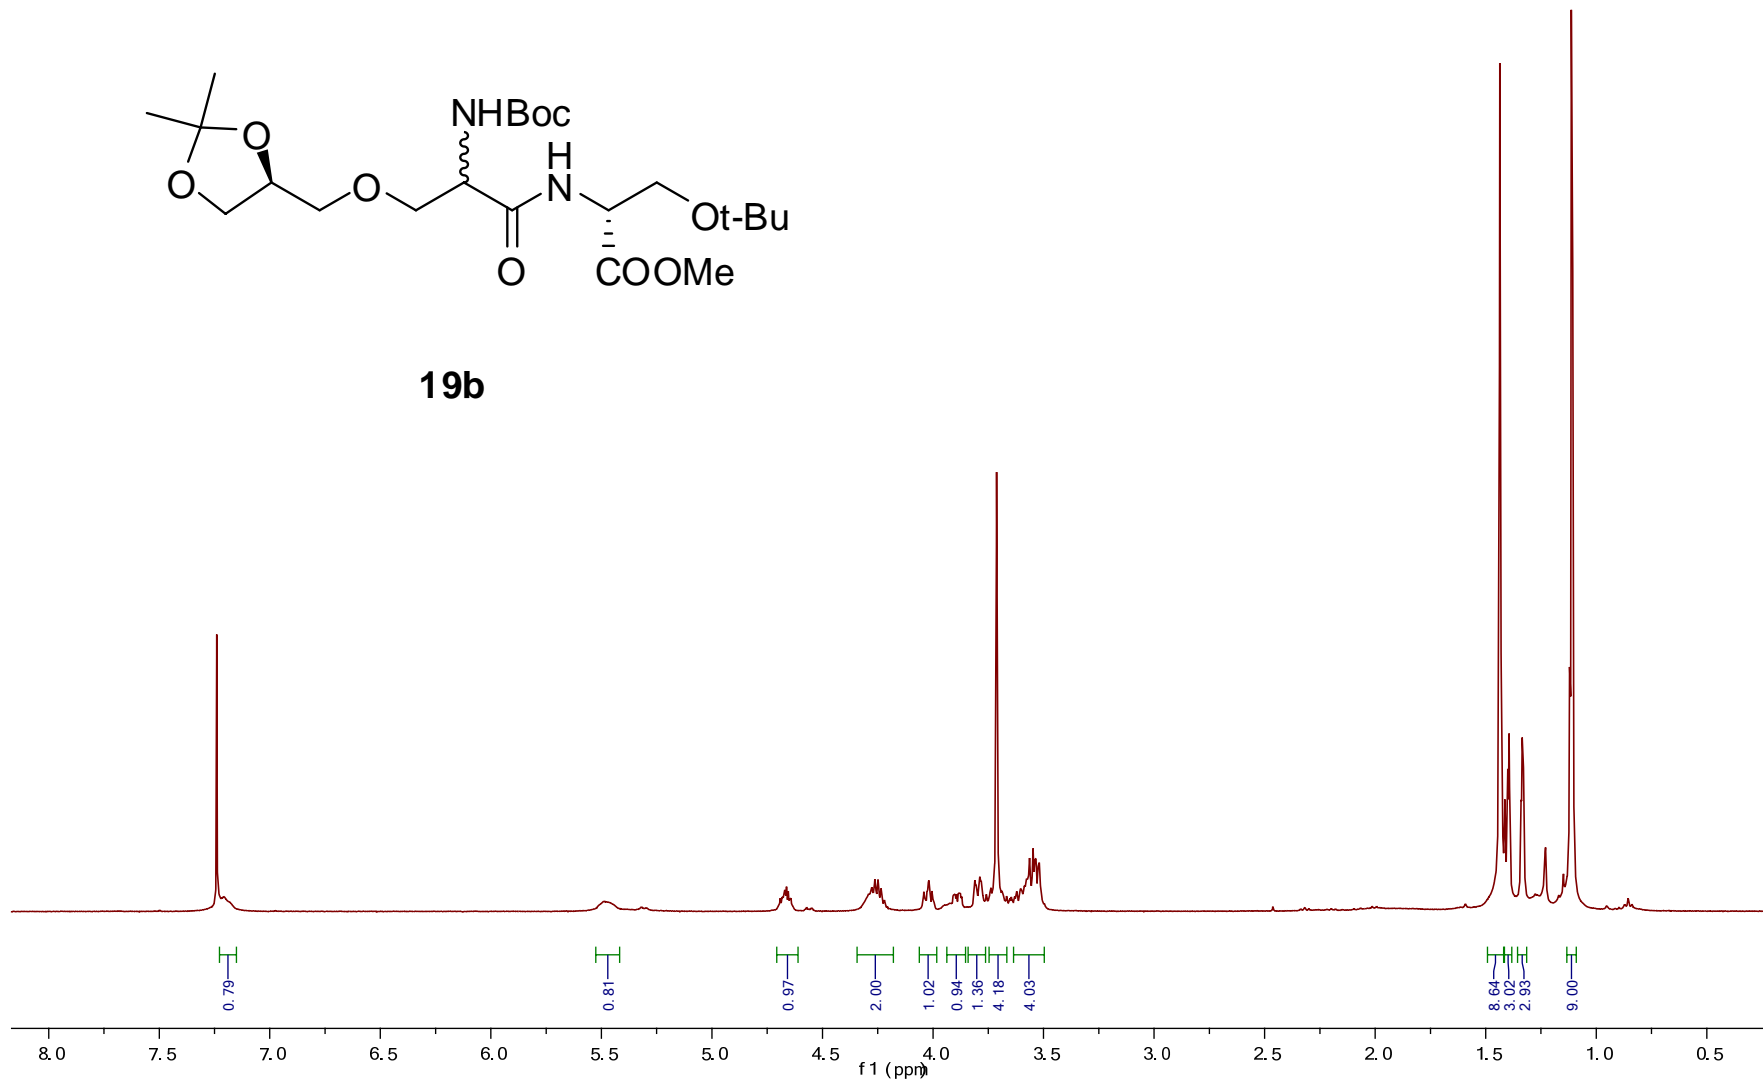

167.90  
167.83

107.19  
107.18

72.18  
72.14  
71.19  
70.27  
70.03  
68.84  
64.09  
59.59  
59.56  
50.80  
50.05

27.40  
26.00  
24.99  
24.47  
24.44  
23.12

### <sup>13</sup>C NMR Spectrum

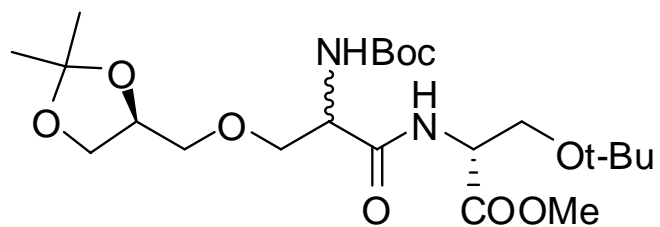

**19b**

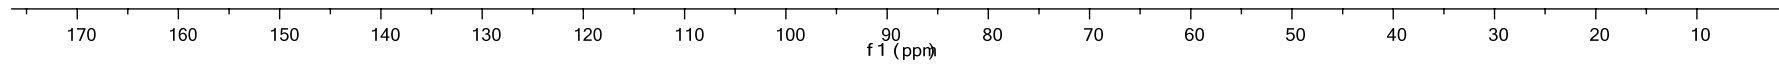



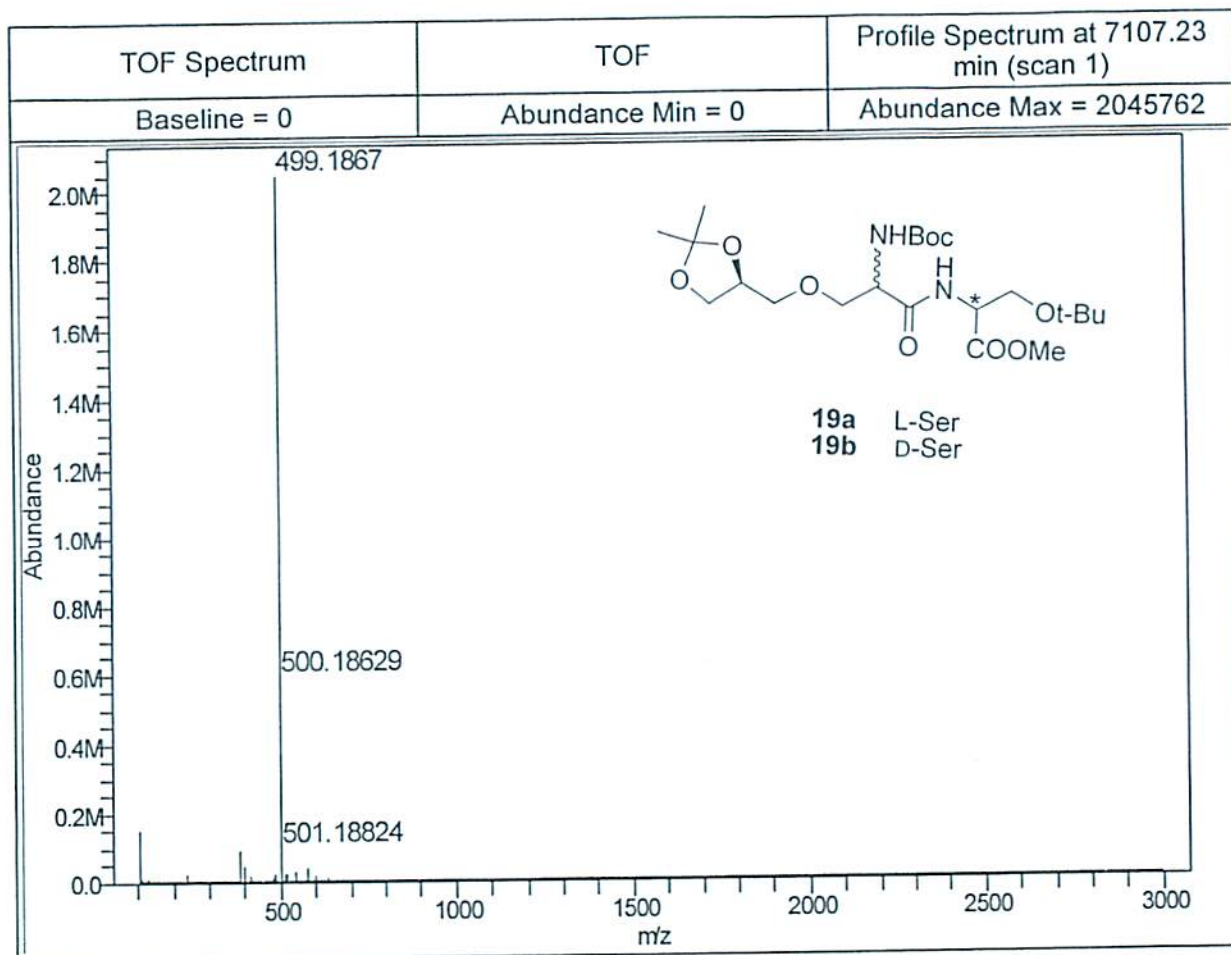

$^1\text{H}$  NMR Spectrum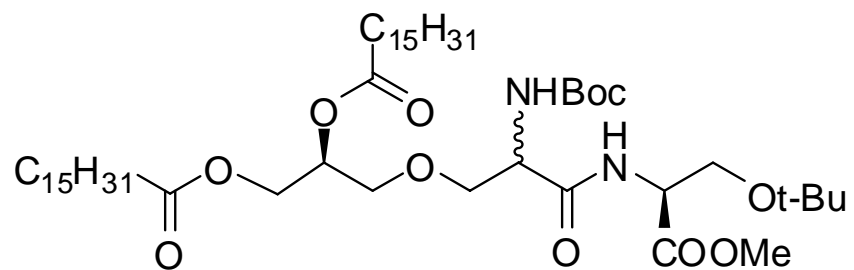

20a

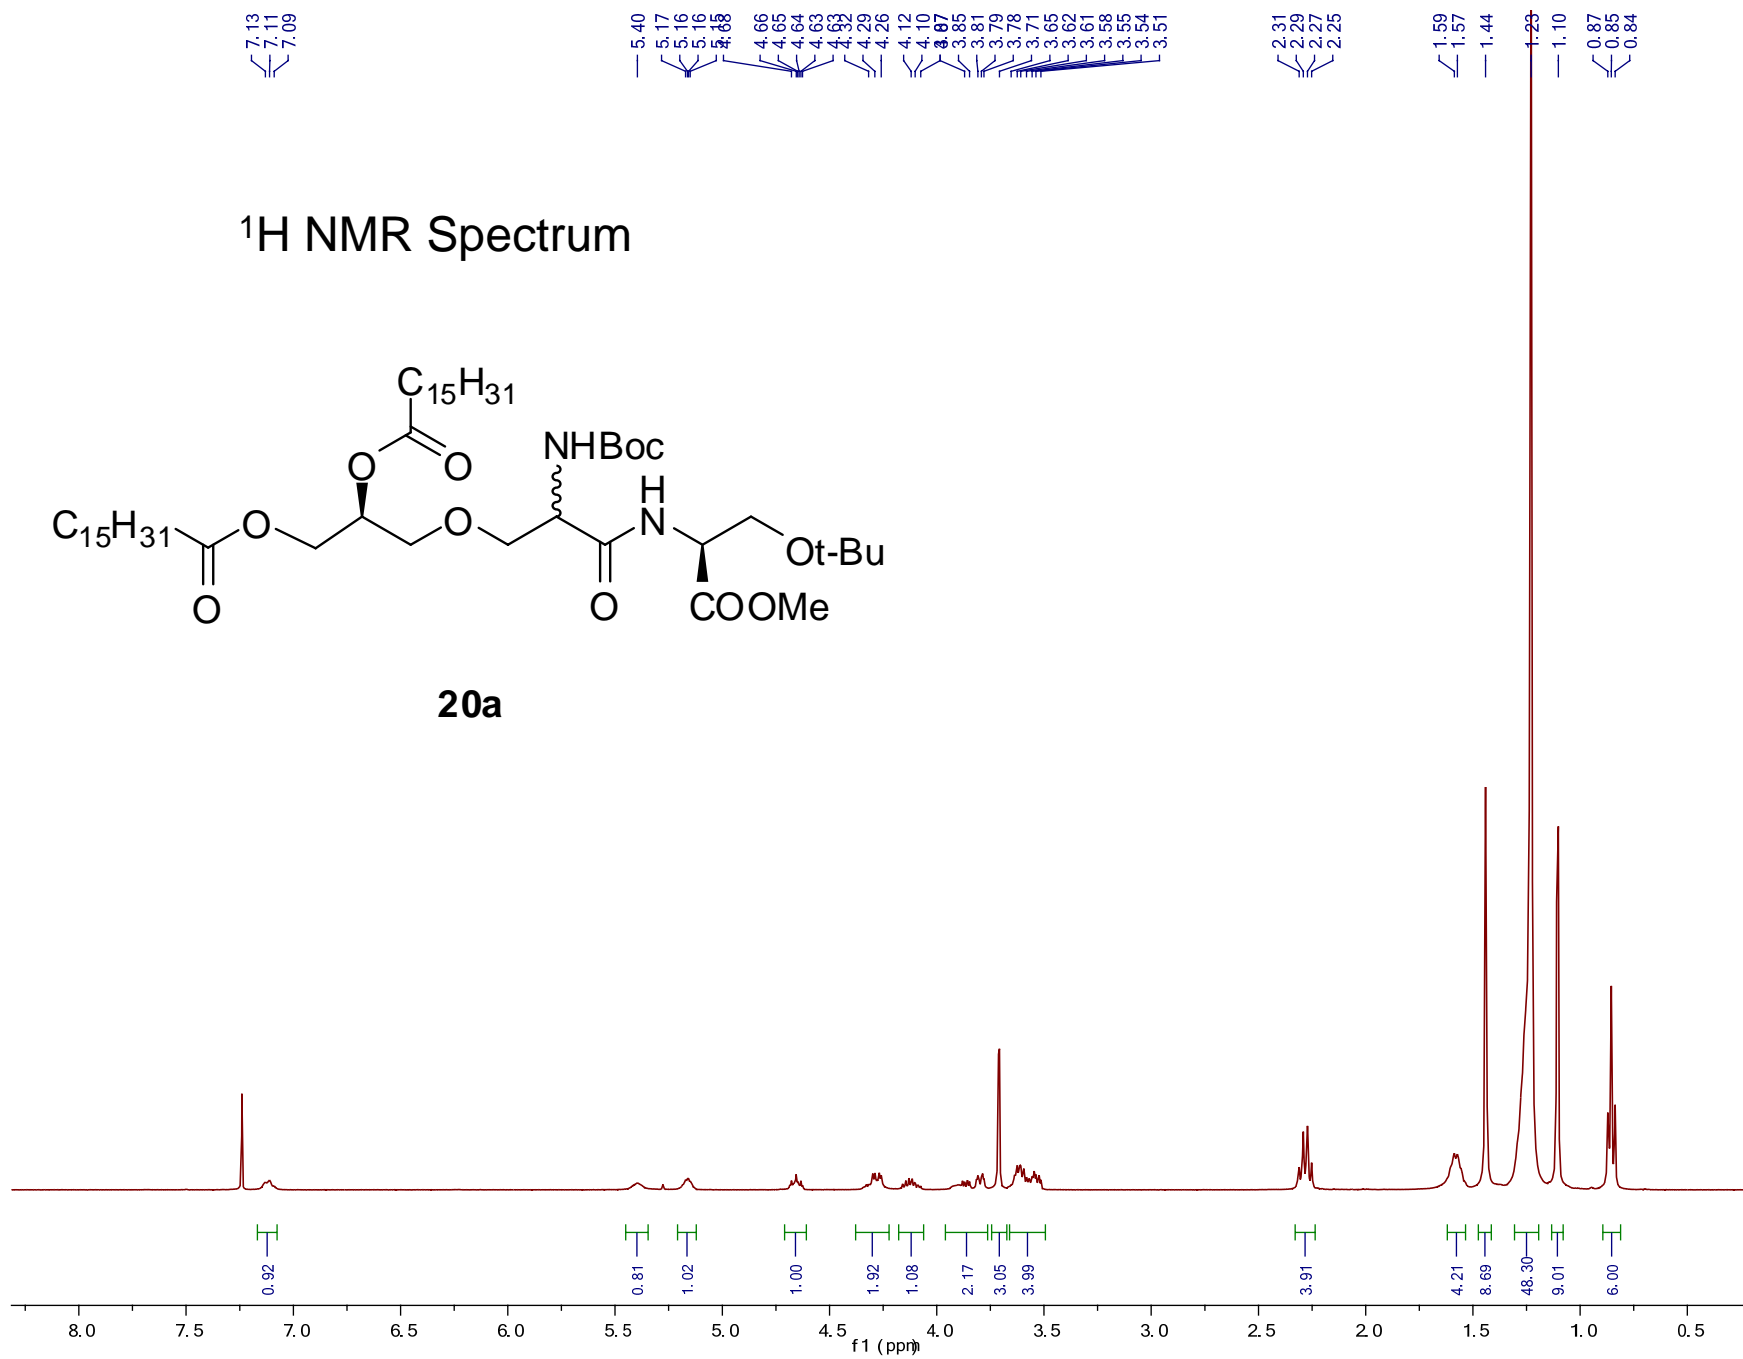

172.18  
172.17  
171.93  
171.88  
171.86  
169.40  
168.79

154.29  
154.21

79.12  
79.10  
78.98  
78.97  
72.28  
72.26  
68.70  
68.55  
68.41  
61.19  
60.64

51.90  
51.66  
51.18  
51.16

33.07  
33.05  
32.91  
28.54  
26.09  
23.70  
21.51

12.94

### $^{13}\text{C}$ NMR Spectrum

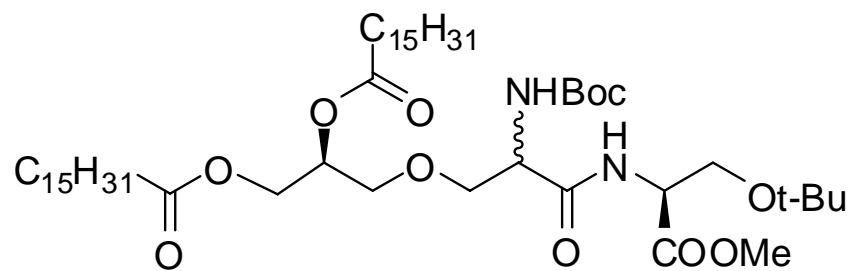

**20a**

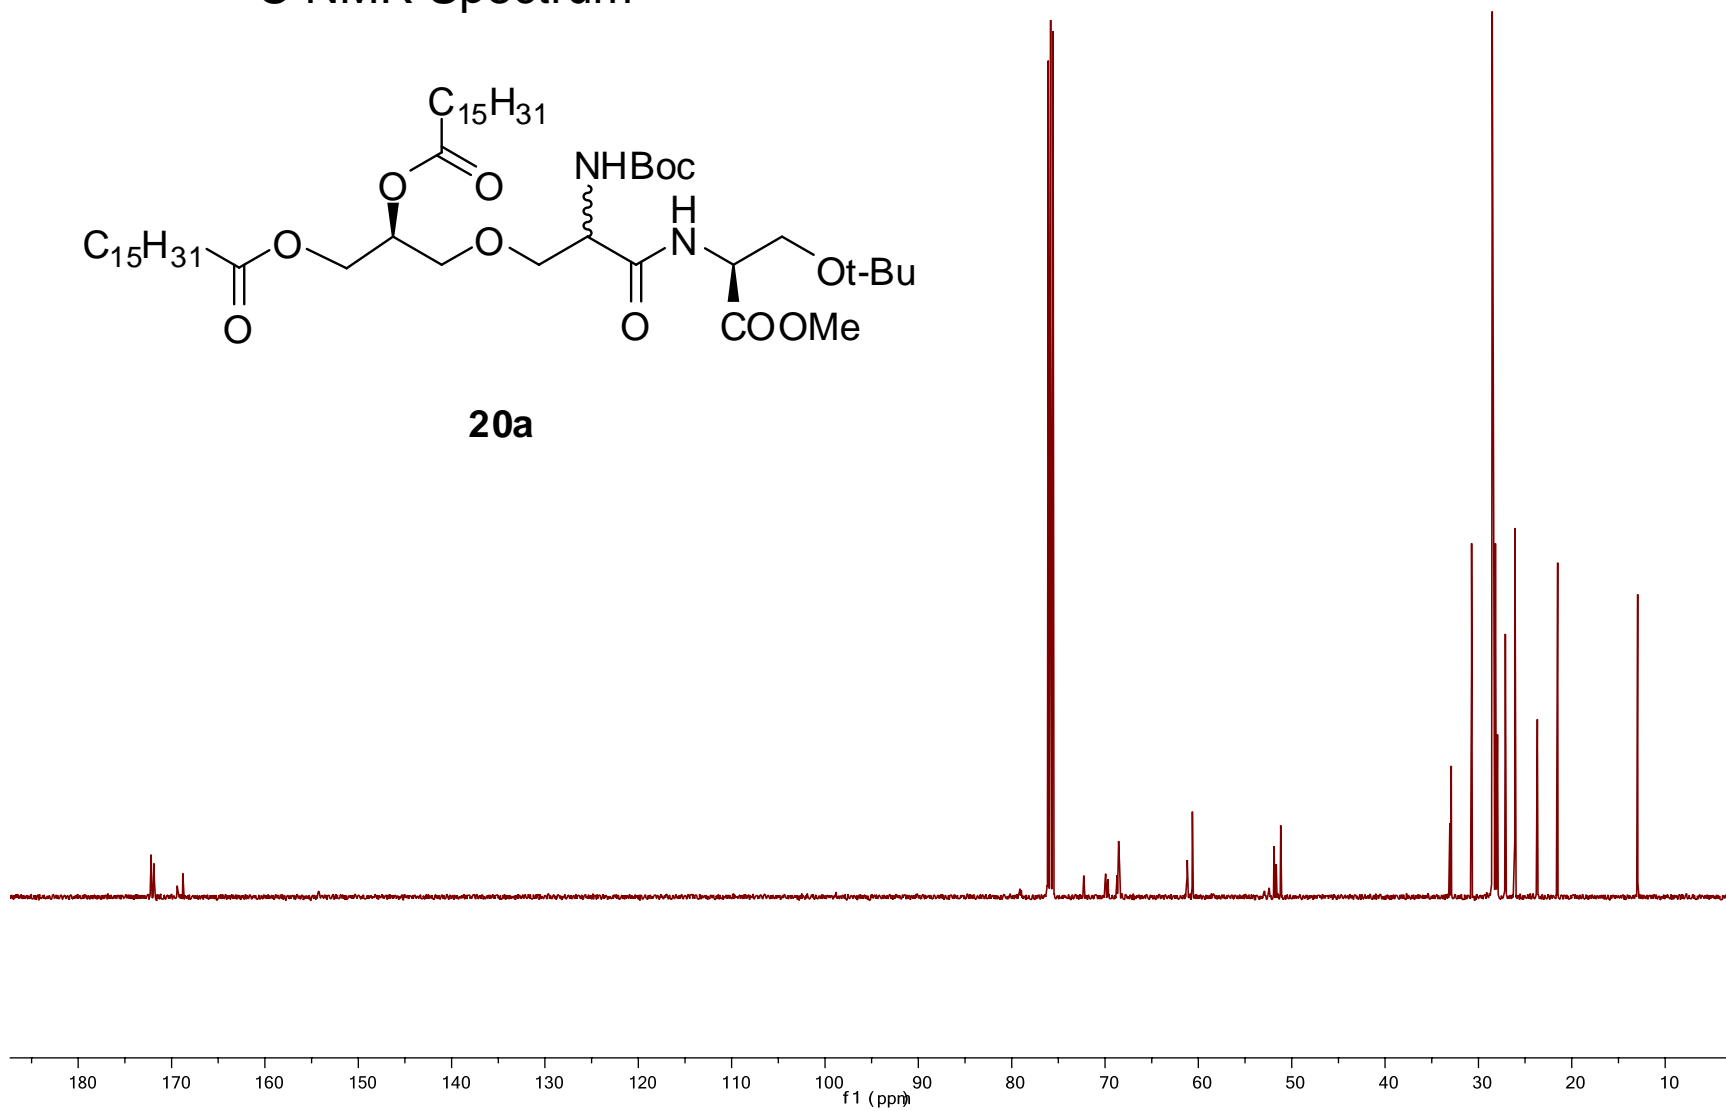

7.14  
7.11  
7.095.40  
5.19  
5.17  
5.16  
5.15  
4.66  
4.66  
4.65  
4.64  
4.63  
4.63  
4.31  
4.29  
4.26  
4.12  
4.10  
3.97  
3.65  
3.64  
3.62  
3.61  
3.59  
3.58  
3.57  
3.55  
3.54  
3.53  
3.52  
3.512.31  
2.29  
2.27  
2.251.60  
1.59  
1.57  
1.55  
1.44  
1.29  
1.11  
1.10  
0.87  
0.85  
0.84 $^1\text{H}$  NMR Spectrum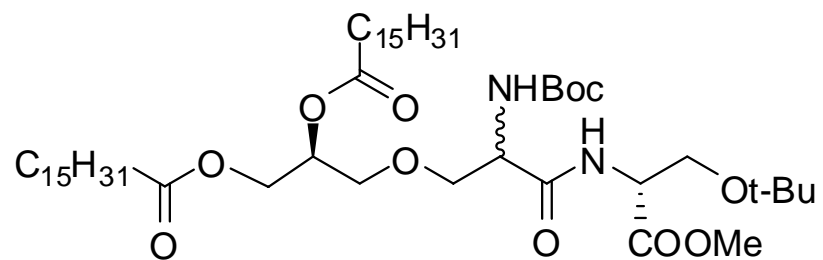**20b**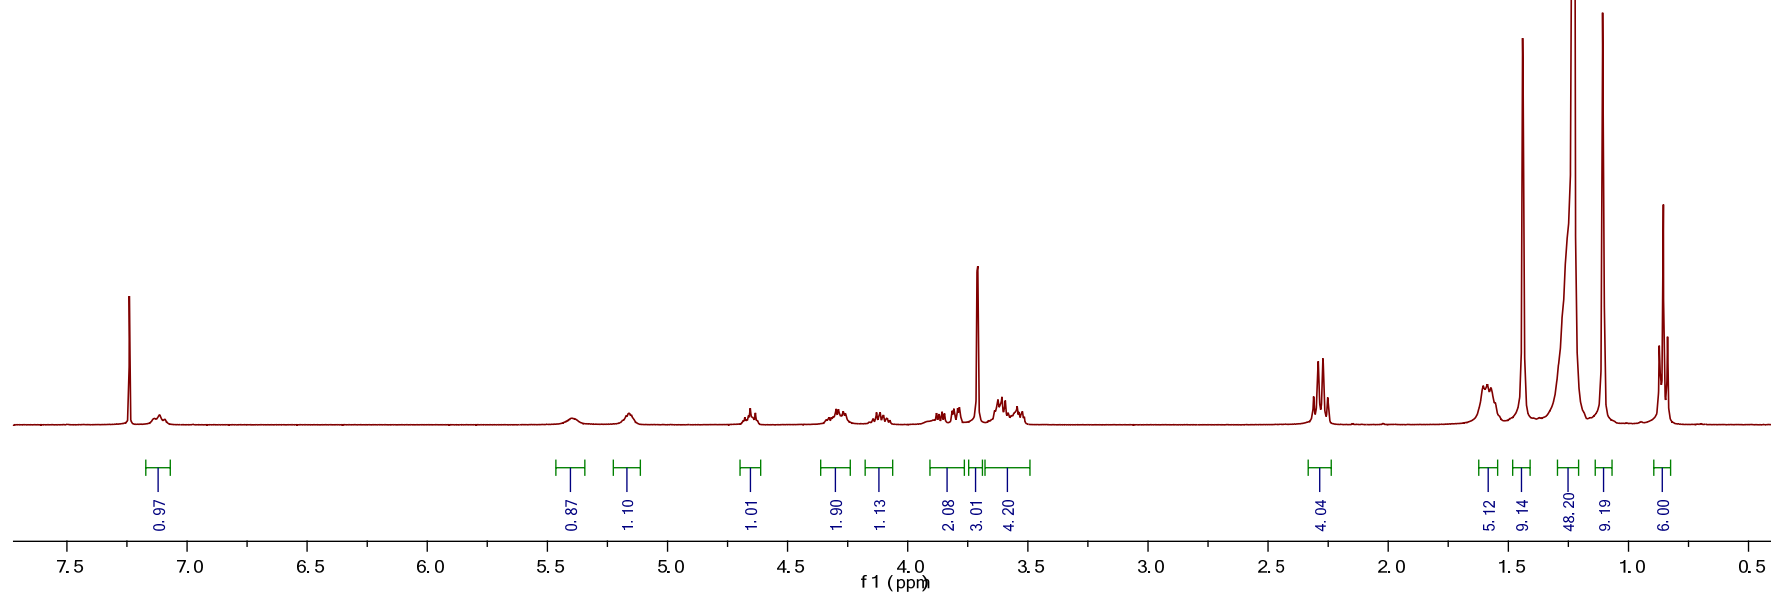

171.85  
171.83  
171.60  
171.55  
171.53  
168.96  
168.46

153.99  
153.85

### $^{13}\text{C}$ NMR Spectrum

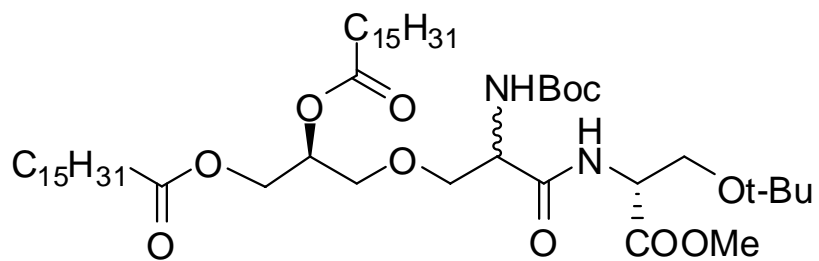

**20b**

78.79  
78.65  
78.64  
71.96  
71.95  
69.40  
68.25  
68.08  
60.86  
60.31  
51.57  
51.32  
50.85  
50.83  
32.75  
32.74  
32.58  
30.41  
27.85  
25.76  
23.37  
21.18  
12.61

190 180 170 160 150 140 130 120 110 100 90 80 70 60 50 40 30 20 10  
f1 (ppm)

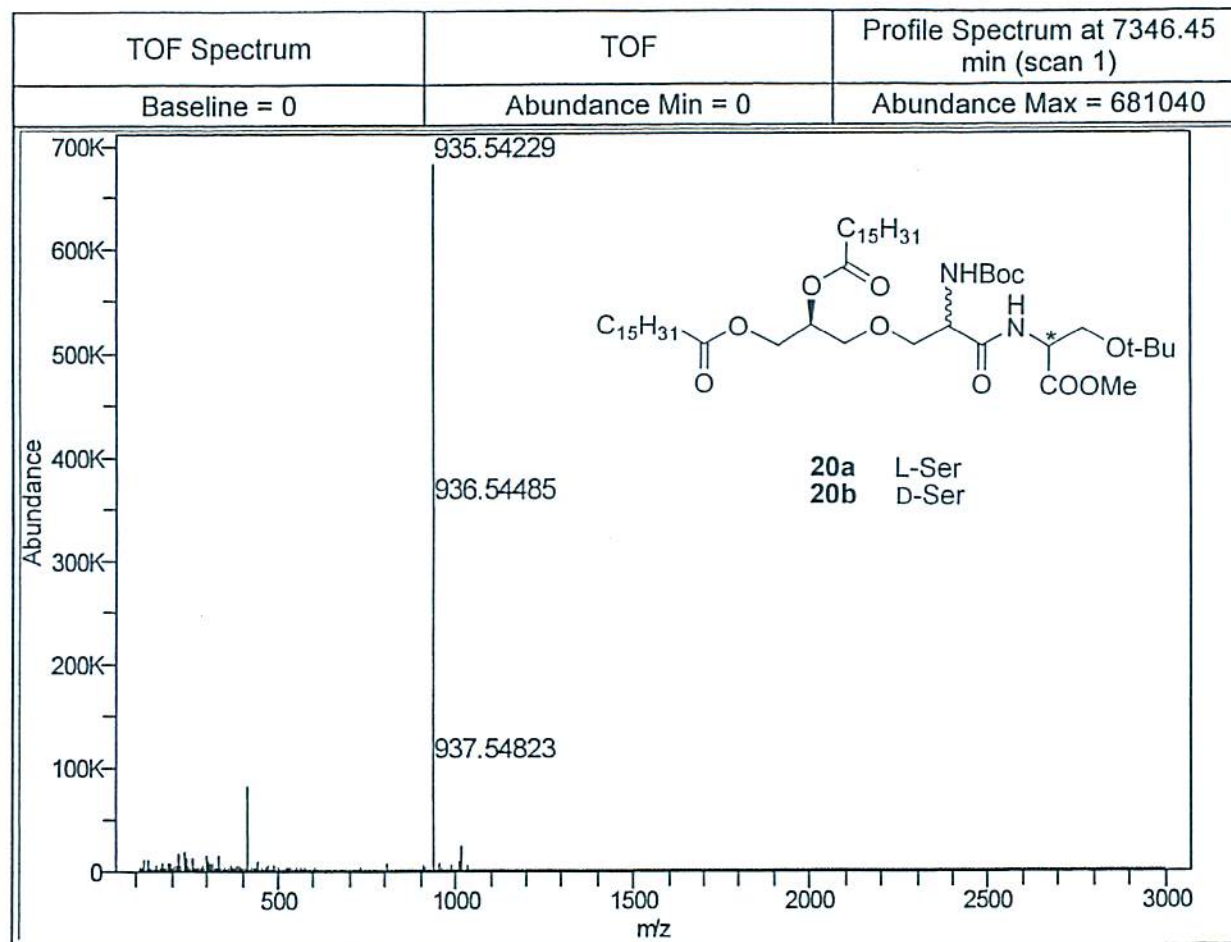

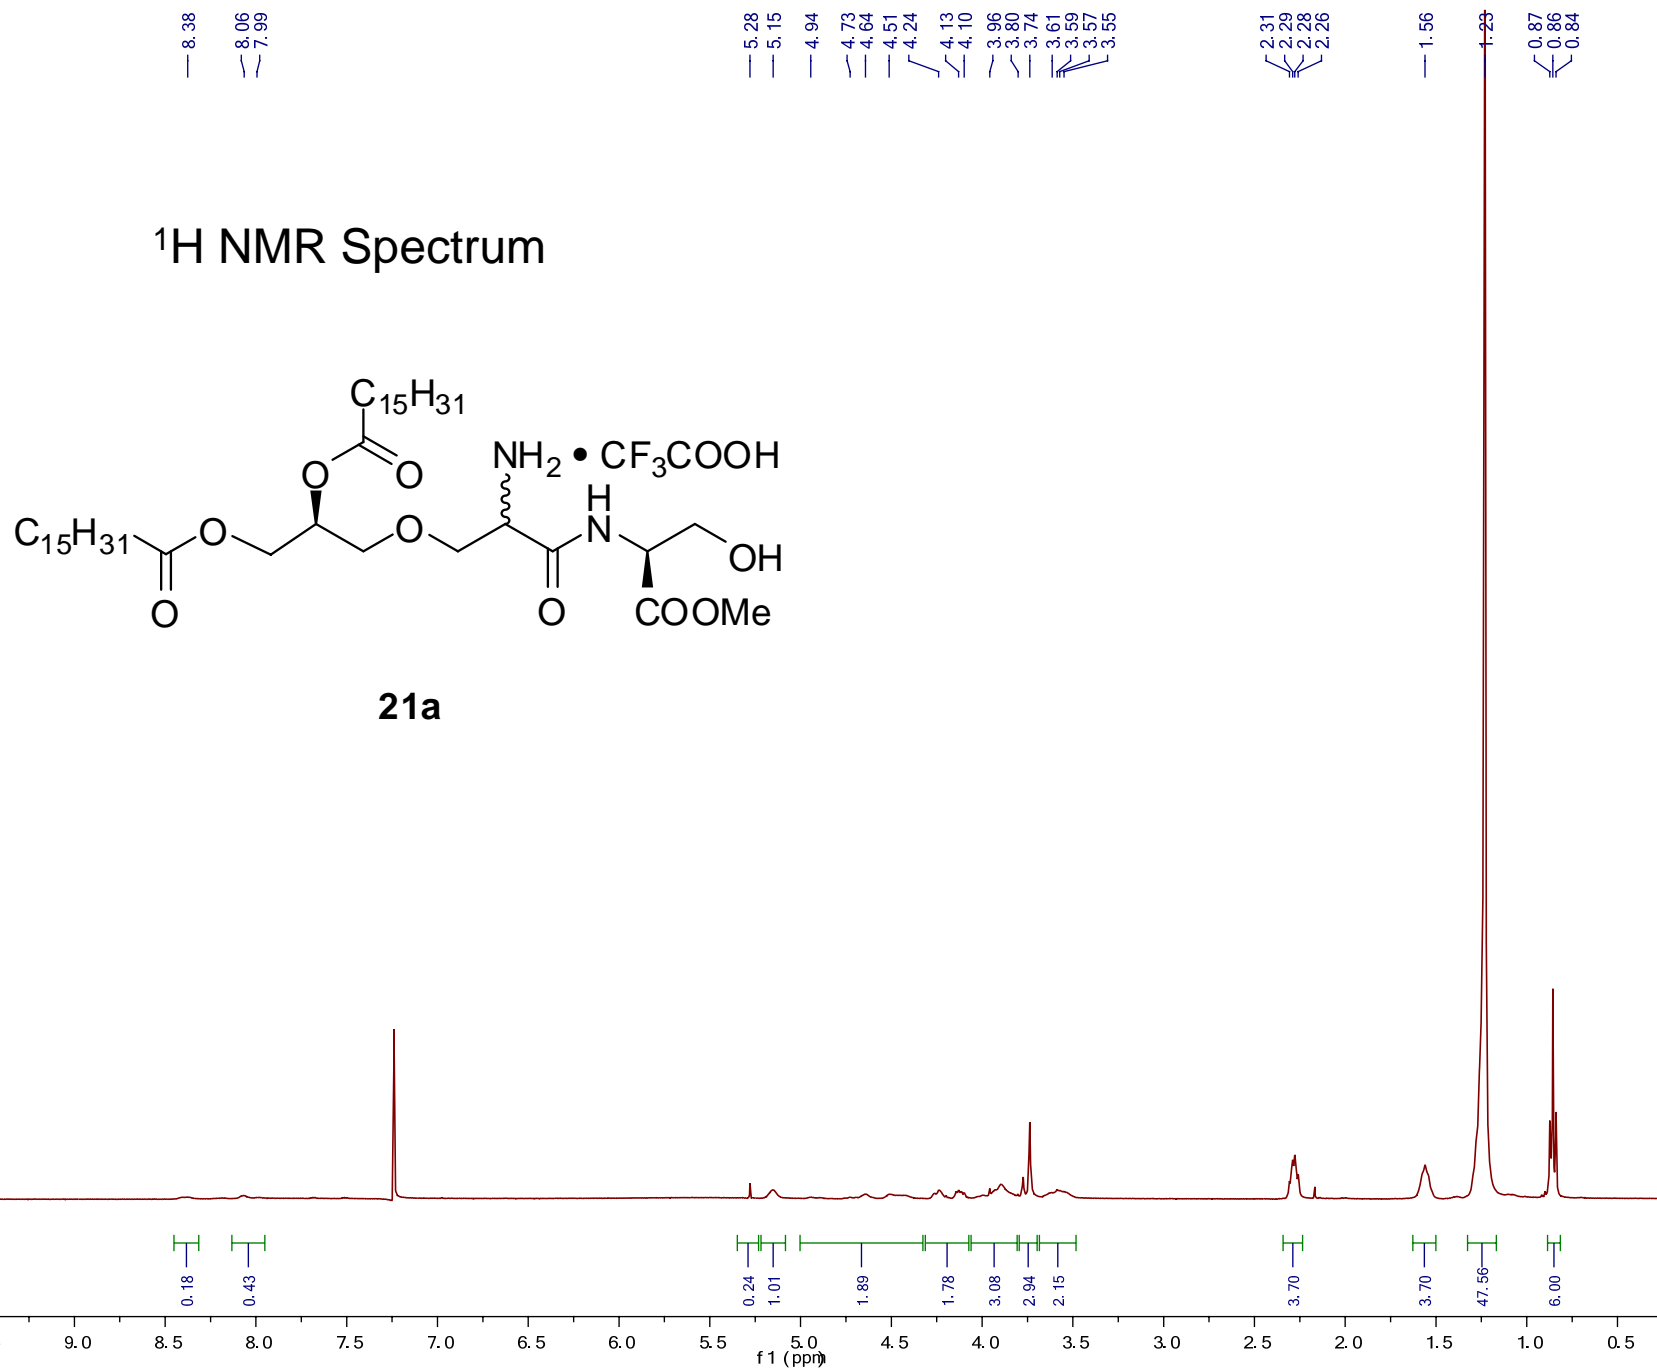

172.76  
172.47  
172.41  
172.34  
— 168.73

### <sup>13</sup>C NMR Spectrum

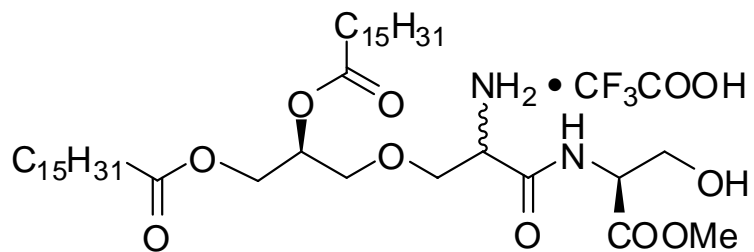

**21a**

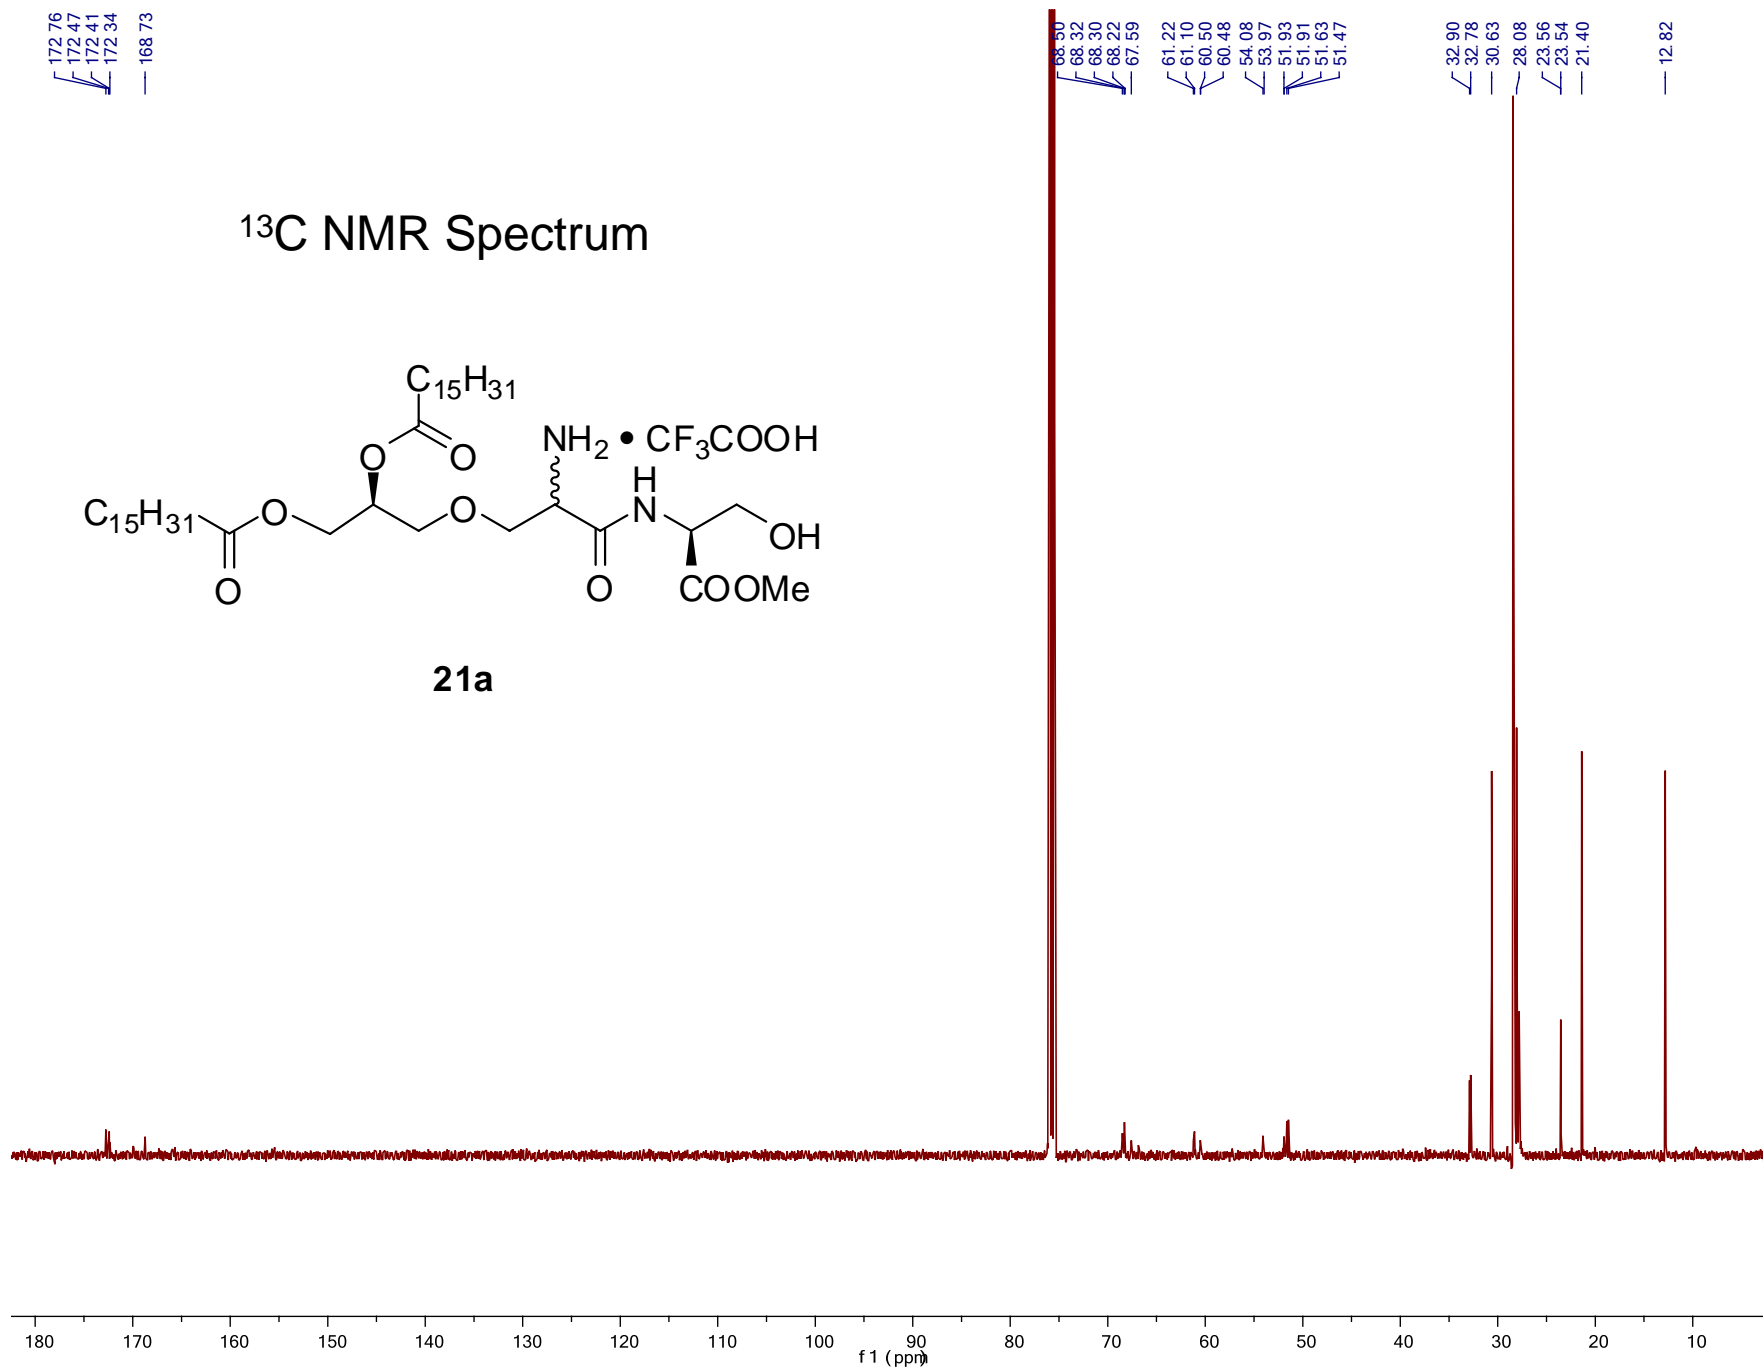



— 8.33

— 8.04

— 5.28

— 5.15

— 4.79

— 4.65

— 4.52

— 4.24

— 4.13

— 3.90

— 3.74

— 3.59

2.31  
2.29  
2.28  
2.26

— 1.56

— 1.23

0.87  
0.86  
0.84

# <sup>1</sup>H NMR Spectrum

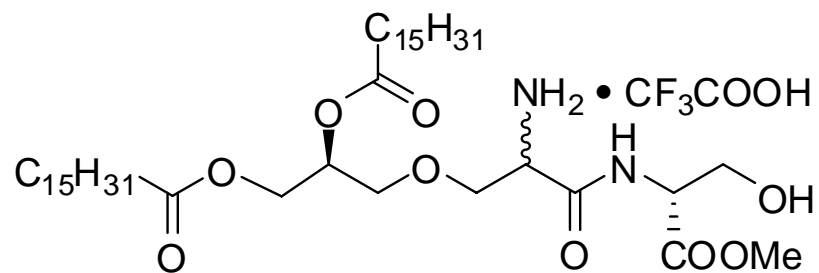**21b**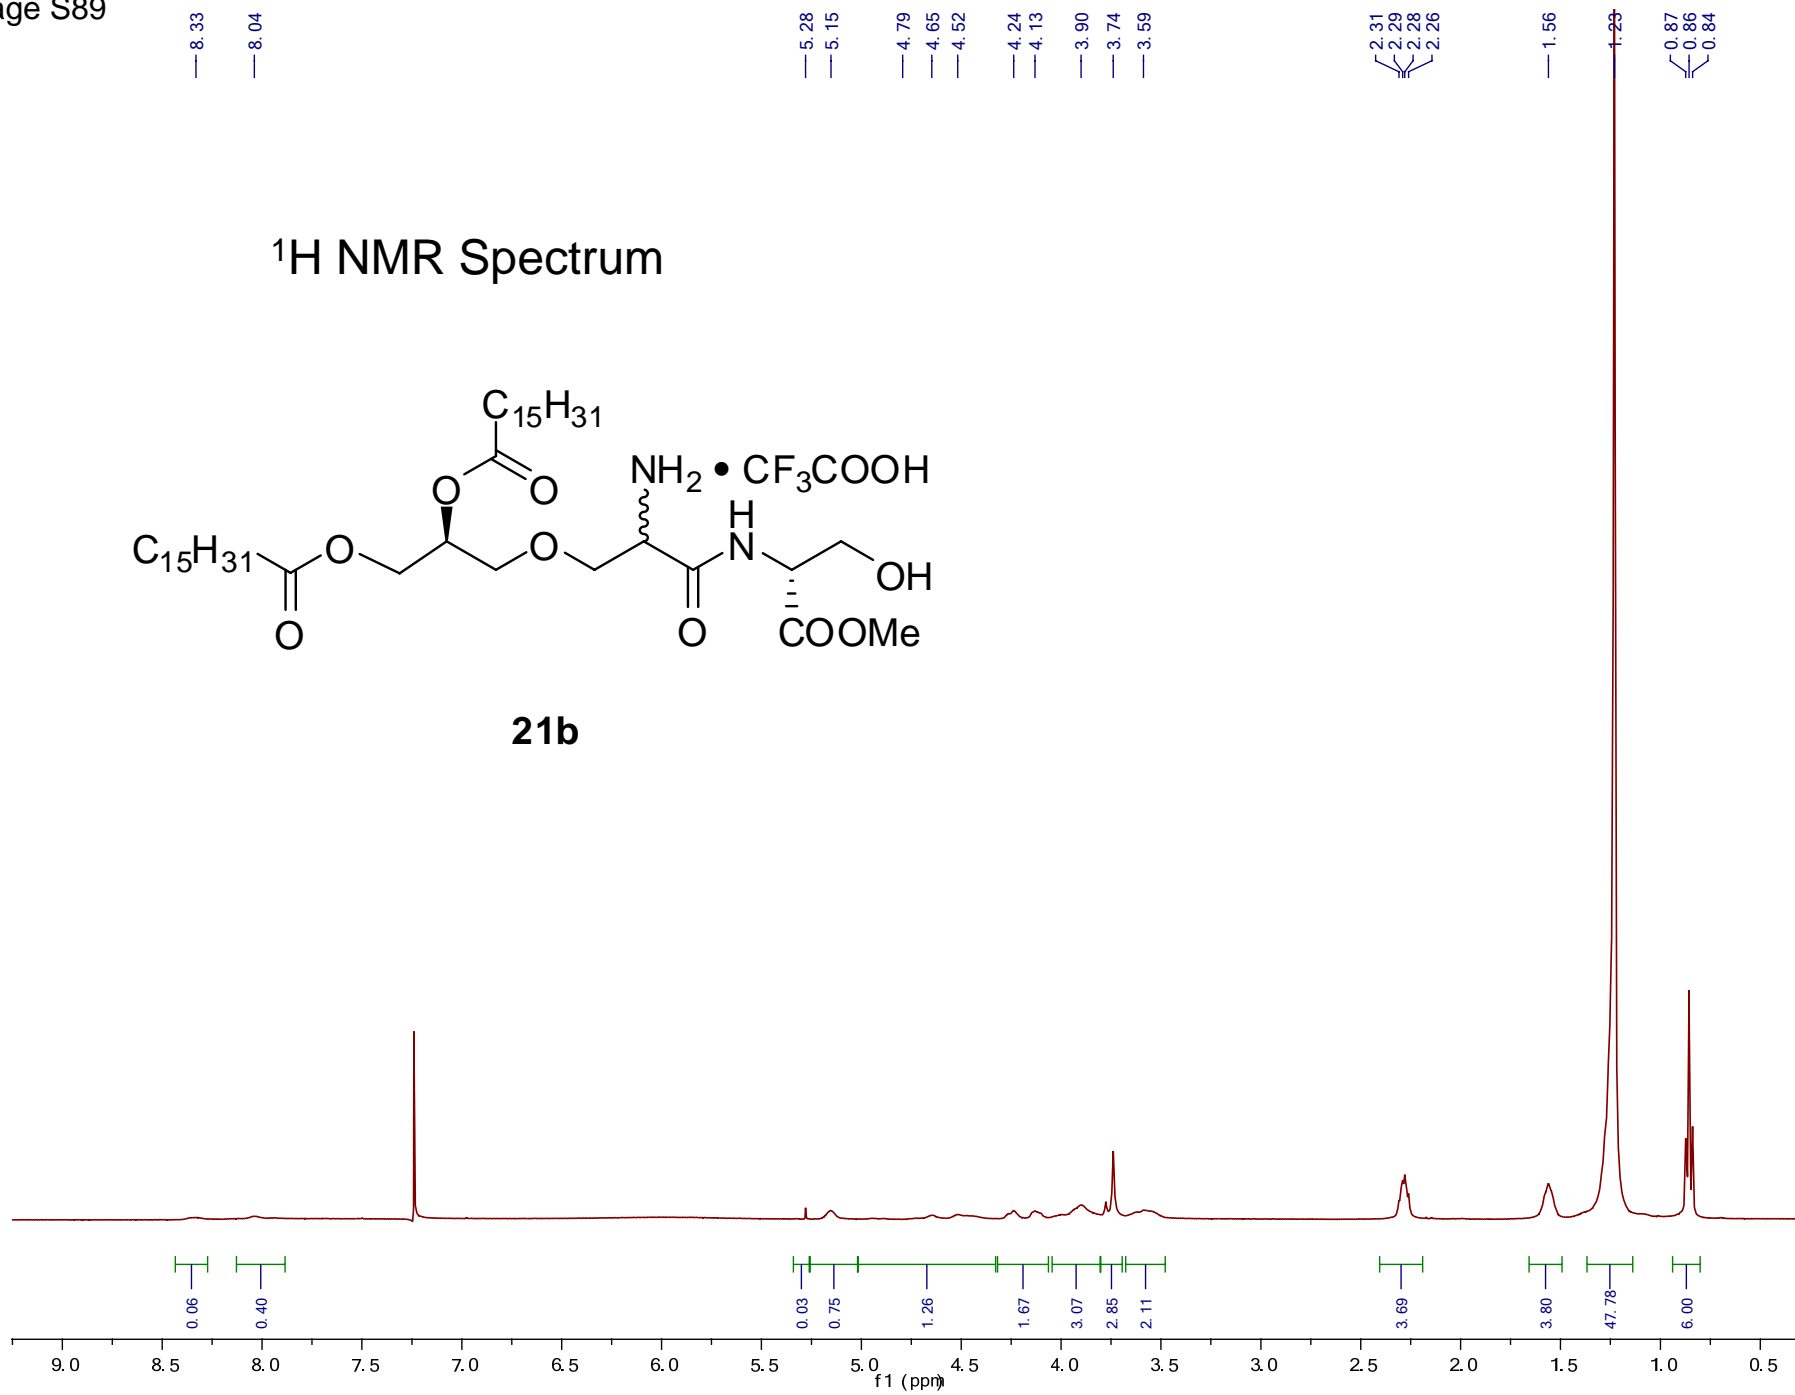

172.11  
171.82  
171.76  
171.69  
168.06

### <sup>13</sup>C NMR Spectrum

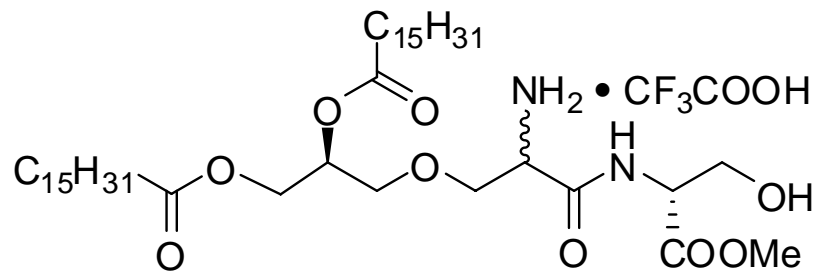

**21b**

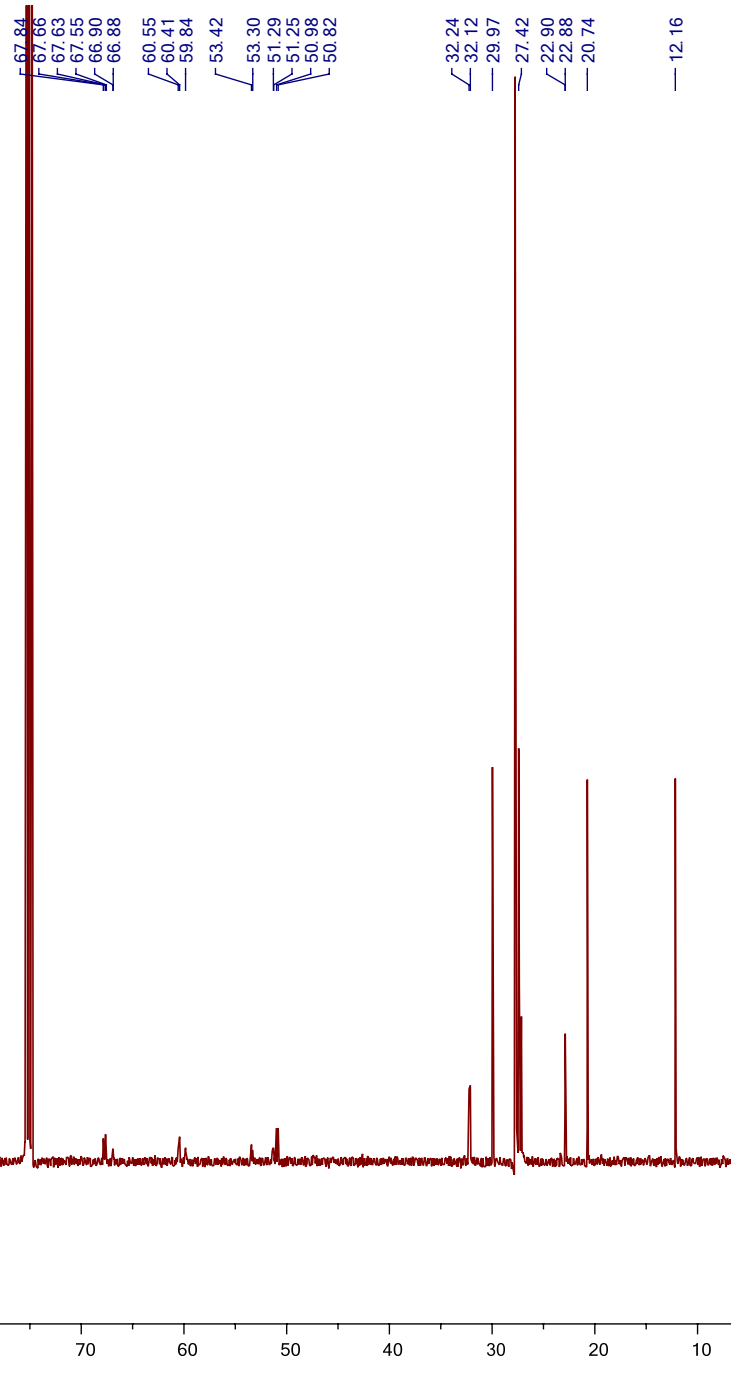

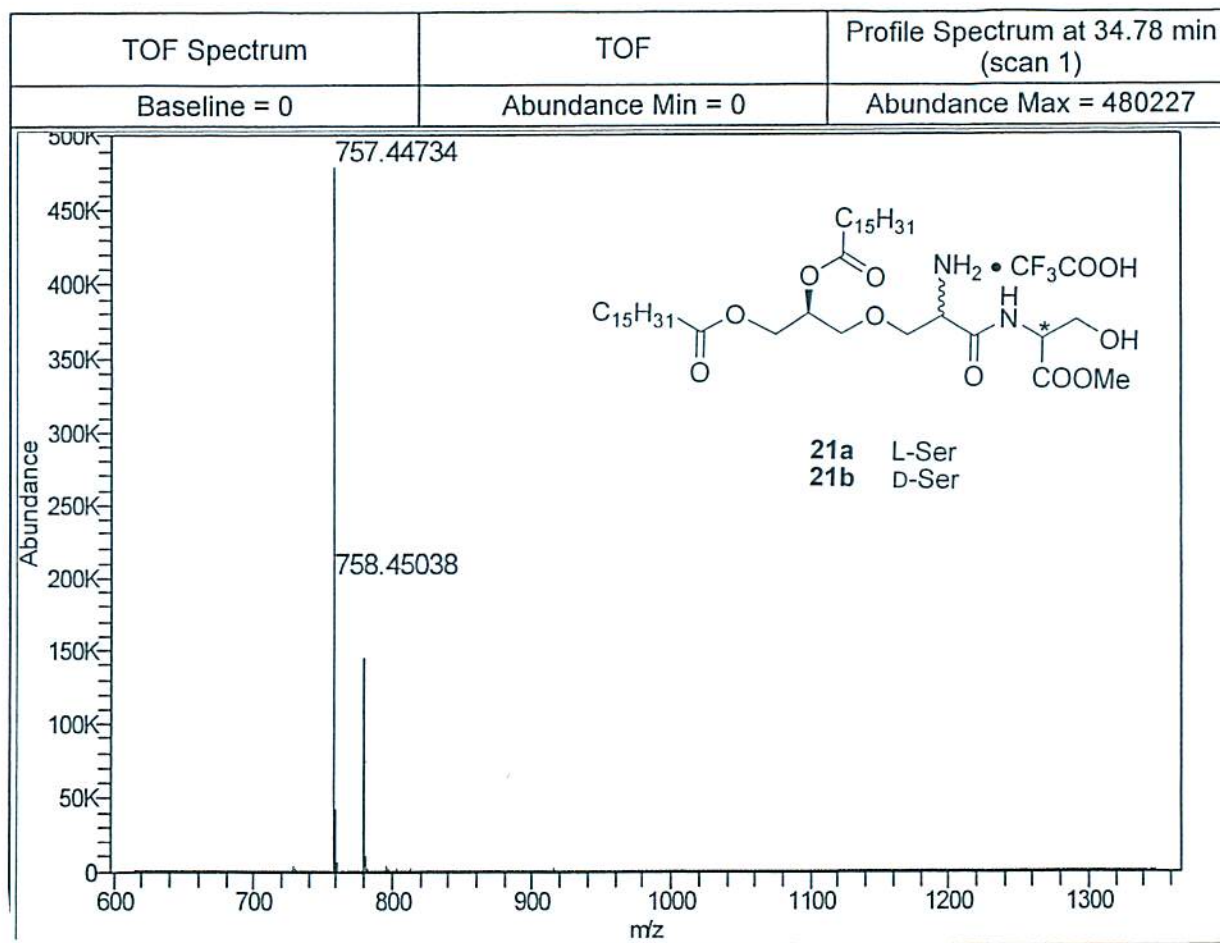

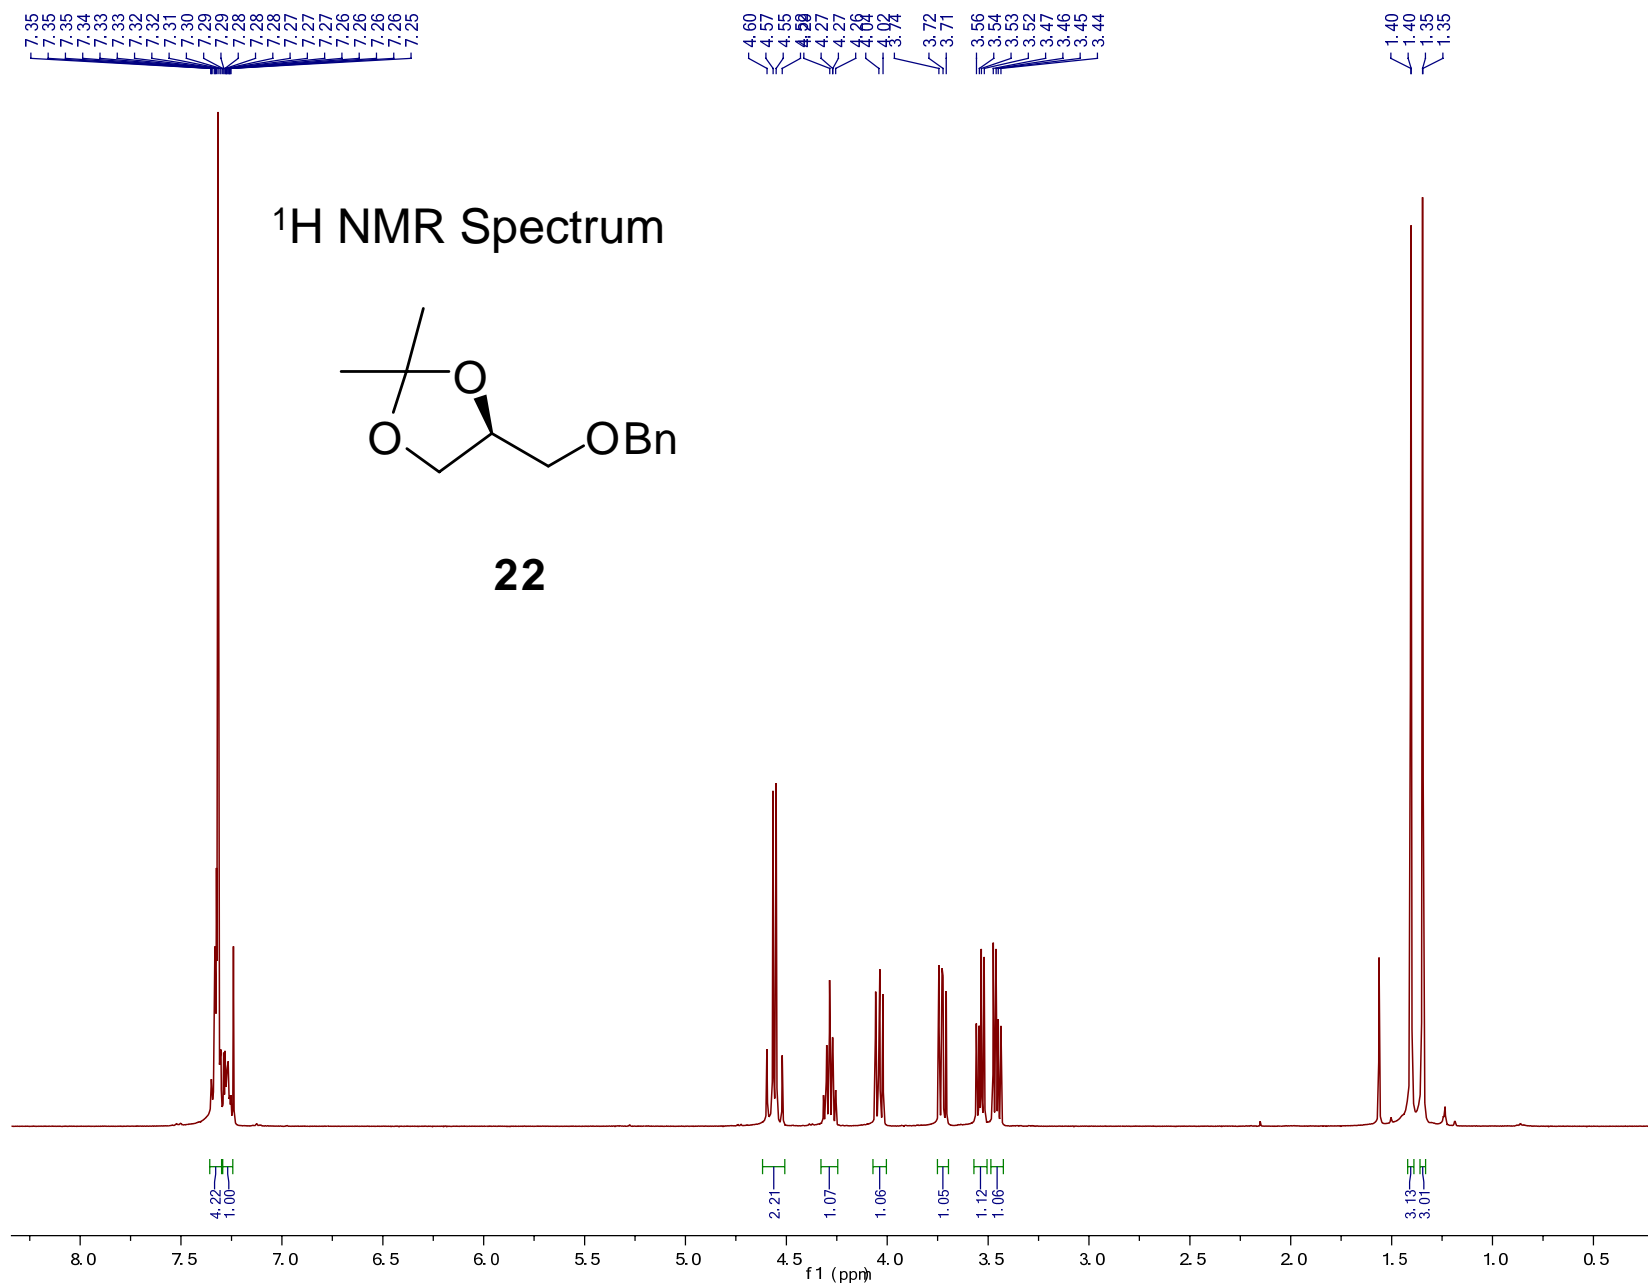

— 136.87

127.39  
126.73  
126.71

— 108.39

— 73.68

— 72.47

— 70.00

— 65.81

— 25.74

— 24.35

# <sup>13</sup>C NMR Spectrum

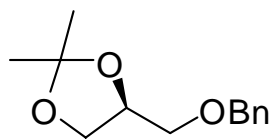**22**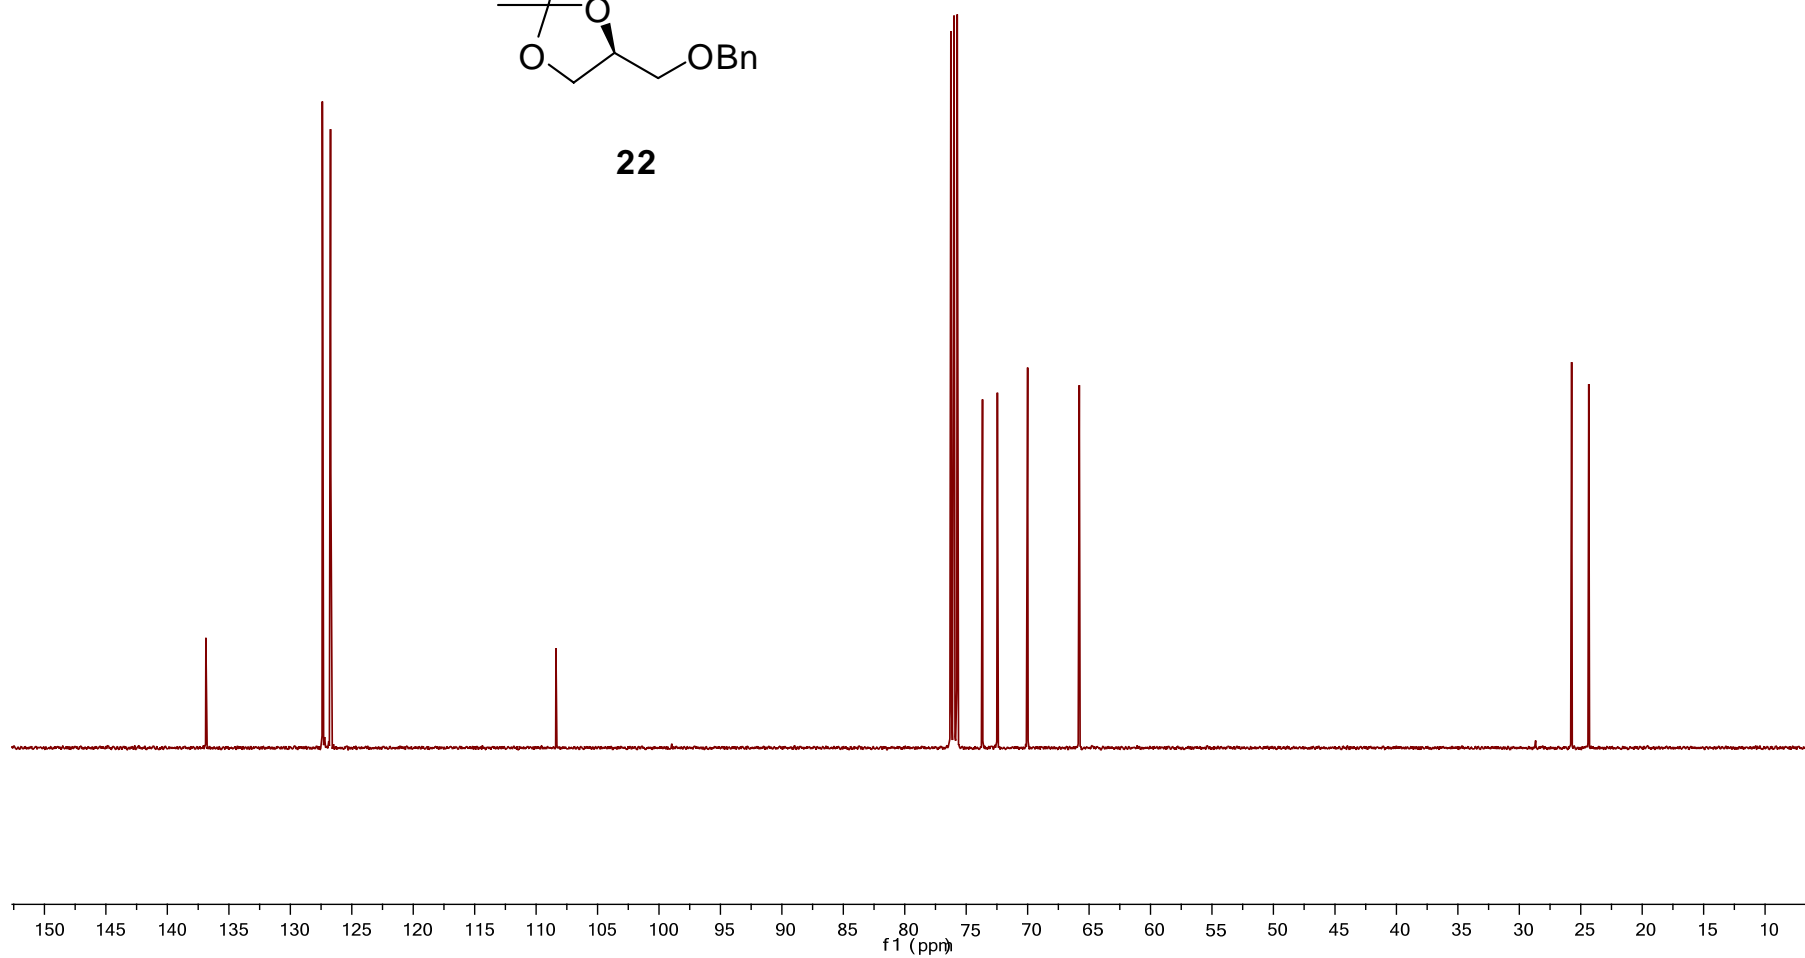

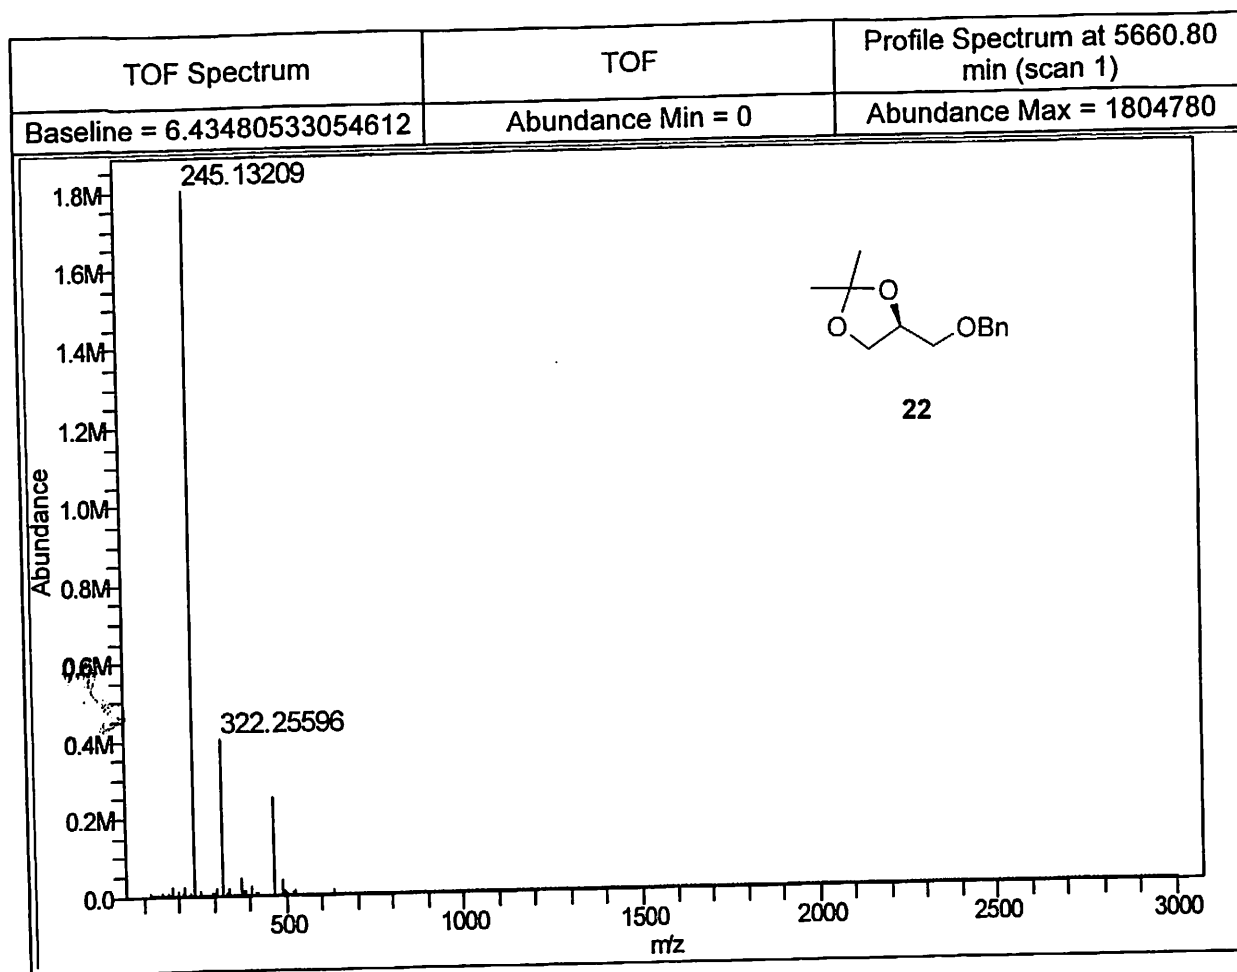

7.32  
7.31  
7.27  
7.26  
7.25  
7.24

4.54

3.59  
3.58  
3.56  
3.55  
3.53  
3.52  
3.51  
3.50  
3.49  
3.48  
3.47  
3.42  
3.41  
3.39

1.56  
1.55  
1.53  
1.51  
1.28  
1.23

0.88  
0.86  
0.84

# $^1\text{H}$ NMR Spectrum

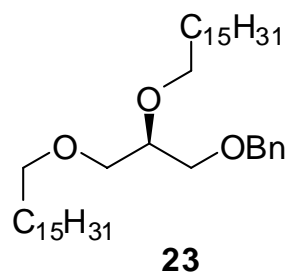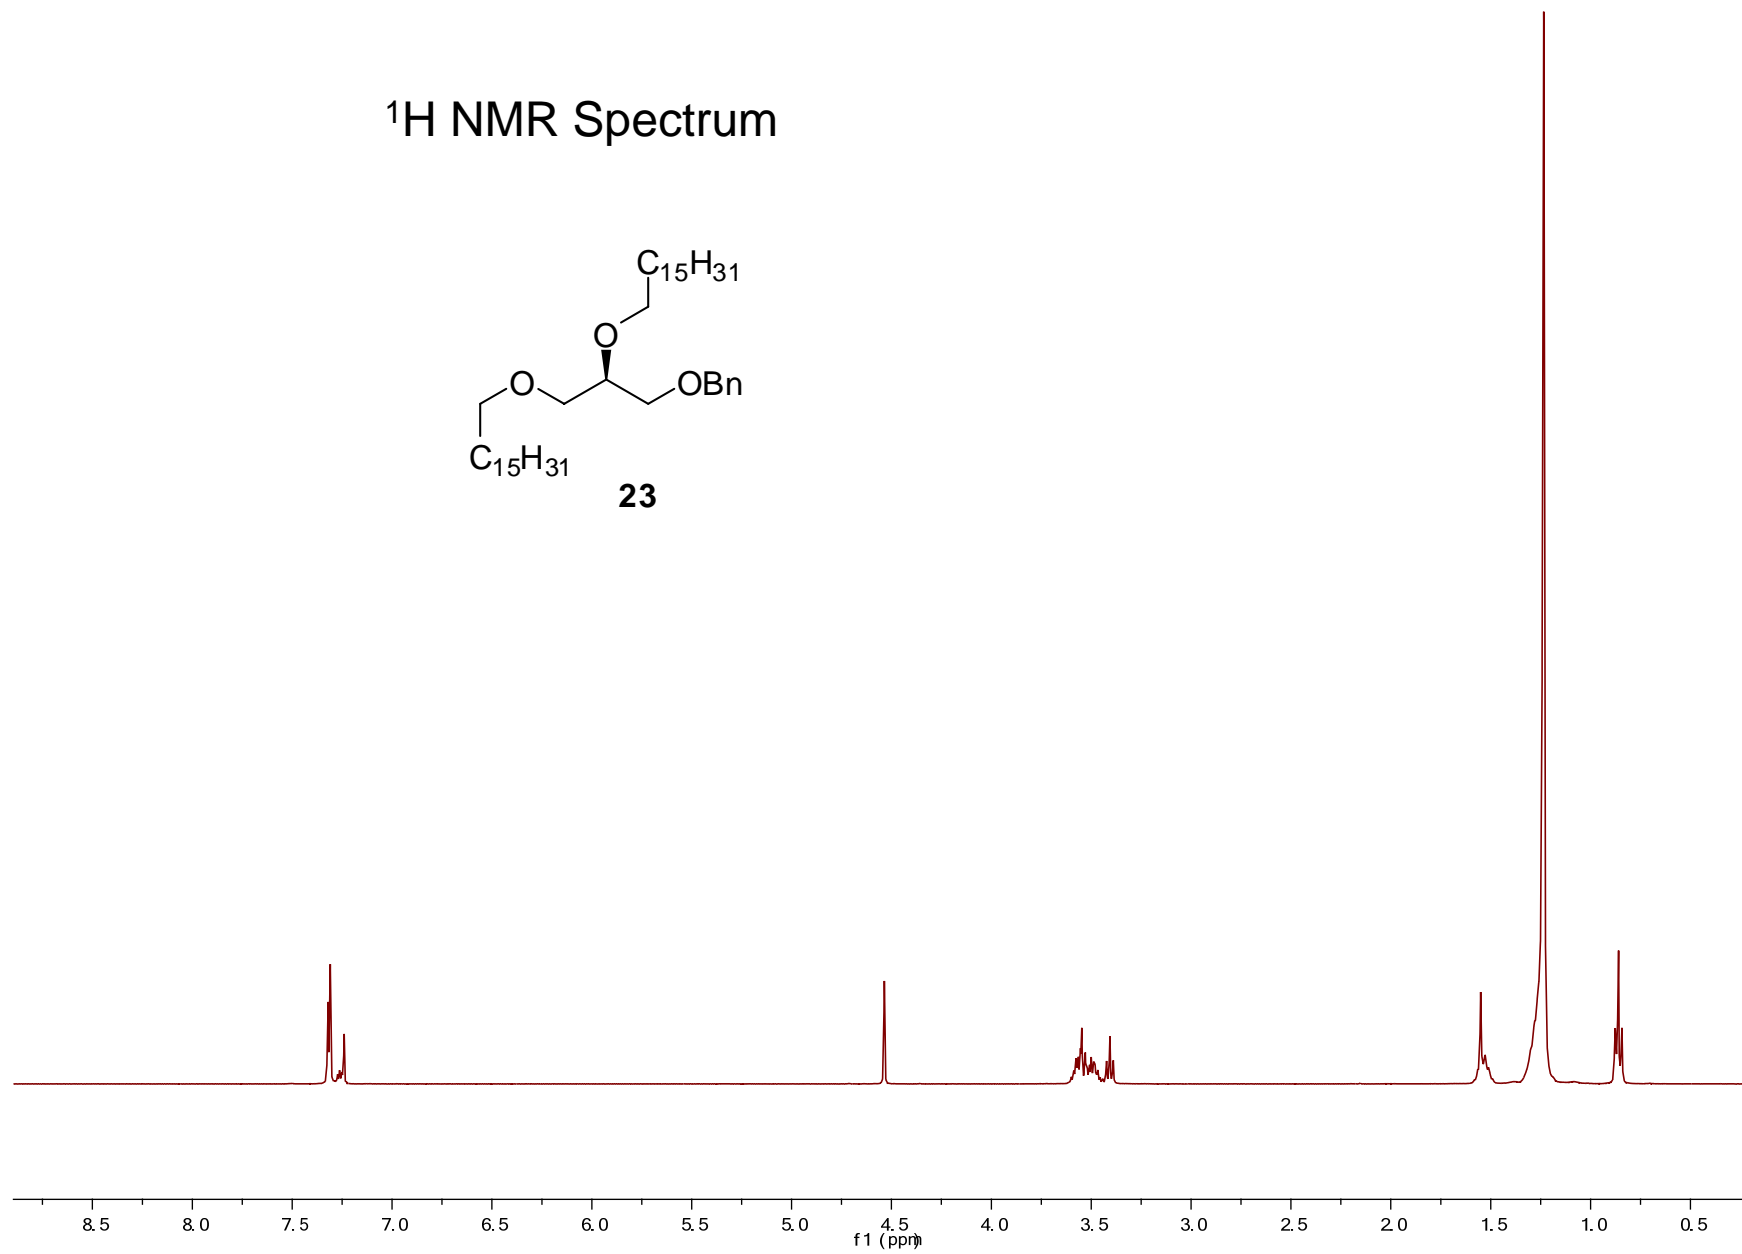

— 138.42

128.31  
127.58  
127.50

— 77.88

73.34  
71.66  
70.69  
70.62  
70.24

— 31.93

— 29.38

26.12  
26.10

— 22.70

— 14.14

 $^{13}\text{C}$  NMR Spectrum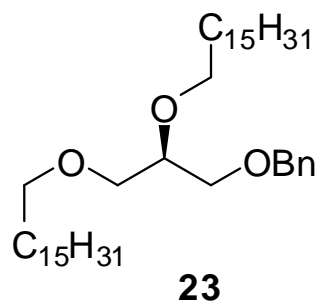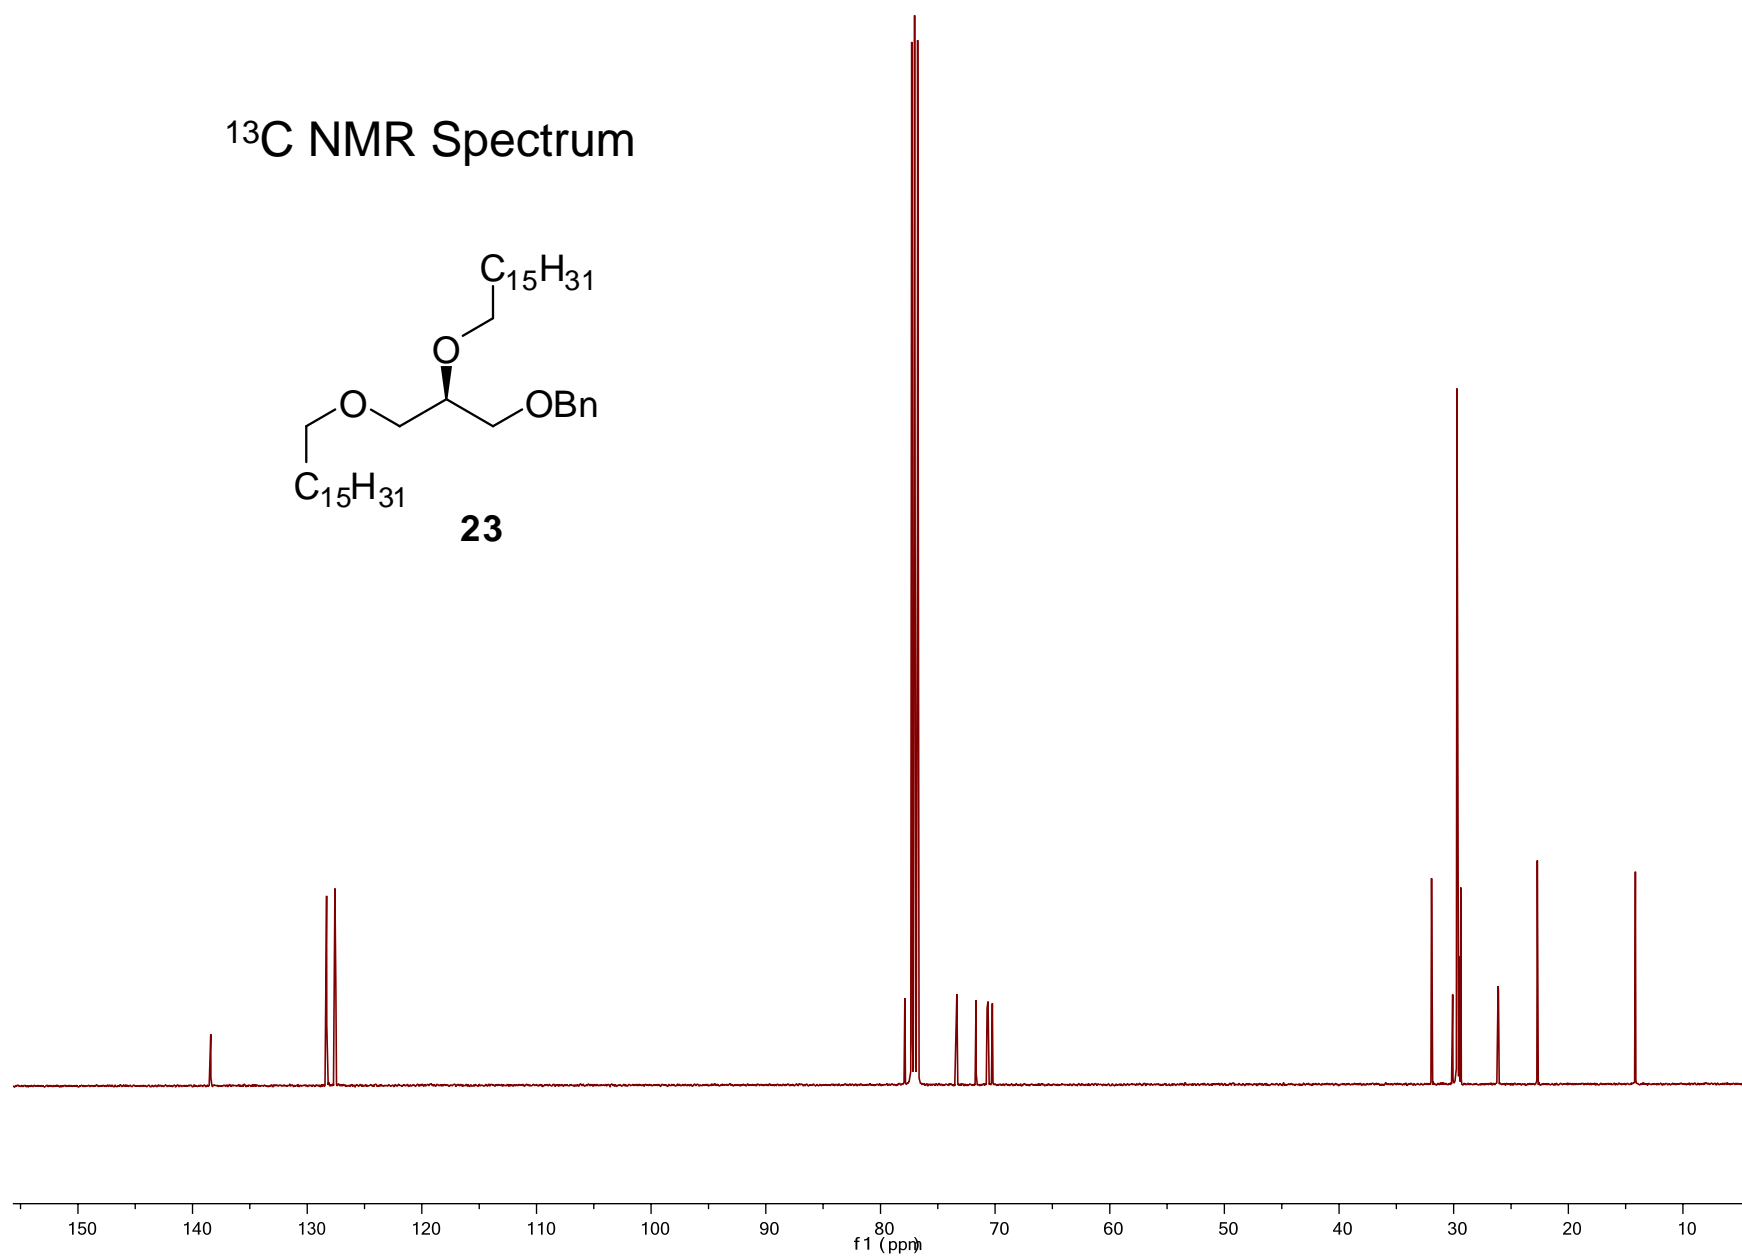



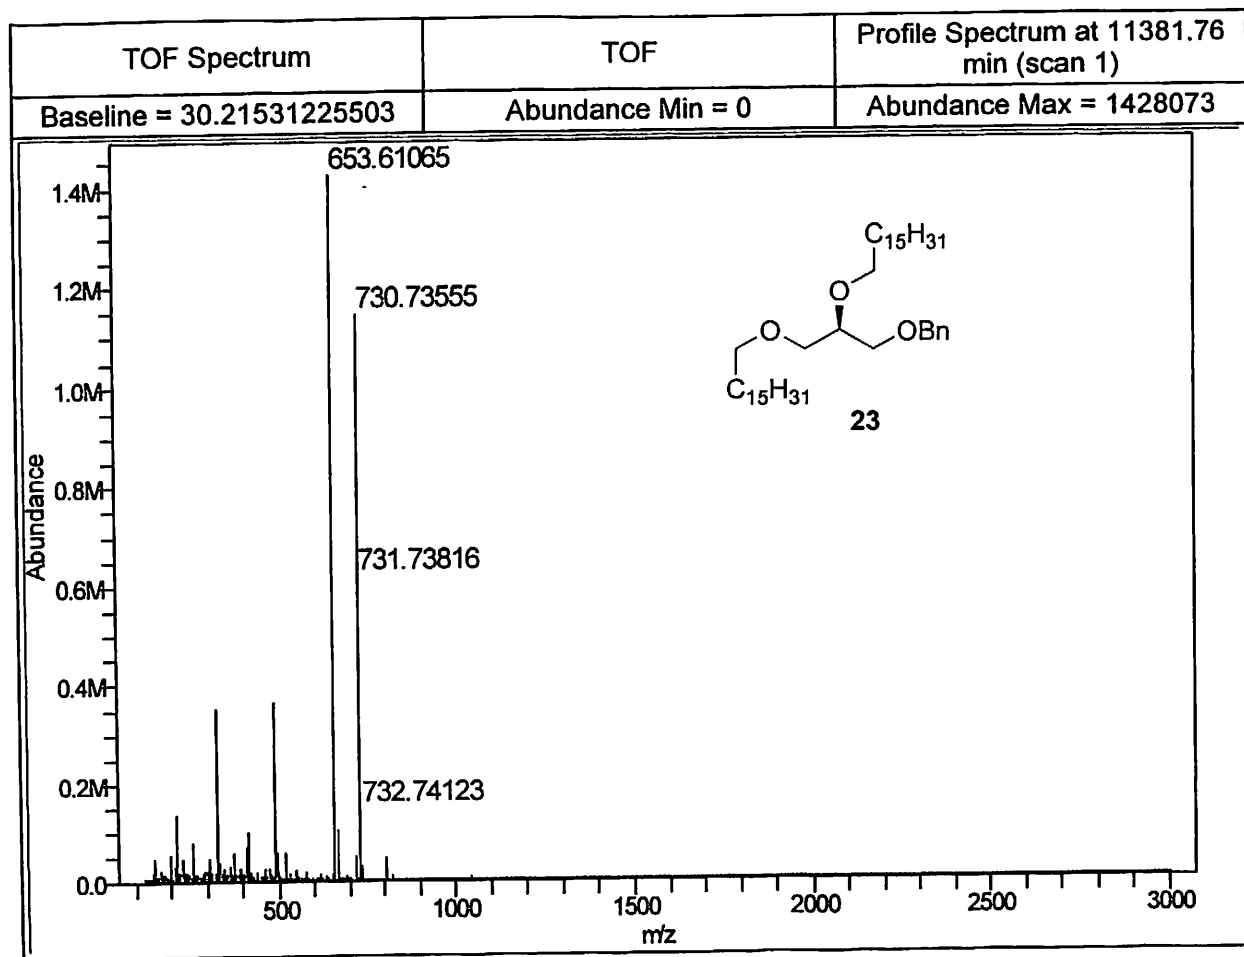

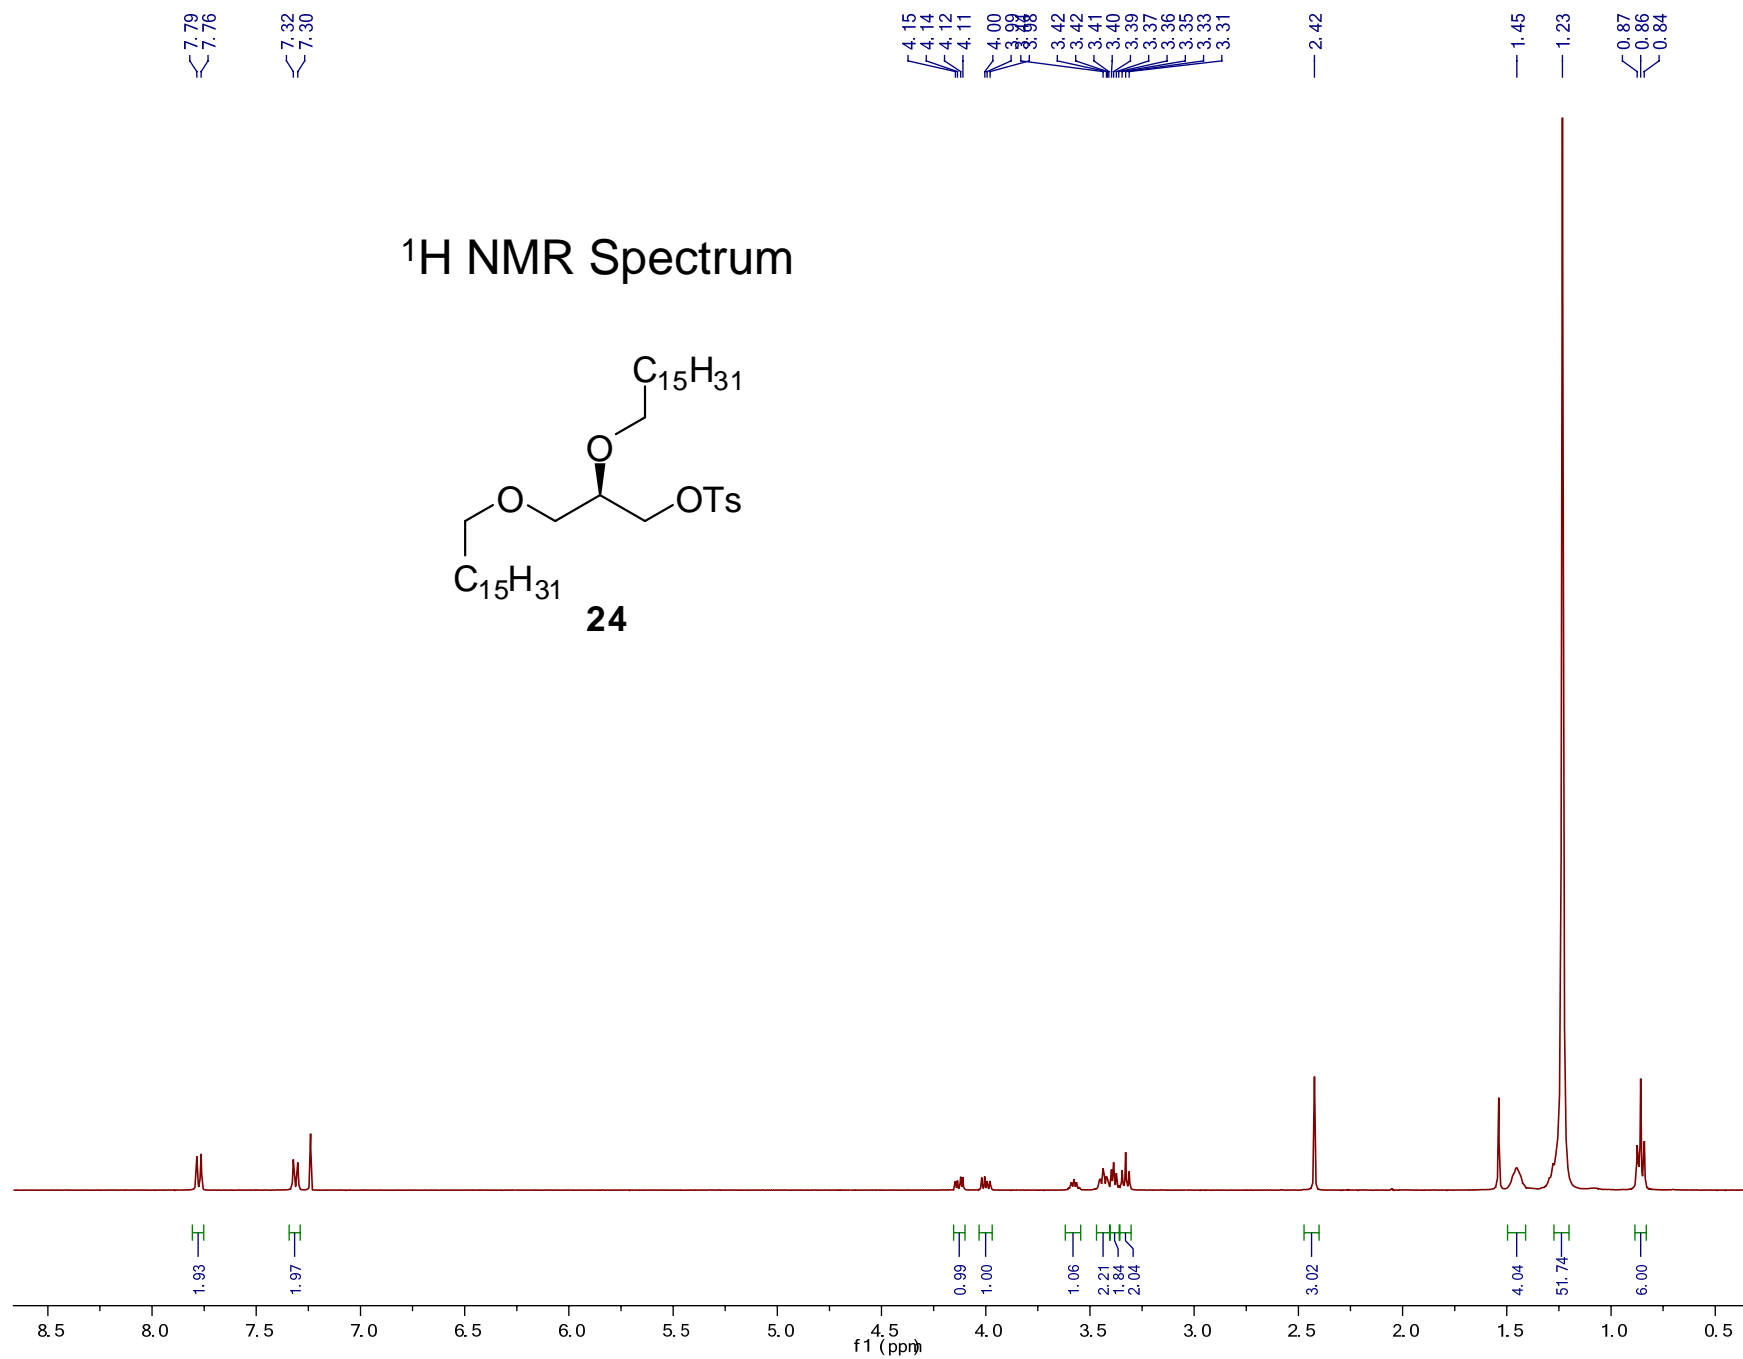

$^{13}\text{C}$  NMR Spectrum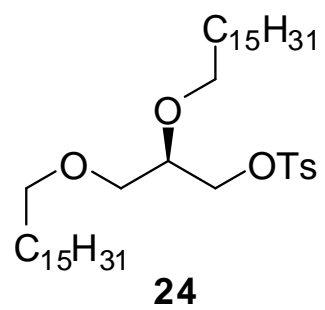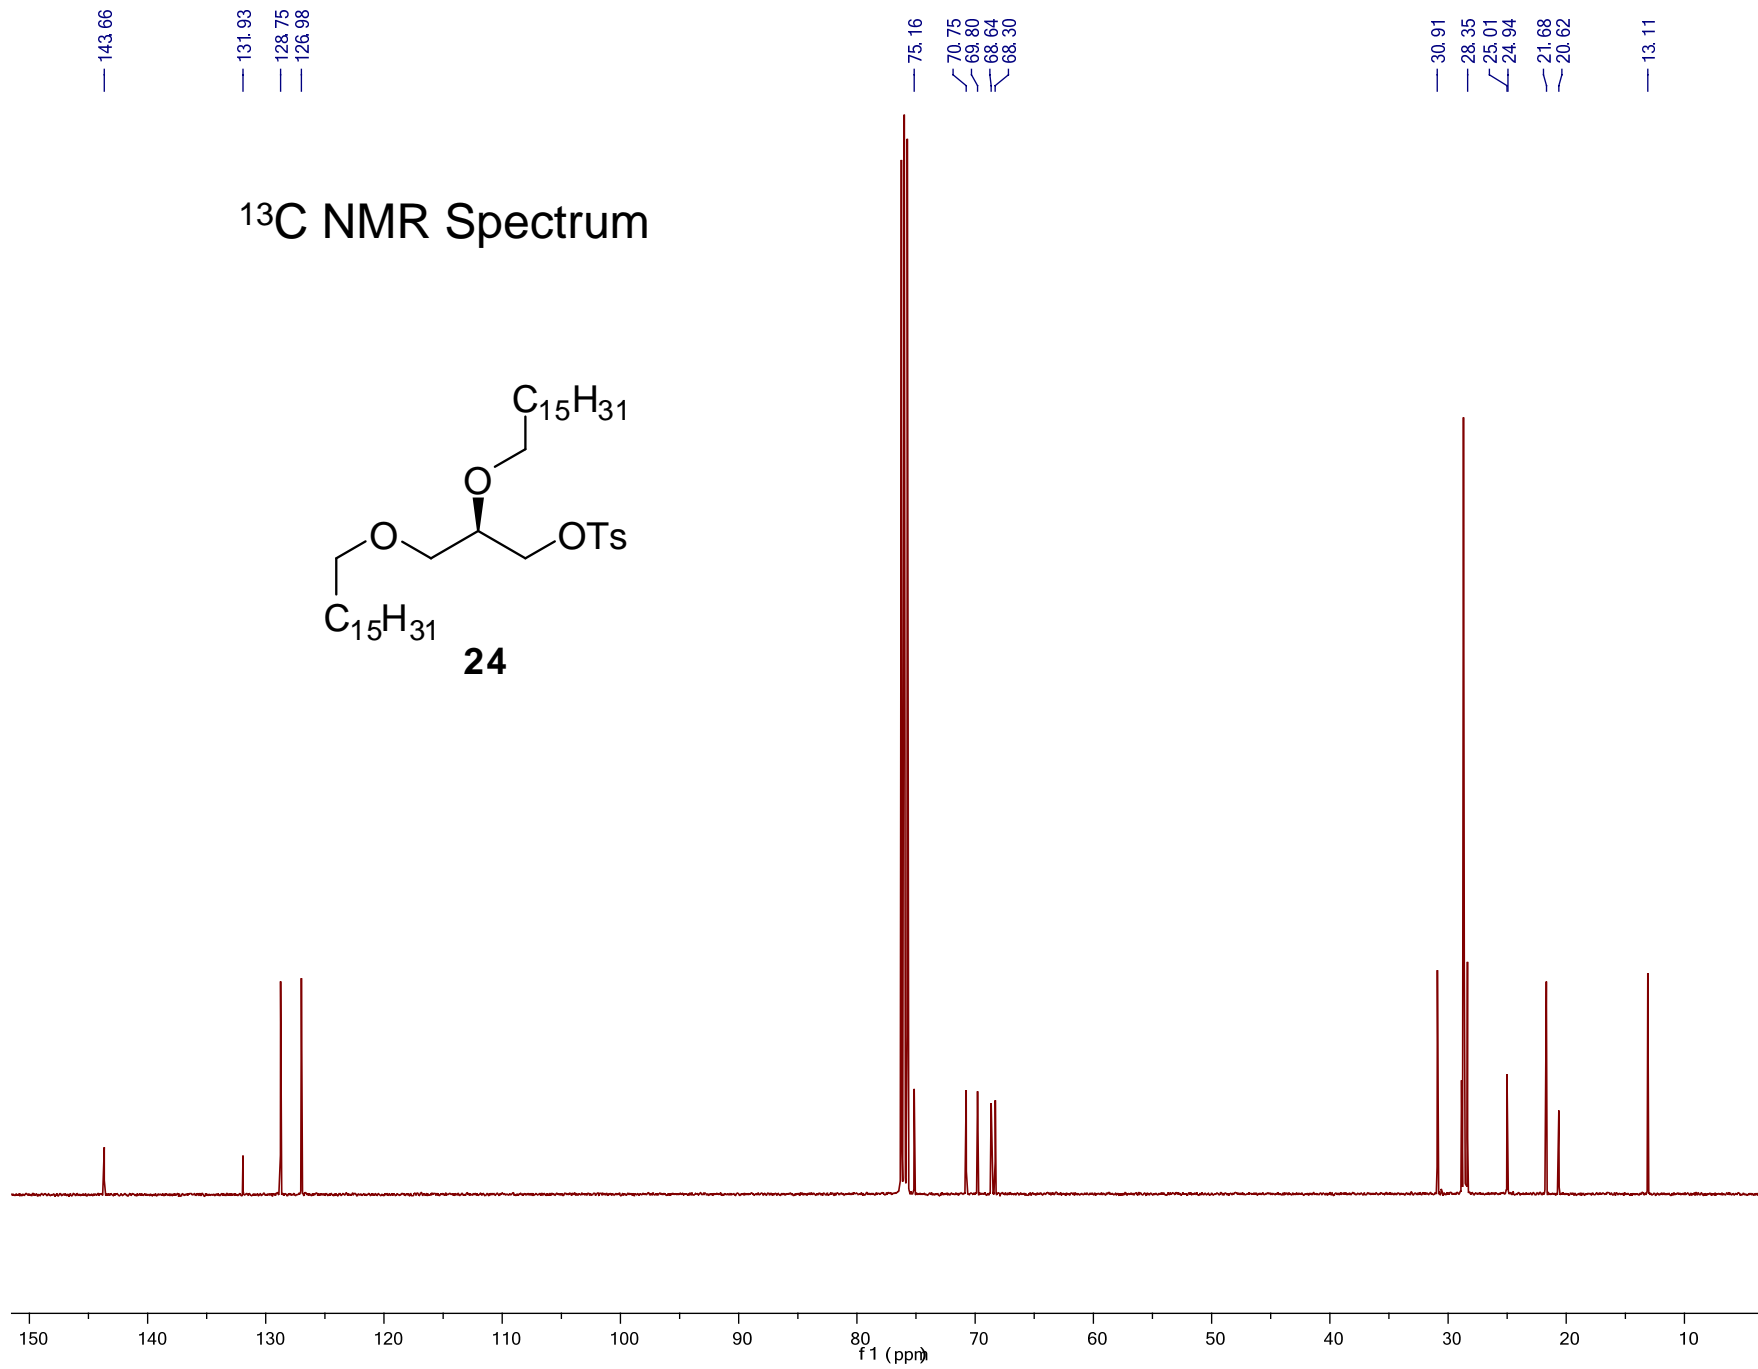

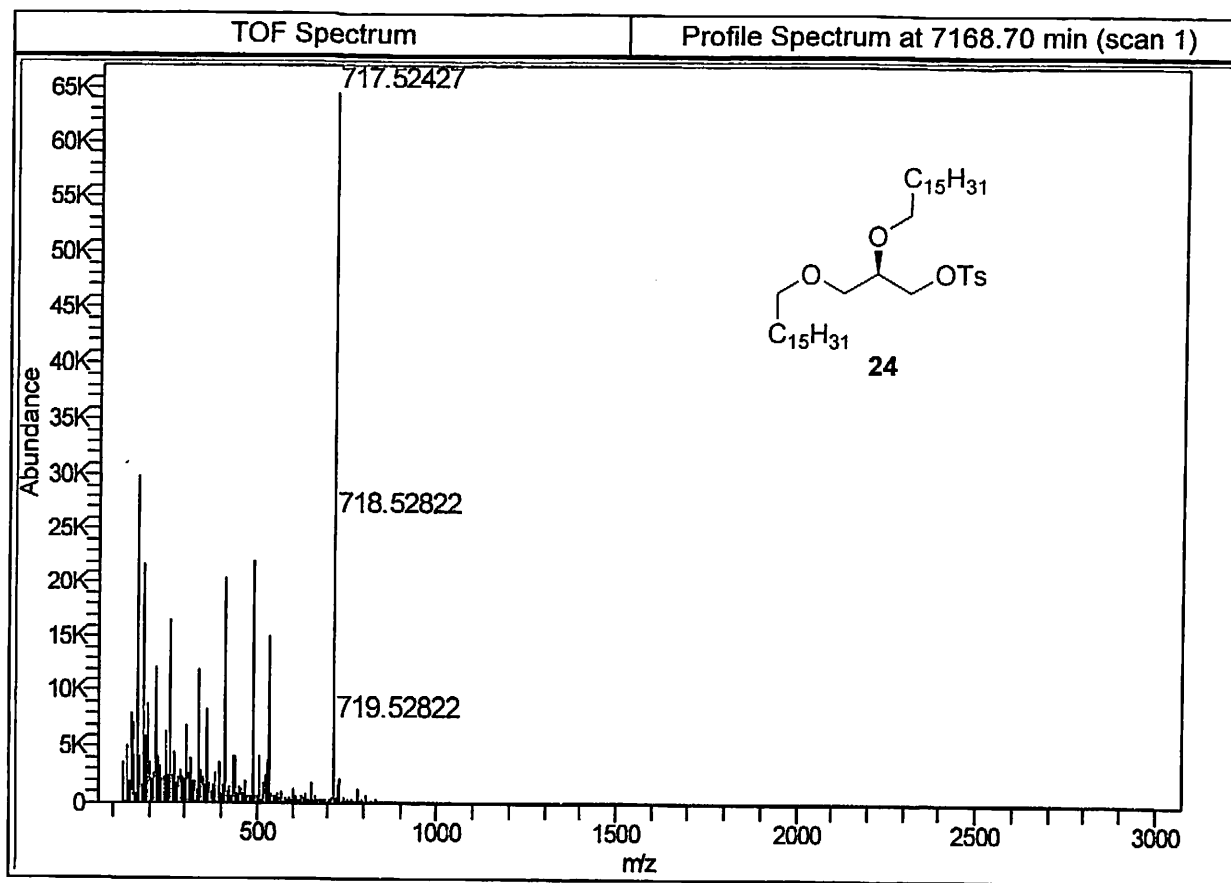

$^1\text{H}$  NMR Spectrum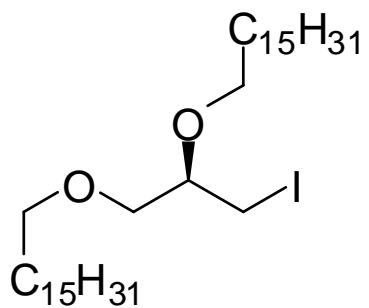

25

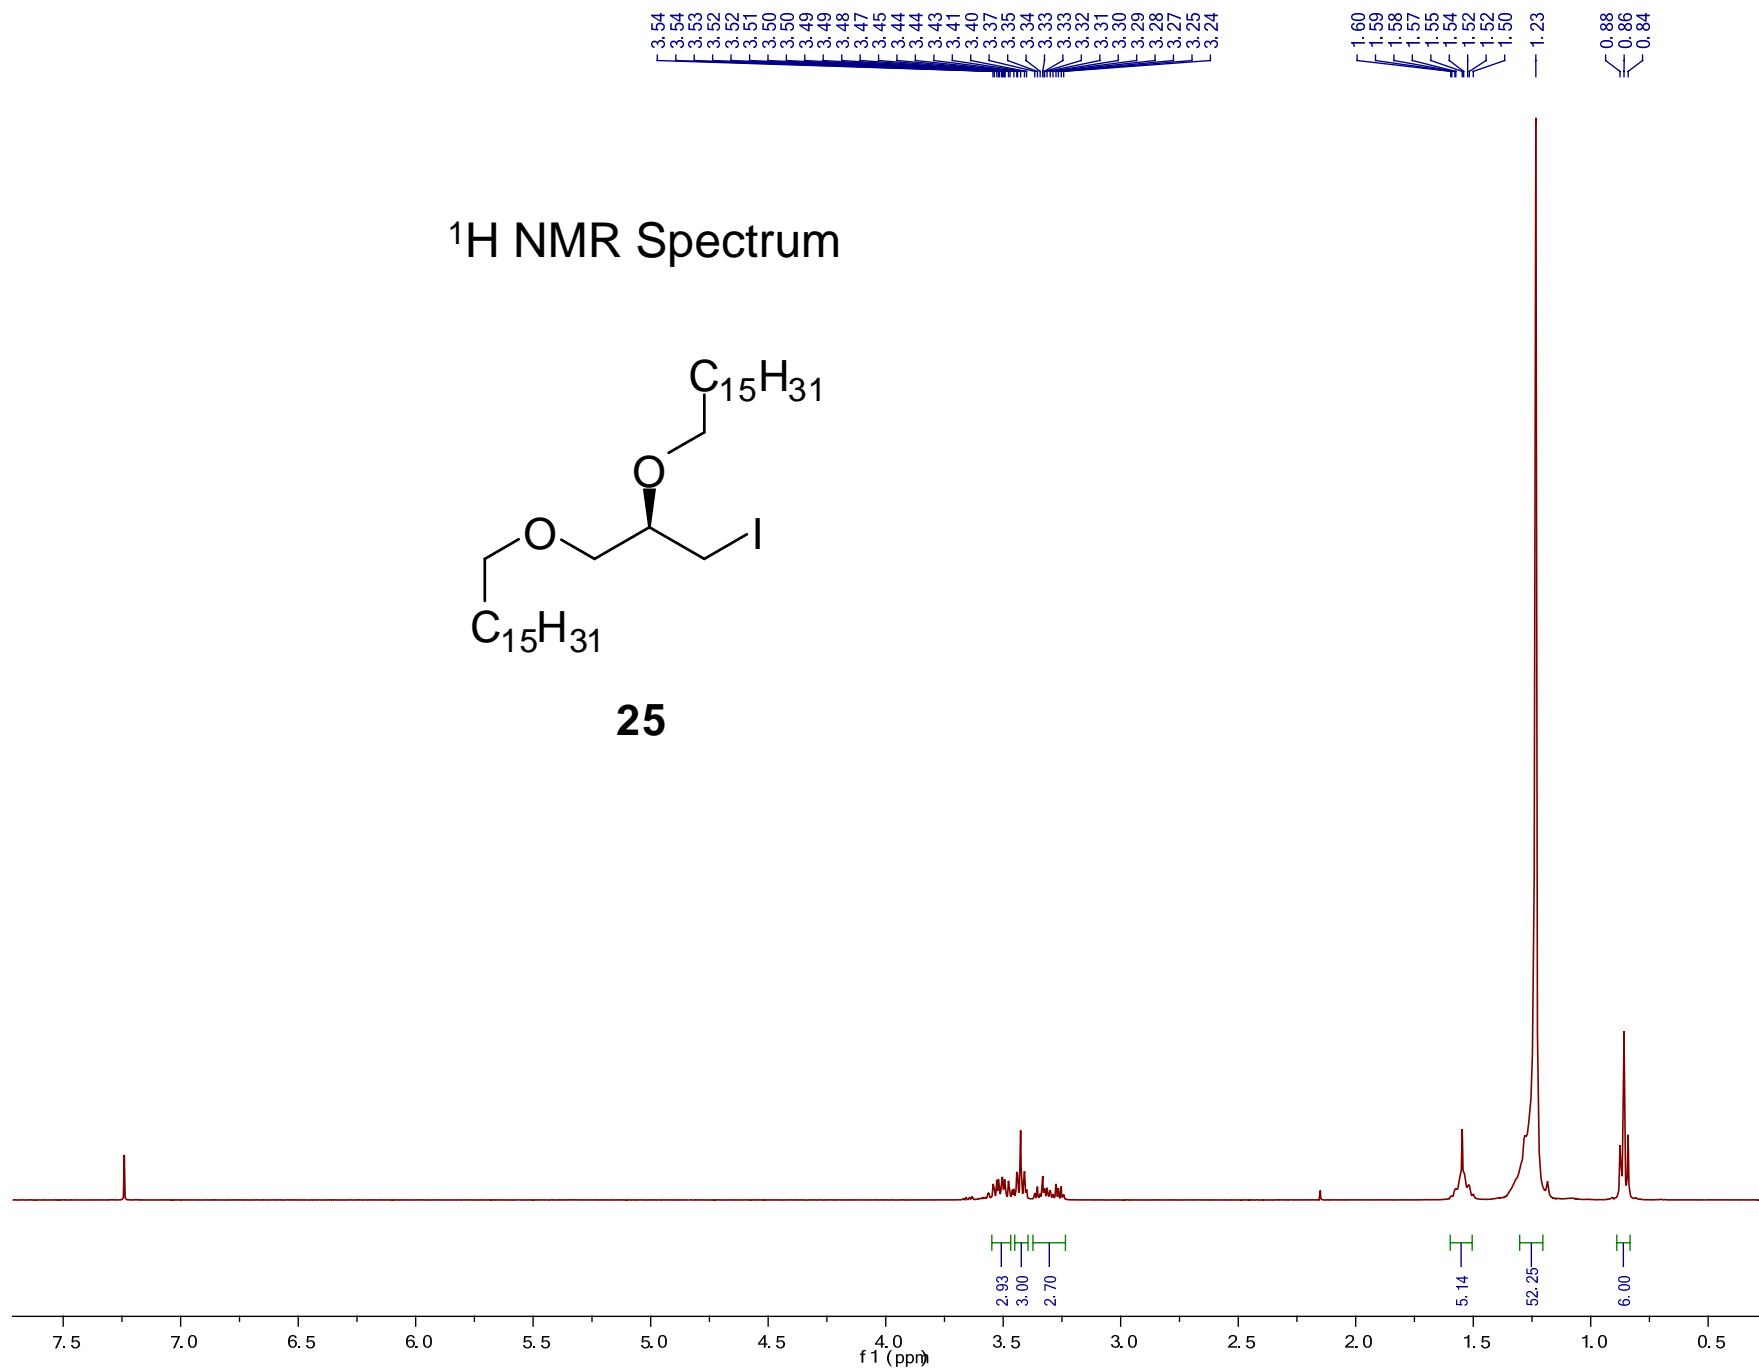

— 76.40  
— 70.86  
— 70.73  
— 69.25

### $^{13}\text{C}$ NMR Spectrum

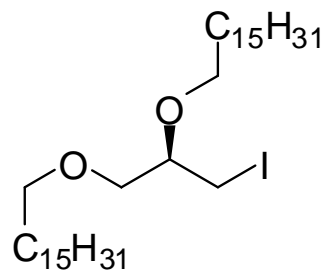

**25**

— 30.91  
— 28.69  
— 28.65  
— 28.45  
— 28.35  
— 25.09  
— 25.07  
— 21.68  
— 13.11  
— 6.39

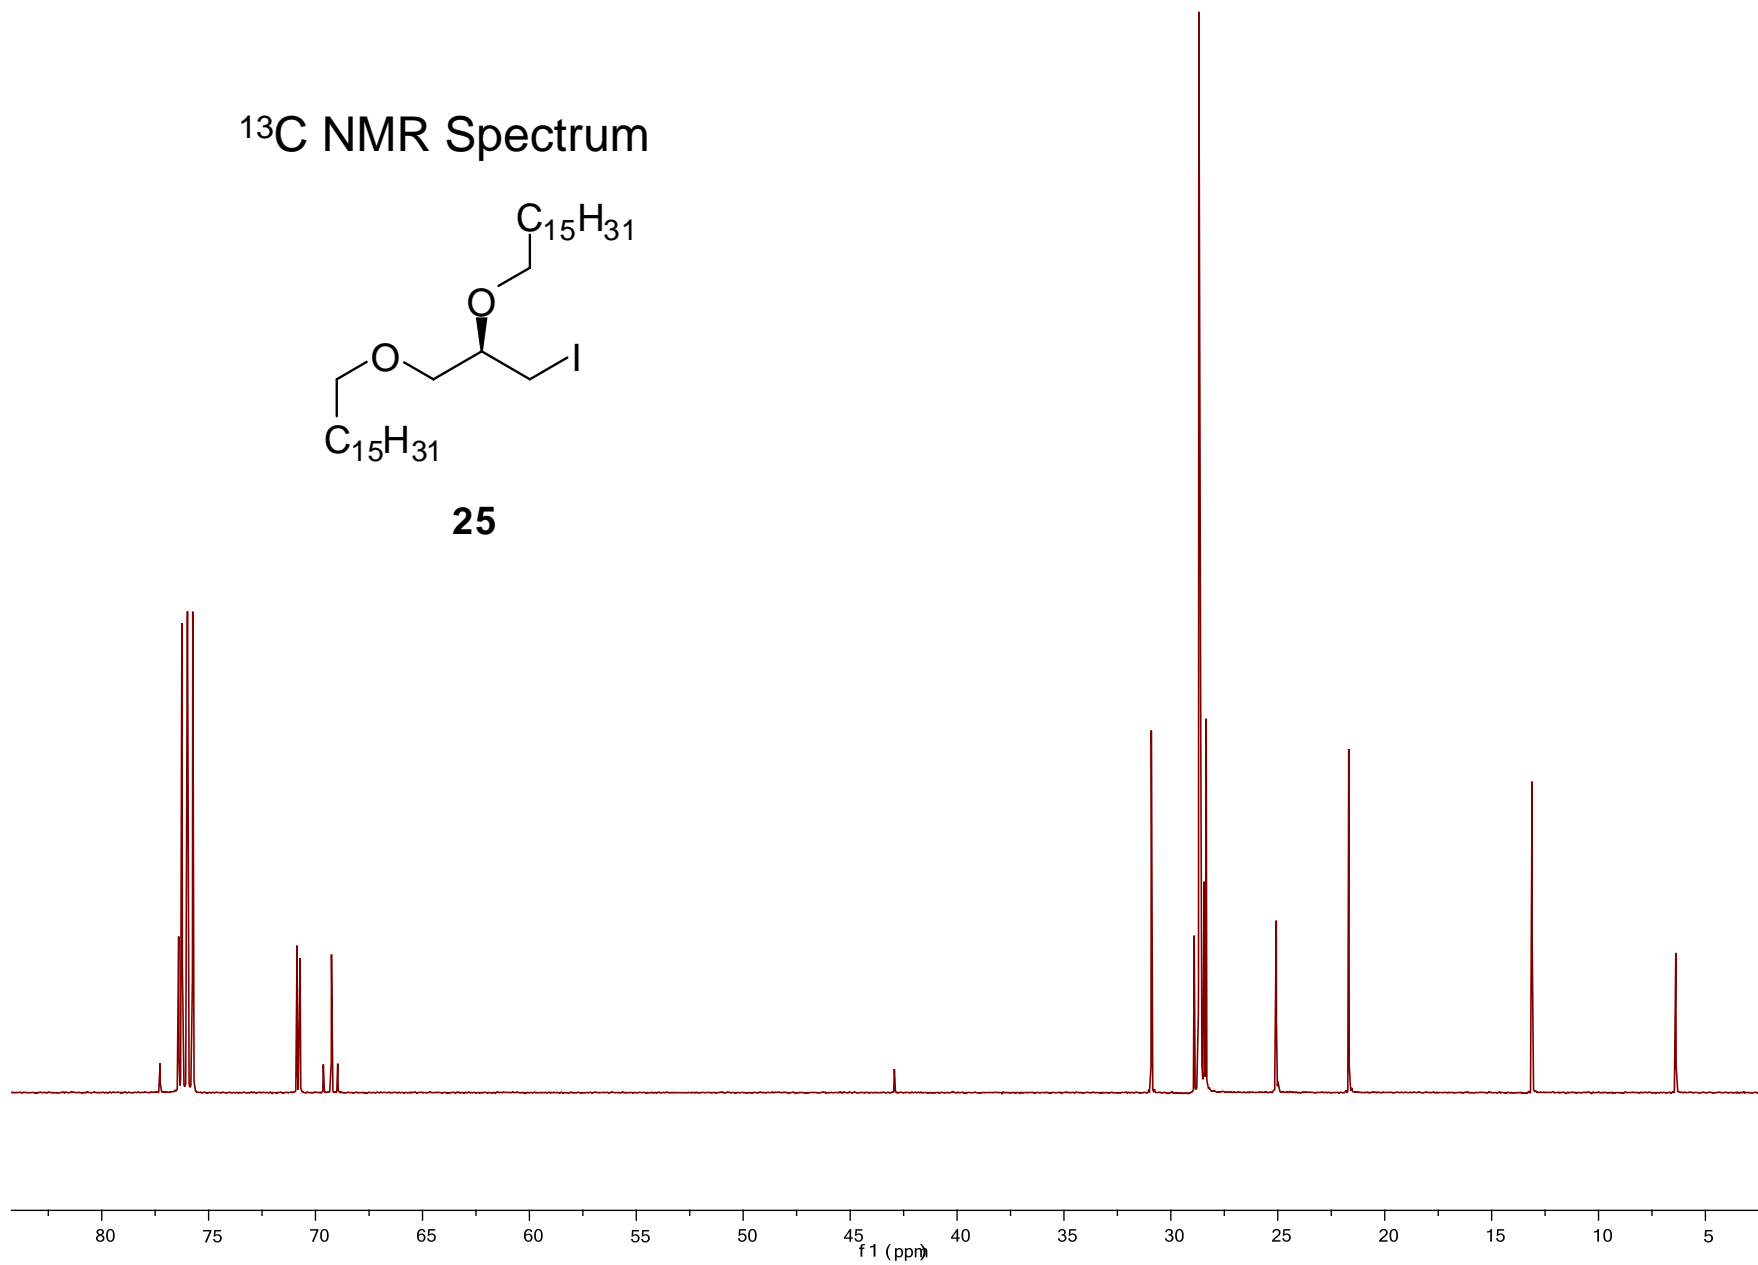

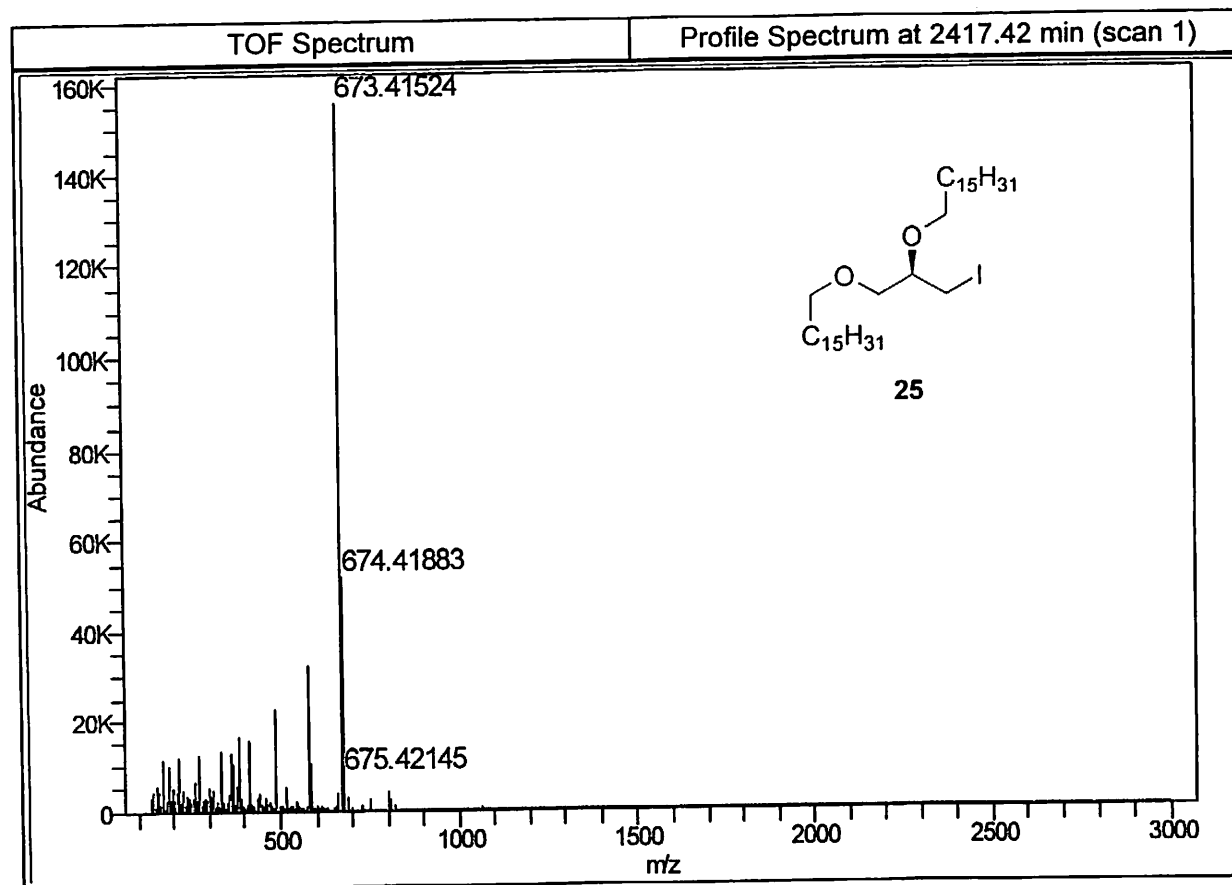







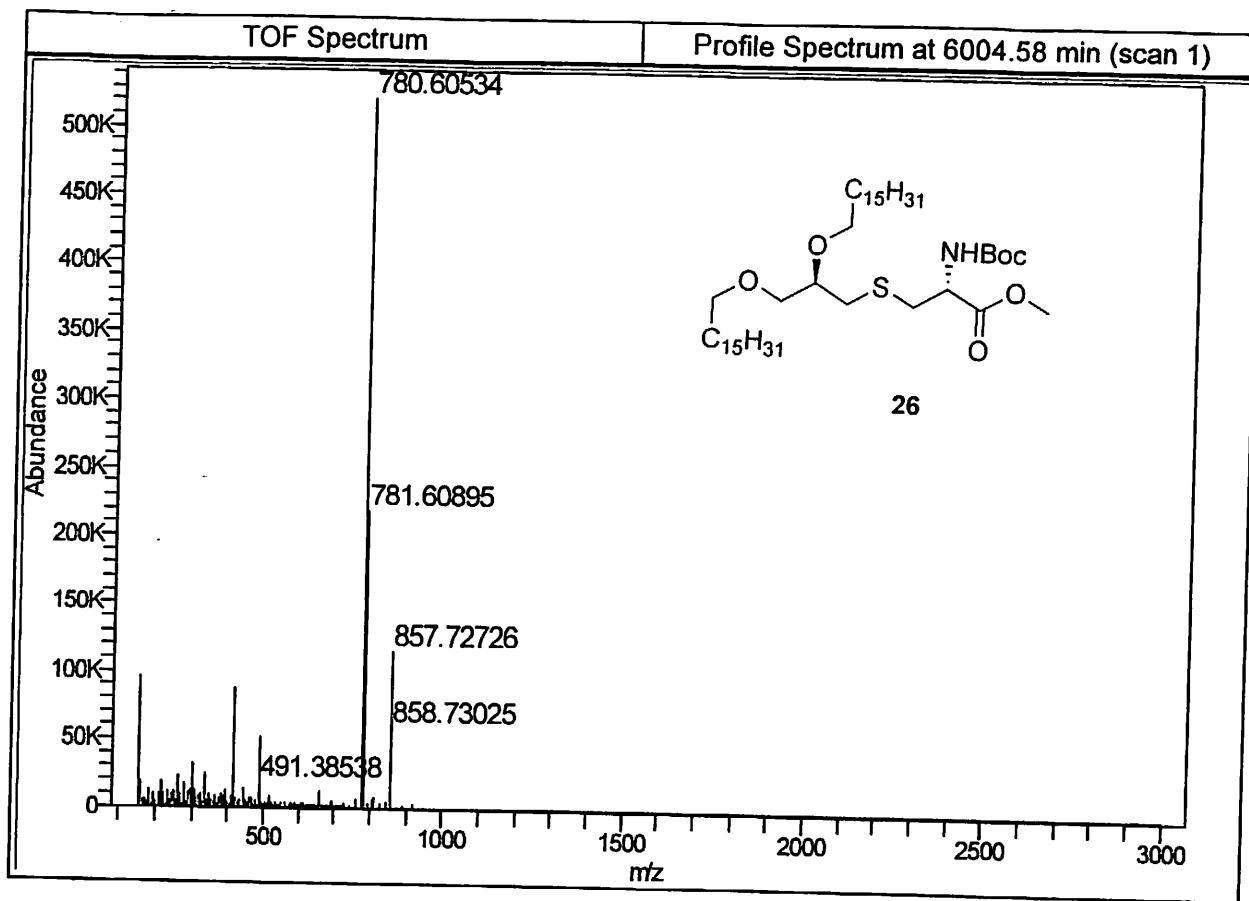

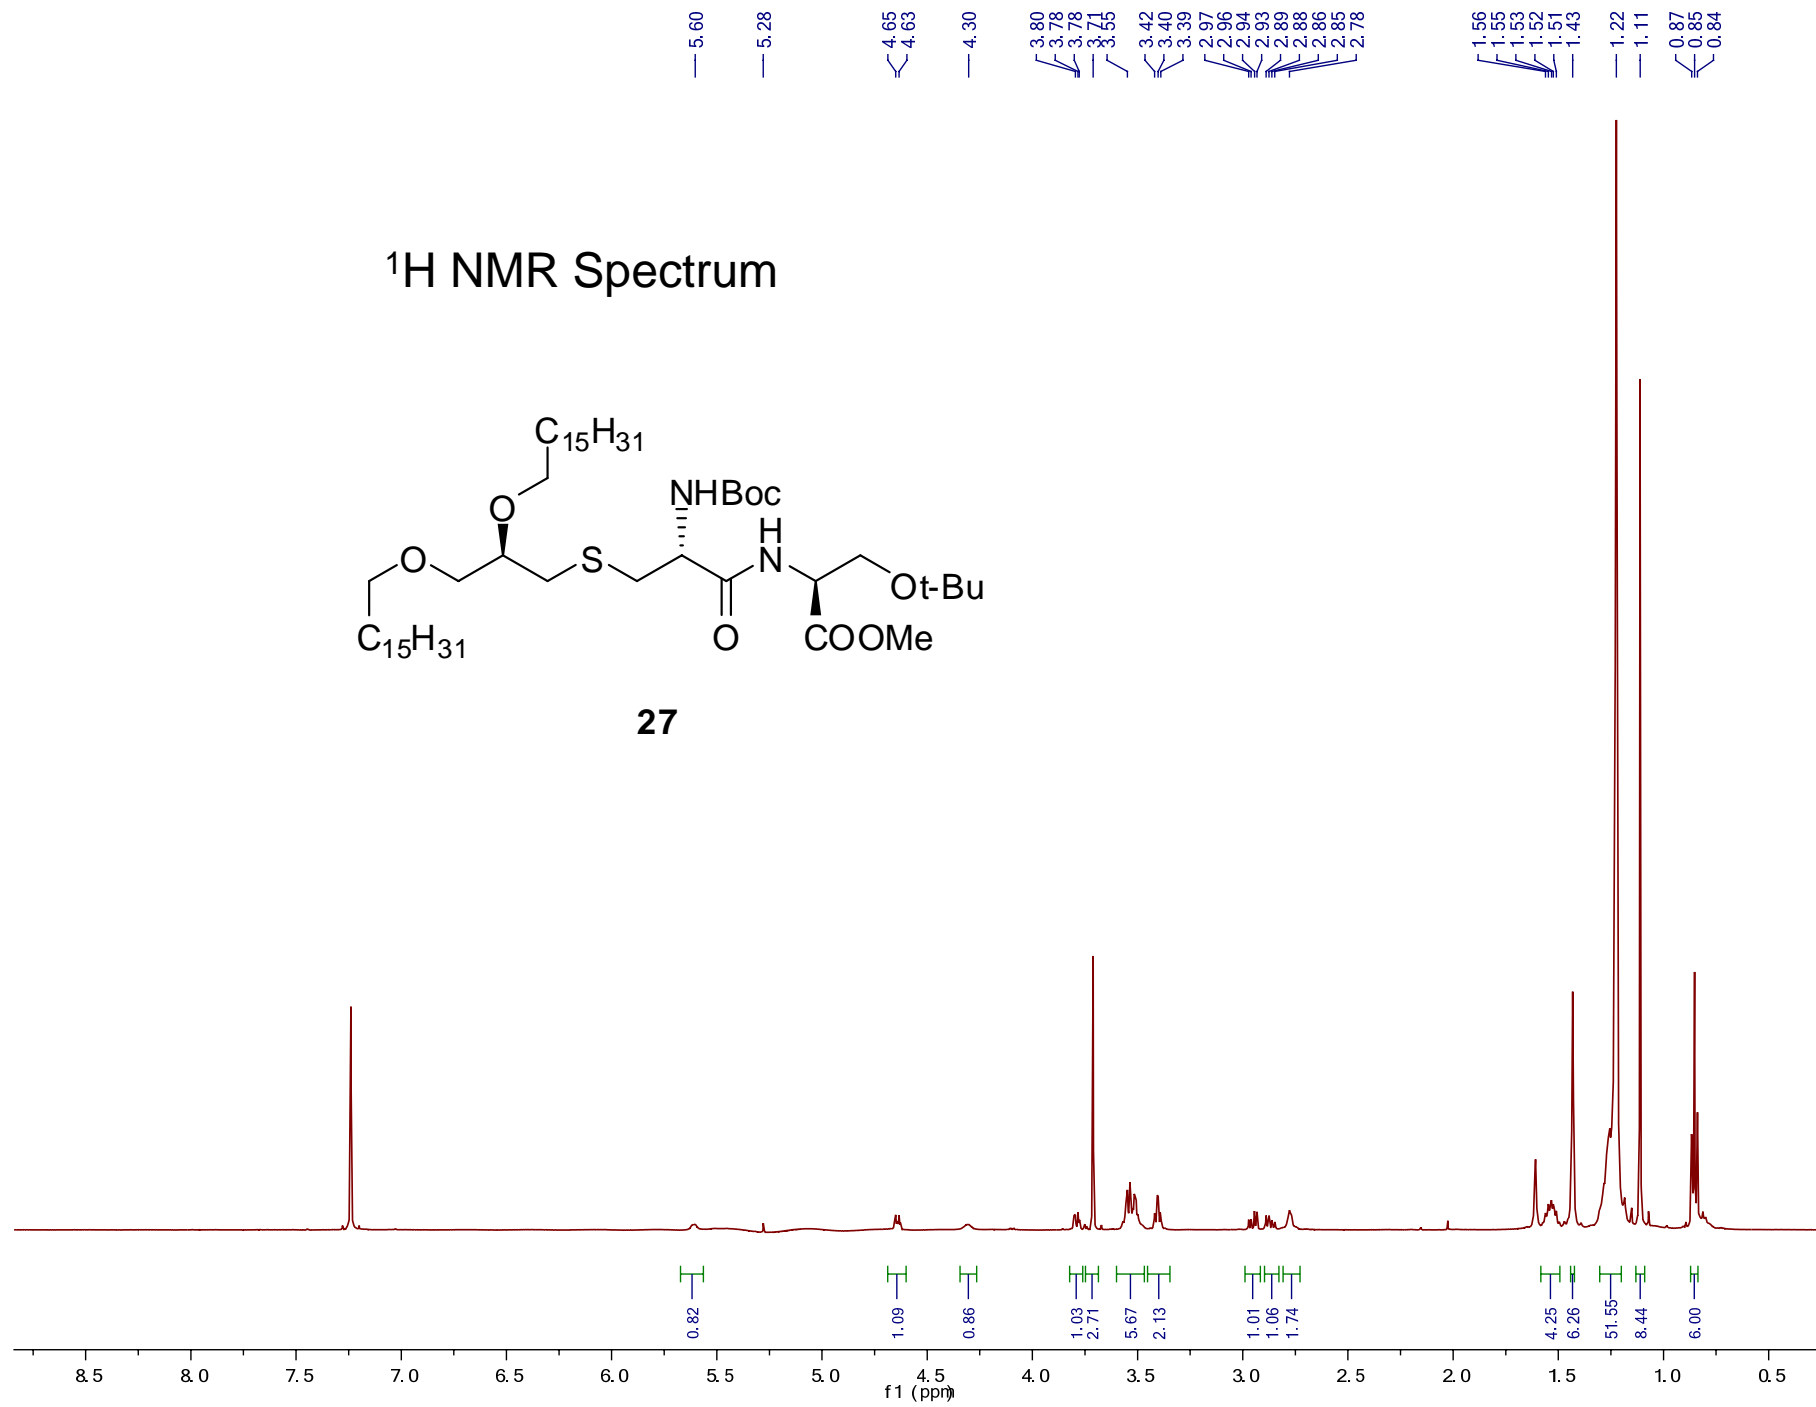

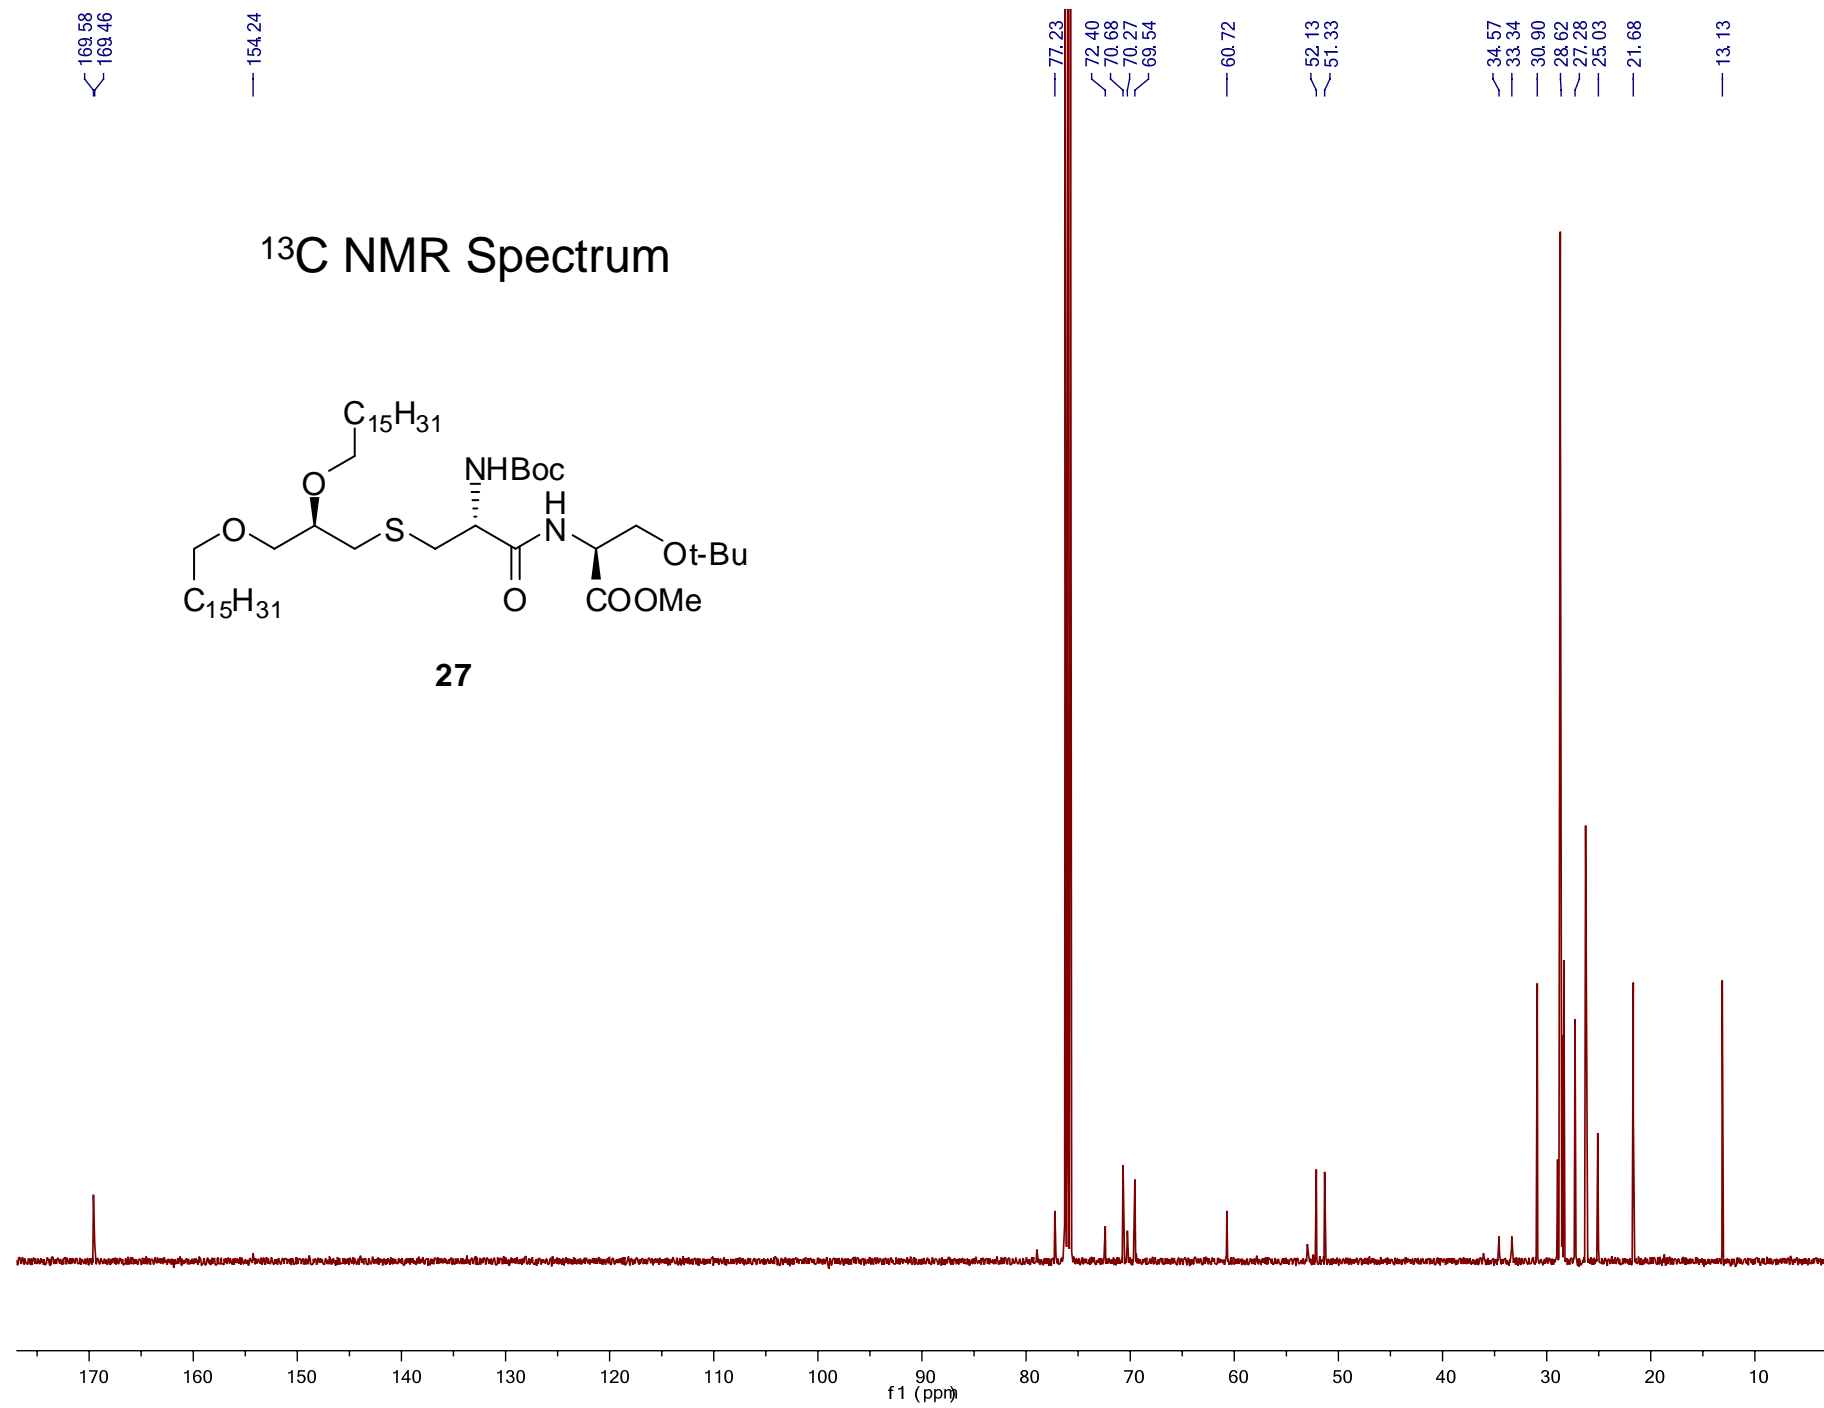

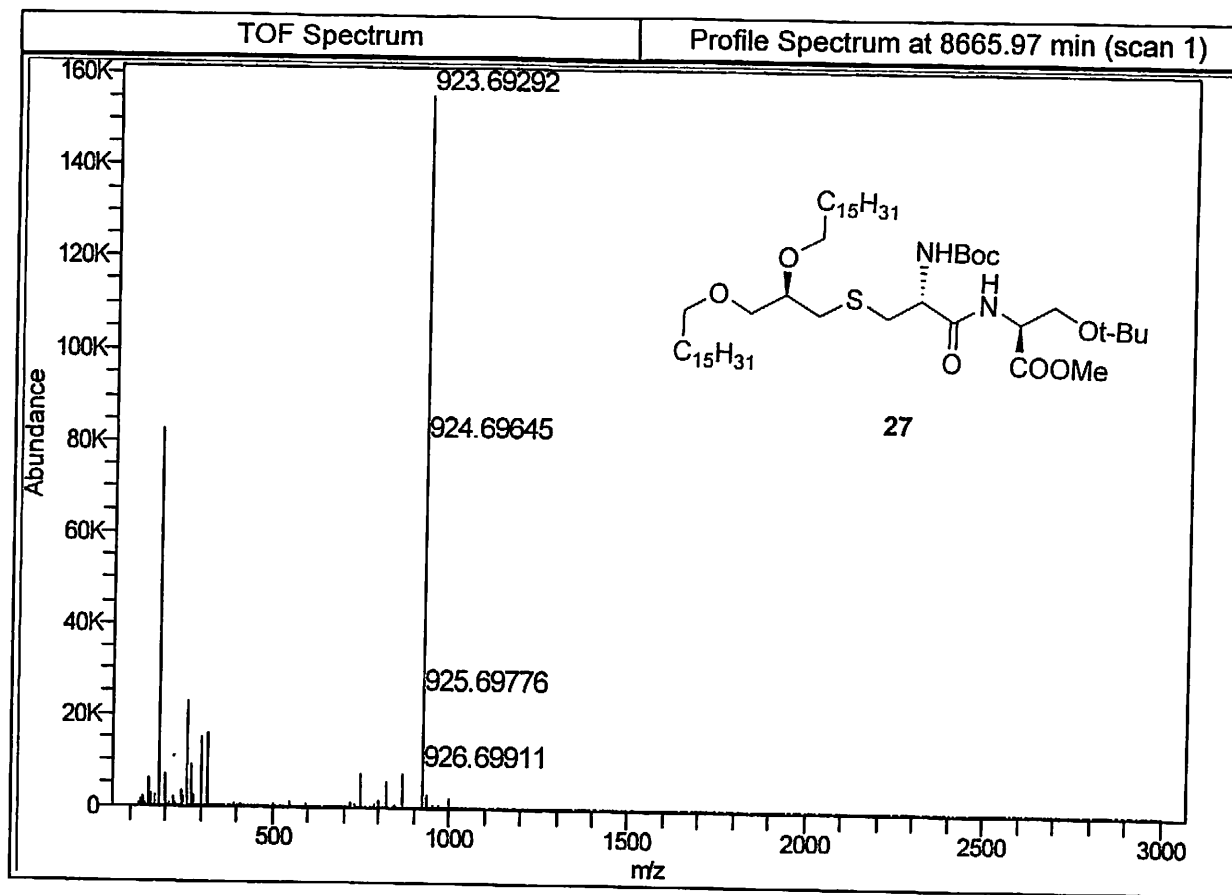

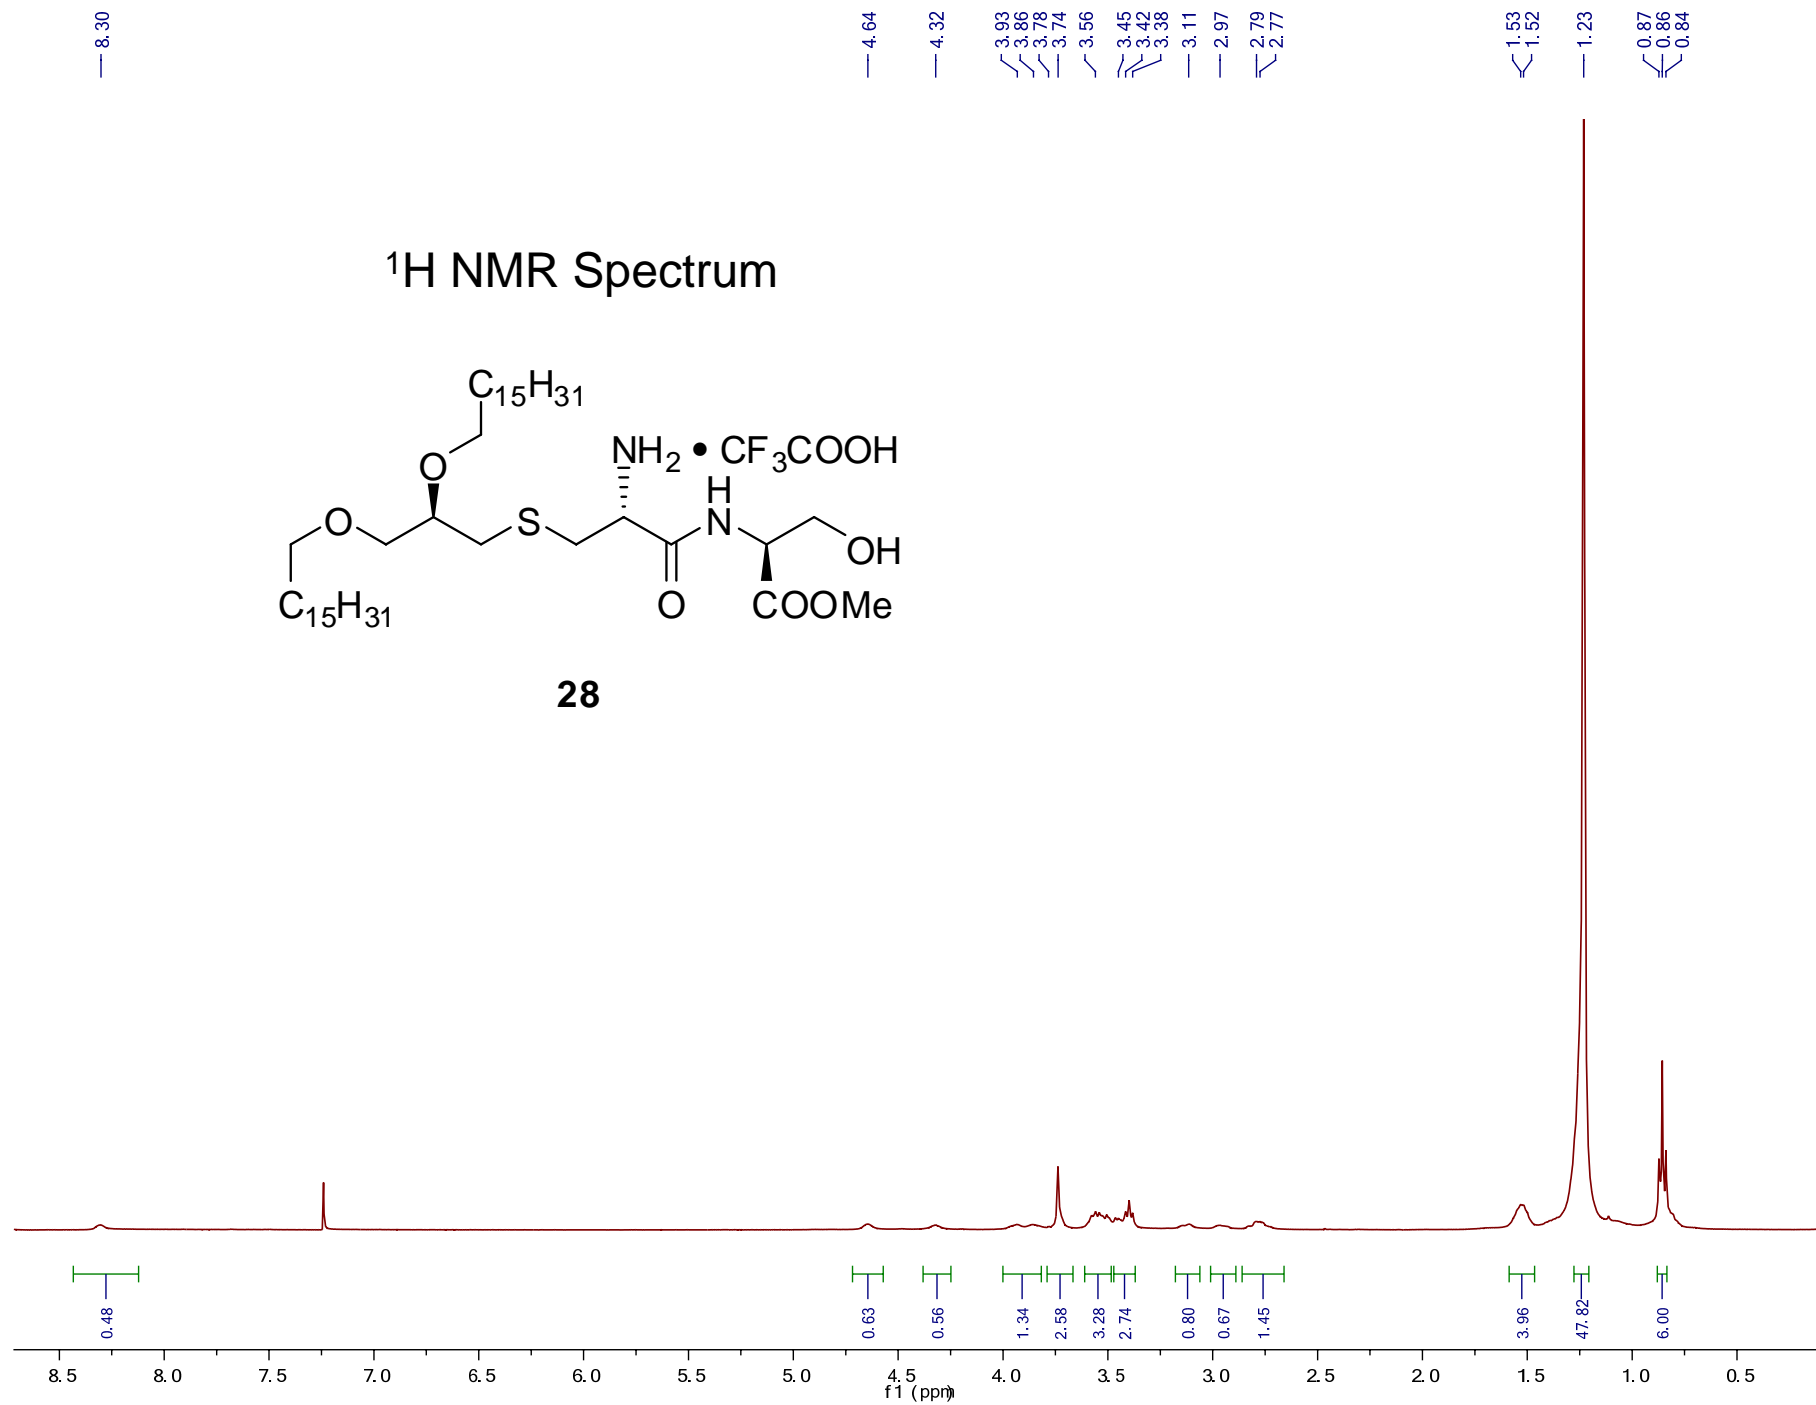

— 170.05

— 77.85

71.80  
71.12  
70.91

— 61.75

55.32  
53.06  
52.7434.98  
34.32  
31.93

29.38

25.87  
22.69

— 14.12

### $^{13}\text{C}$ NMR Spectrum

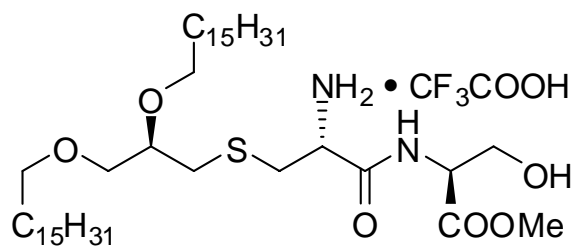**28**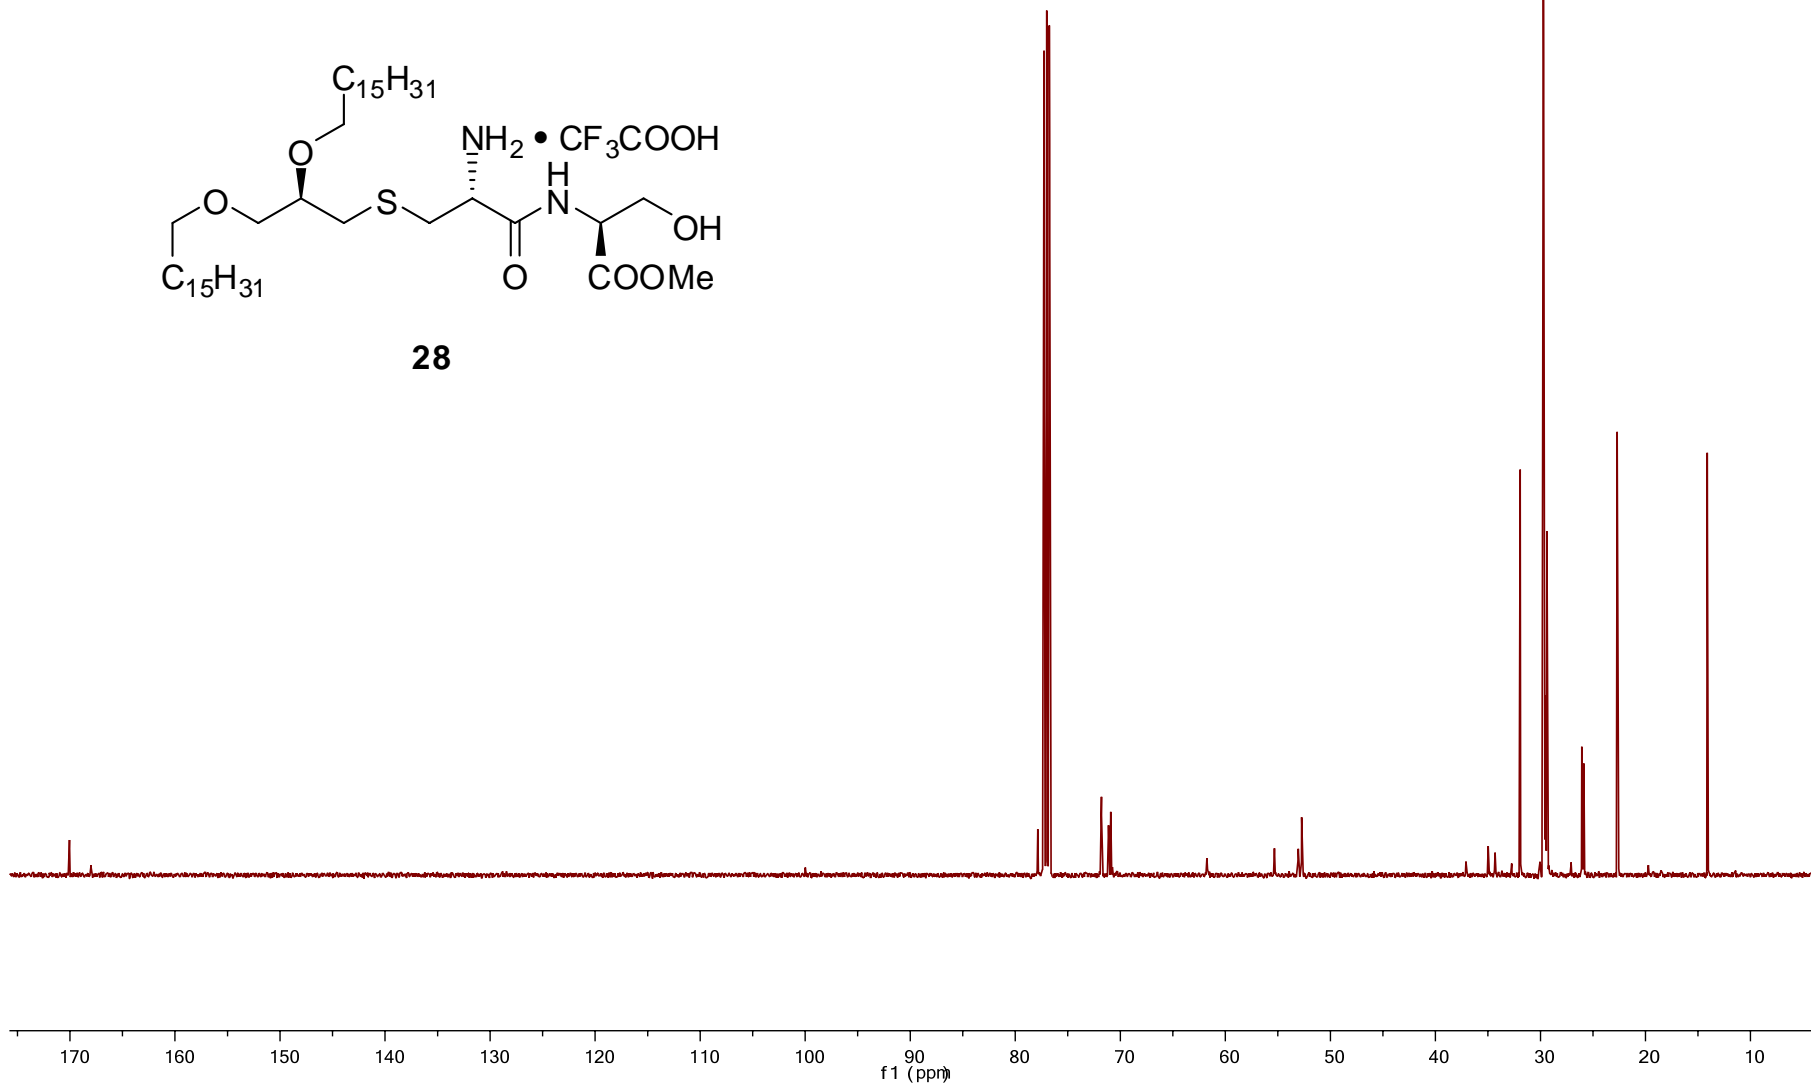

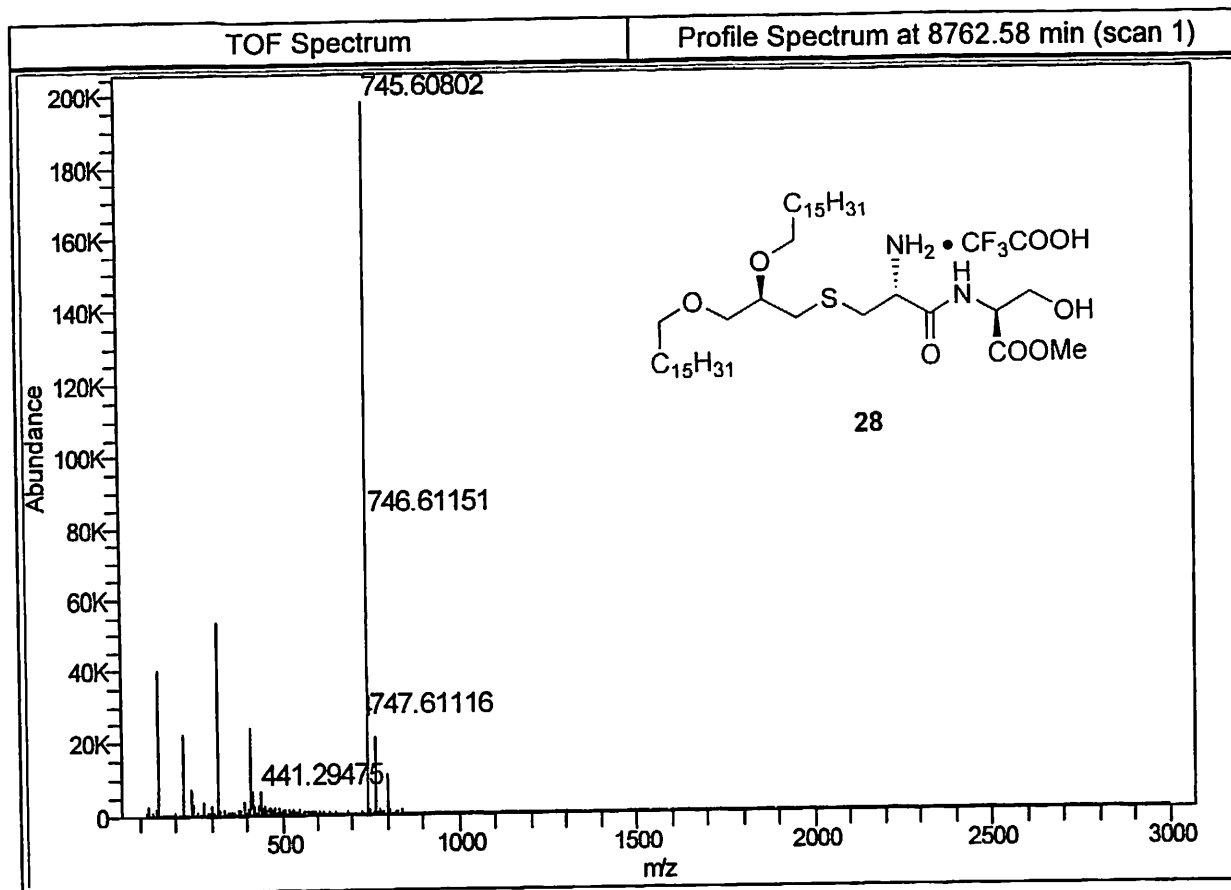



$^1\text{H}$  NMR Spectrum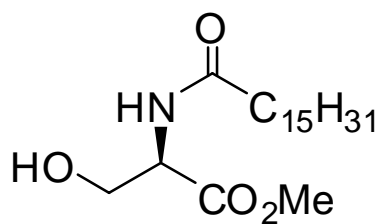**30**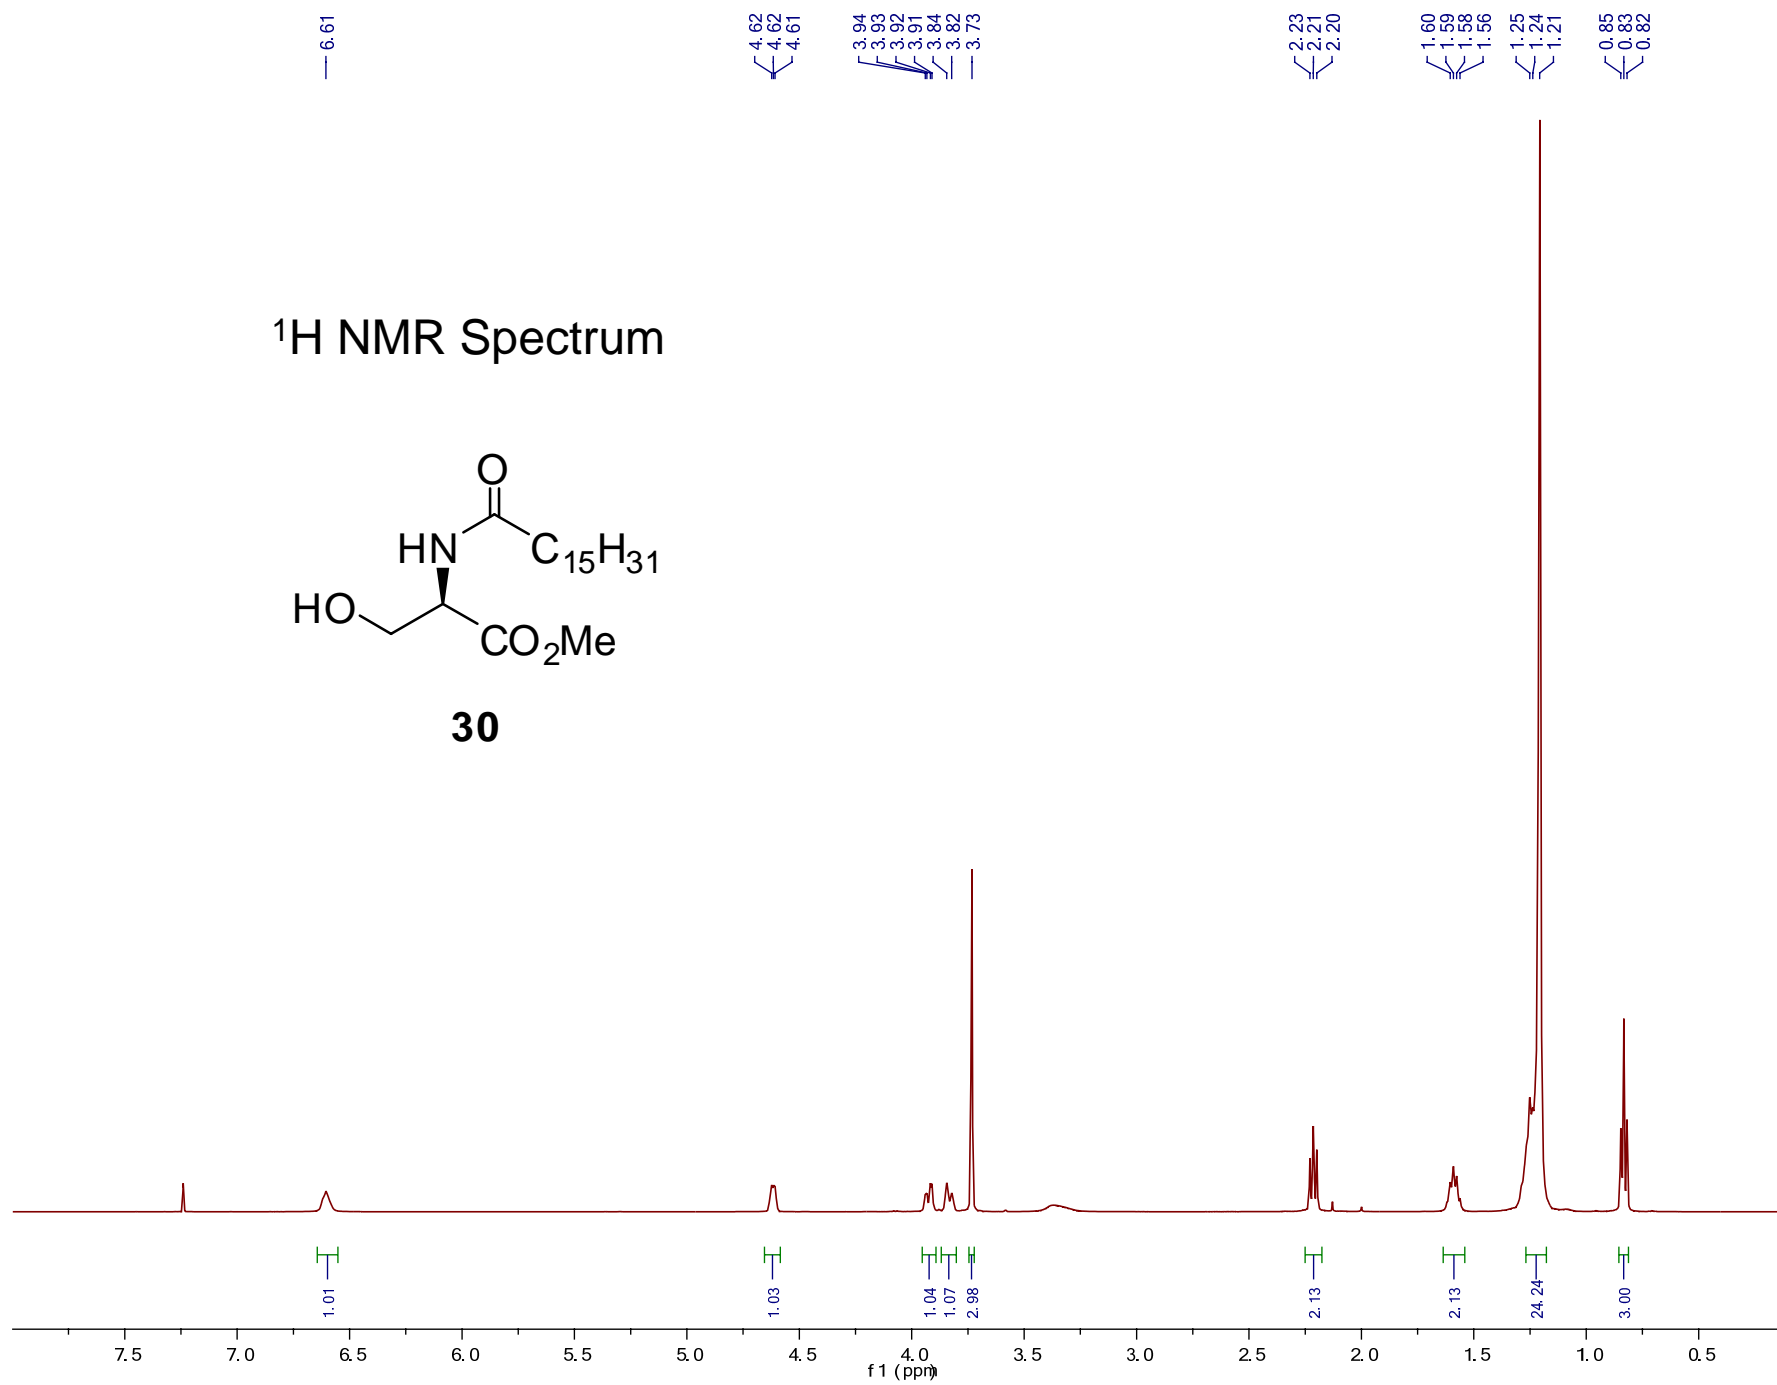

$^{13}\text{C}$  NMR Spectrum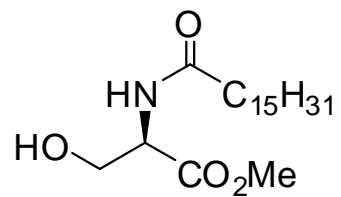**30**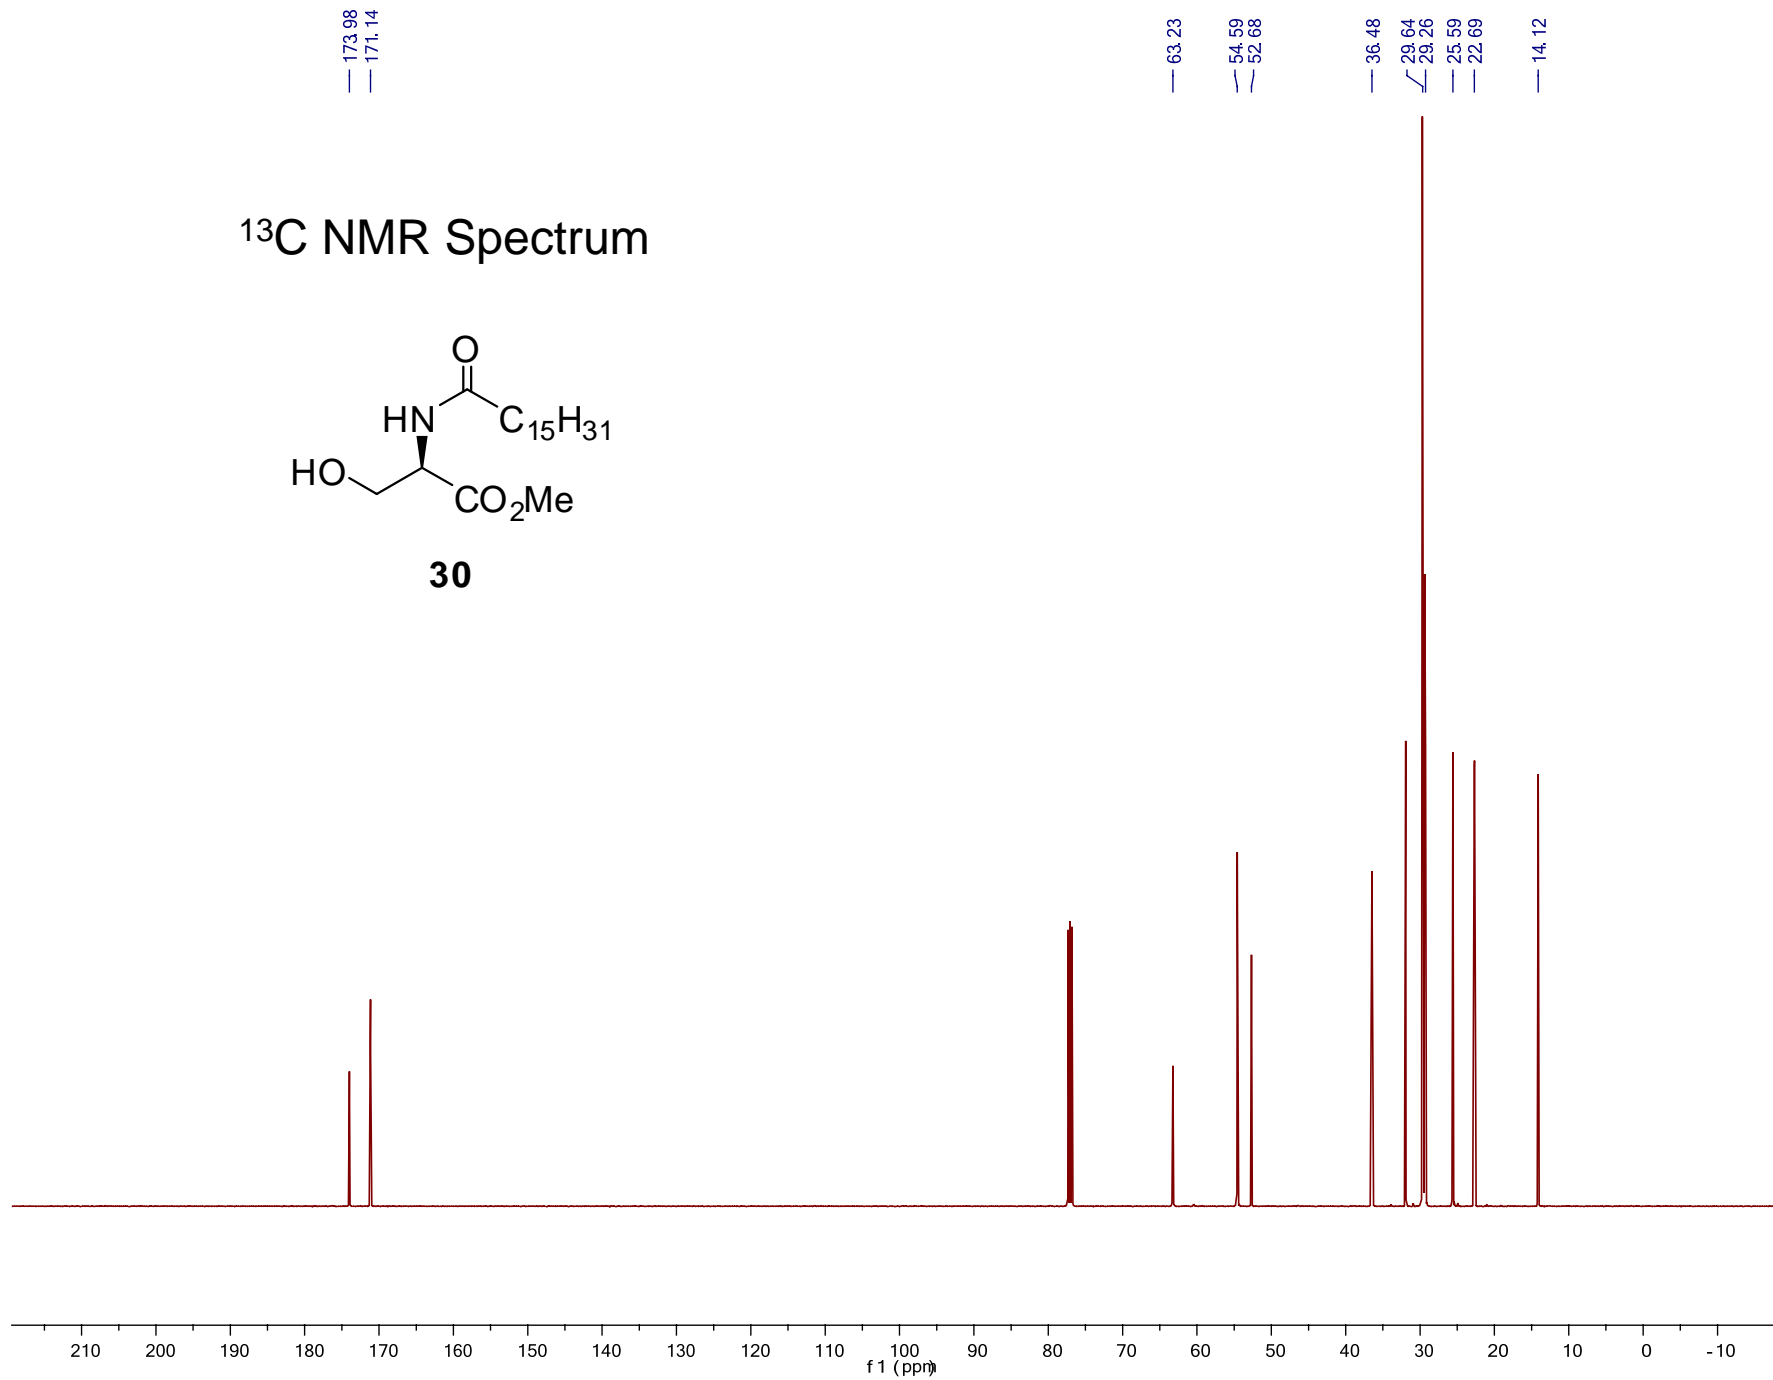

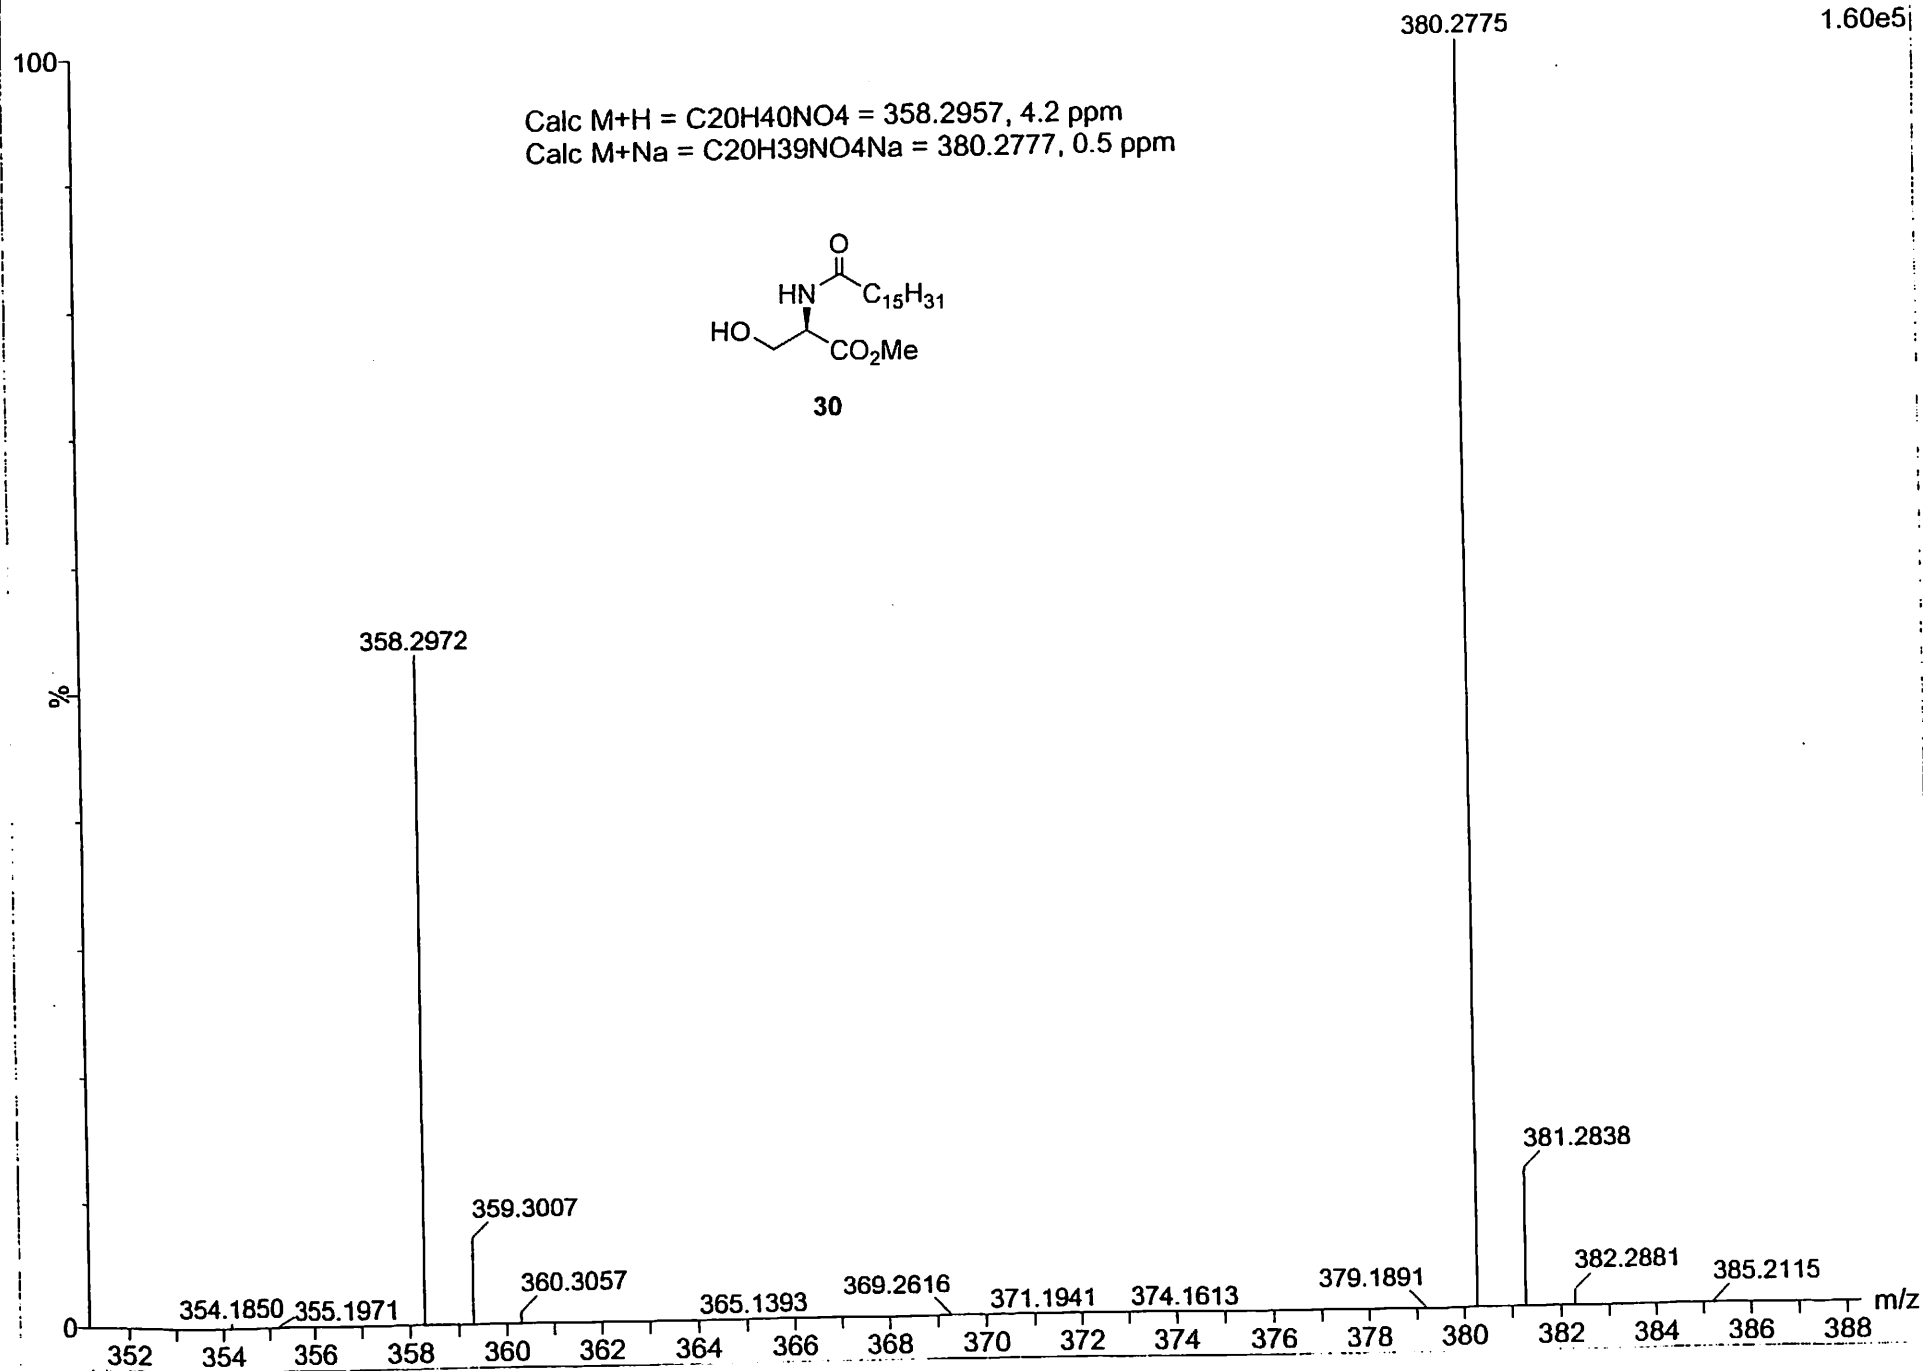

$^1\text{H}$  NMR Spectrum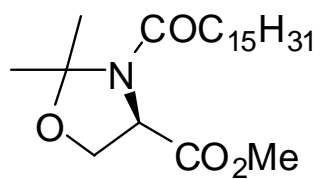**31**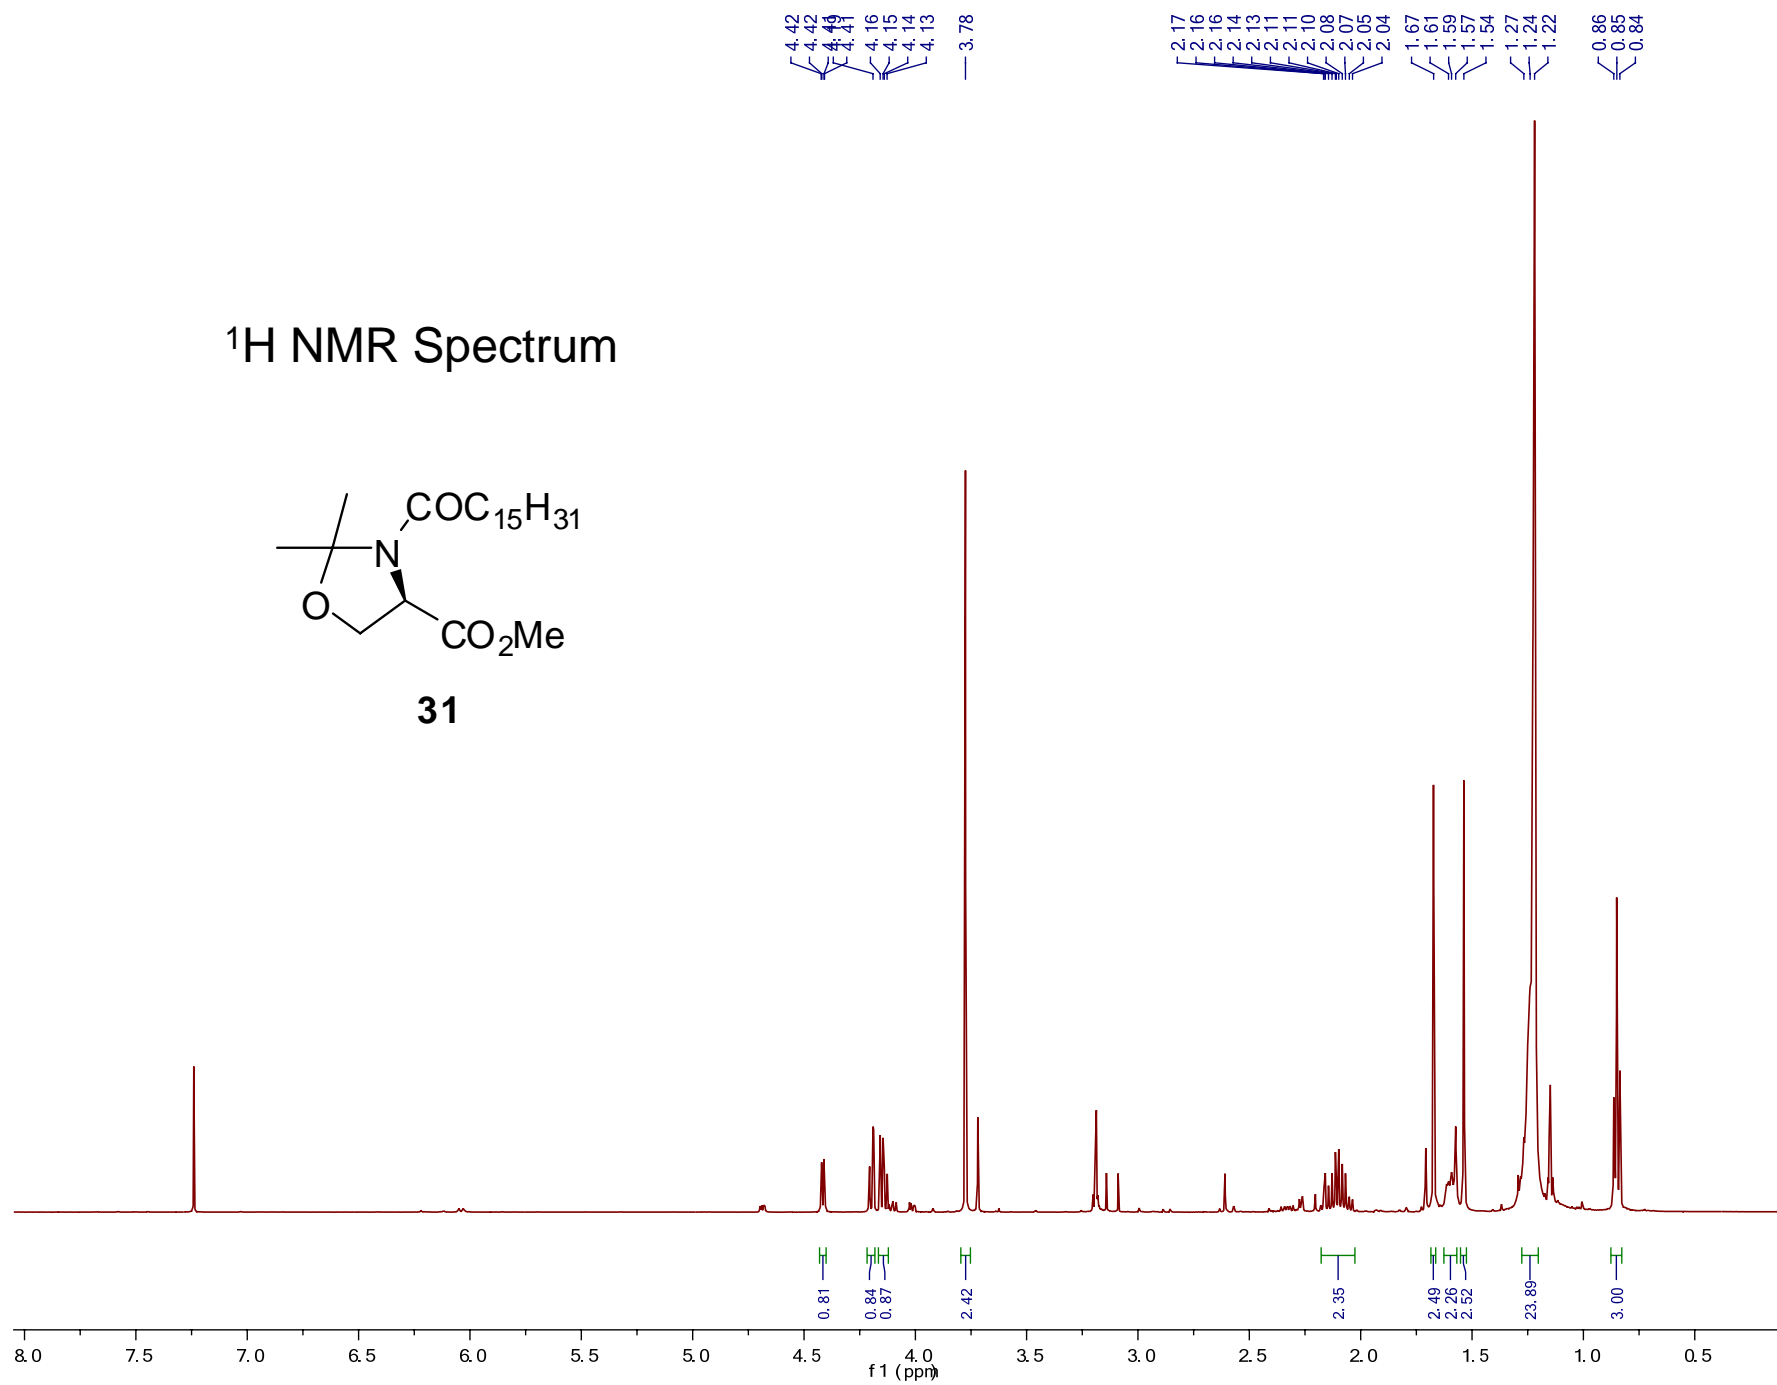

171.15  
170.17

96.62

66.99

59.49

52.89

35.64

31.93

29.37

25.15

24.57

23.70

14.13

 $^{13}\text{C}$  NMR Spectrum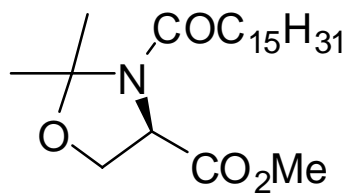**31**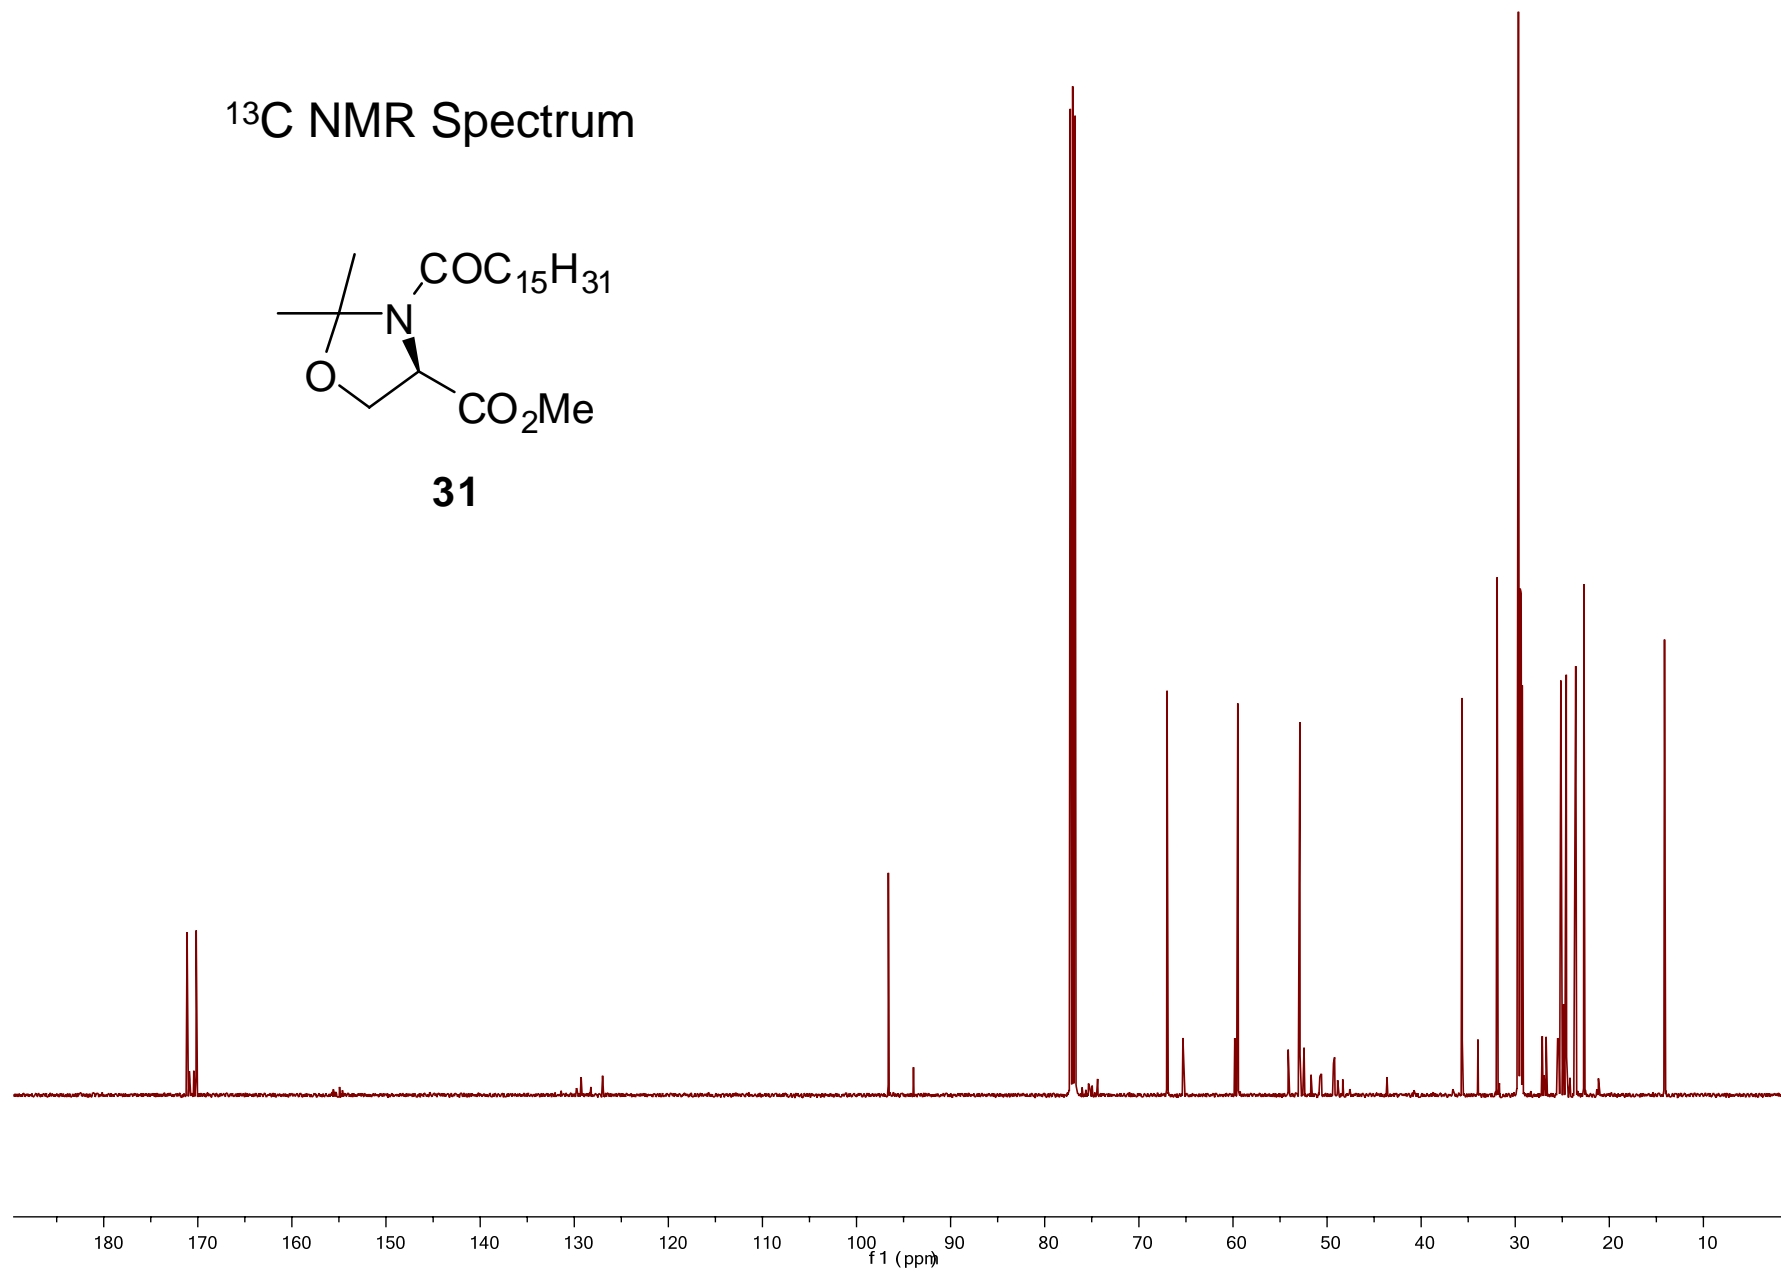

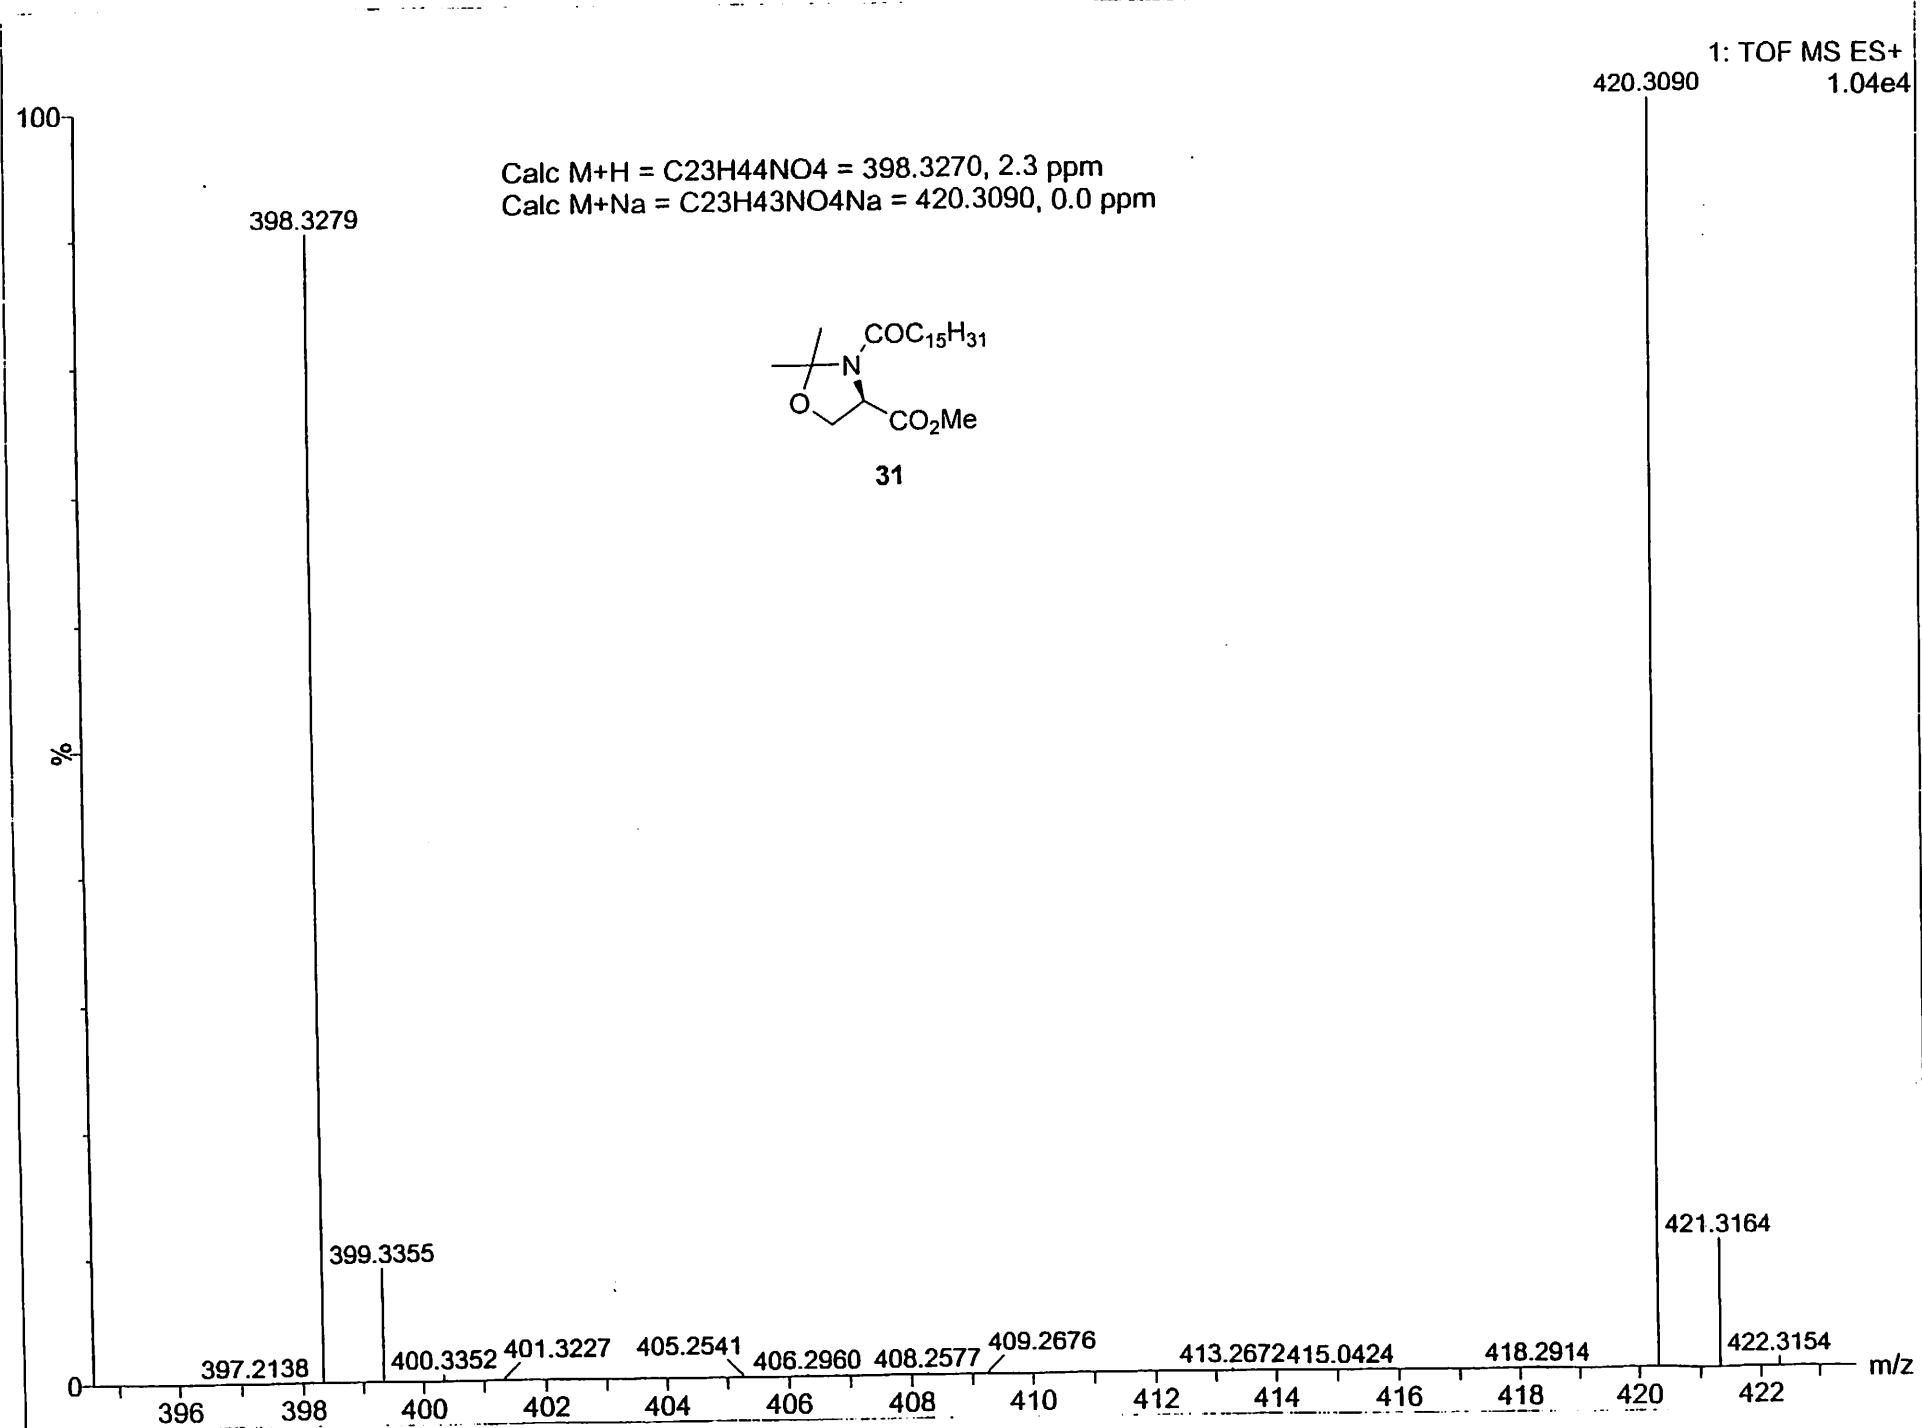

$^1\text{H}$  NMR Spectrum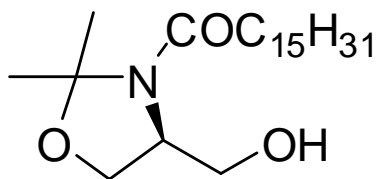**32**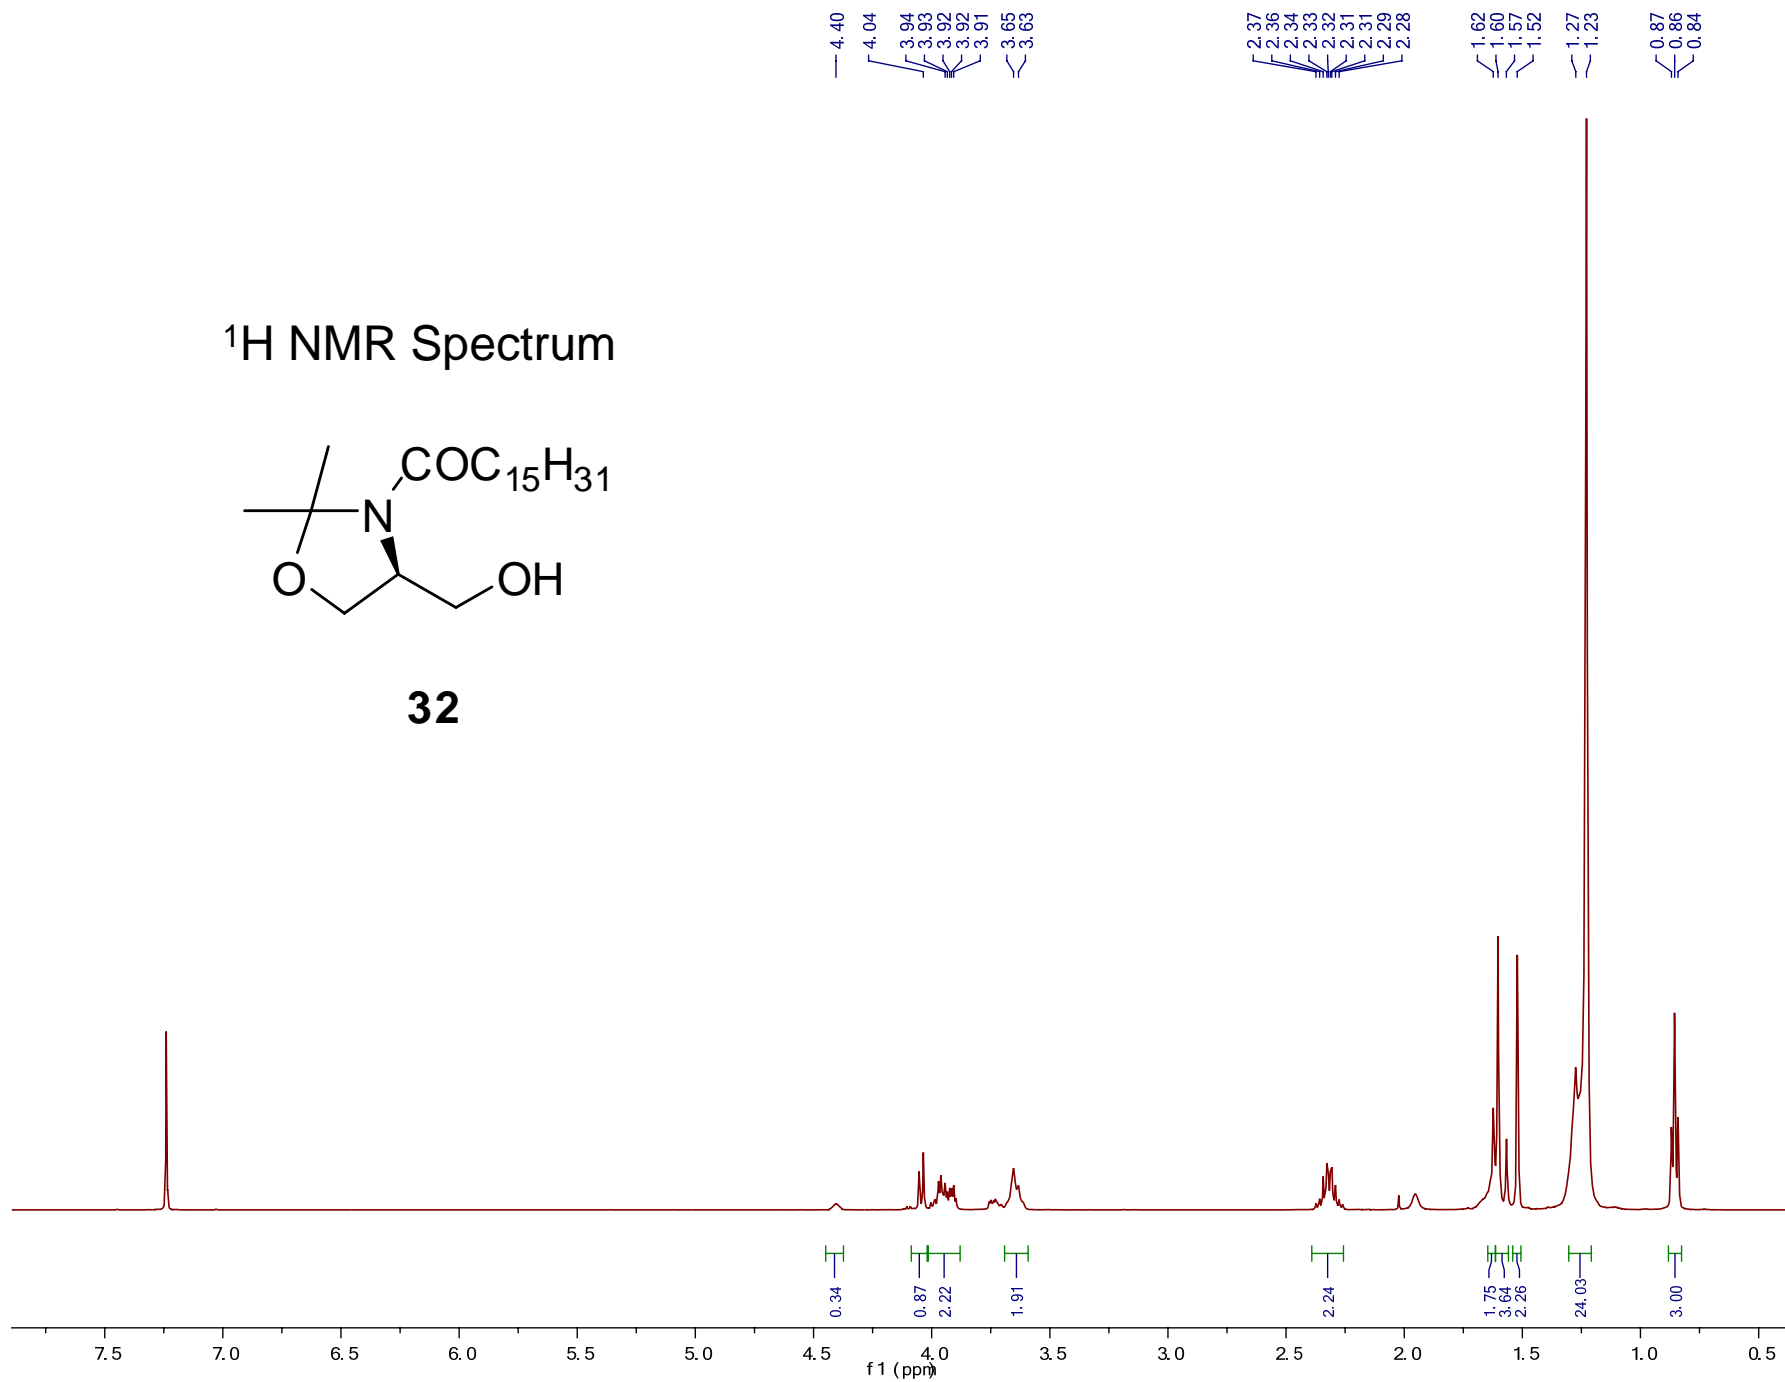

— 170.41

— 95.27

— 65.43

— 62.93

— 58.55

— 35.49

— 31.94

— 29.38

— 25.20

— 22.93

— 22.71

— 14.15

# $^{13}\text{C}$ NMR Spectrum

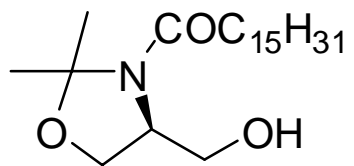**32**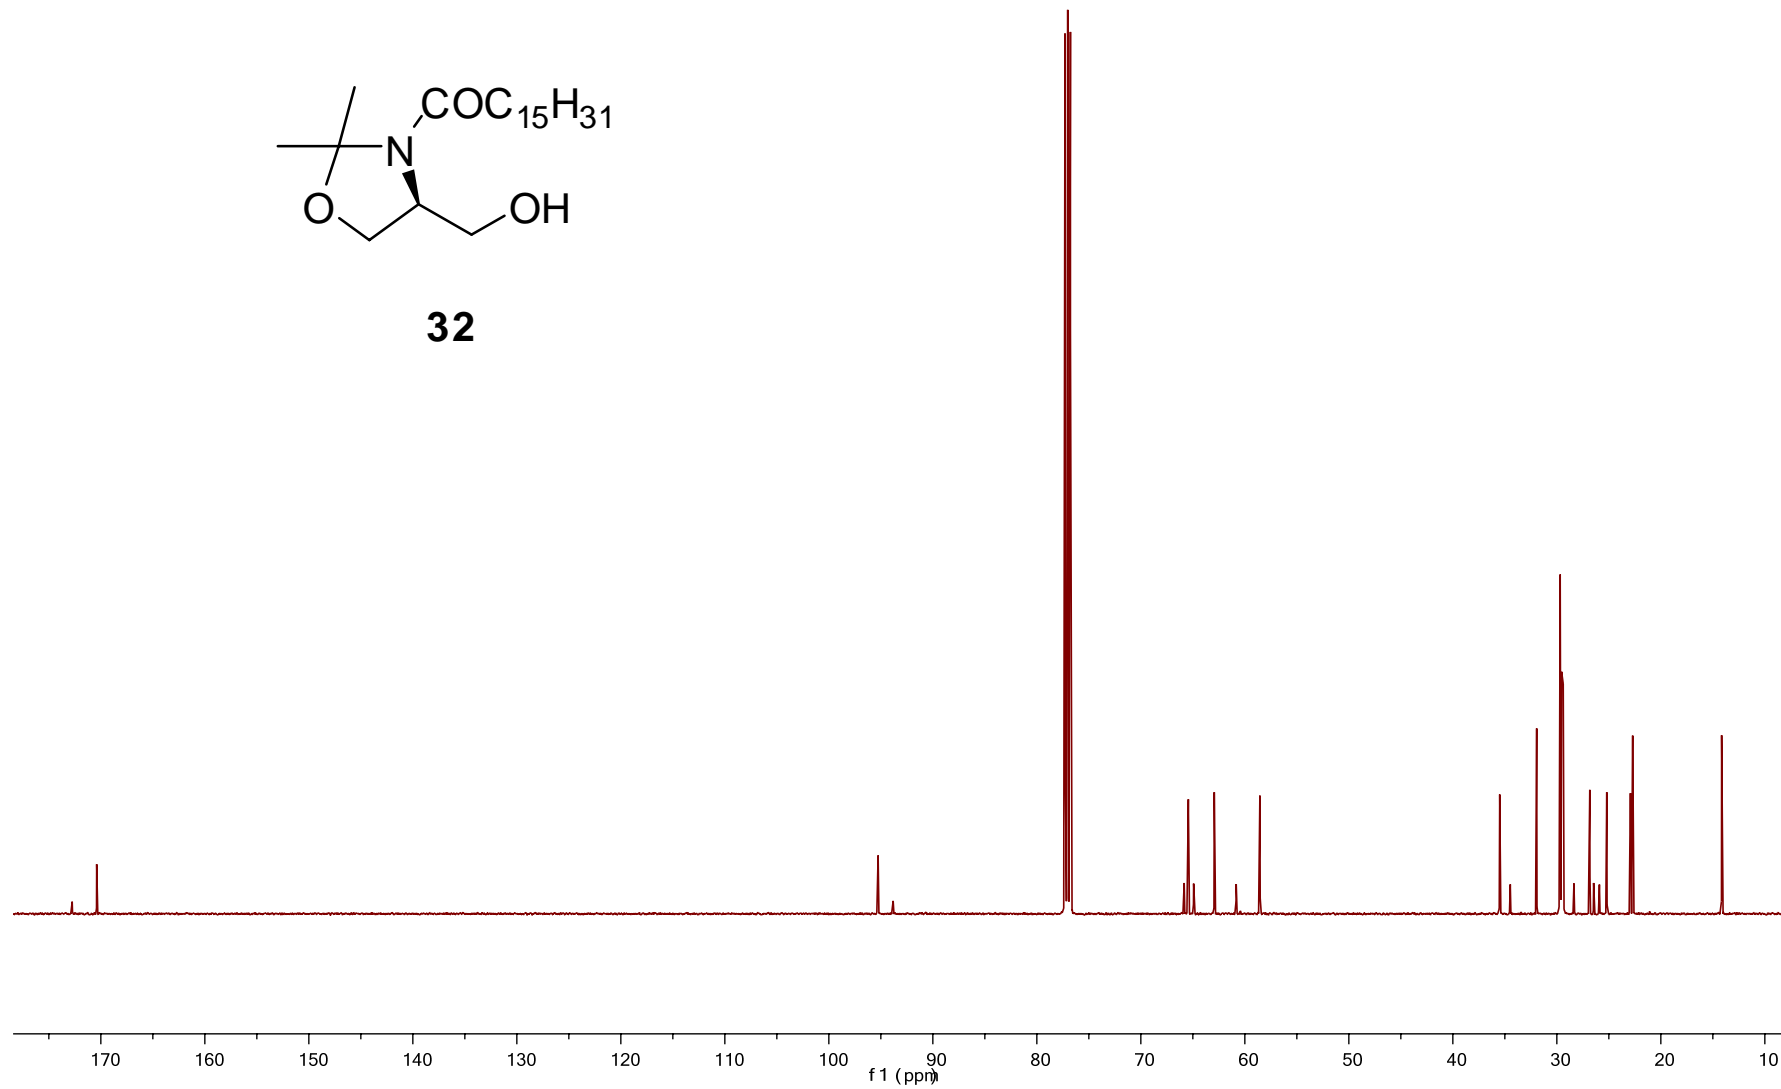



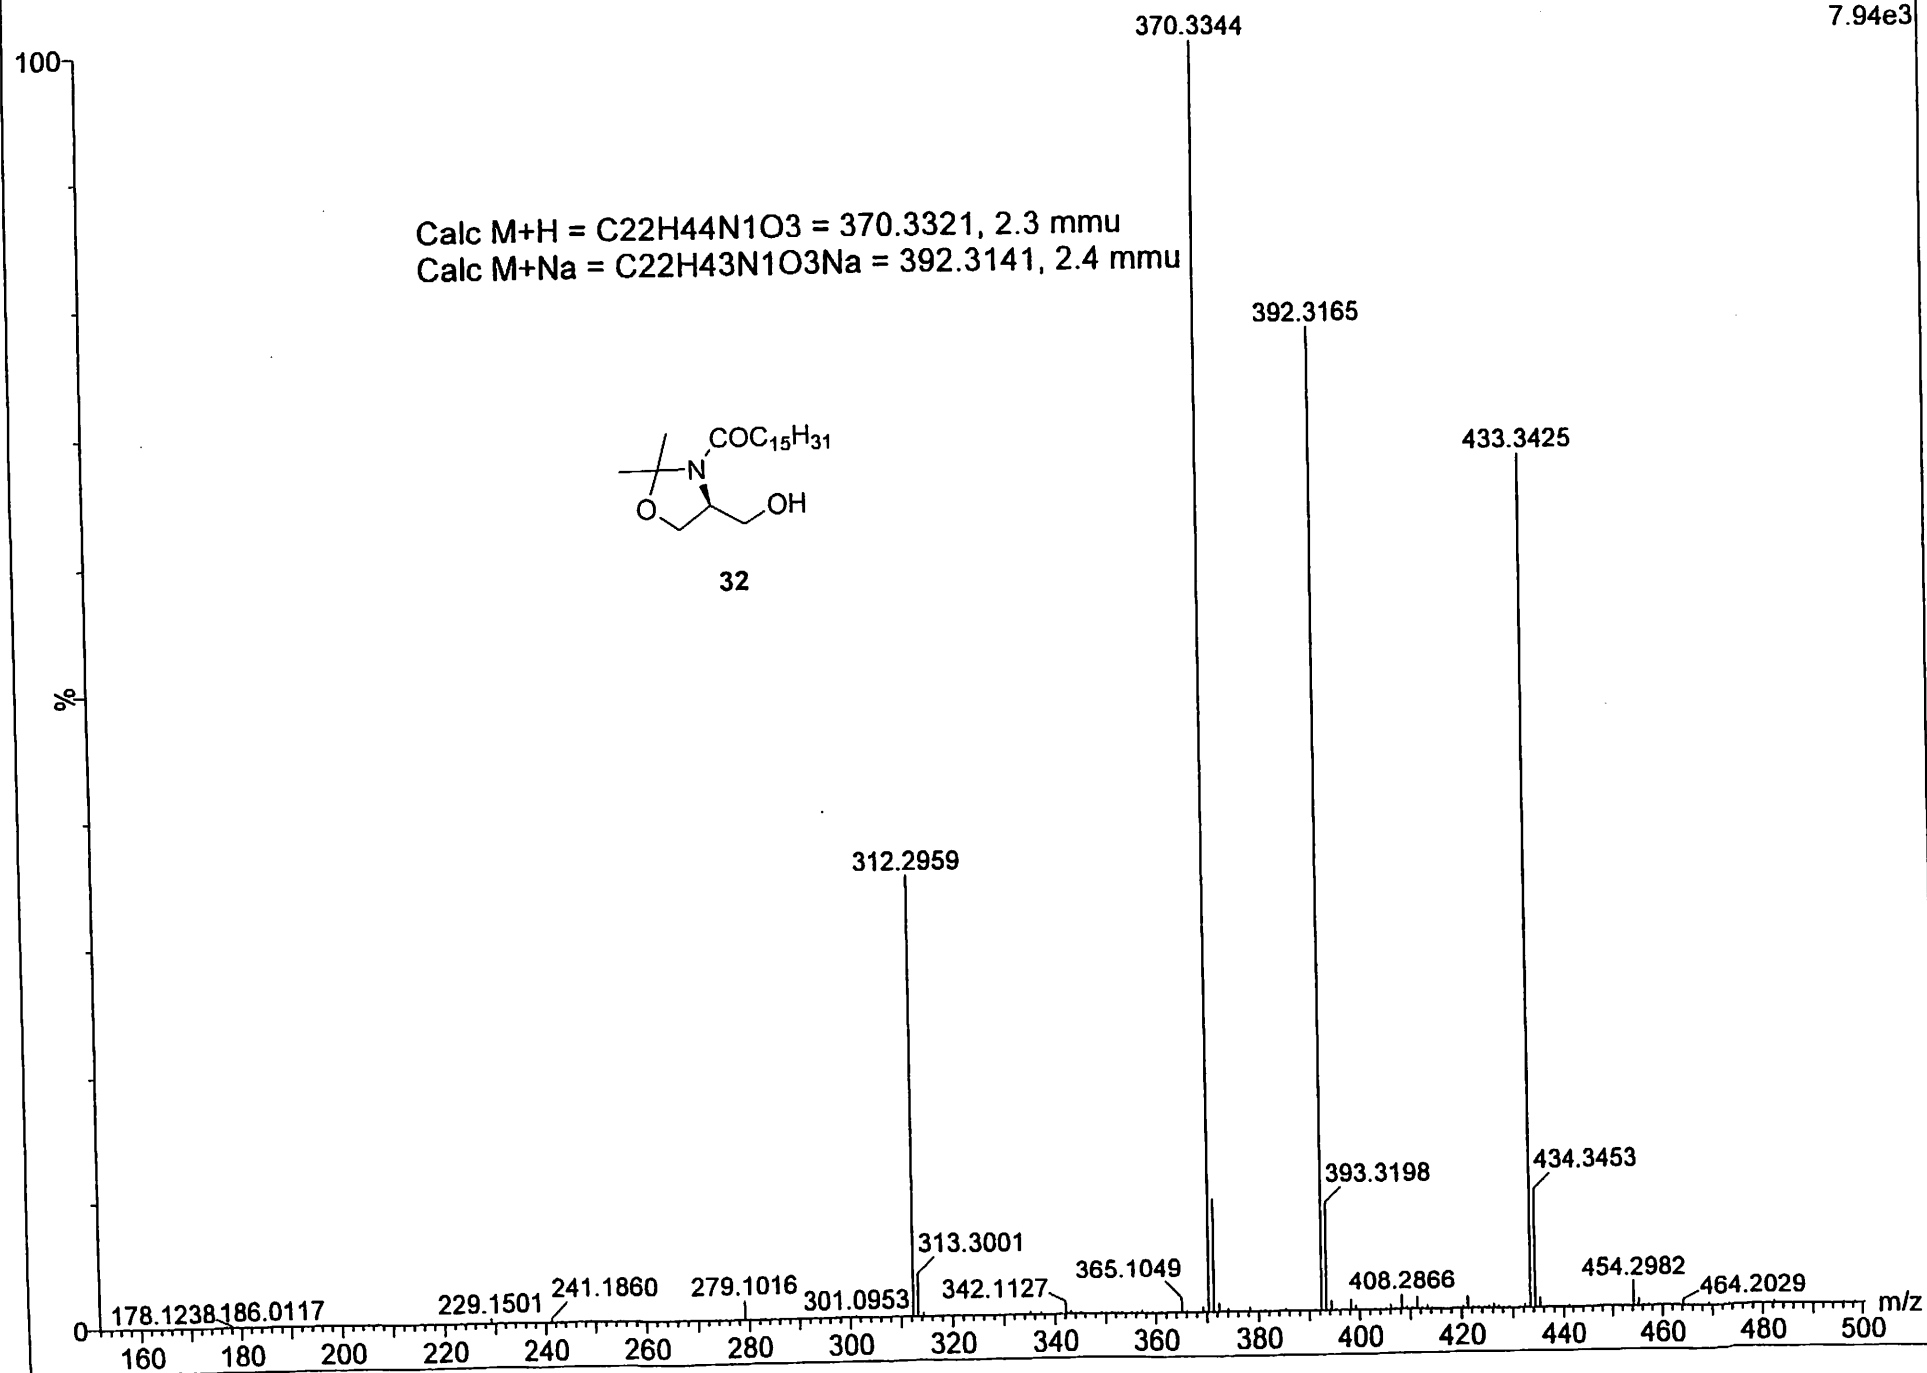

$^1\text{H}$  NMR Spectrum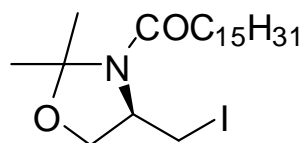**33**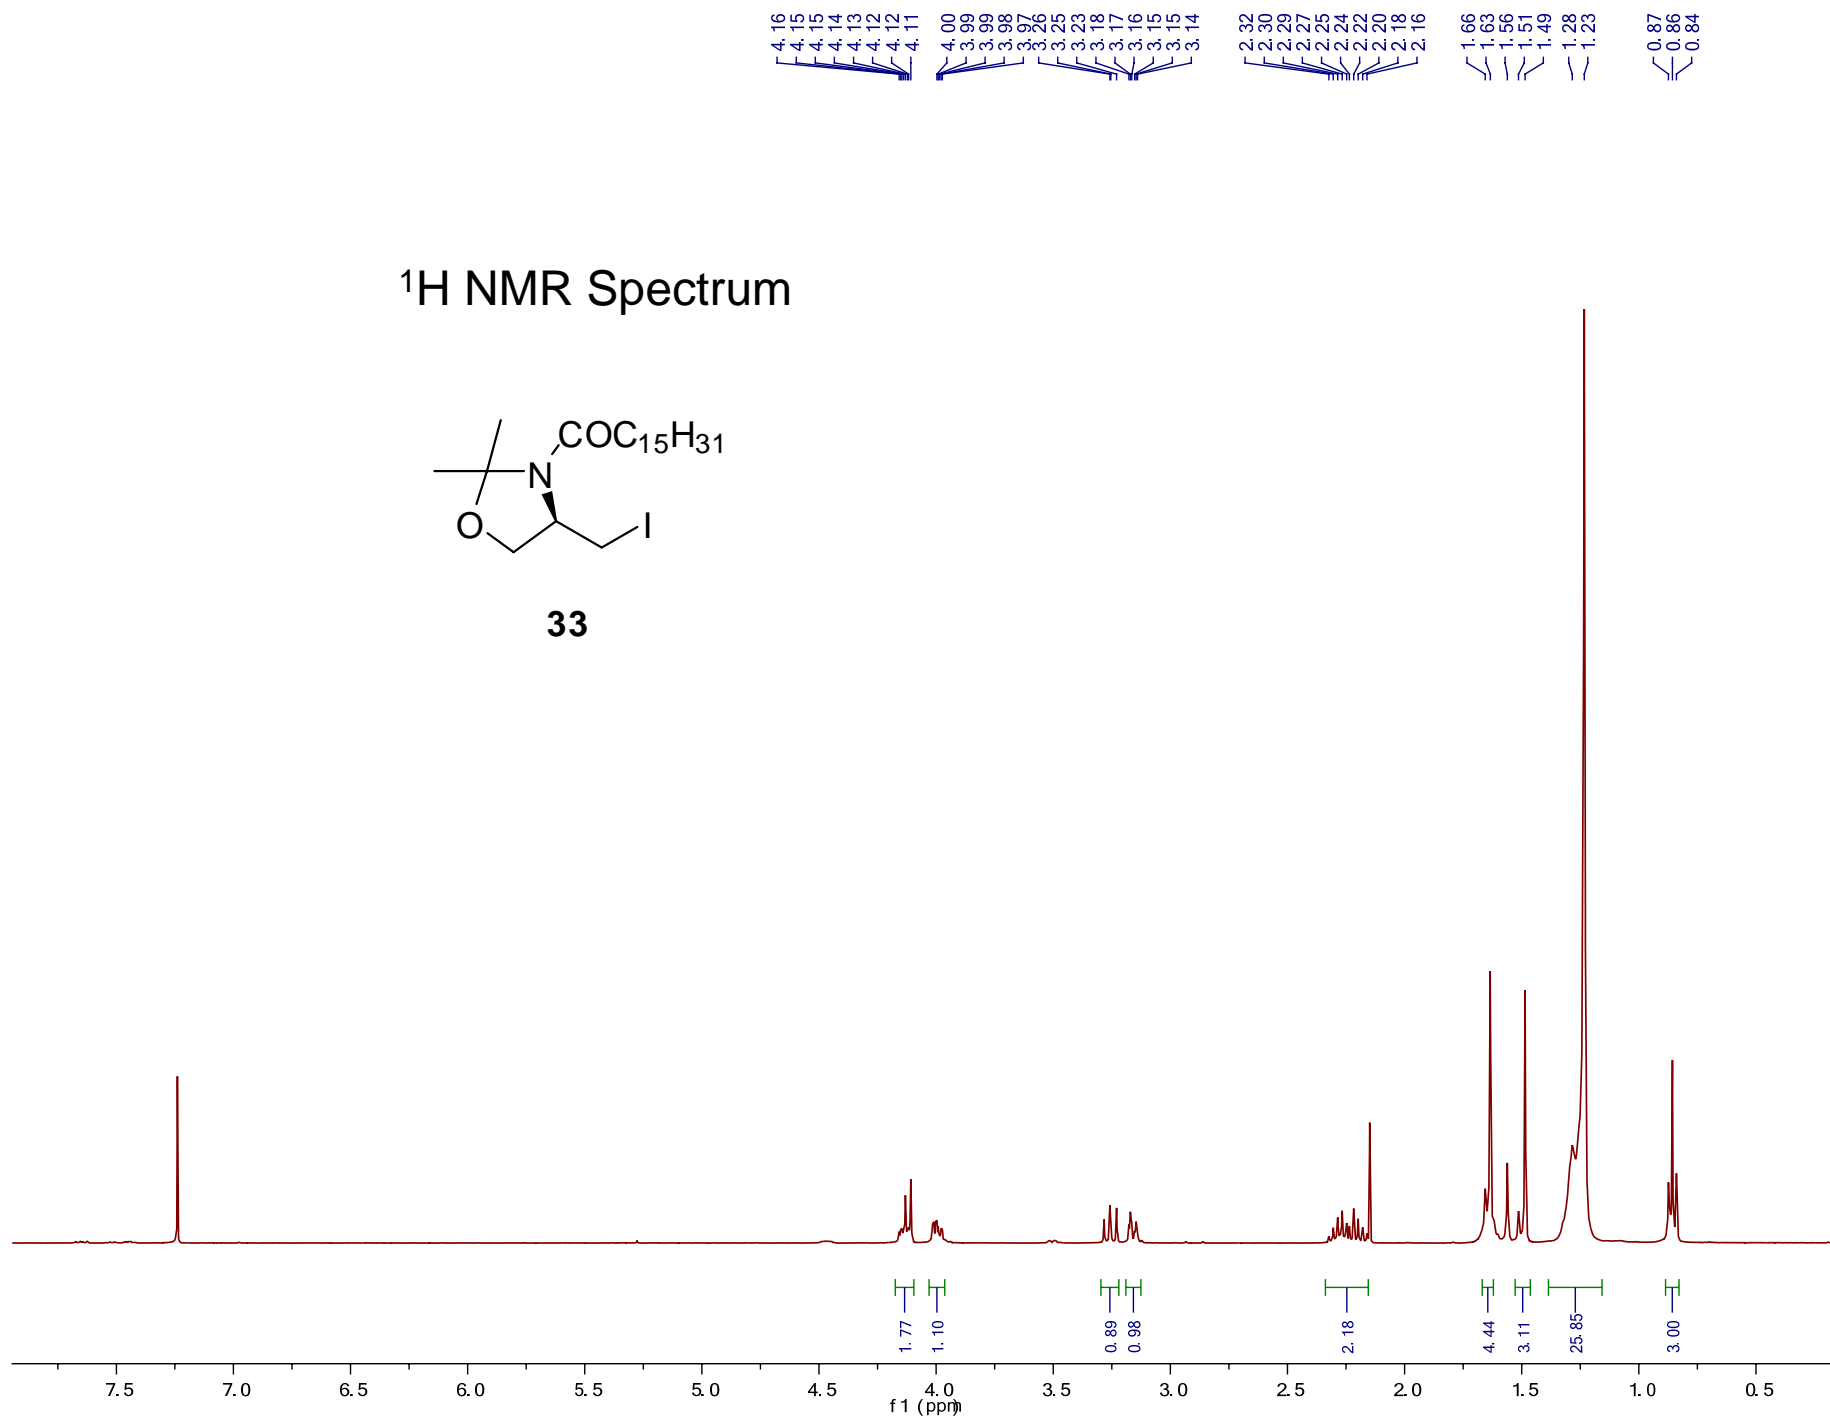

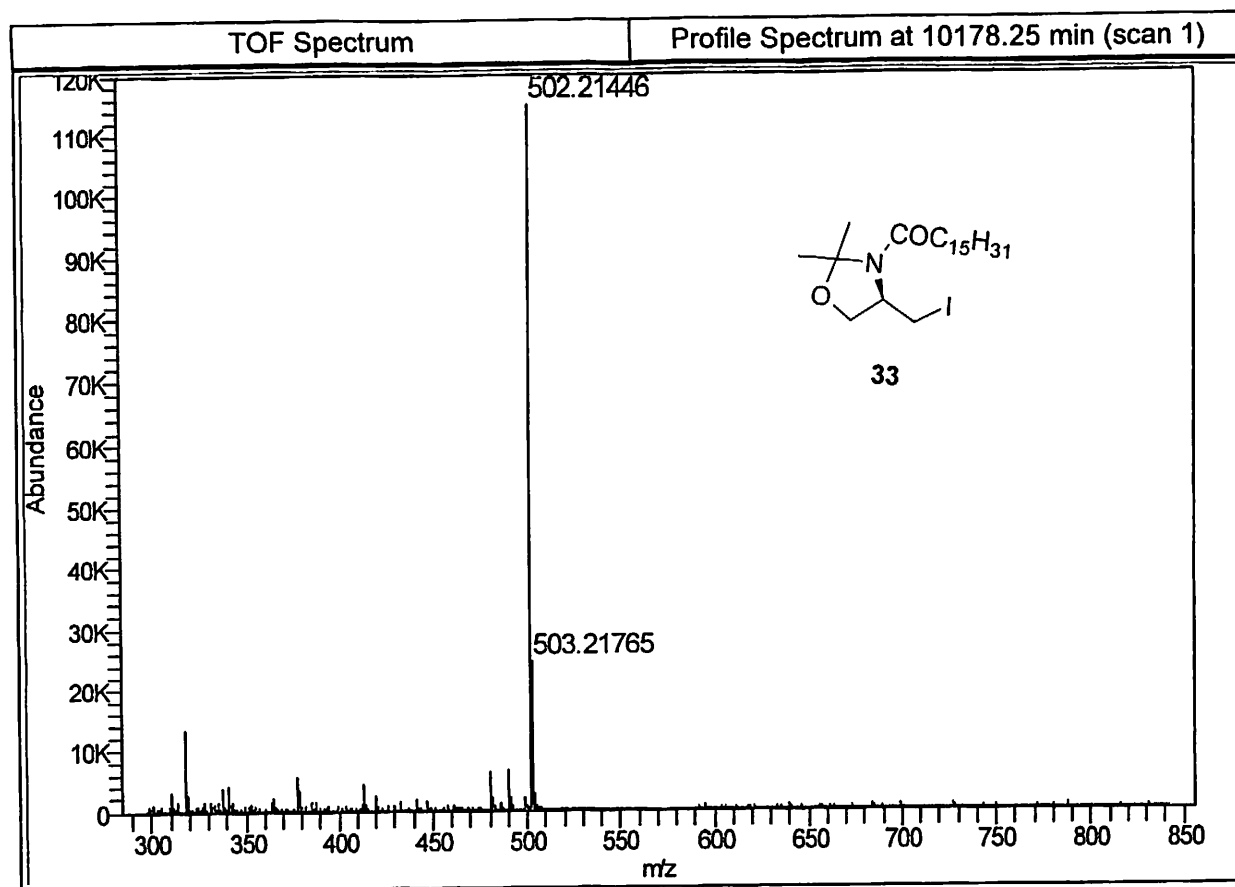

# <sup>1</sup>H NMR Spectrum

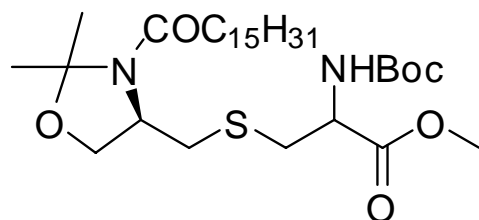

34

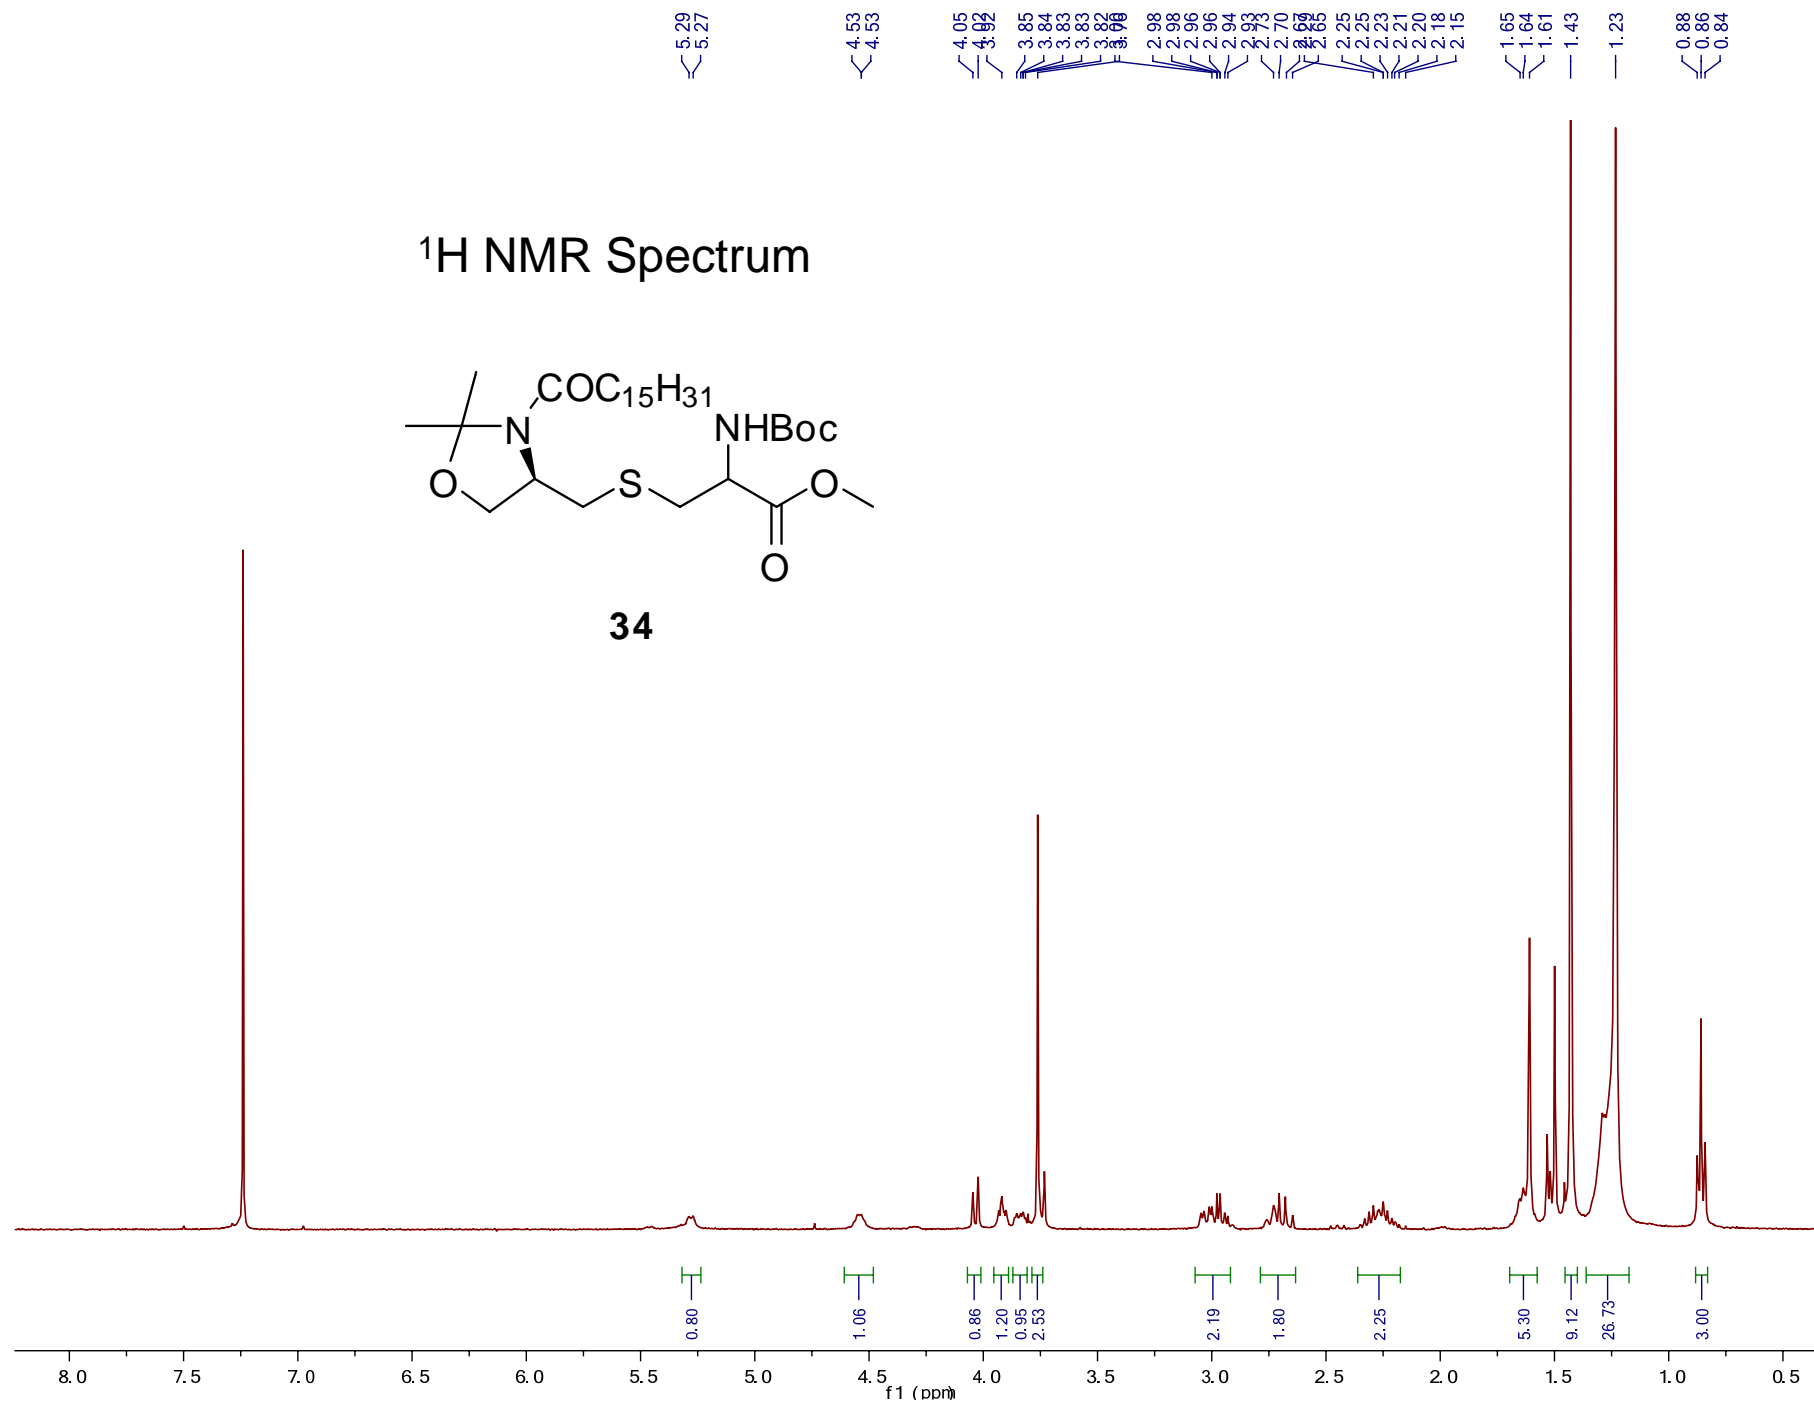

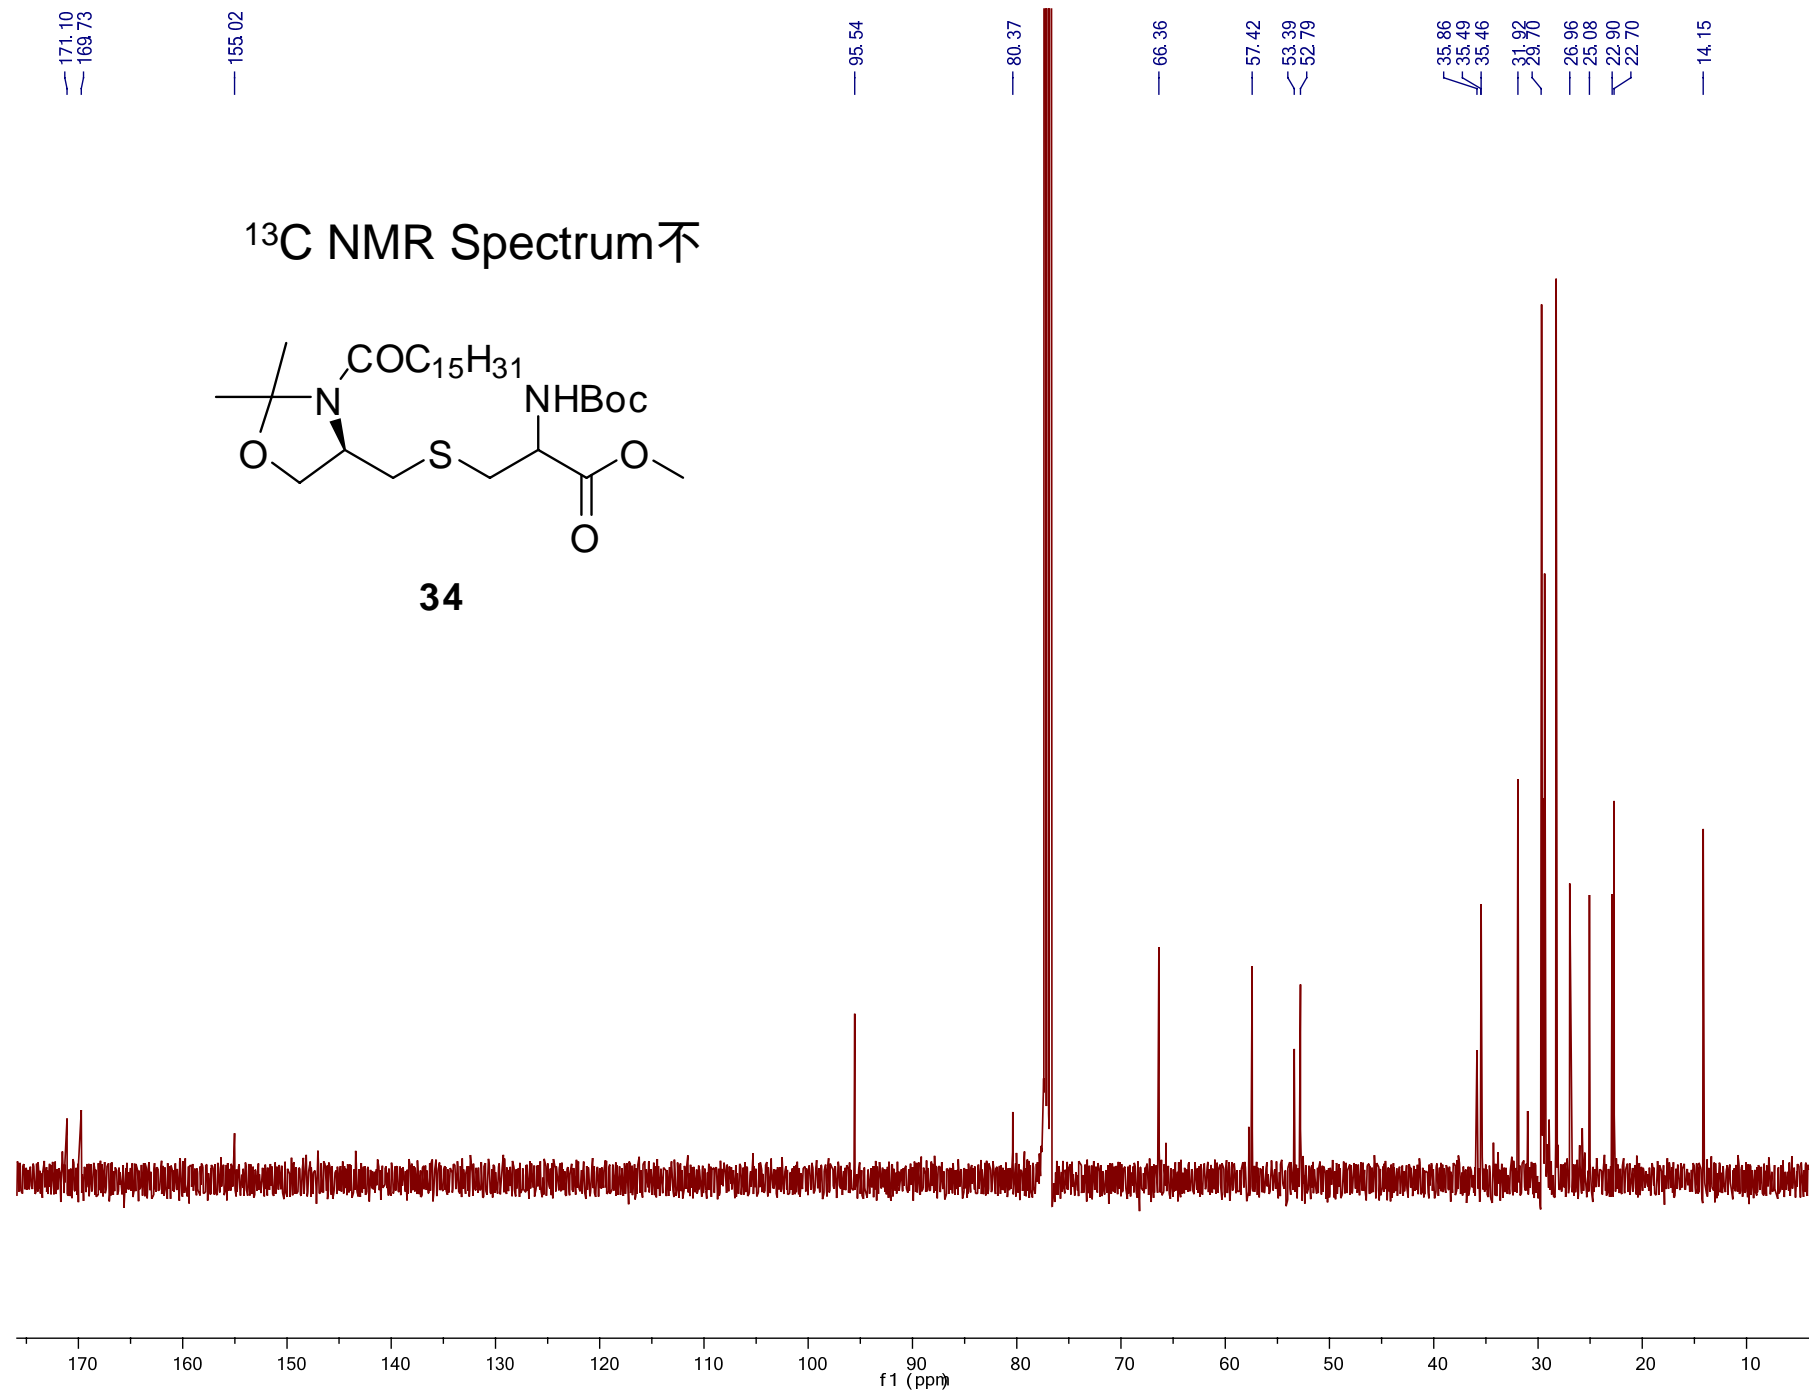

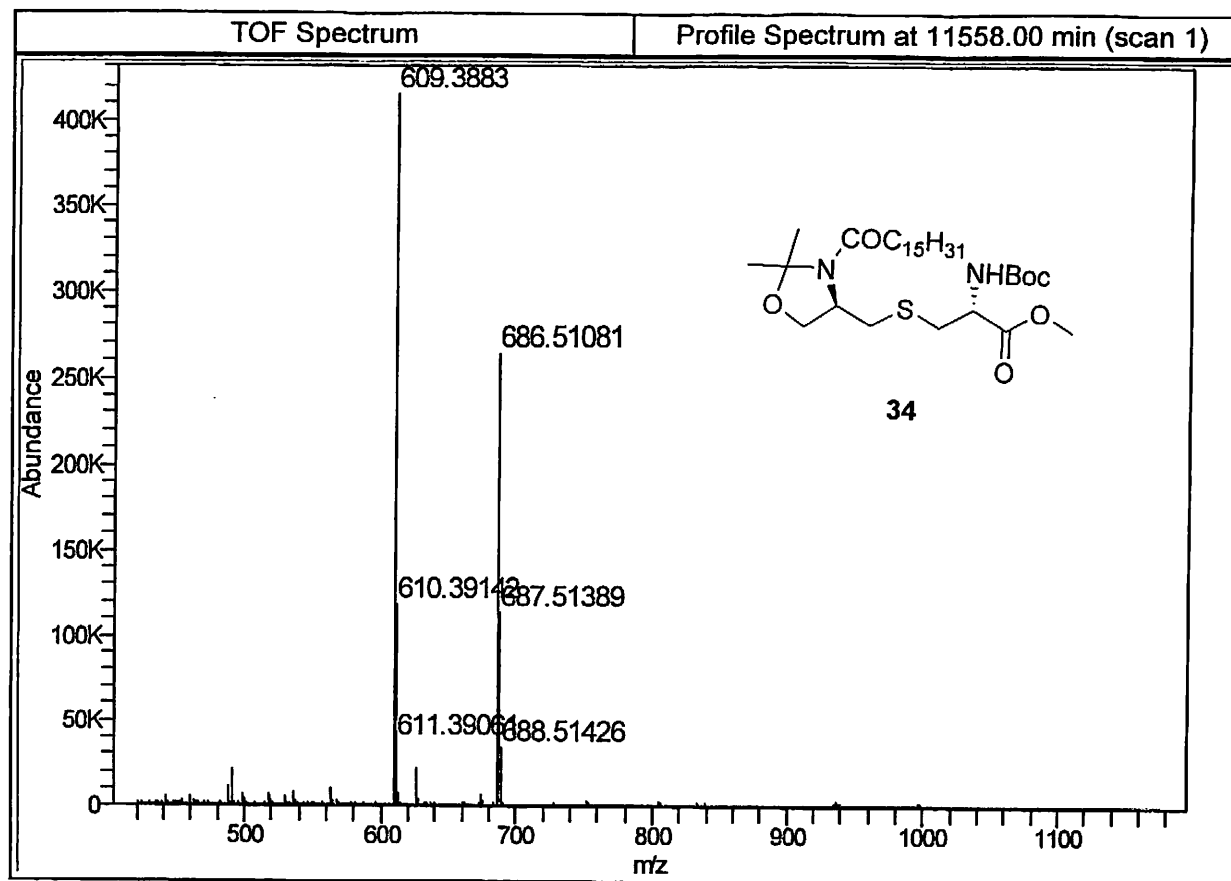

$^1\text{H}$  NMR Spectrum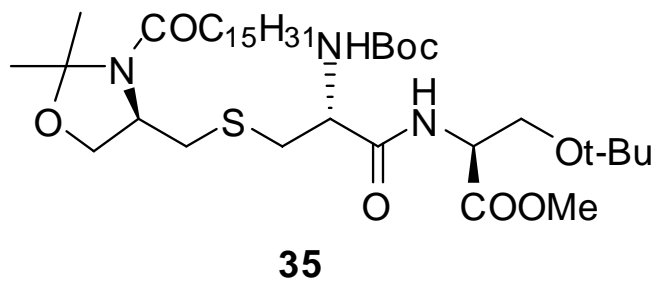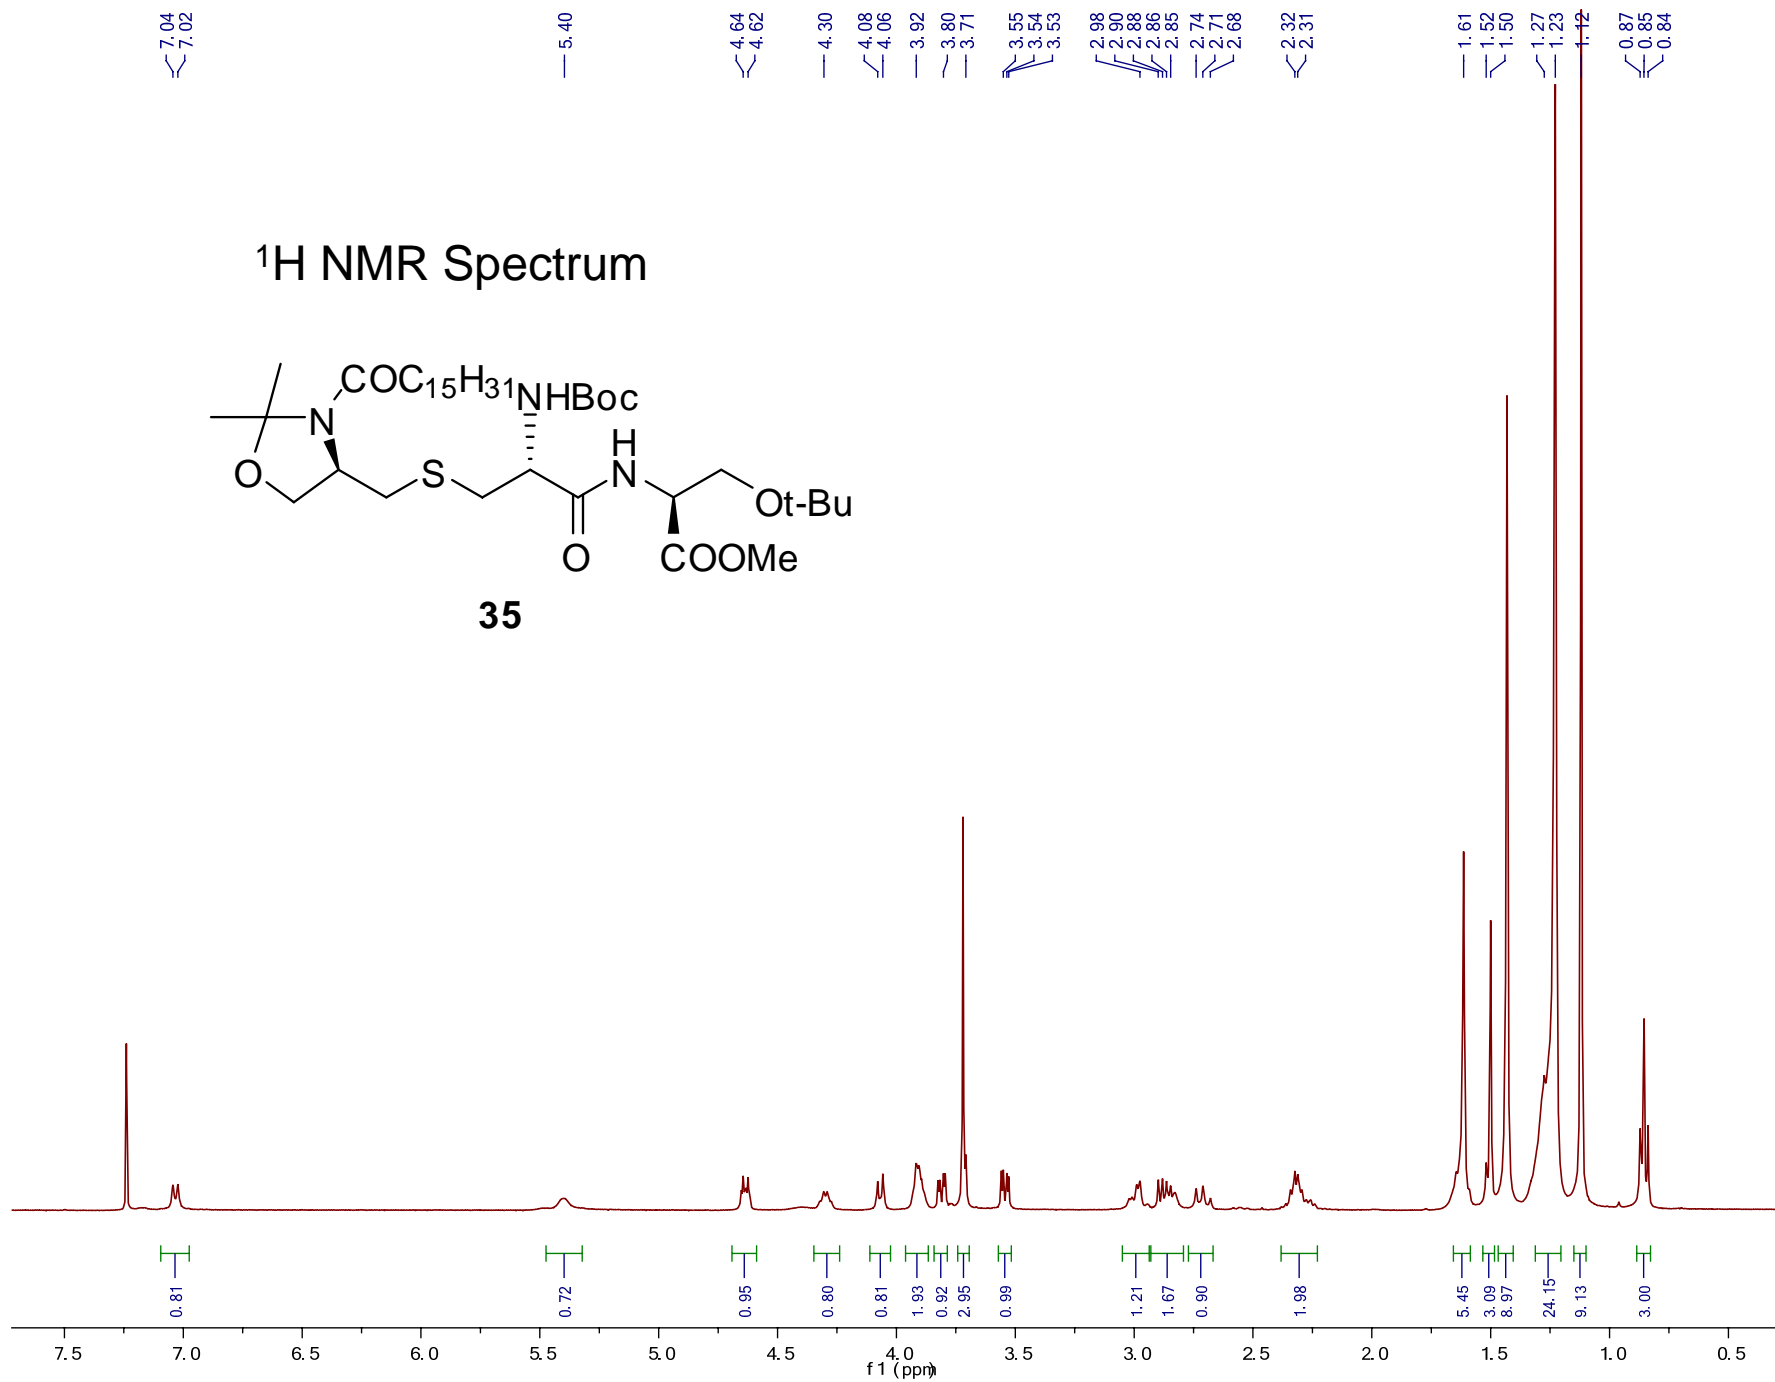

173.80  
170.63  
170.51  
170.02

### $^{13}\text{C}$ NMR Spectrum

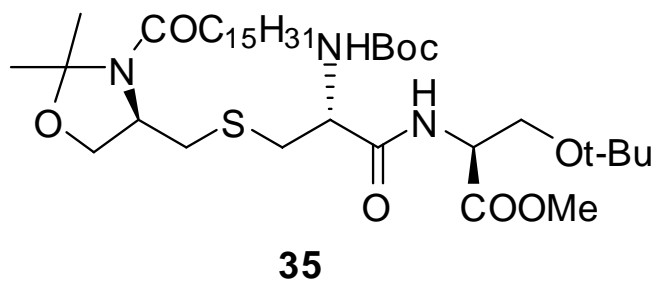

95.57

80.38

73.69  
73.58

66.43

63.58

61.68  
61.61

57.45

53.15

52.50

52.48  
51.49

36.71

35.40

35.16

35.13

34.09

29.38

28.32

27.28

25.16

22.96

22.70

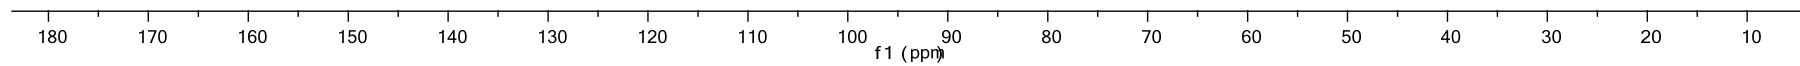



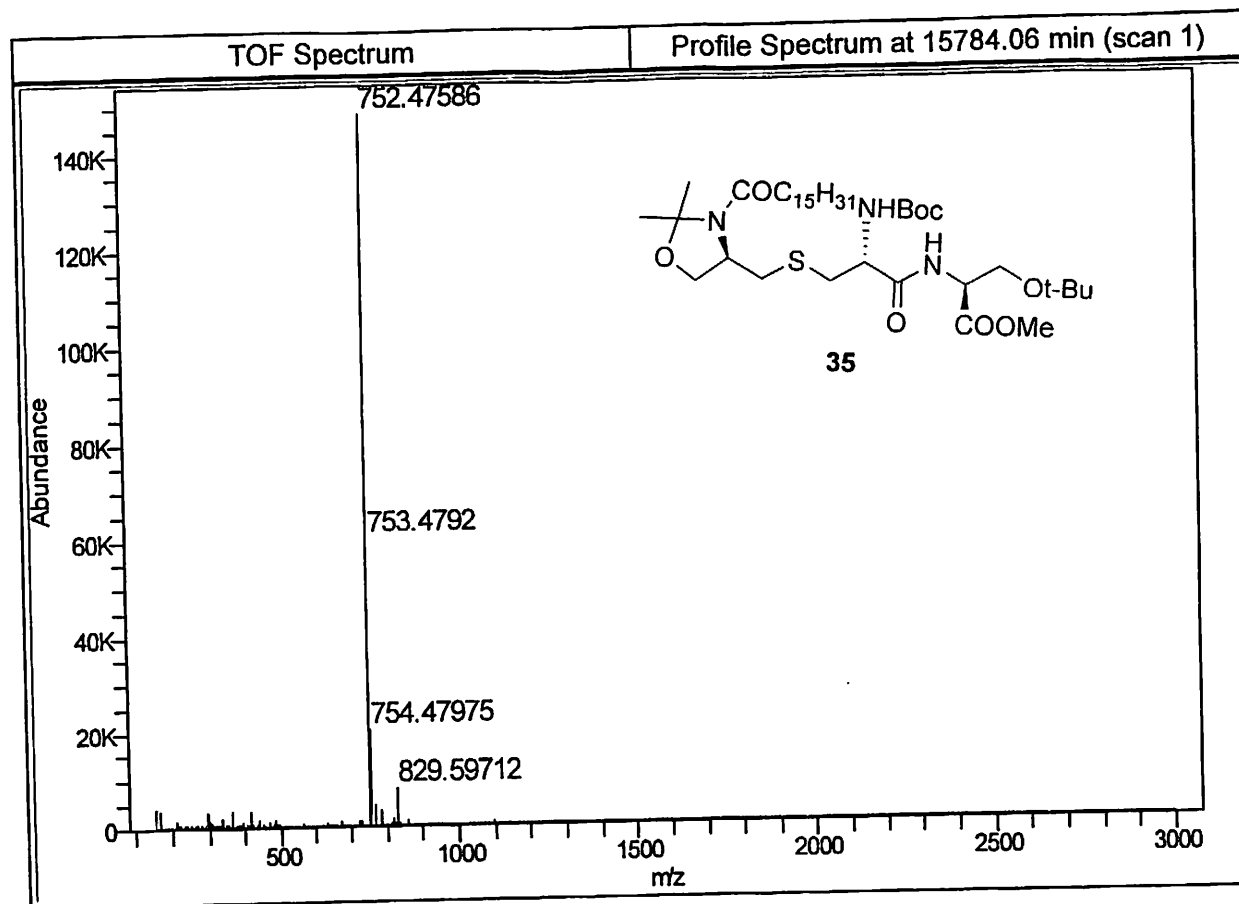

$^1\text{H}$  NMR Spectrum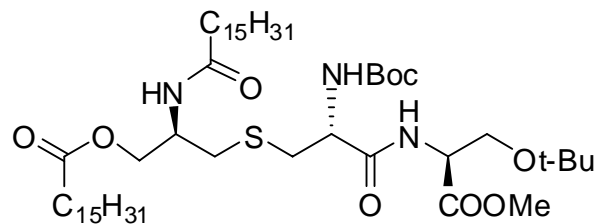**36**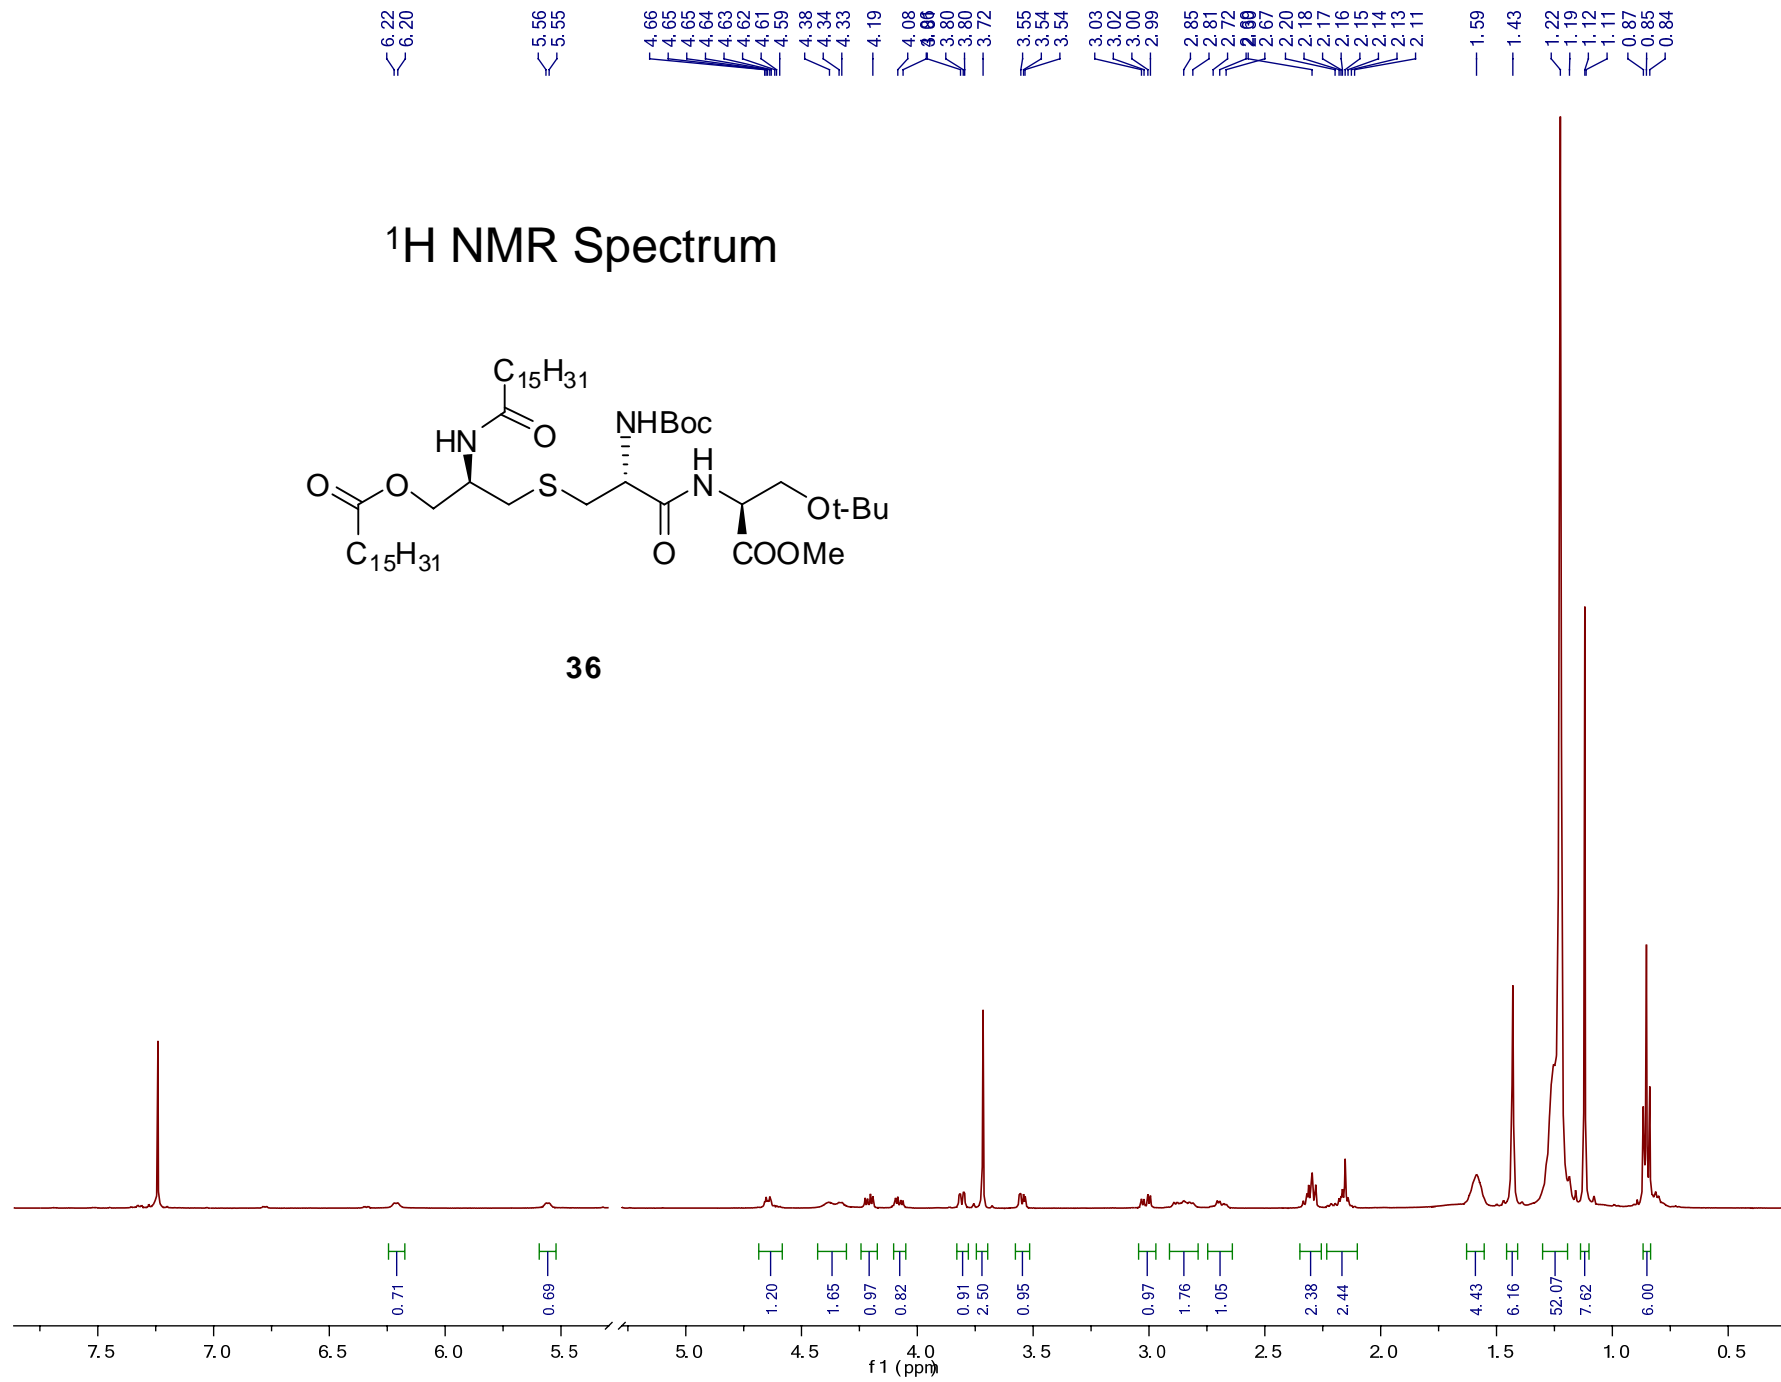



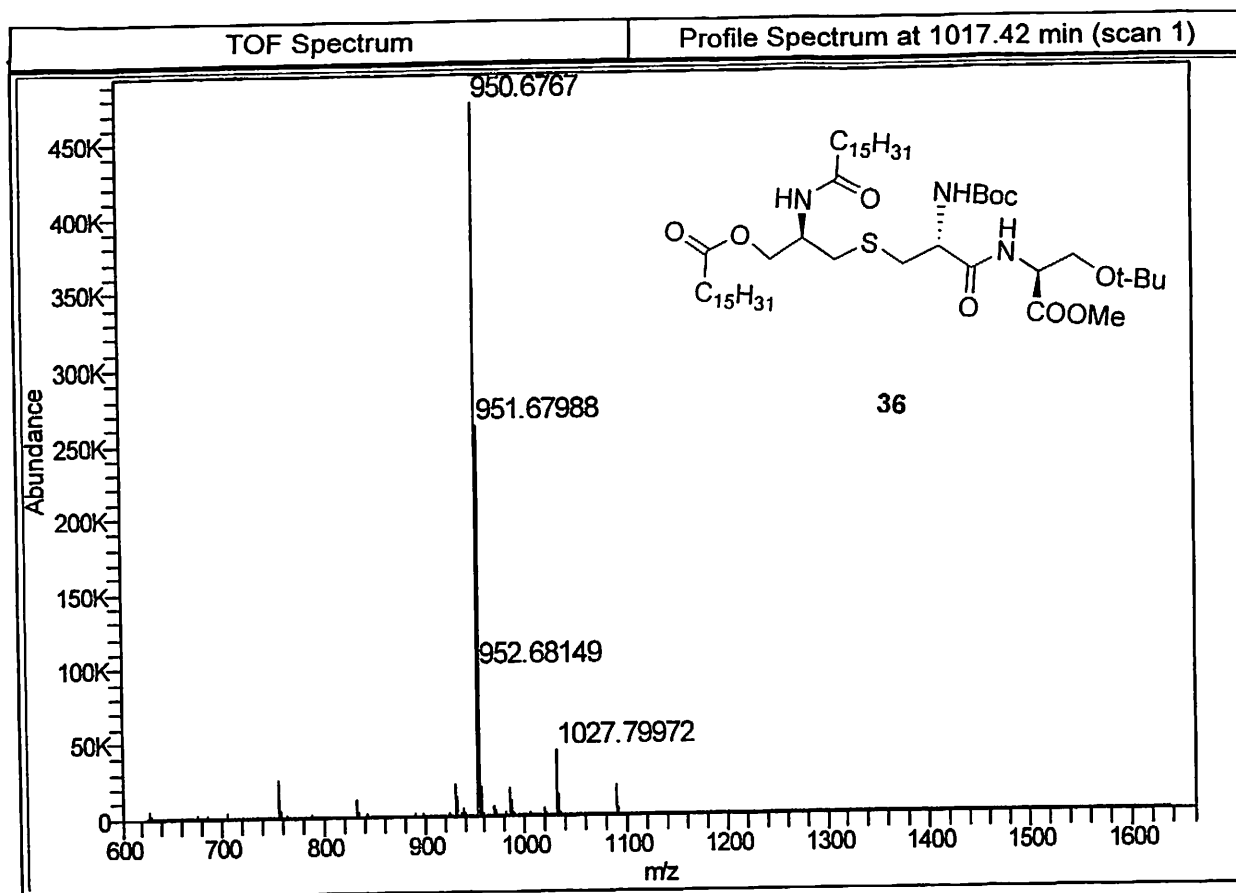

— 8.46

— 6.57

— 4.67

— 4.38

— 4.29

— 4.11

— 3.94

— 3.74

— 3.72

— 3.14

— 3.08

— 2.87

— 2.71

— 2.29

— 2.28

— 2.25

— 2.24

— 2.22

— 2.19

— 1.60

— 1.58

— 1.57

— 1.55

— 1.23

— 1.19

— 0.87

— 0.85

— 0.84

# $^1\text{H}$ NMR Spectrum

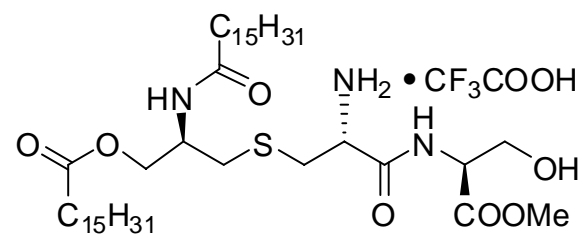**37**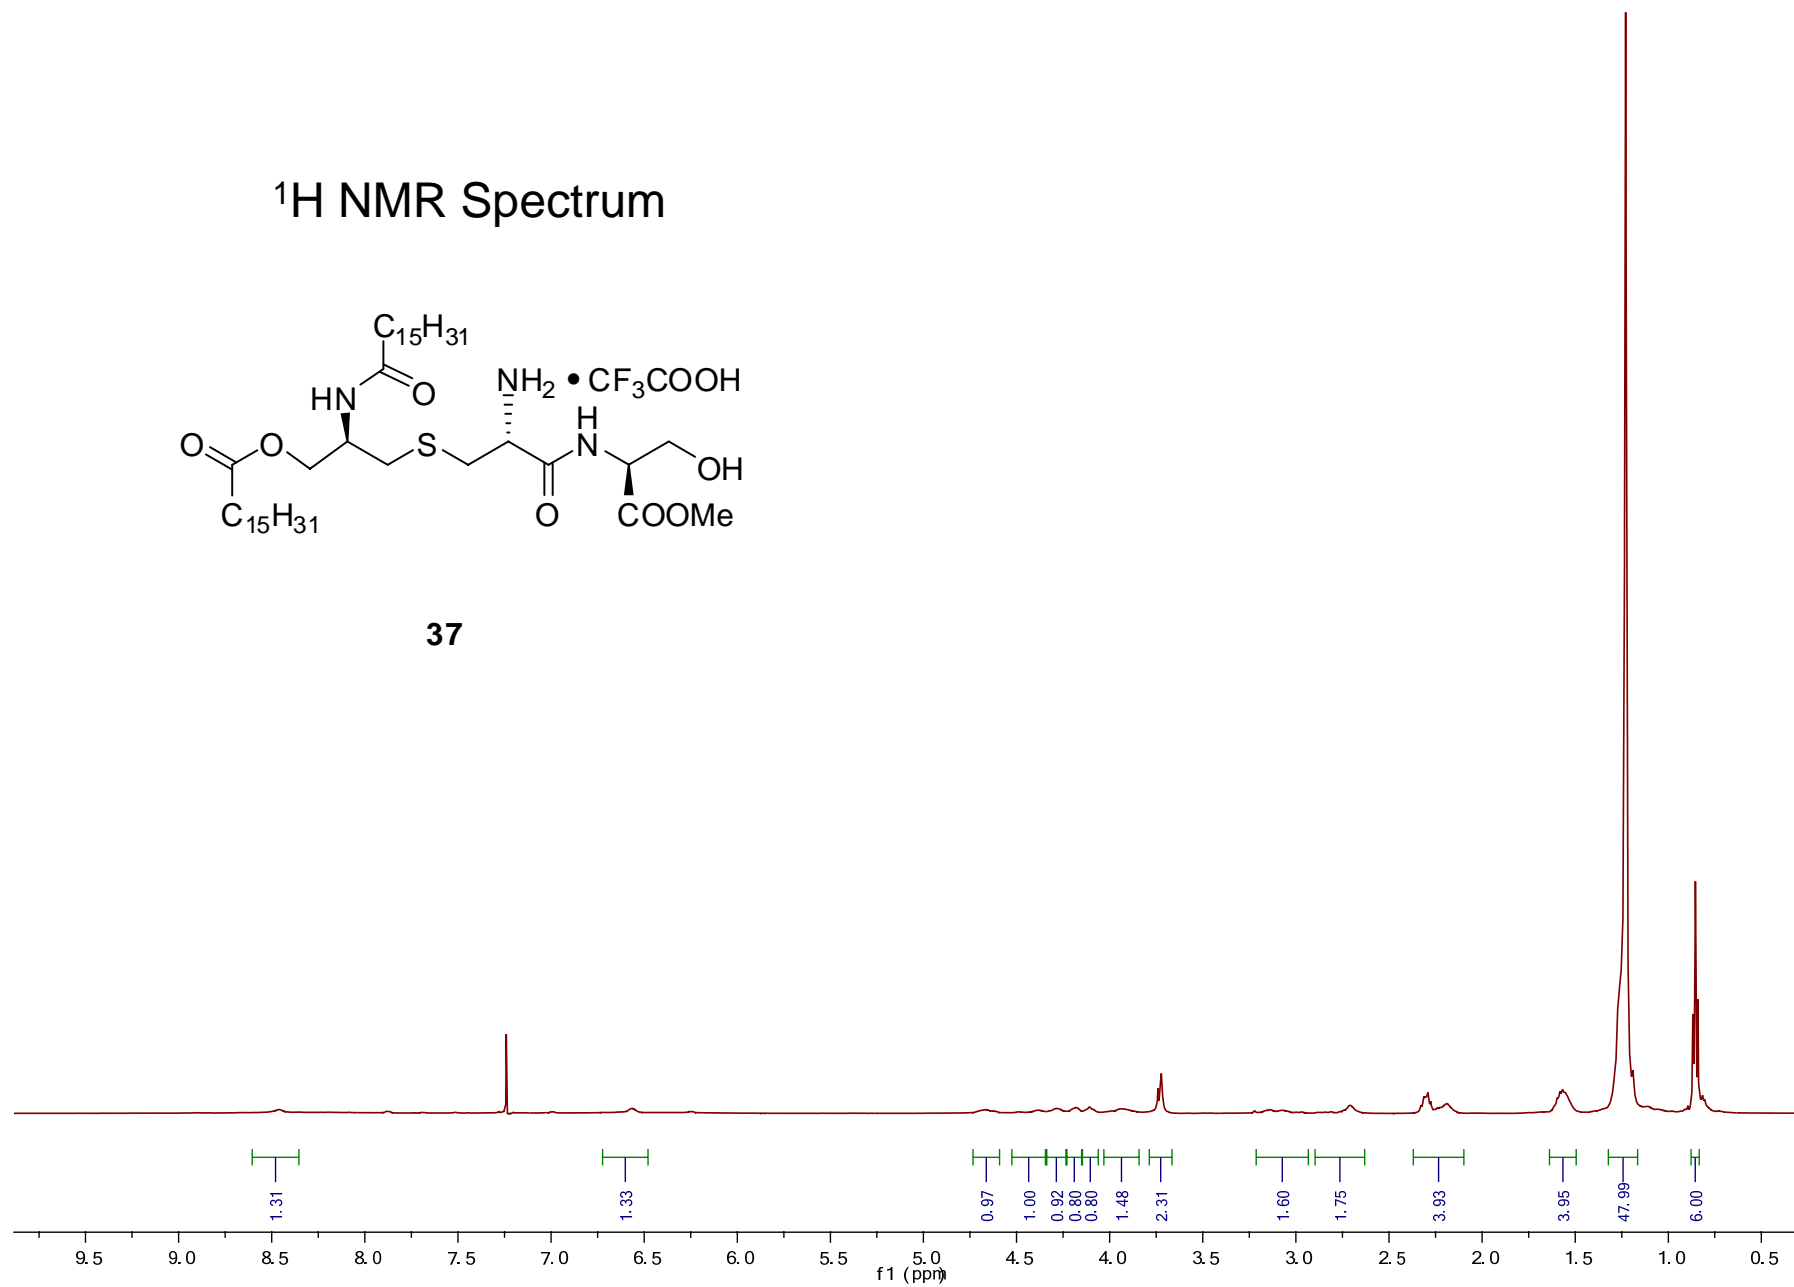

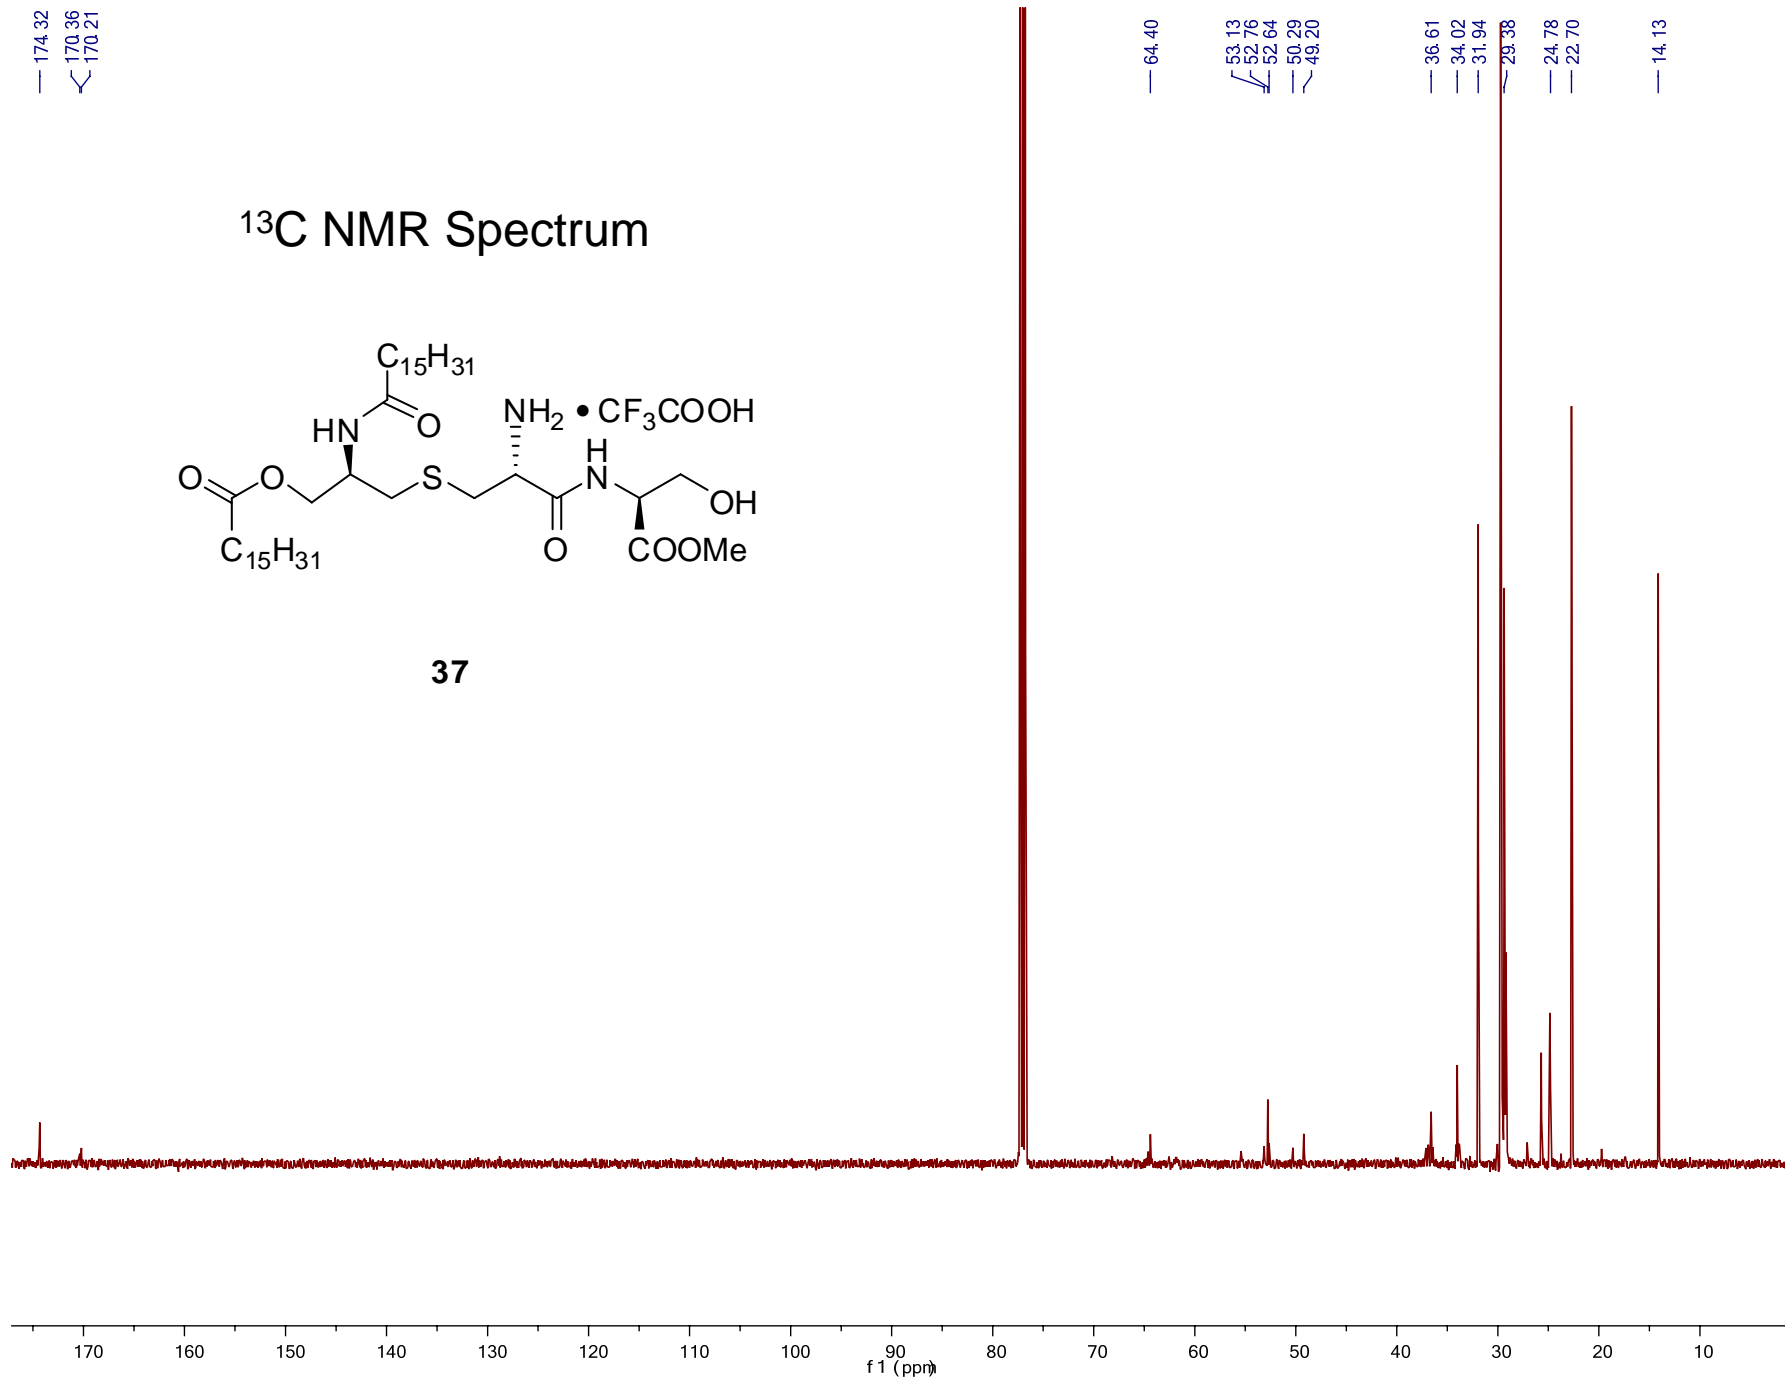

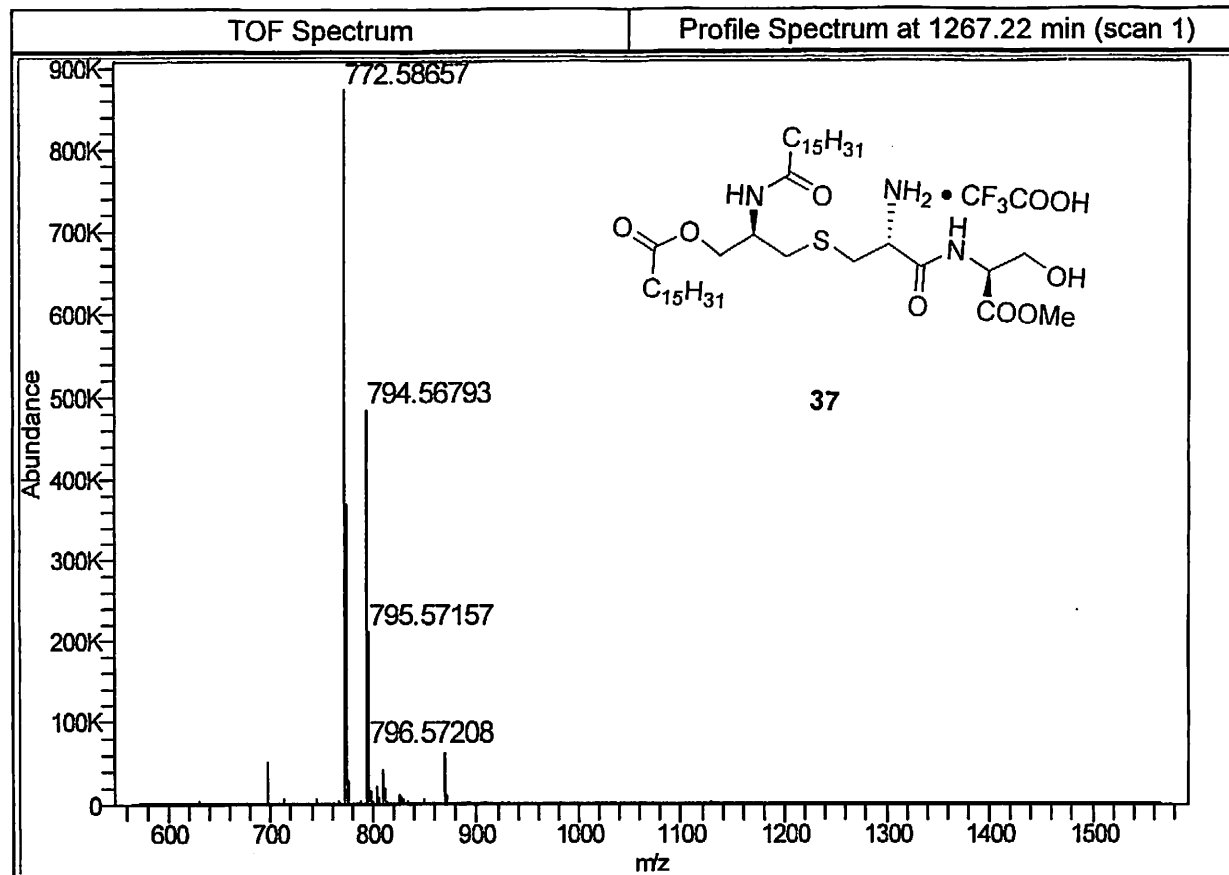

$^1\text{H}$  NMR Spectrum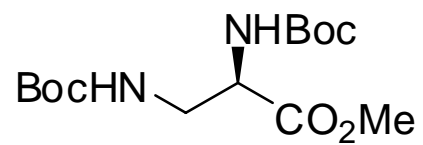**38**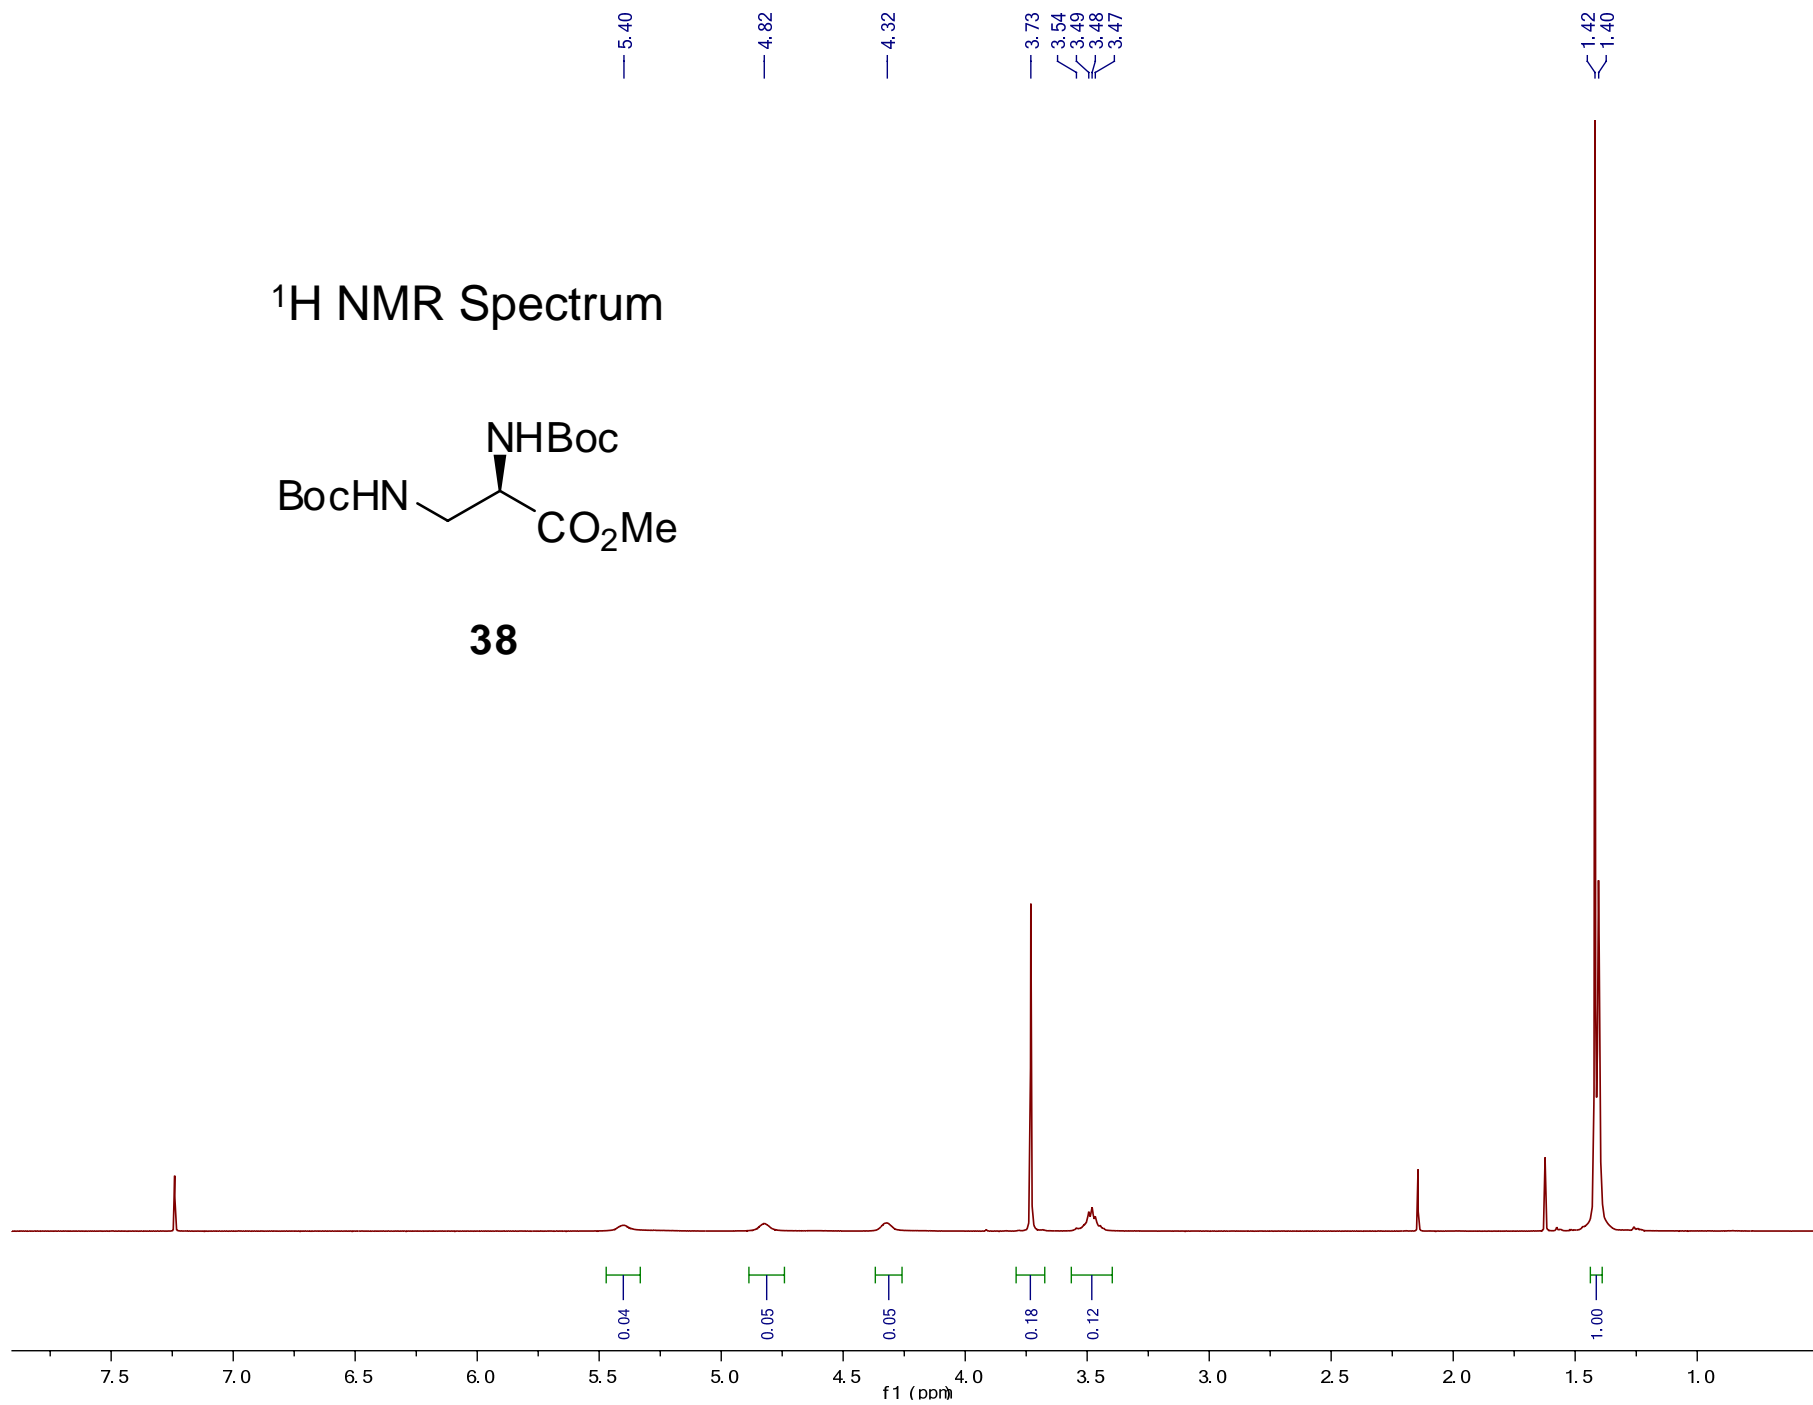



— 171.30

— 156.13  
— 155.41— 80.14  
— 79.85— 54.17  
— 52.65

— 42.40

— 30.95  
— 28.29  
— 28.28 $^{13}\text{C}$  NMR Spectrum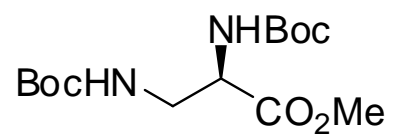**38**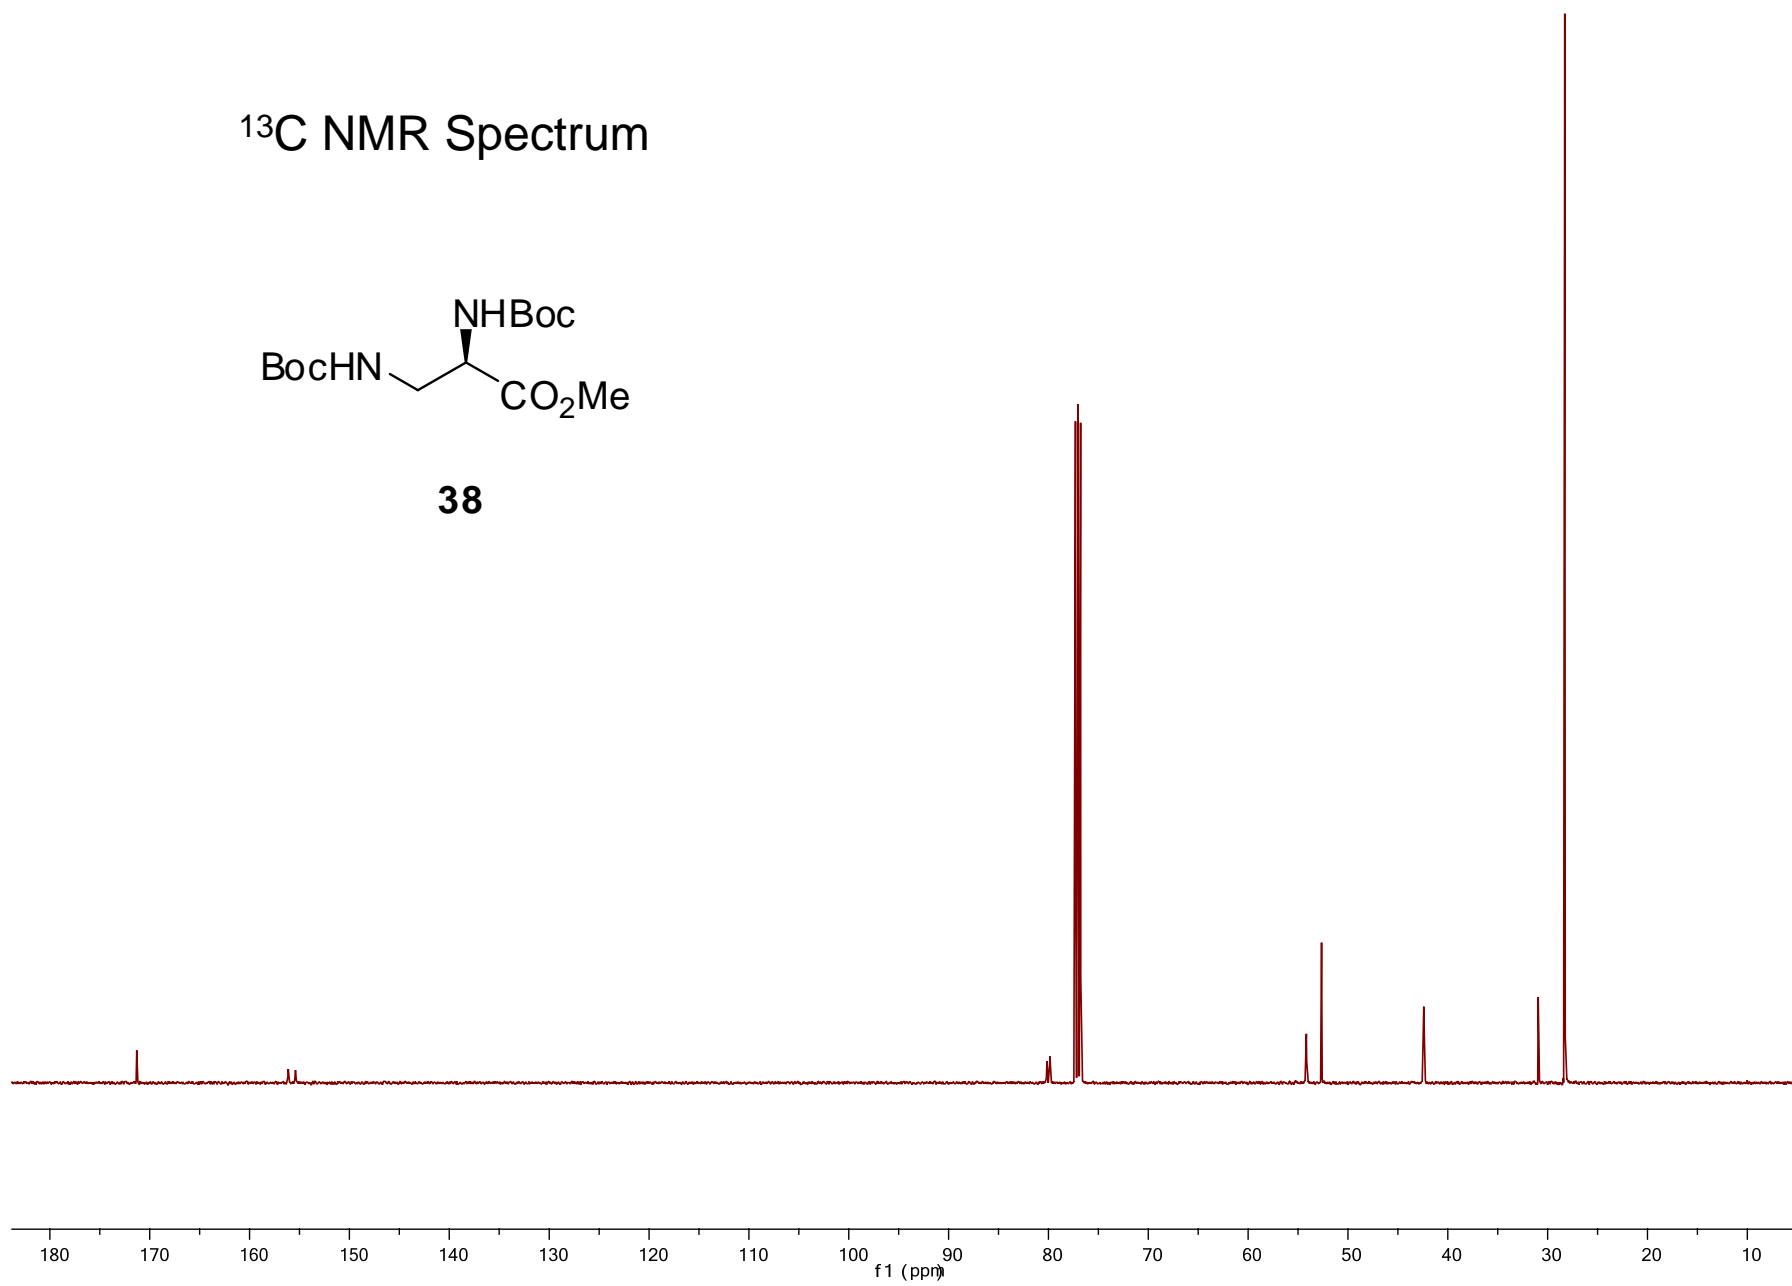

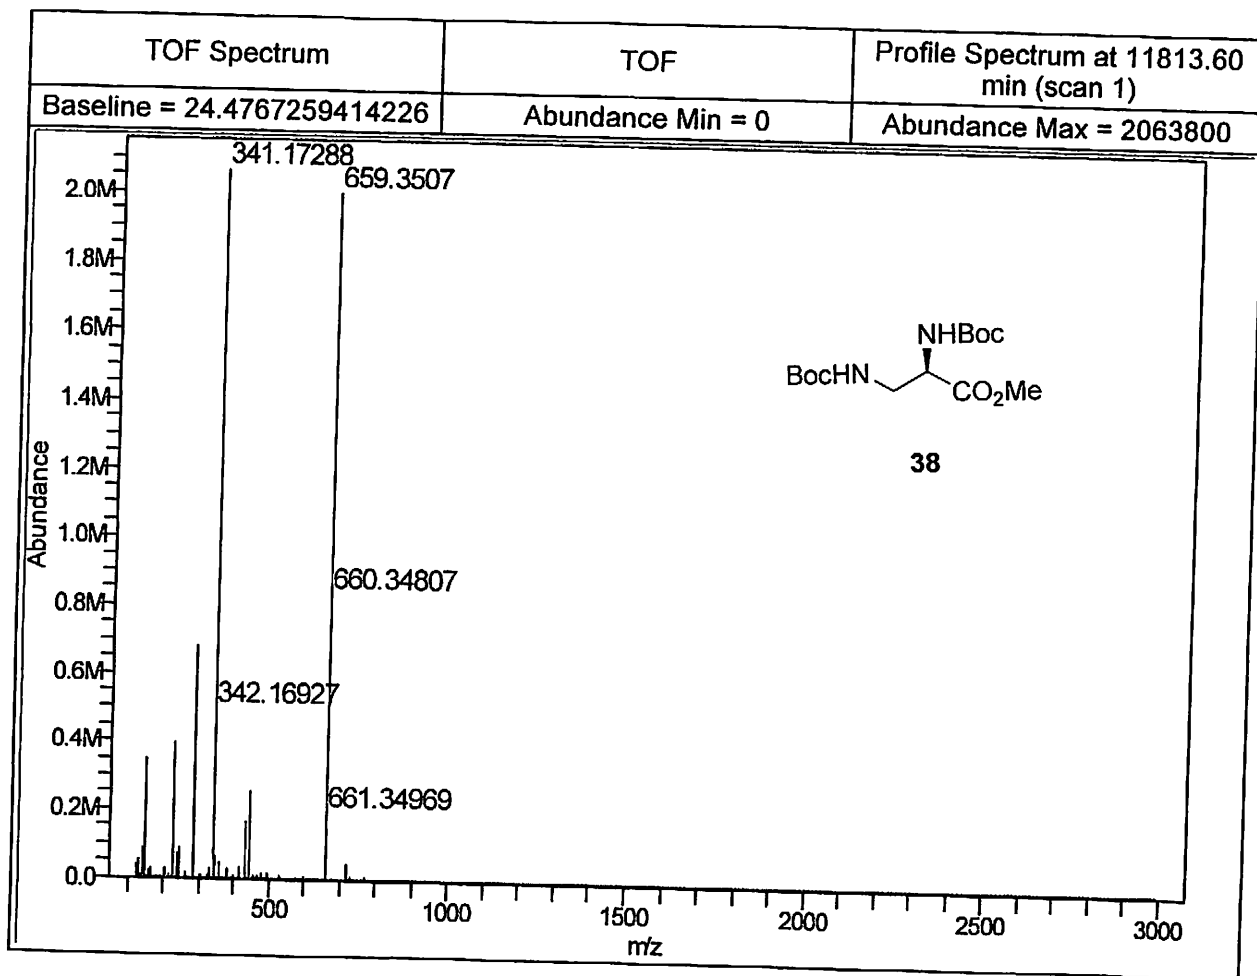

# <sup>1</sup>H NMR Spectrum

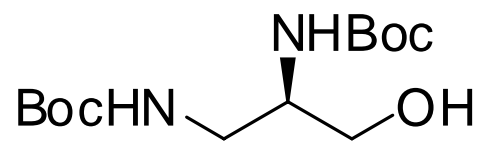

**39**

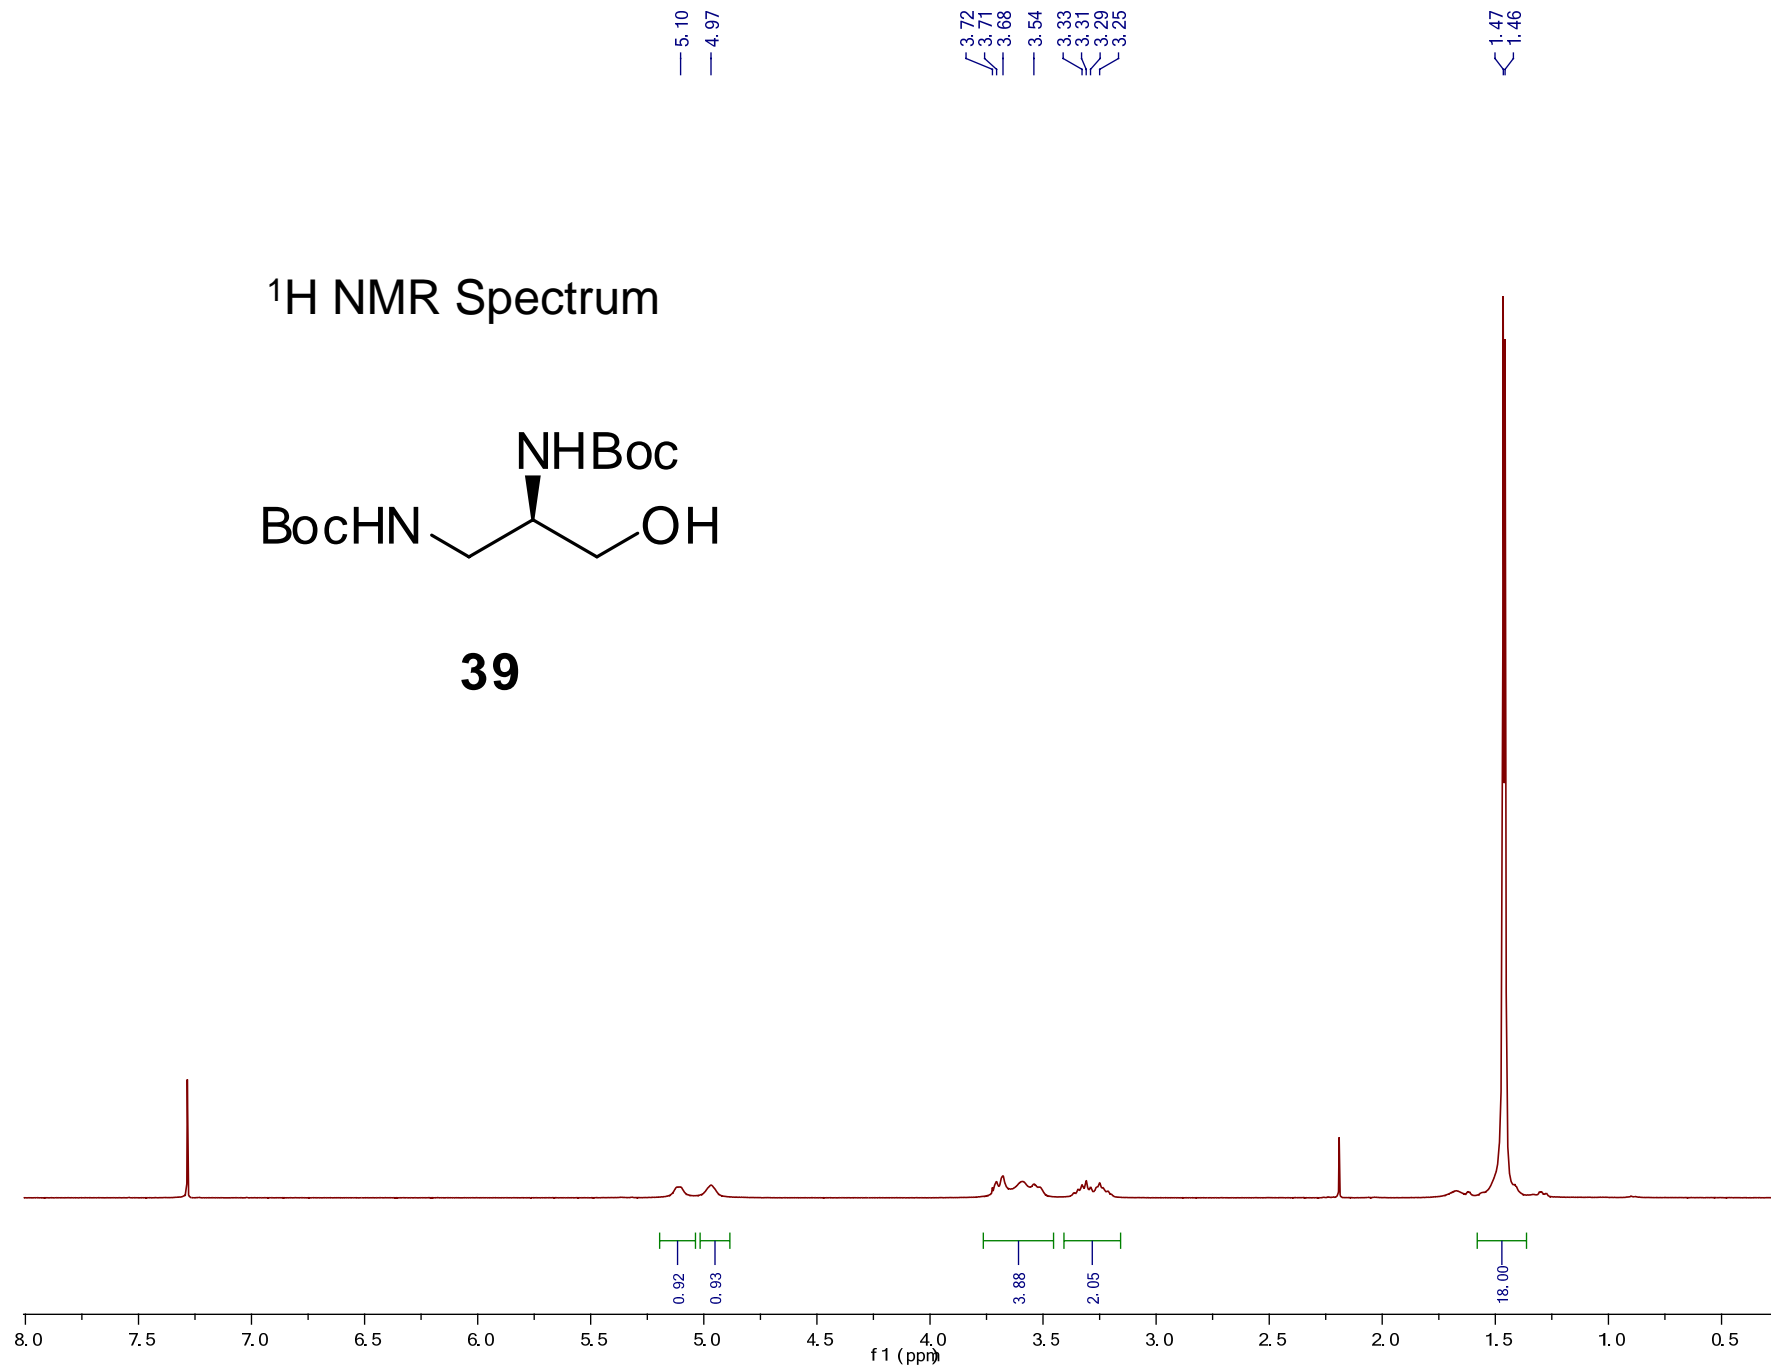

— 157.75  
— 155.74— 80.41  
— 79.62

— 61.56

— 52.27

— 40.12

— 30.95  
— 28.36  
— 28.29 $^{13}\text{C}$  NMR Spectrum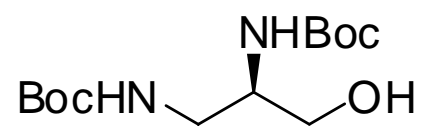**39**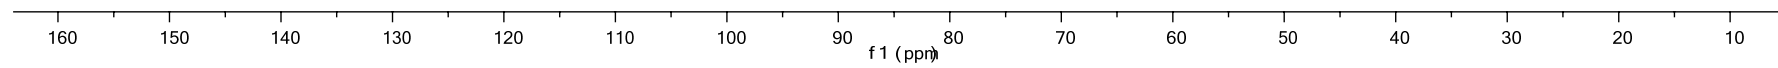

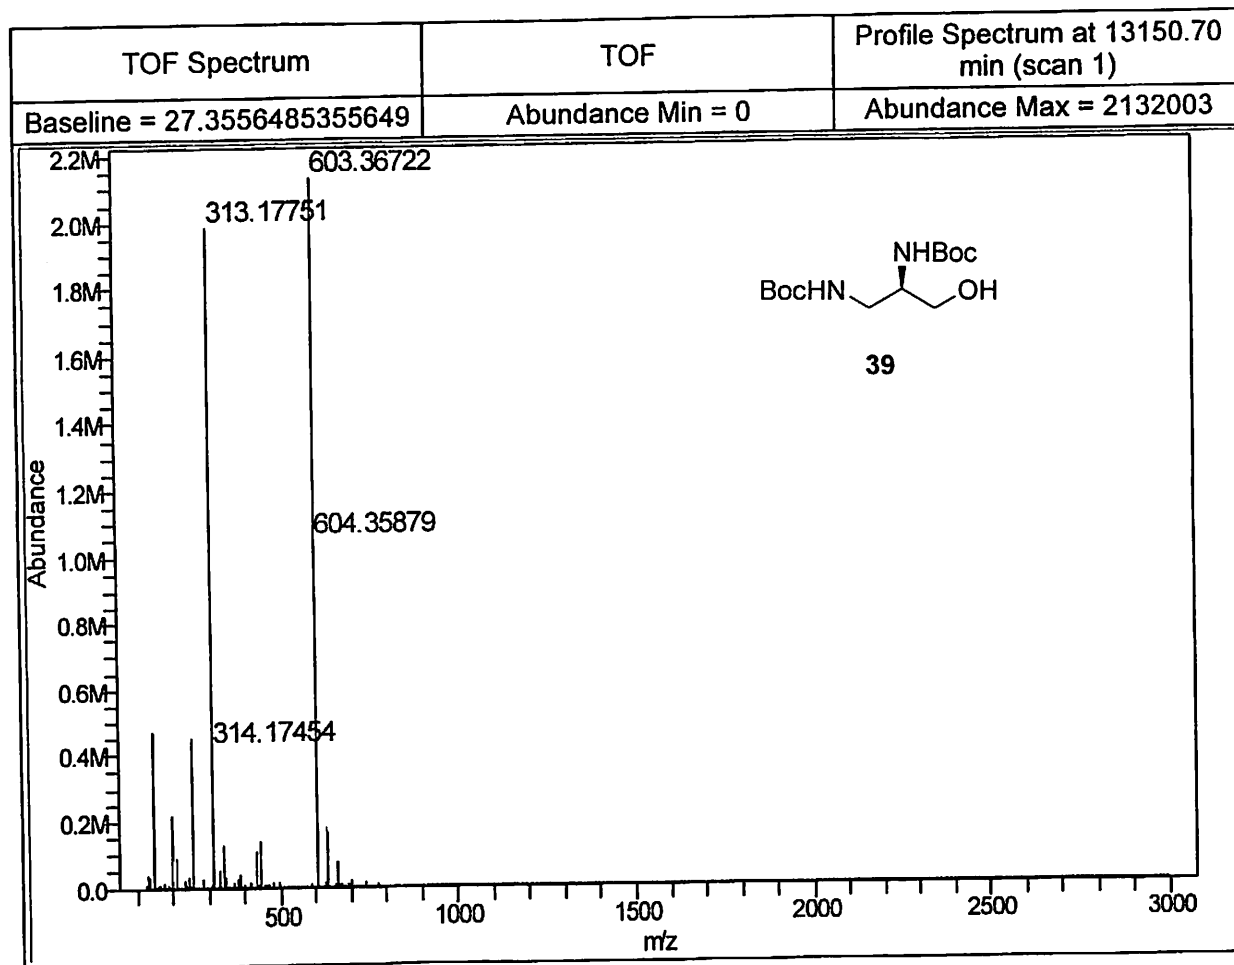

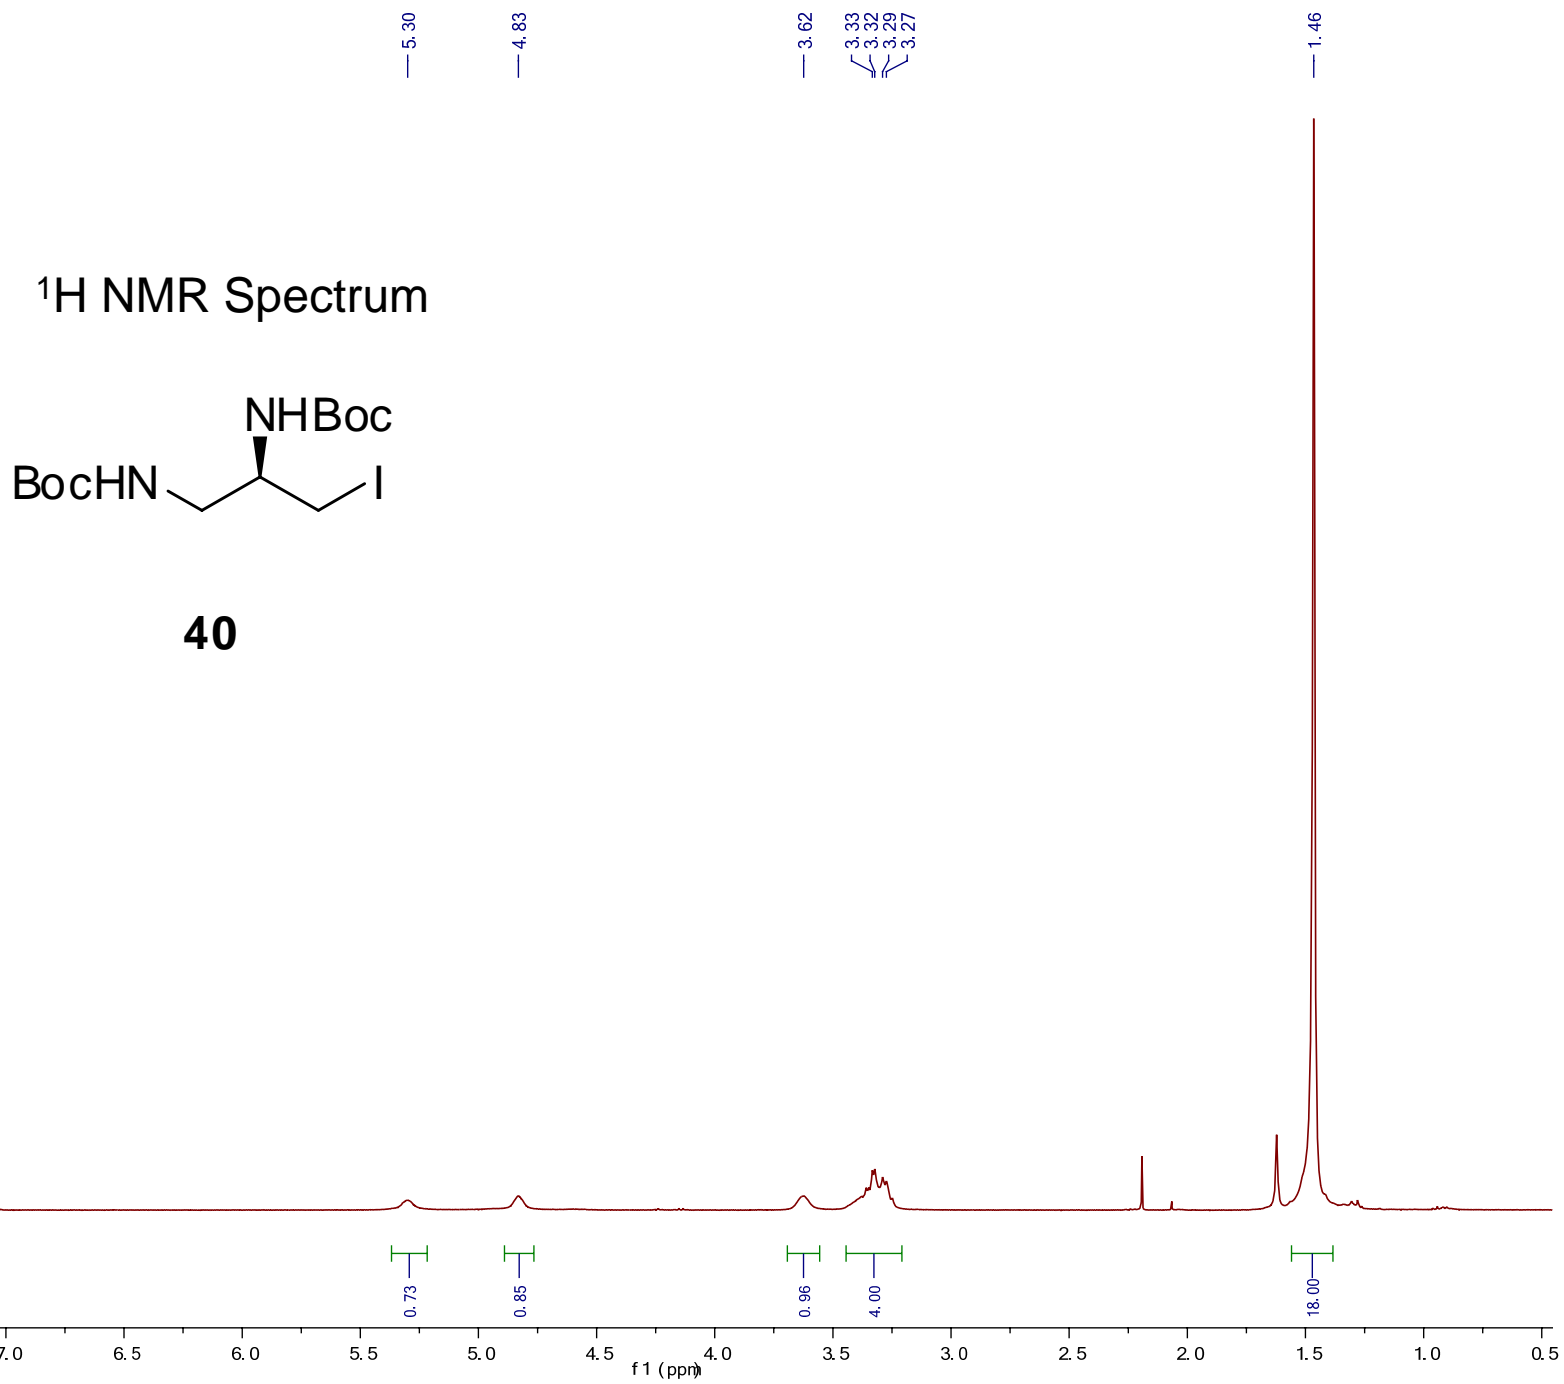

155.76  
154.44

### <sup>13</sup>C NMR Spectrum

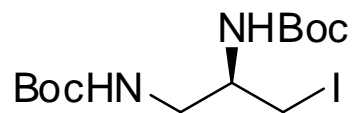

**40**

79.00

50.54

43.16

29.93

27.31  
27.29

7.69

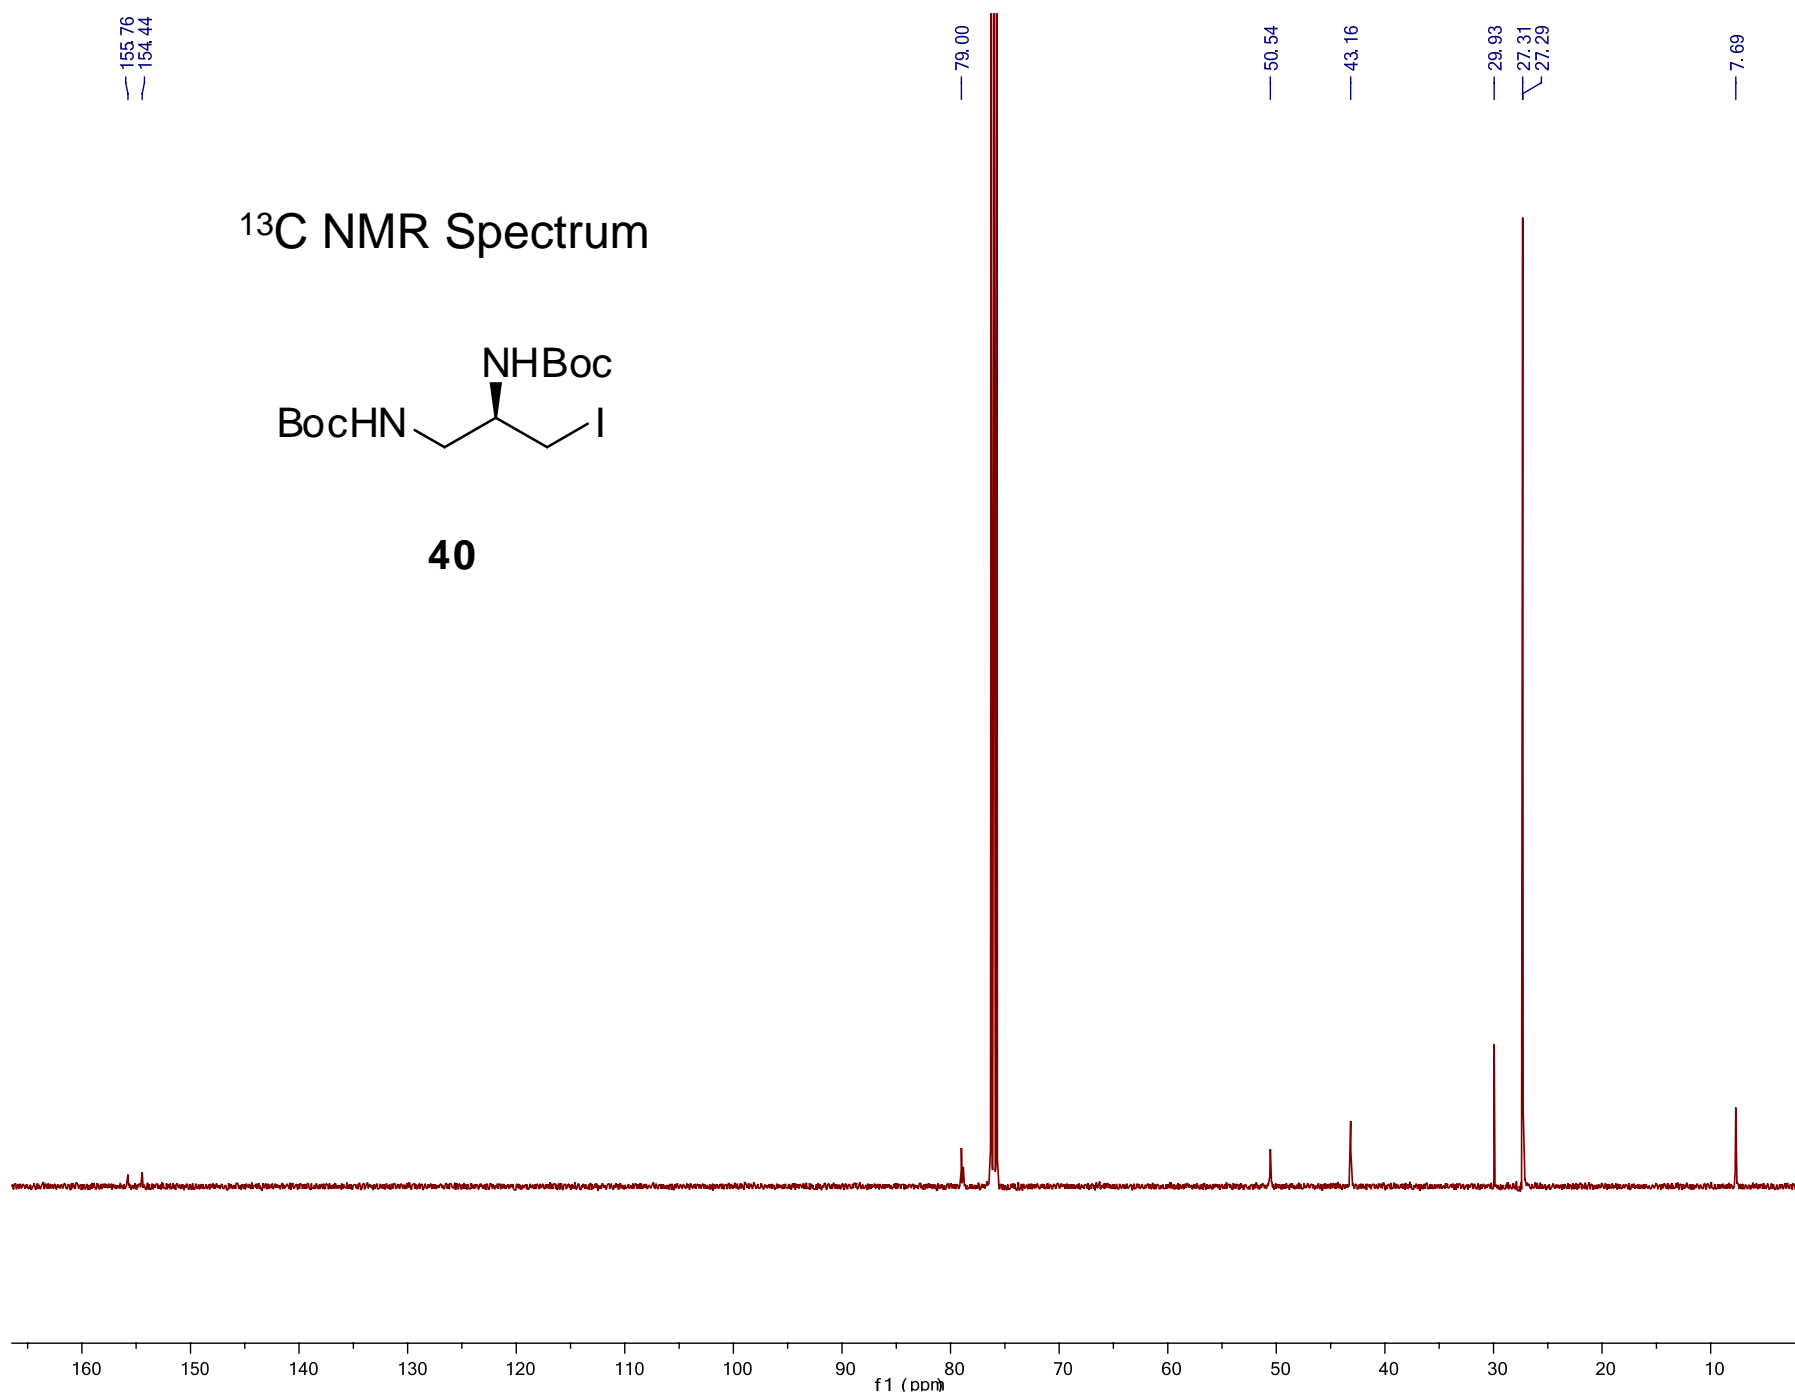

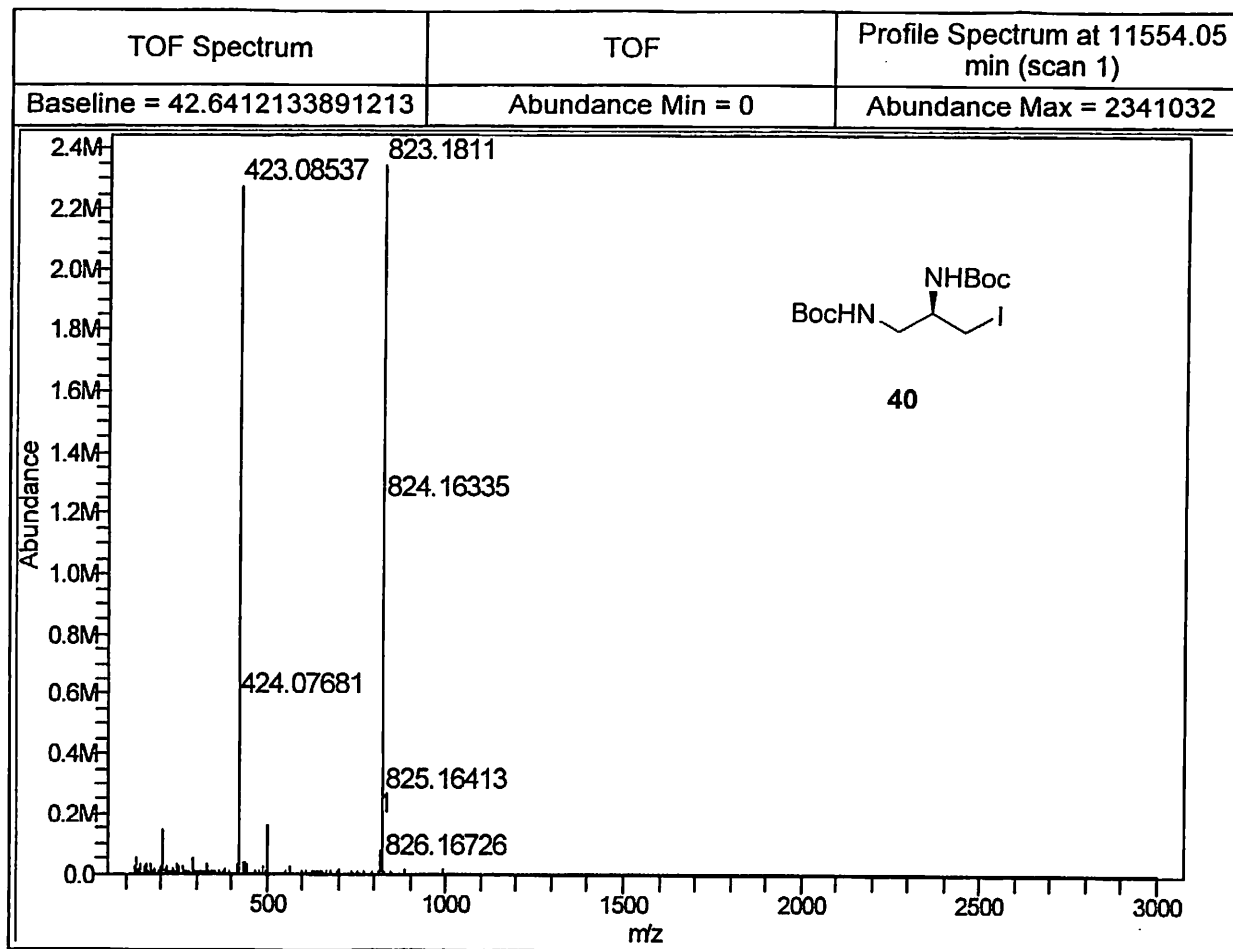



— 5.89

4.77  
4.74  
4.72  
4.69  
4.68  
4.67  
4.66  
4.65  
4.64

— 3.80

3.04  
3.03  
3.011.45  
1.43  
1.41  
1.39  
1.37

$^1\text{H}$  NMR (400 MHz,  $\text{CDCl}_3$ )  $\delta$  5.89 (s, 1H), 4.73 (q,  $J = 11.9$ , 2H), 4.66 (dt,  $J = 4.2, 8.1$ , 1H), 3.80 (s, 3H), 3.02 (dd,  $J = 4.0, 9.1$ , 2H), 1.46 – 1.35 (m, 1H).

### $^1\text{H}$ NMR Spectrum

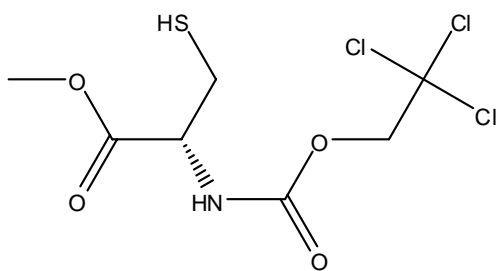

**Troc-L-Cys-OMe**

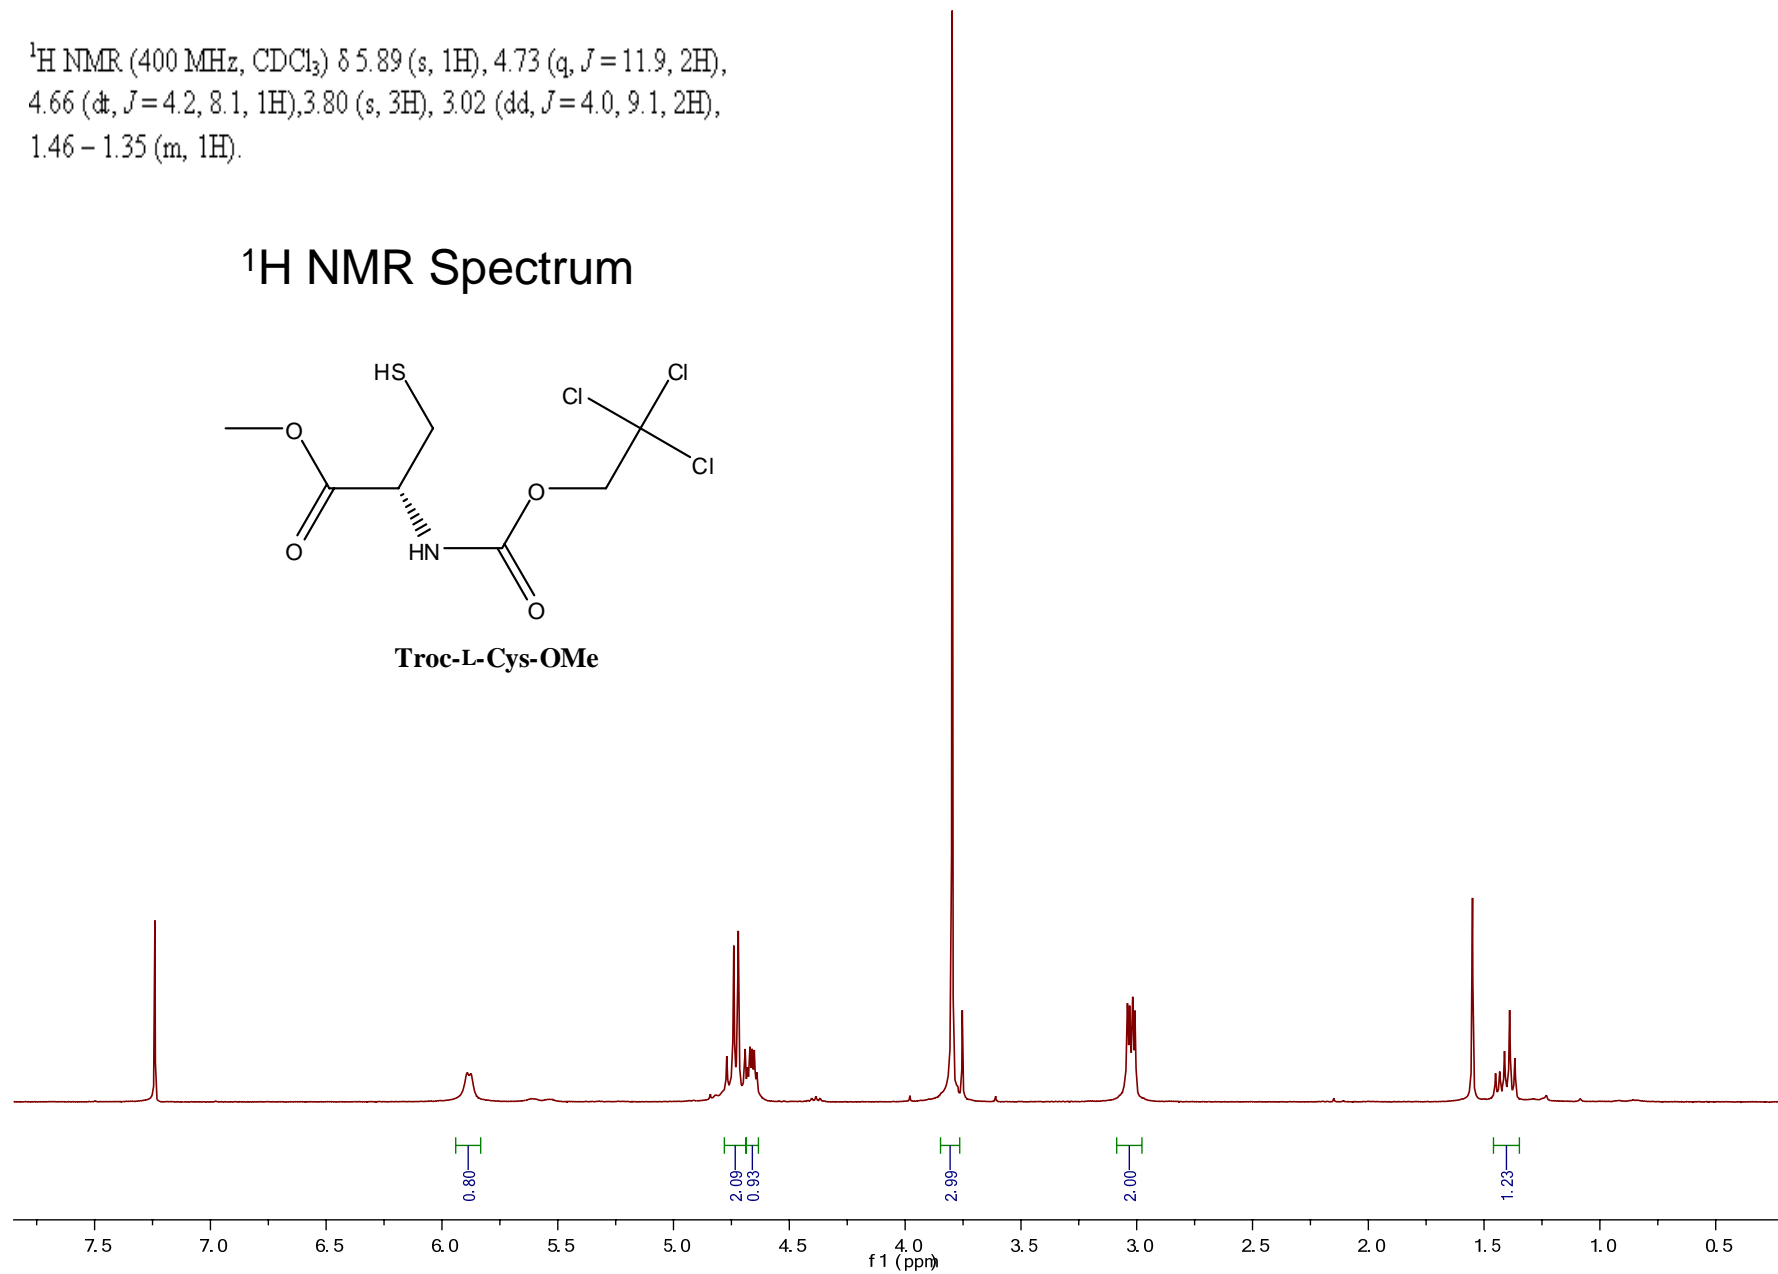

+TDF MS: 0.008 to 0.424 min from 07.20.09 Yan N-Troc-Cys-OMe (pos).wiff Agilent

Max: 6.2e5 count

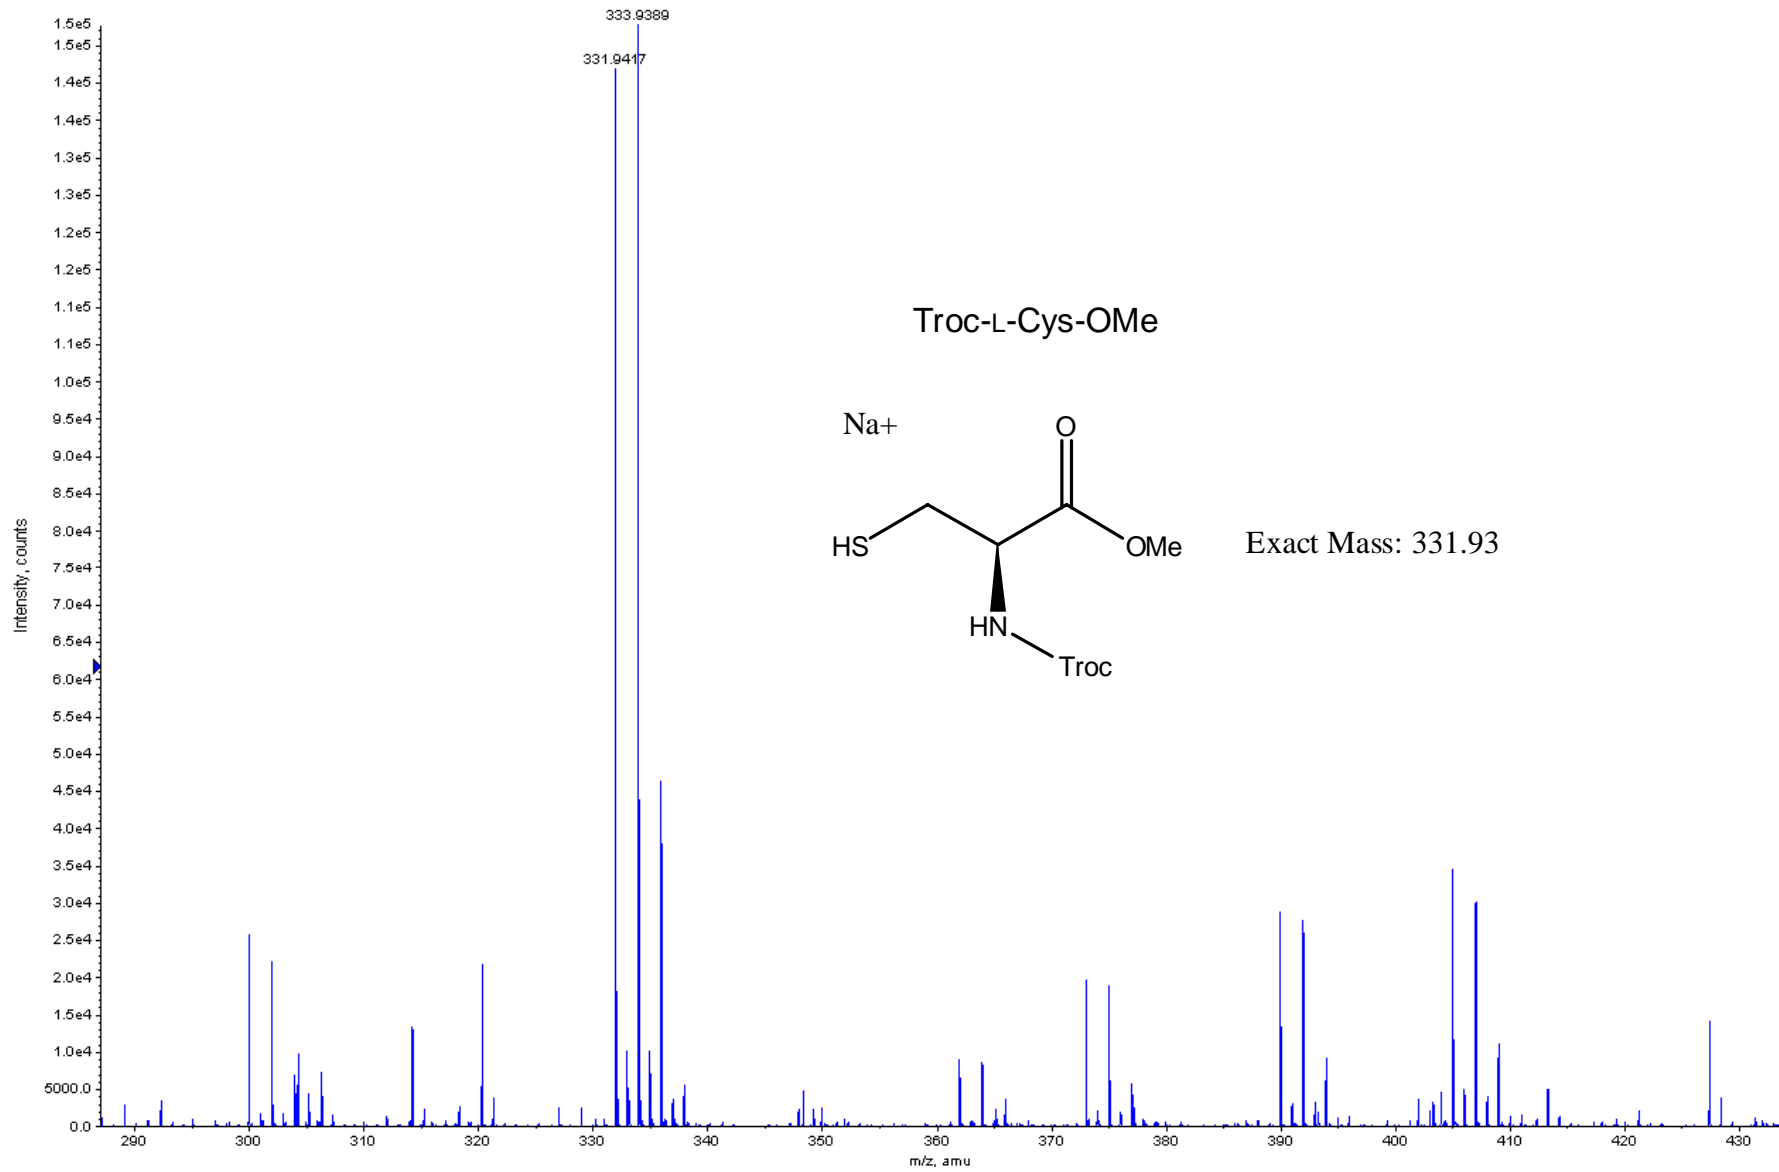

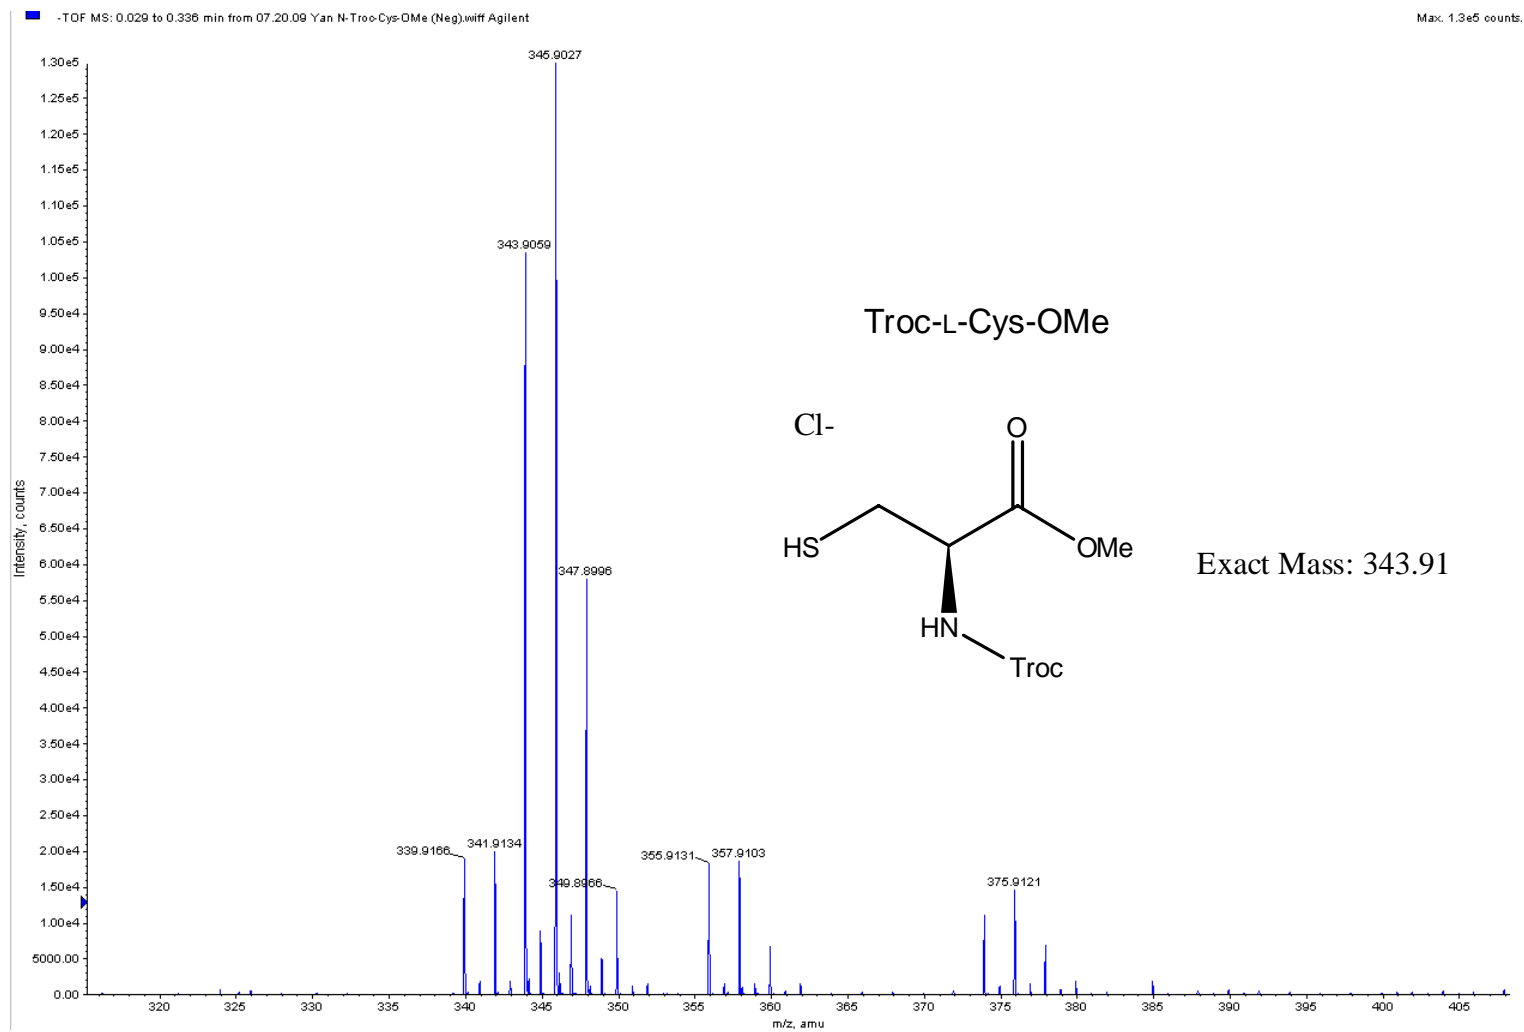

6.91  
6.906.20  
6.194.81  
4.79  
4.78  
4.75  
4.69  
4.67  
4.66  
4.65  
4.59  
4.58  
4.57

3.98

3.76  
3.763.48  
3.47  
3.453.36  
3.343.08  
3.04  
3.002.90  
2.88  
2.86  
2.842.48  
2.46  
2.452.18  
2.17  
2.16  
2.15  
2.13  
2.12  
2.11

1.56

1.22

0.87  
0.85  
0.84

# $^1\text{H}$ NMR Spectrum

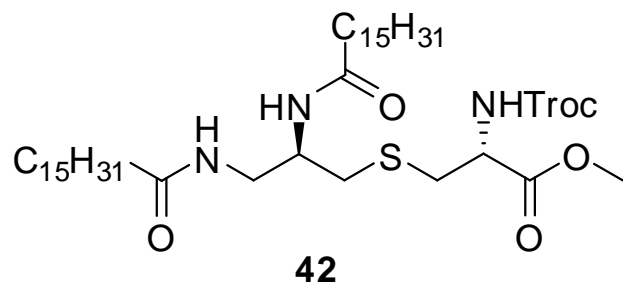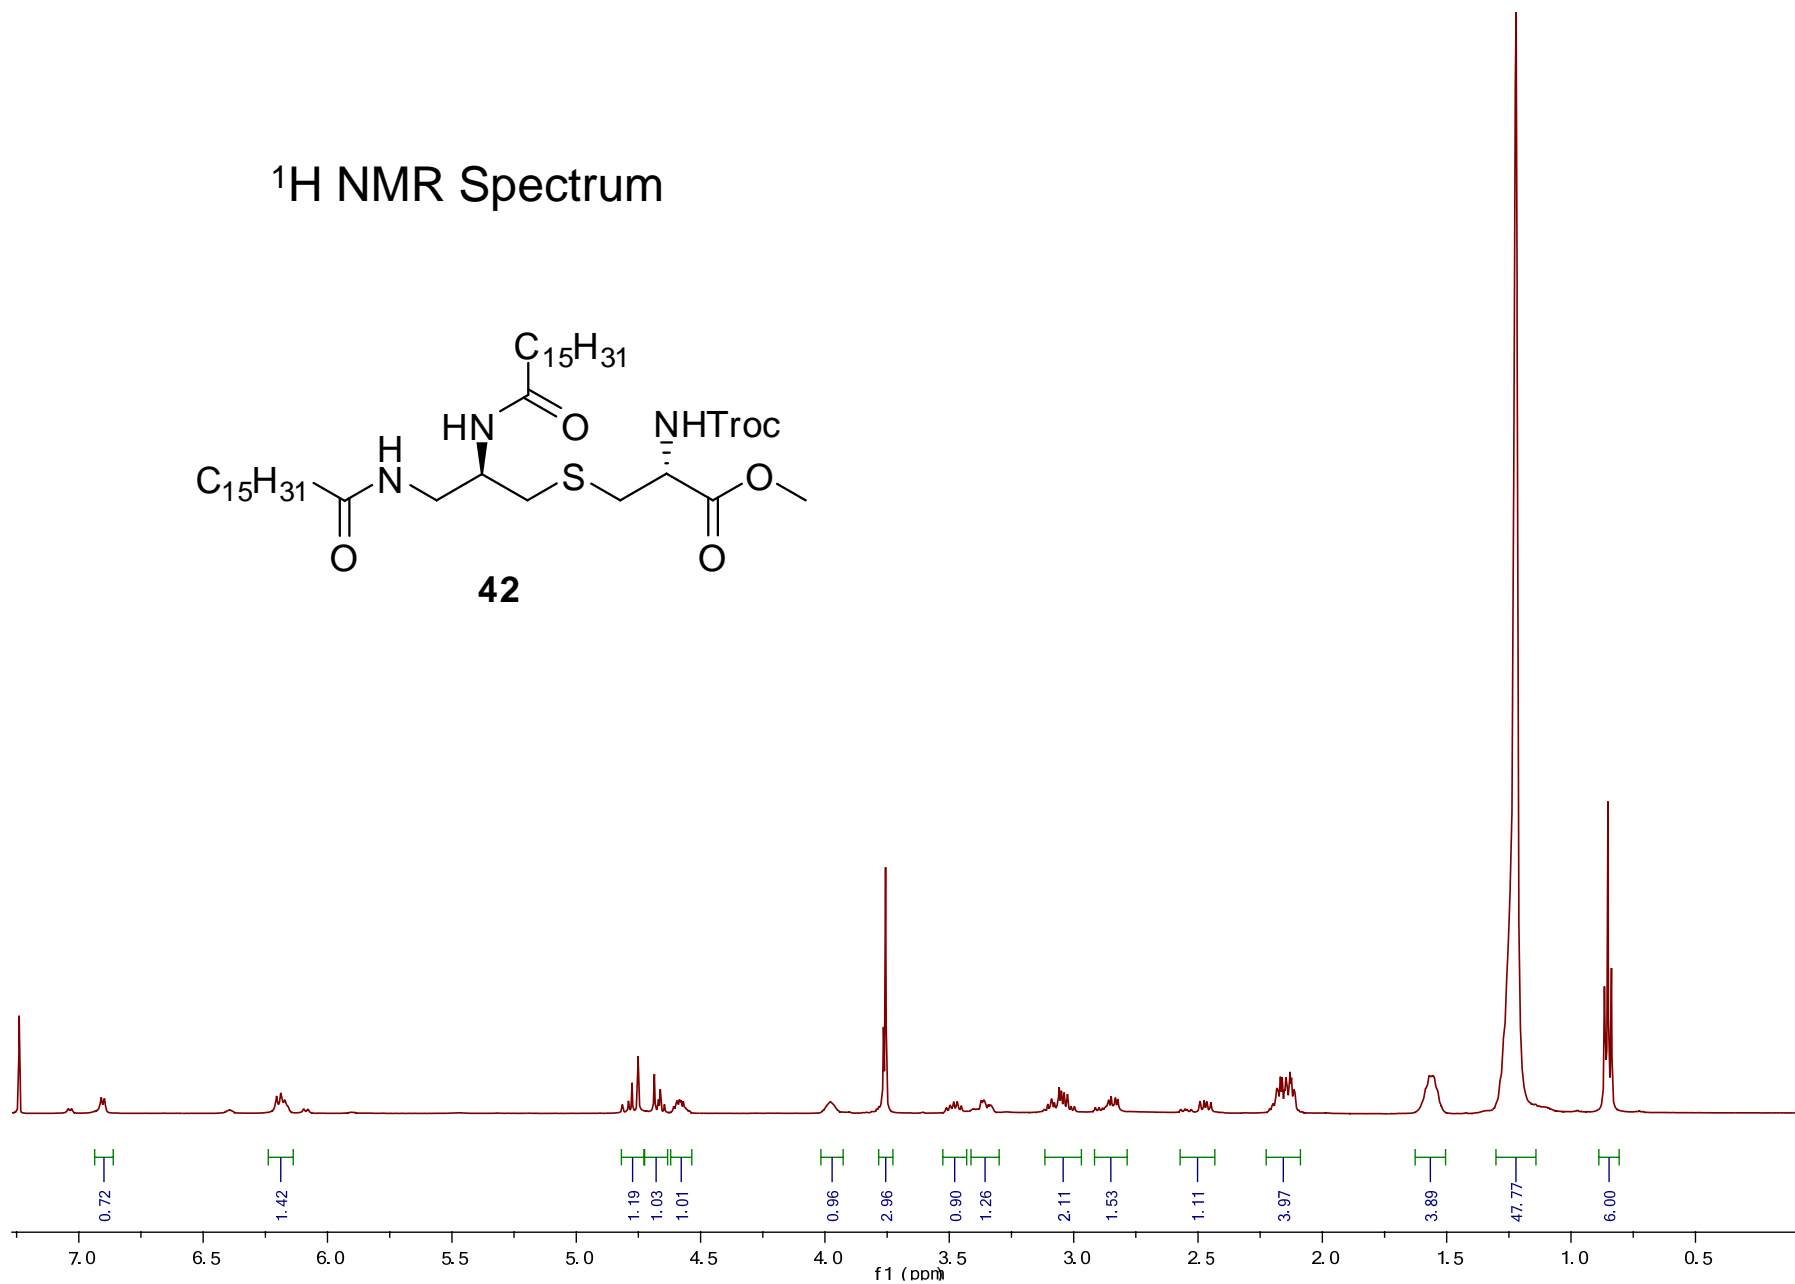

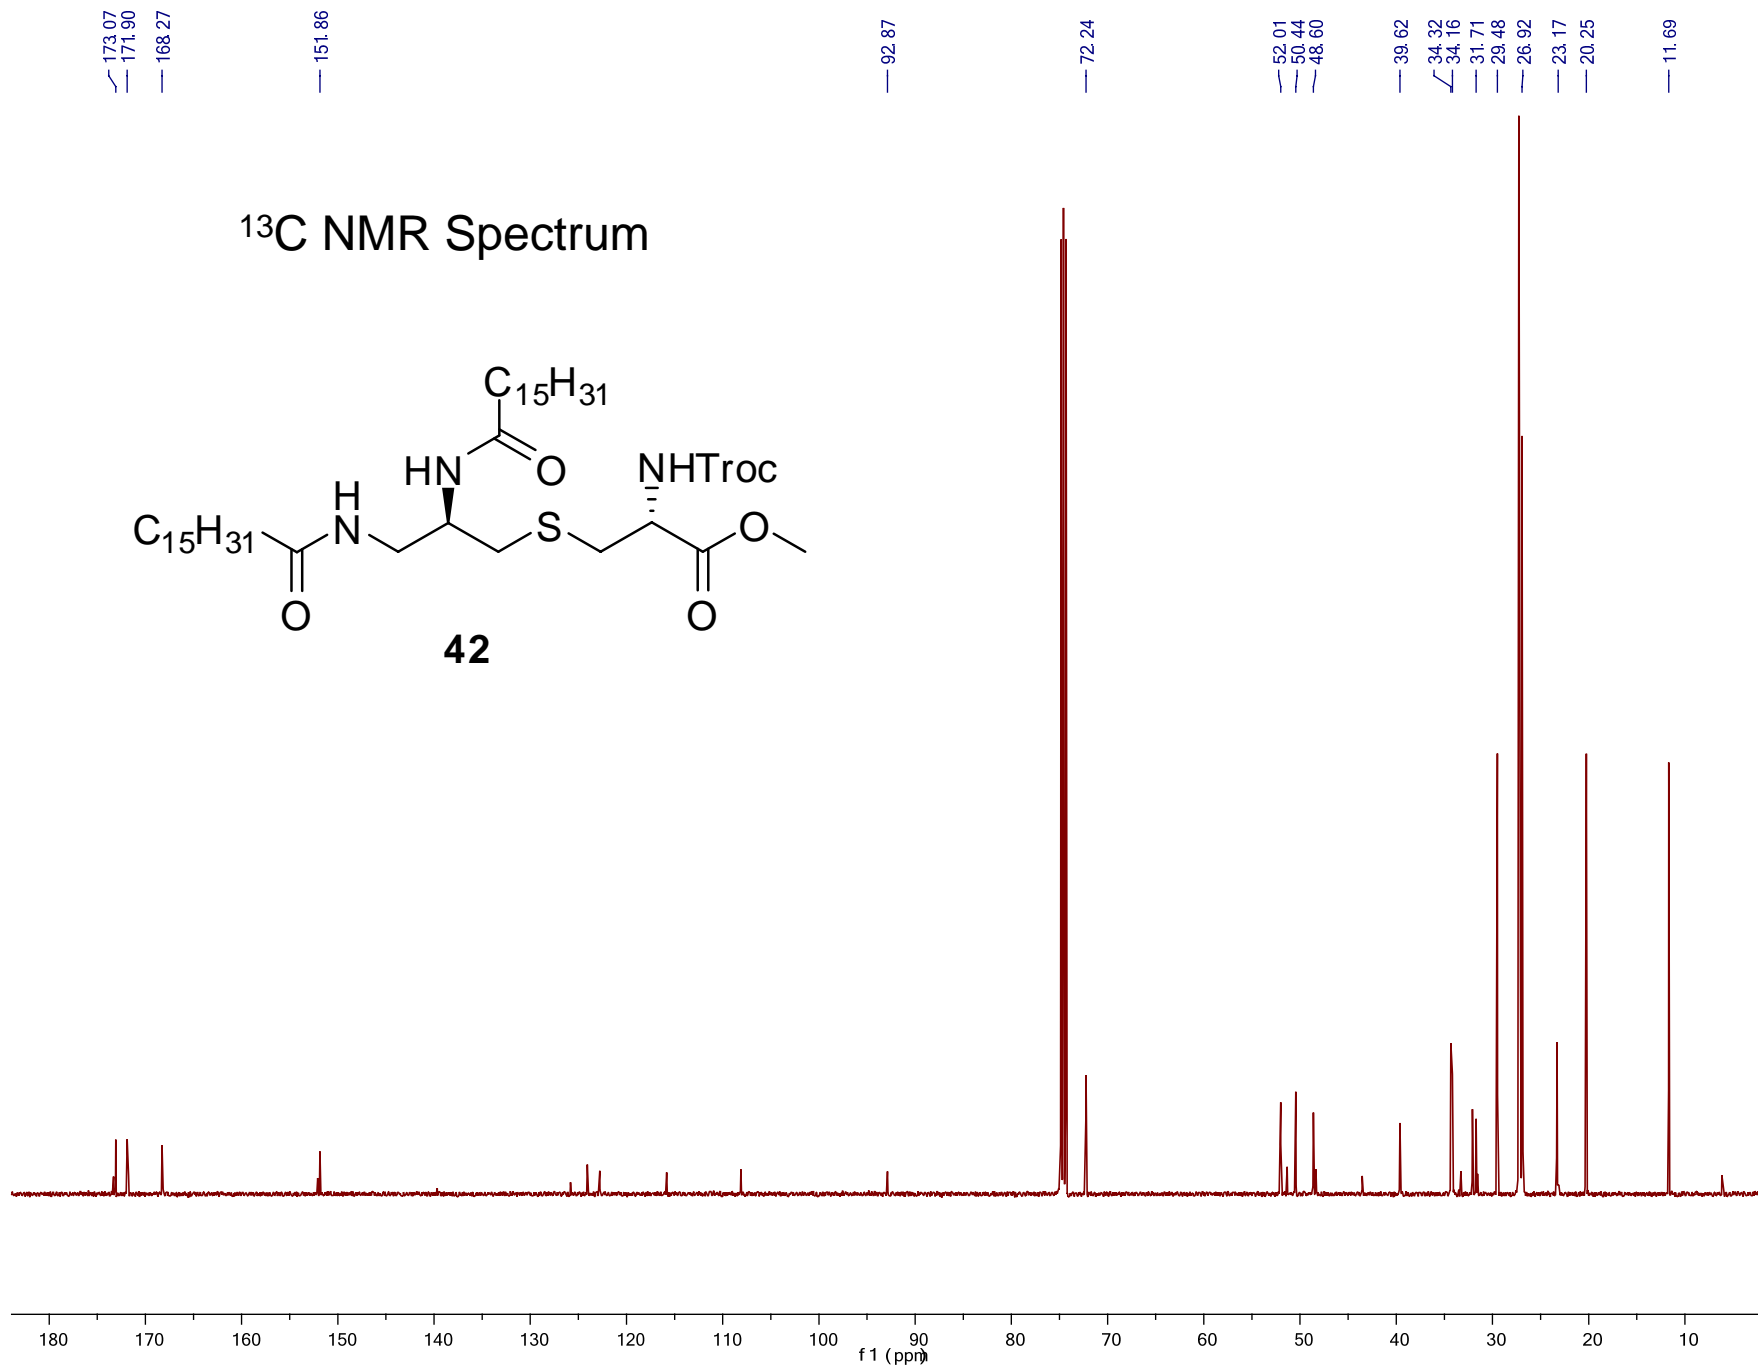

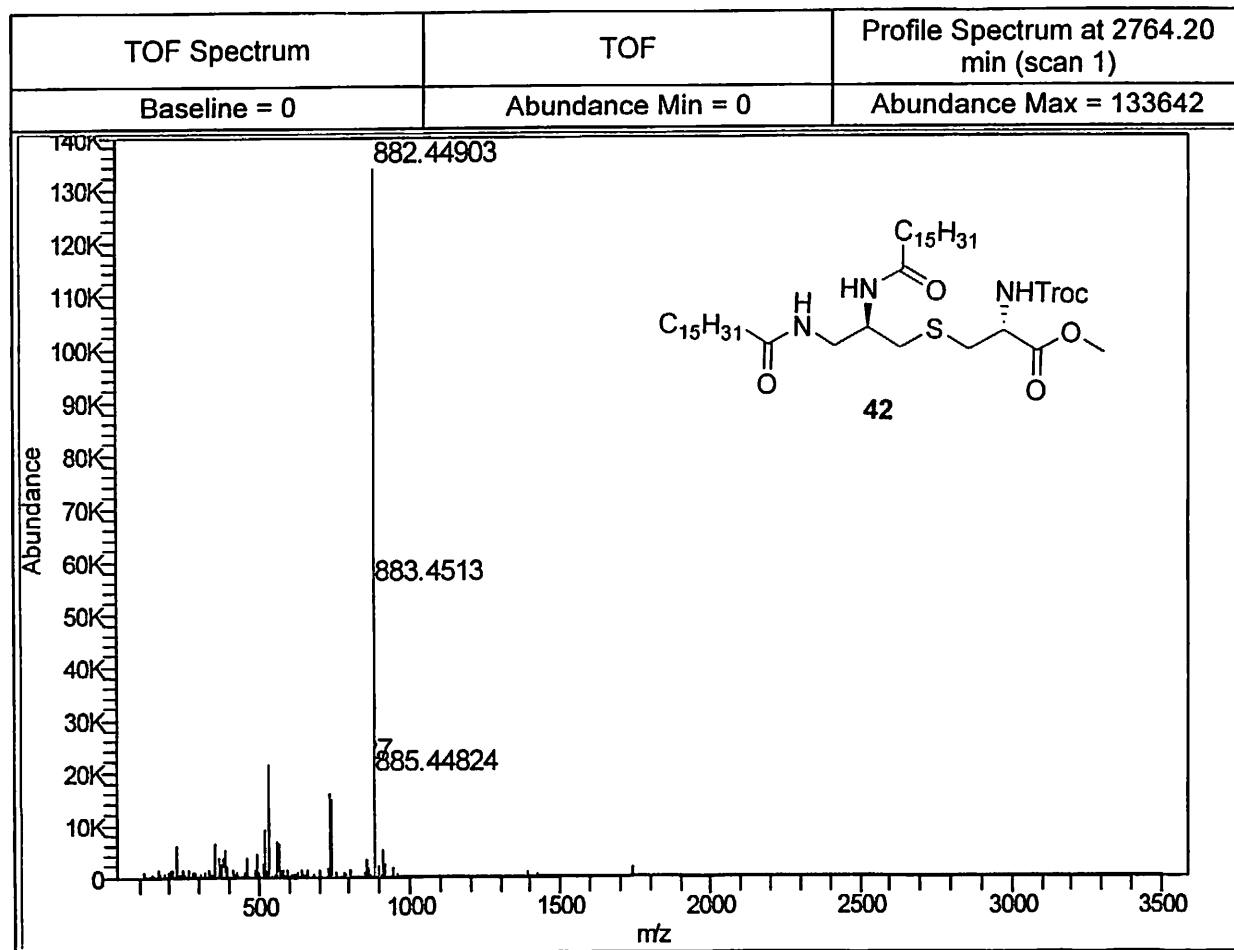

$^1\text{H}$  NMR Spectrum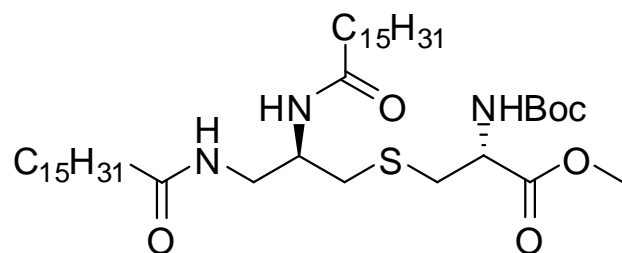

43

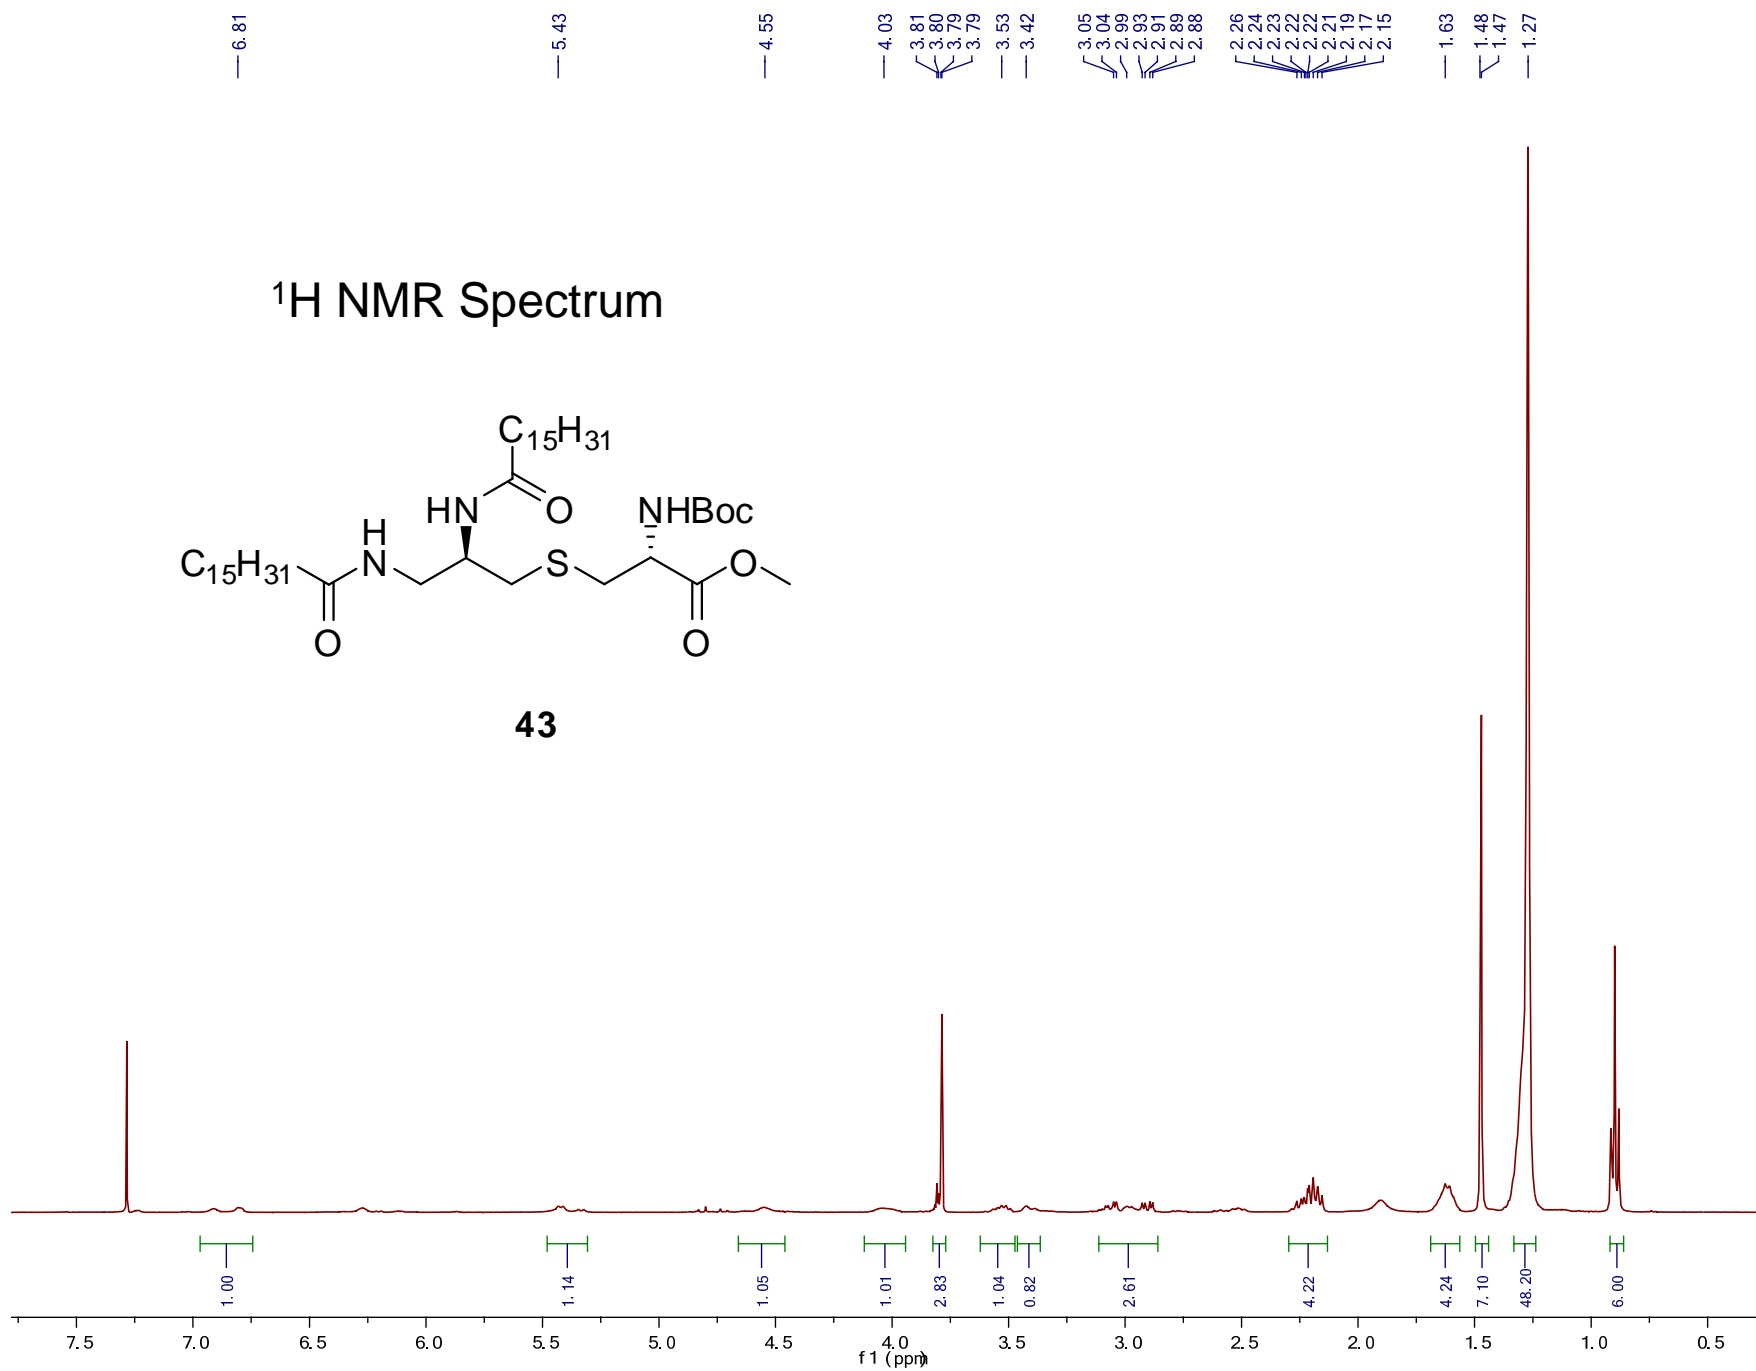

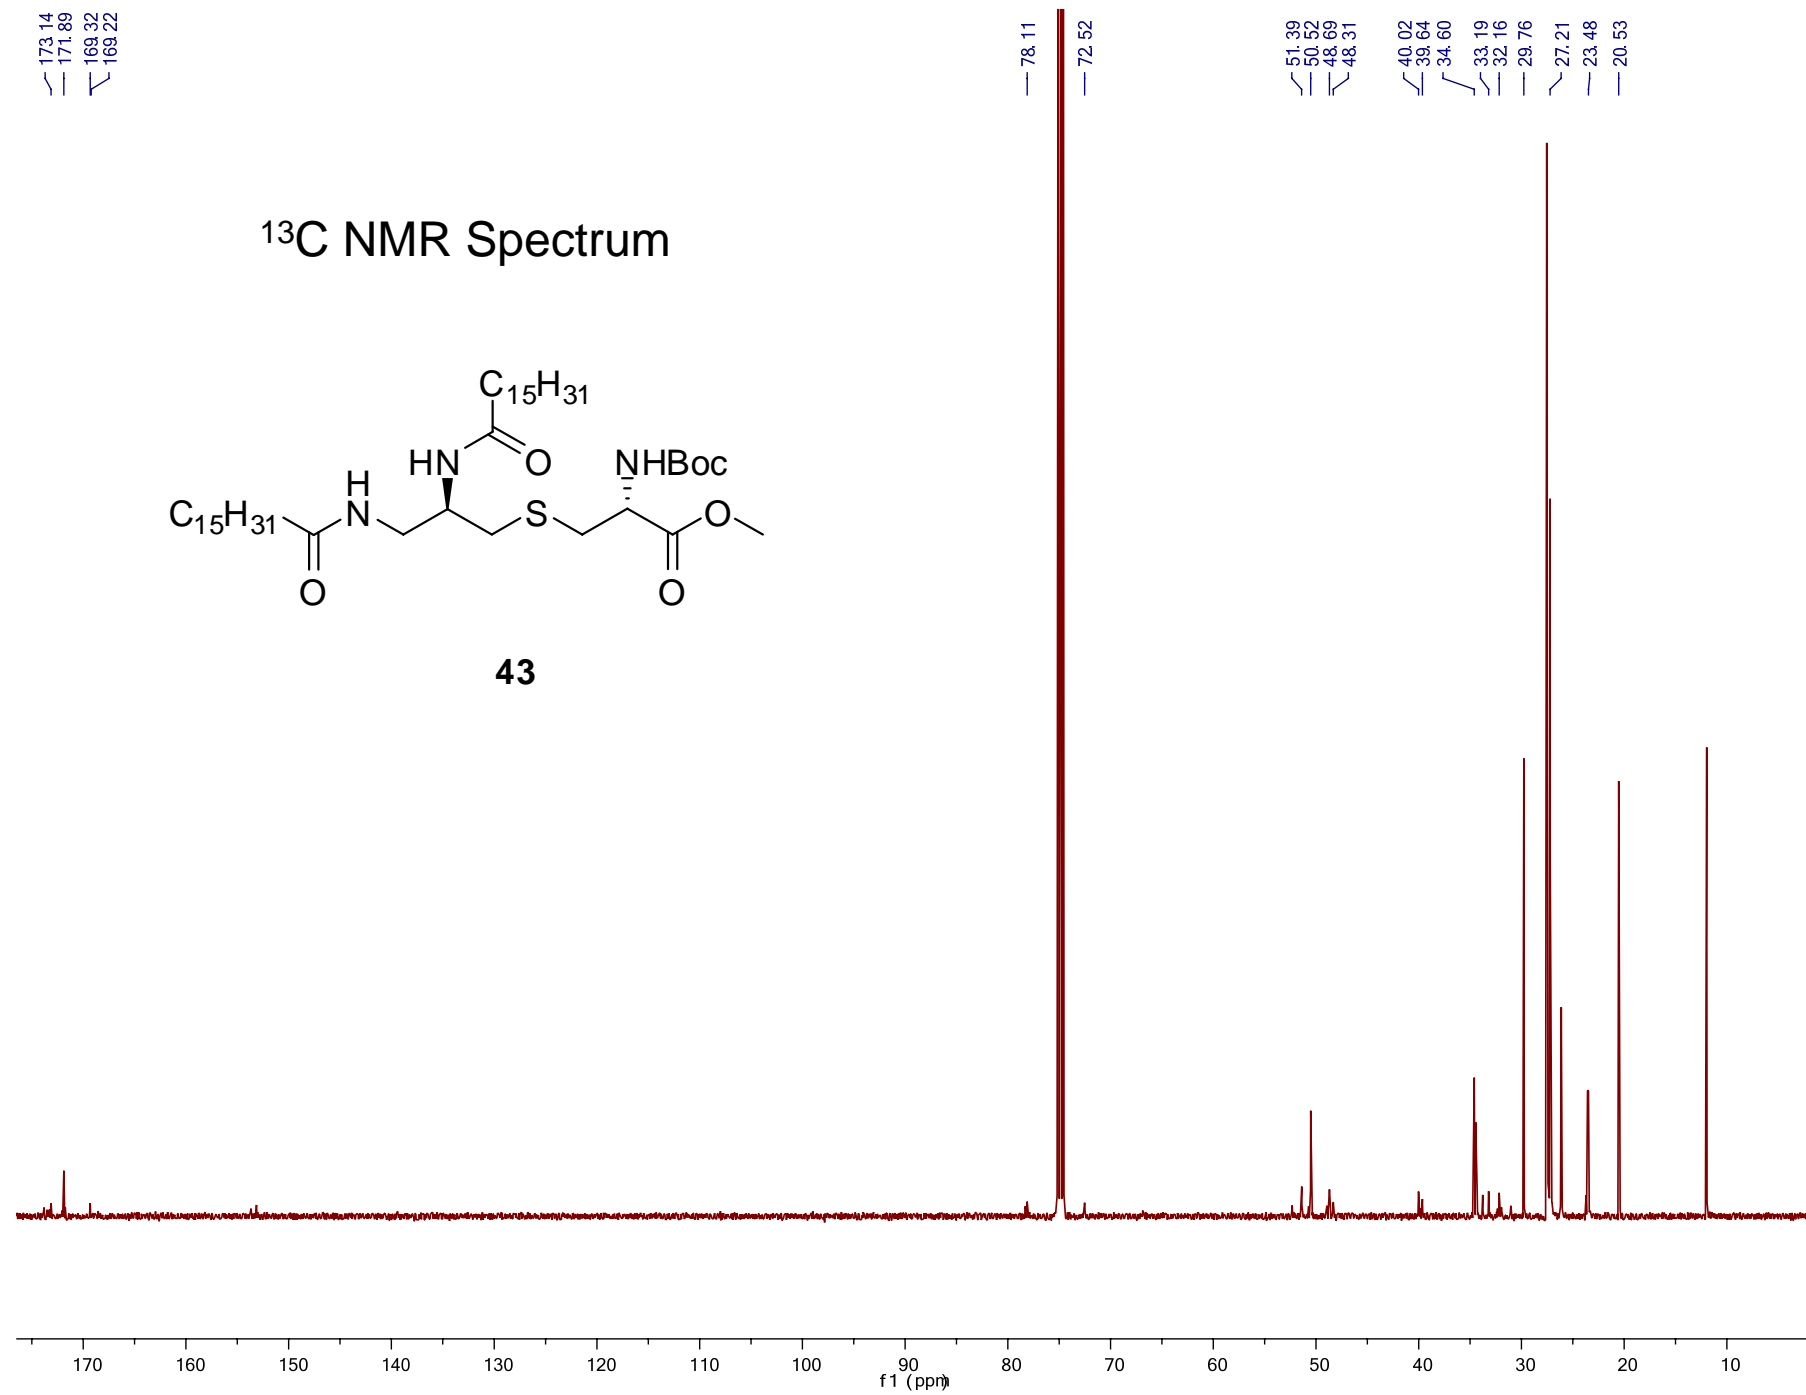



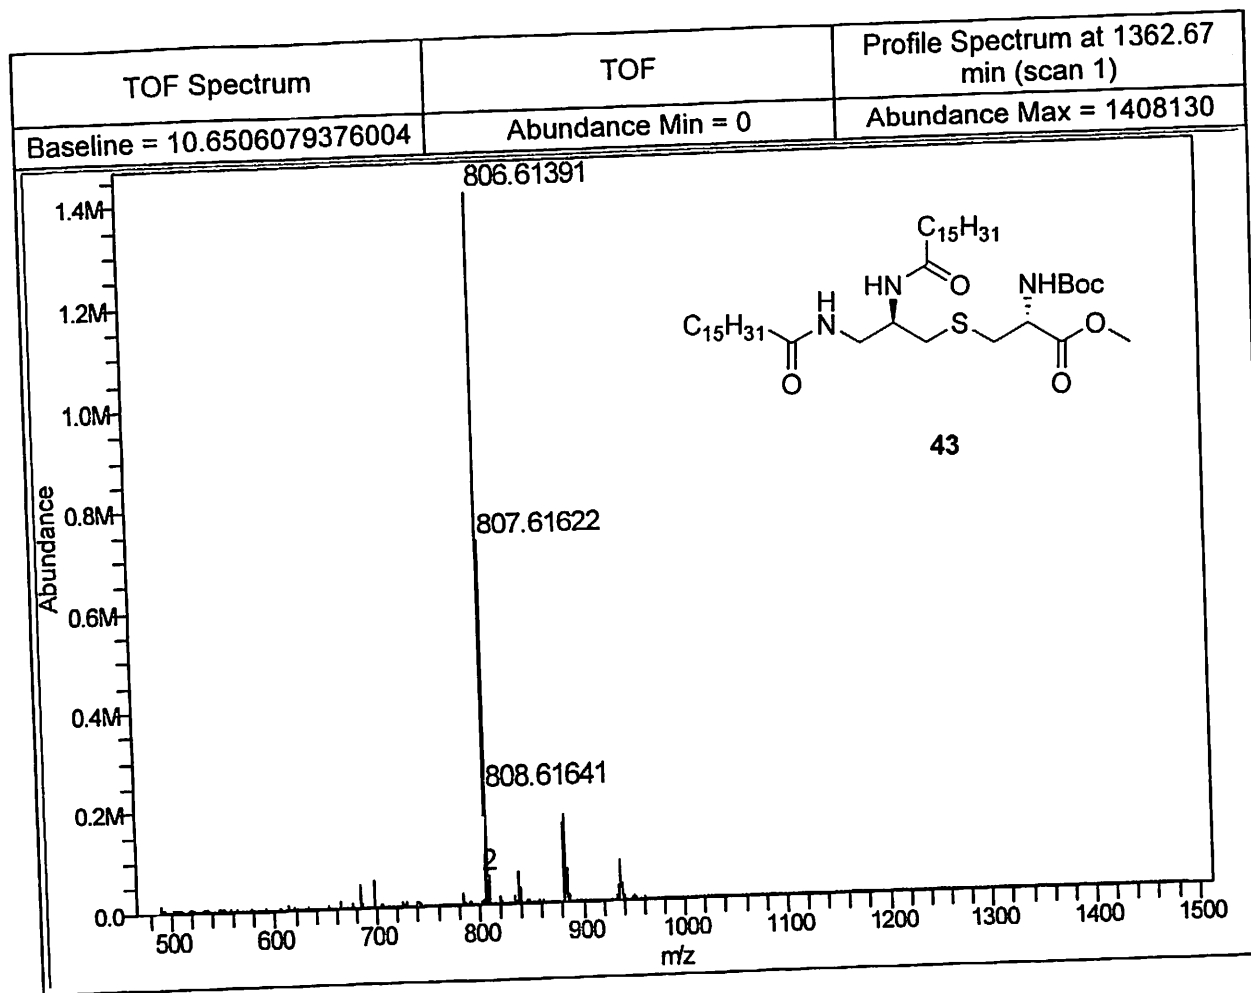

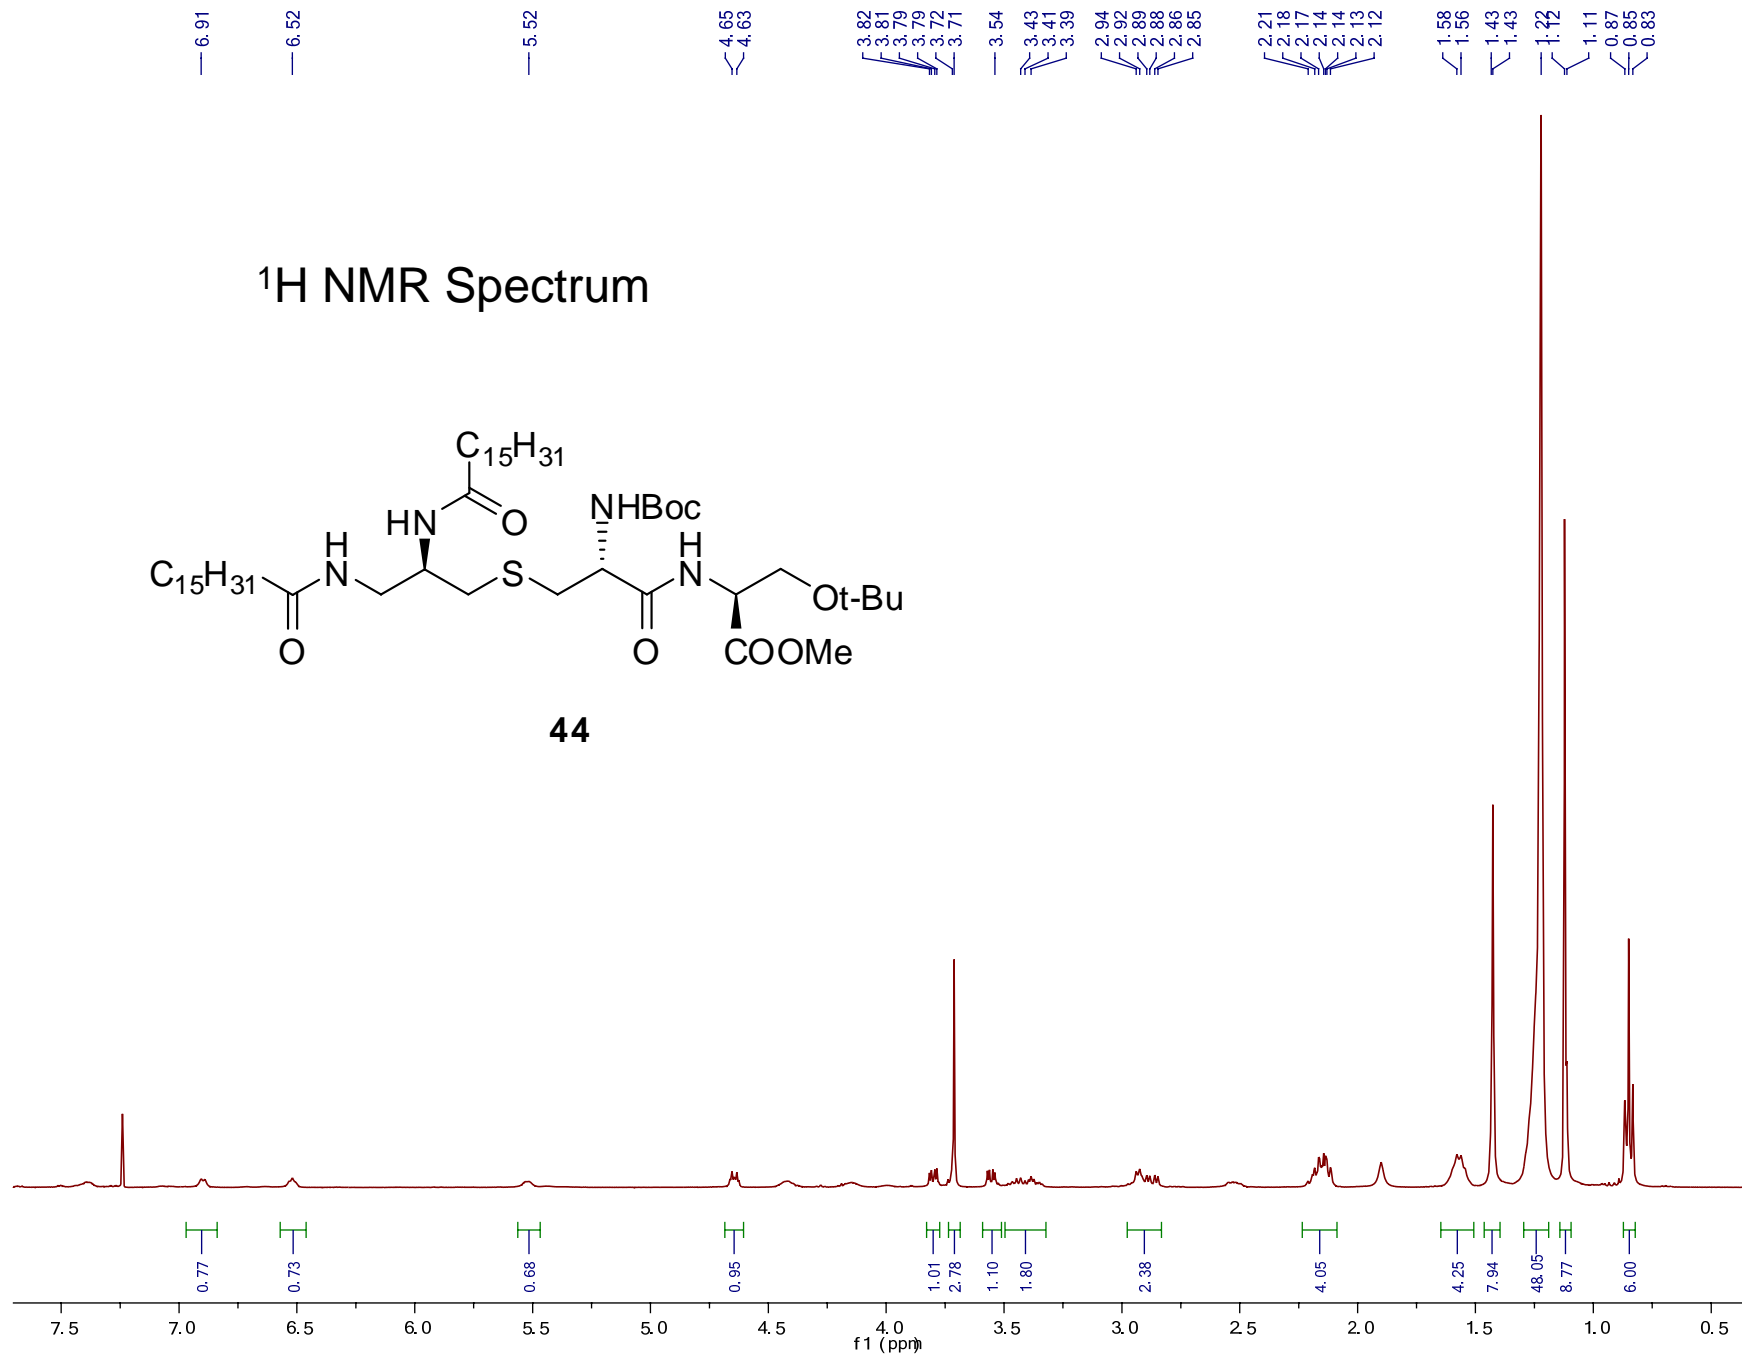

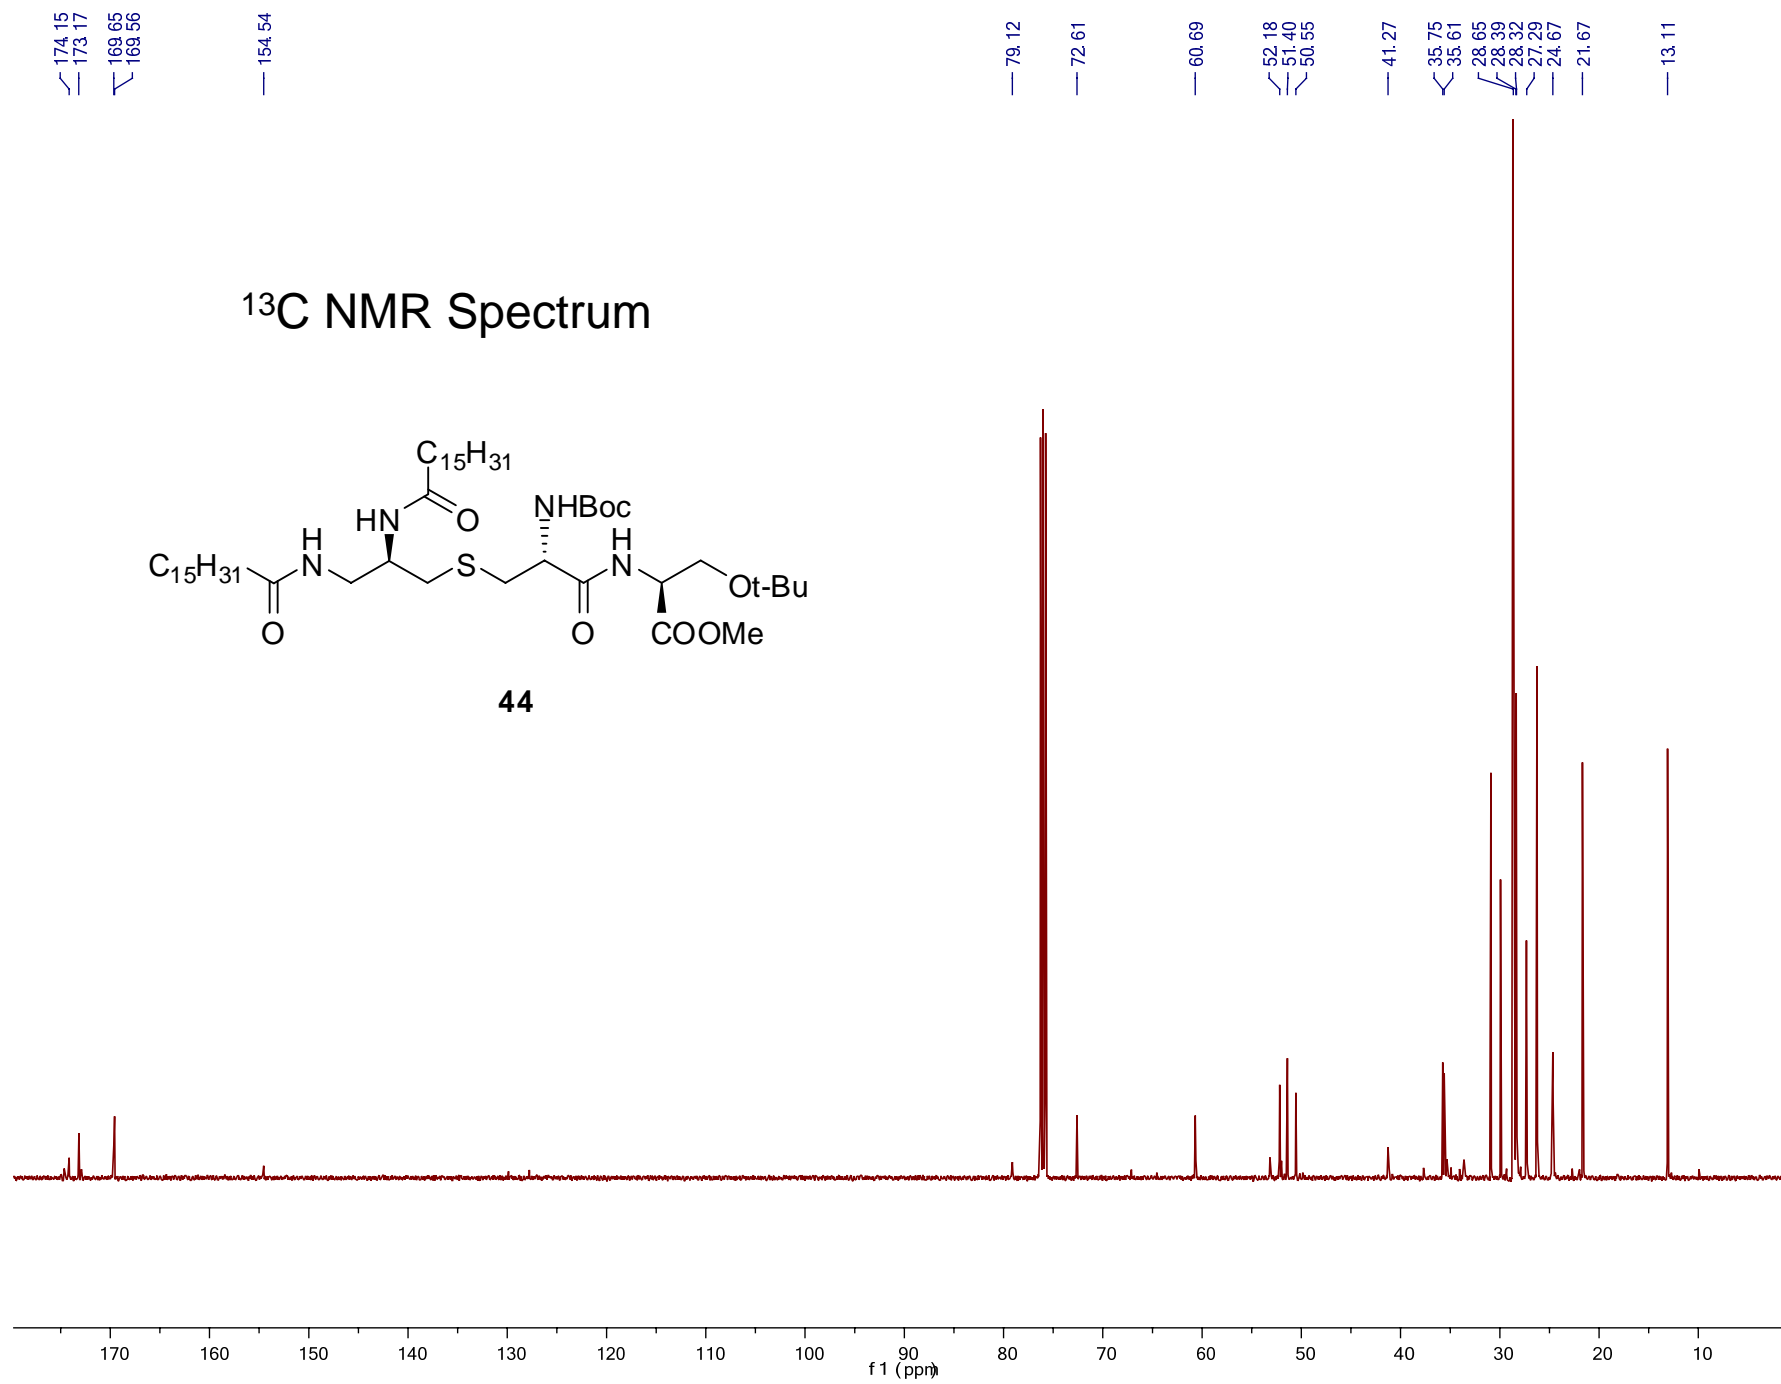

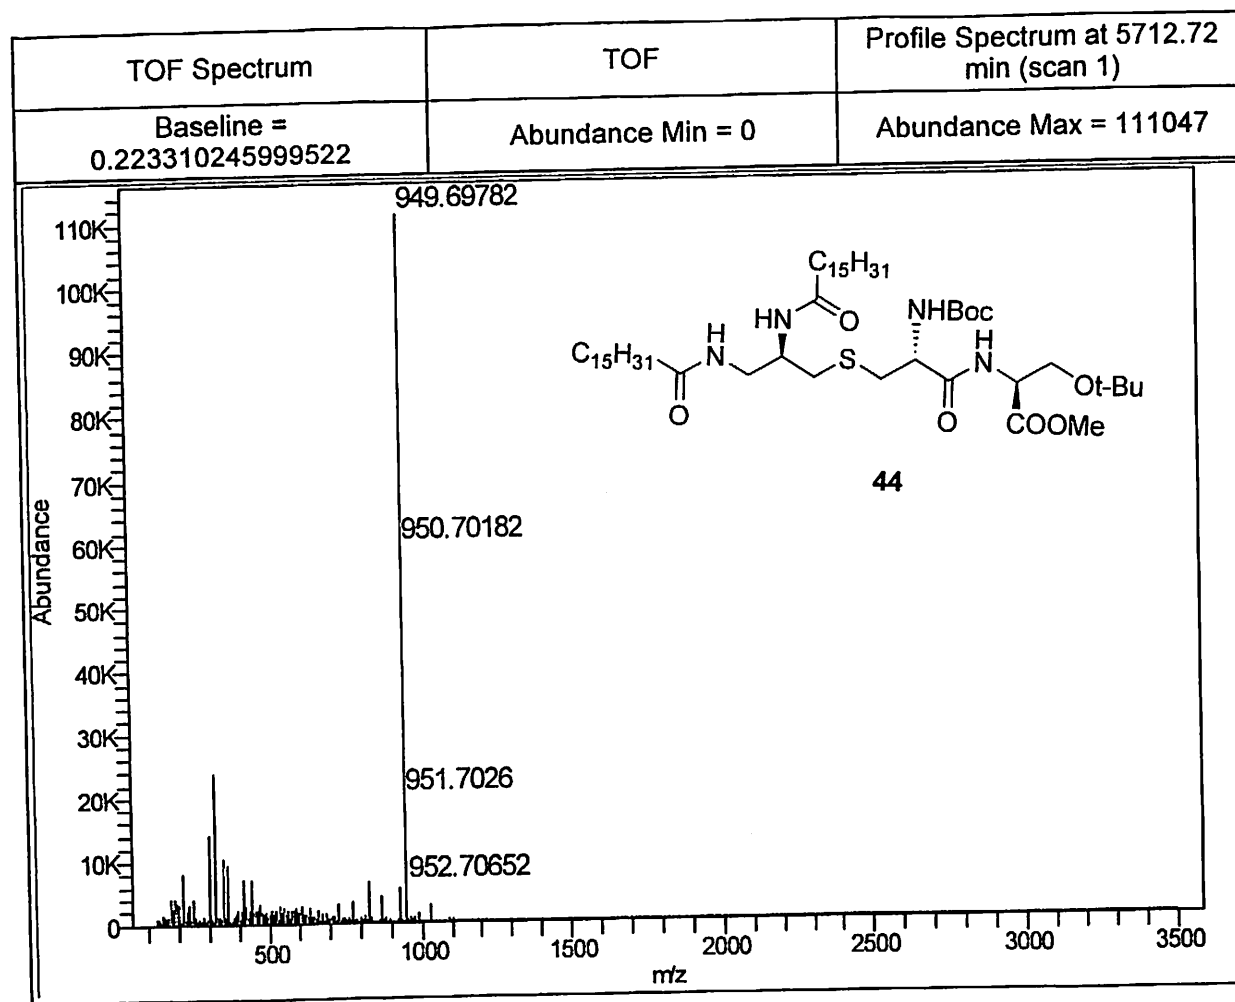

# $^1\text{H}$ NMR Spectrum

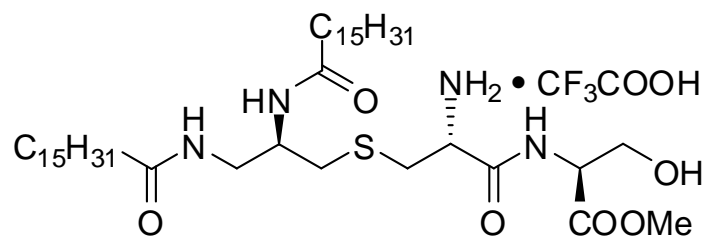

45

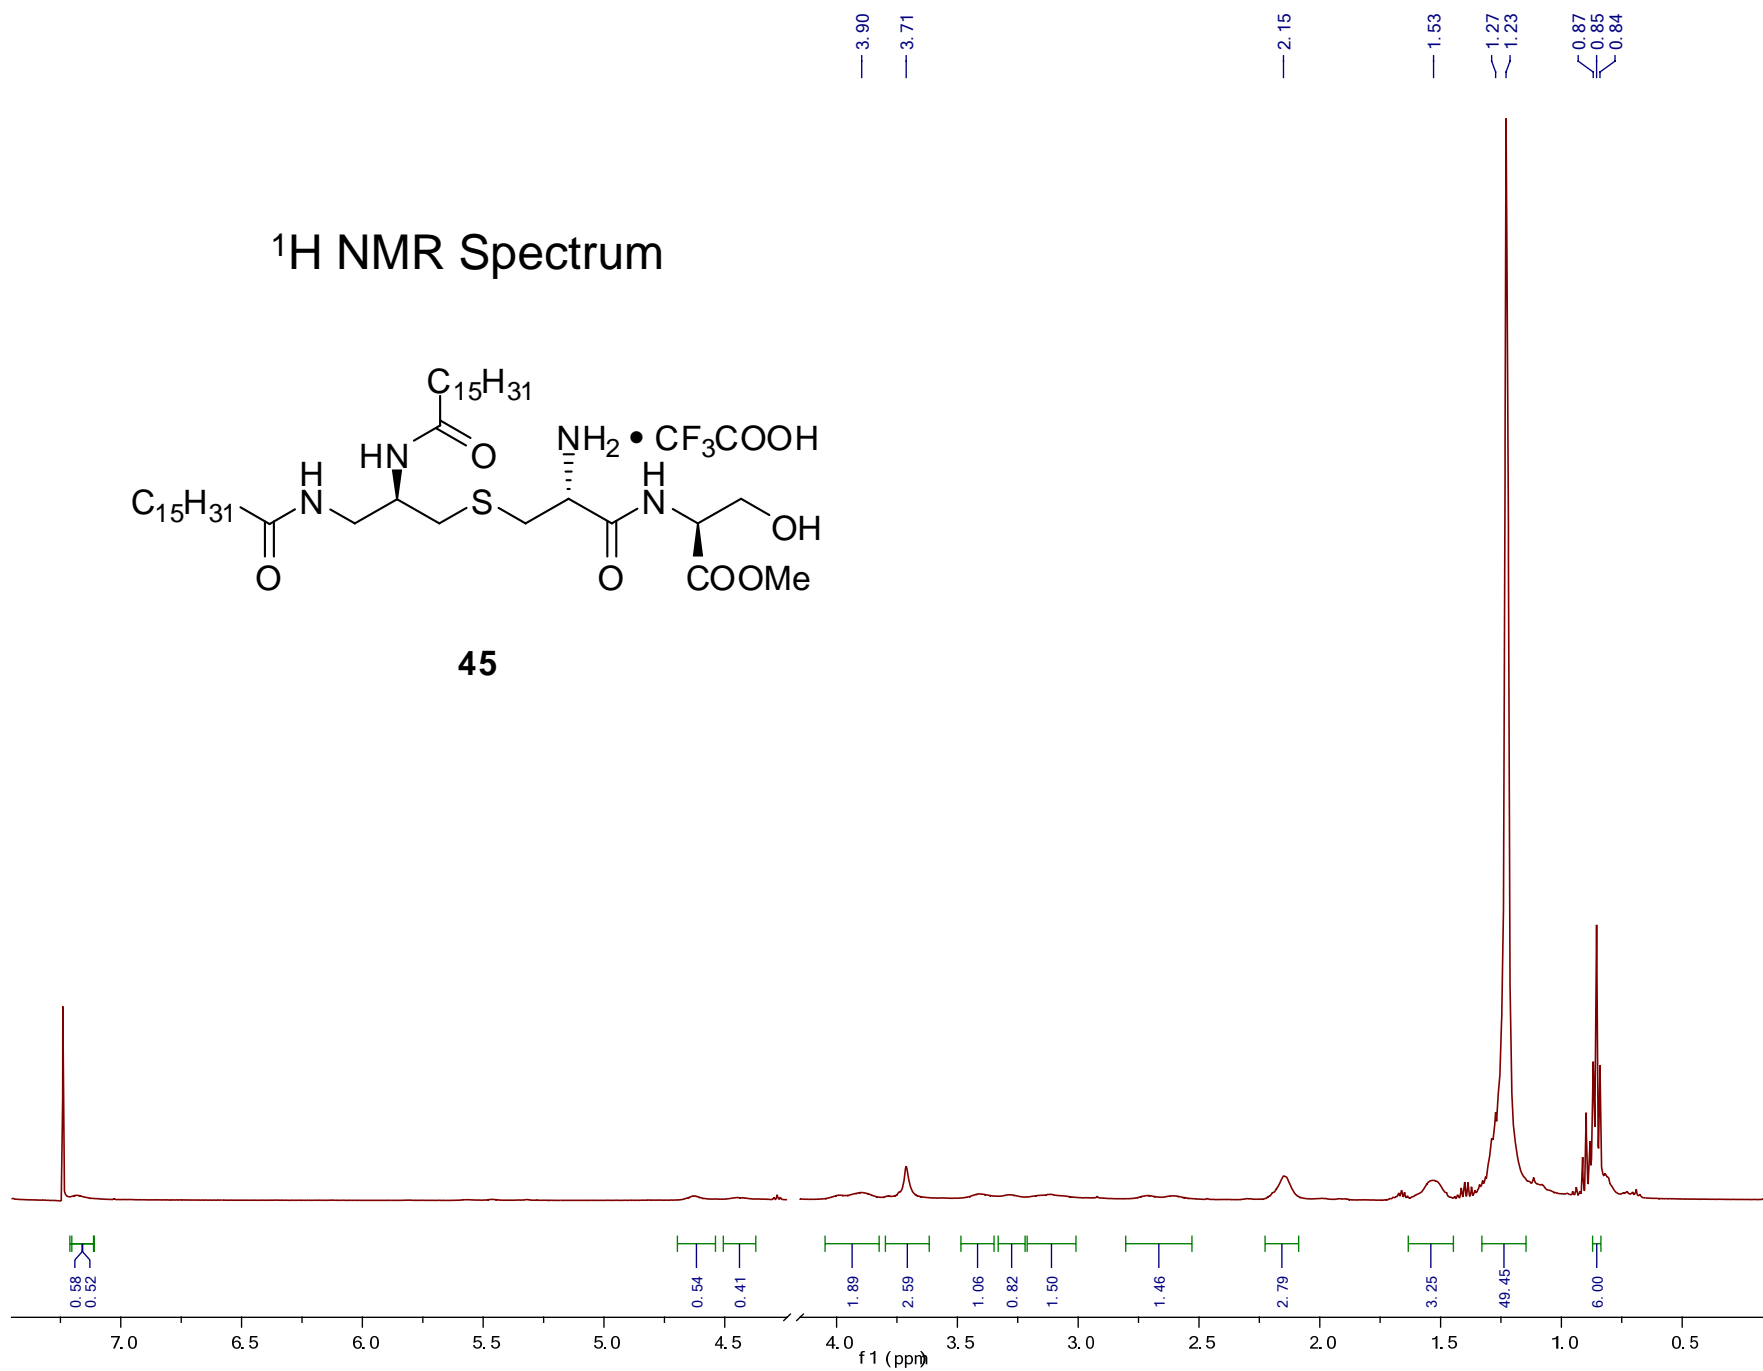

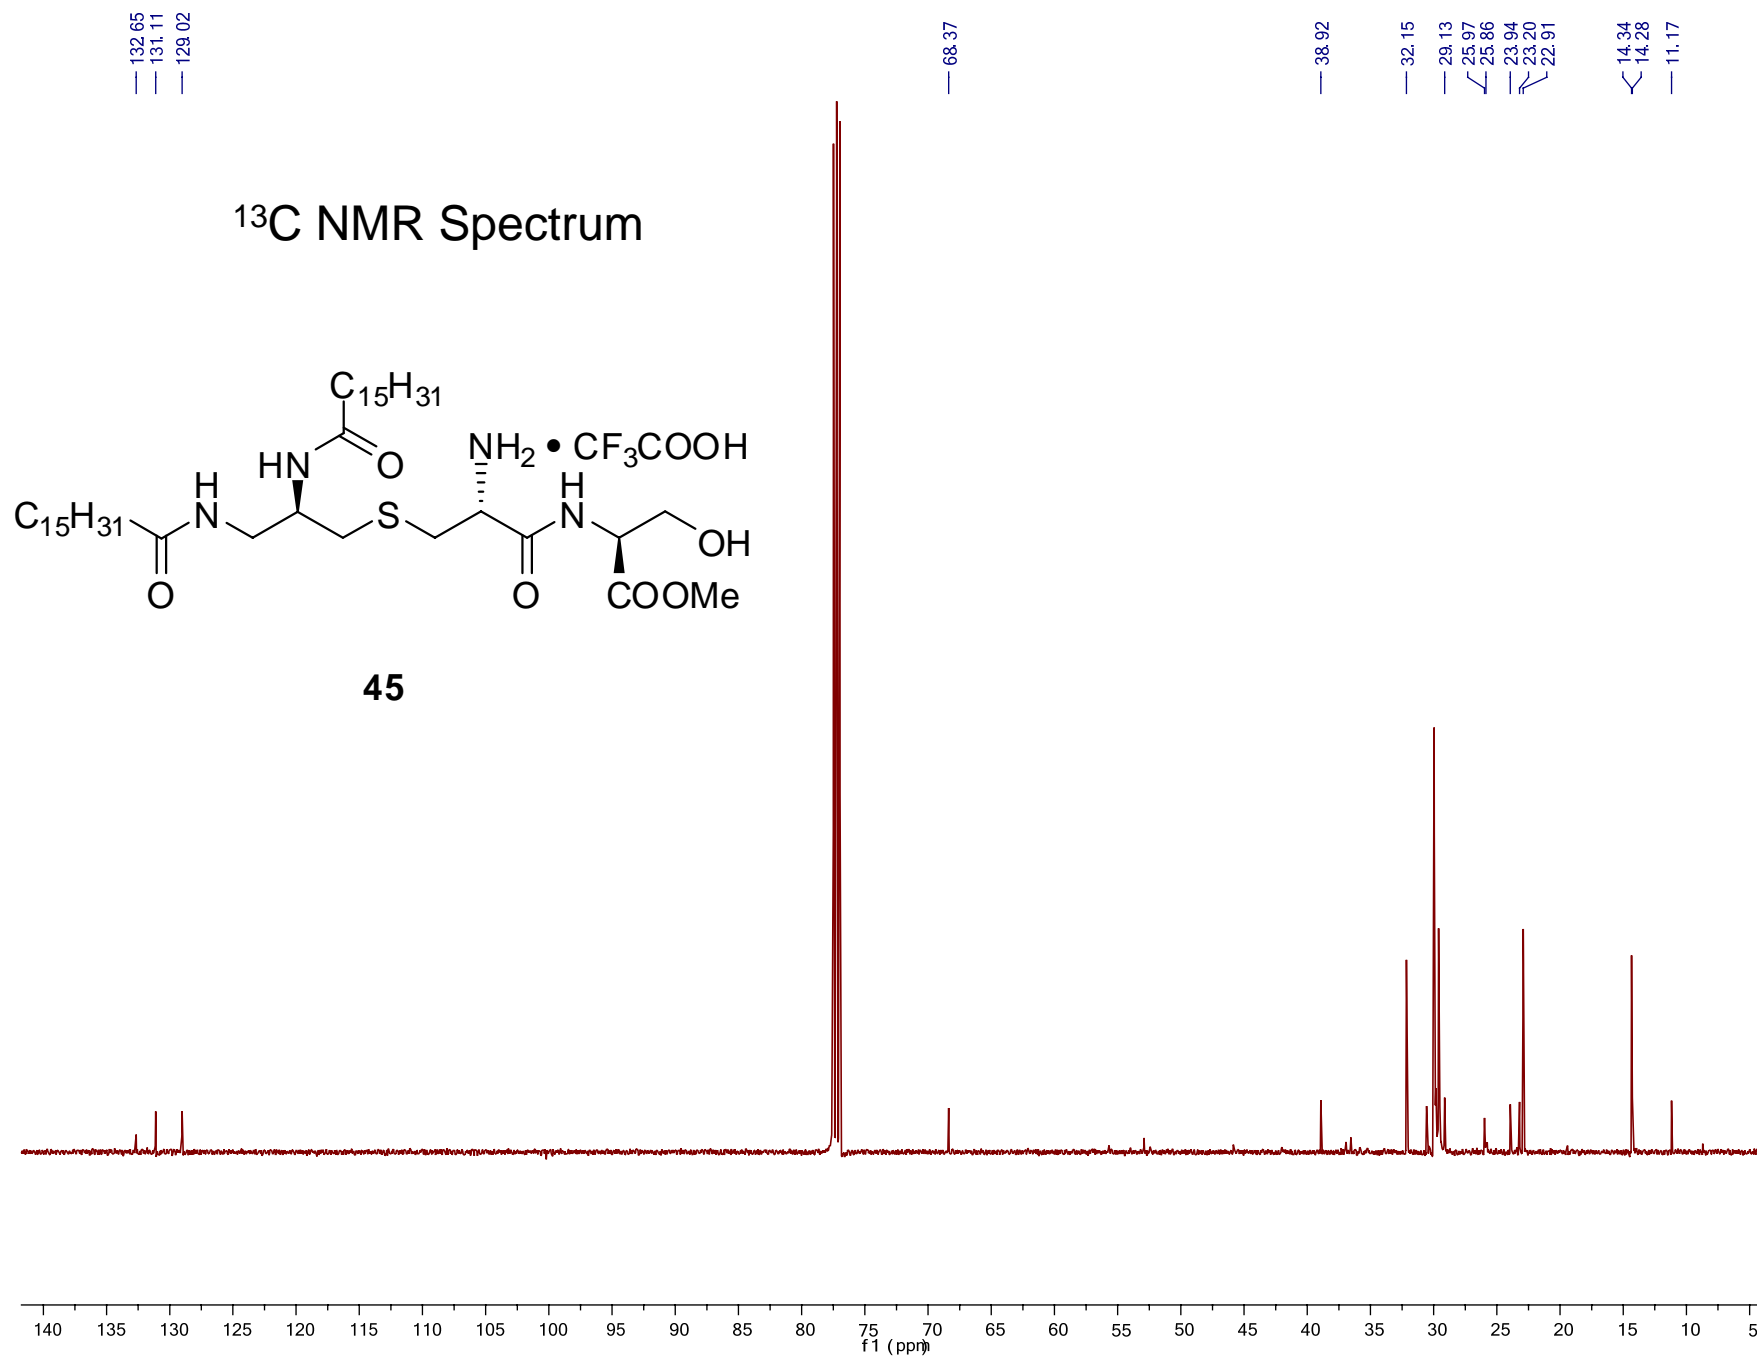

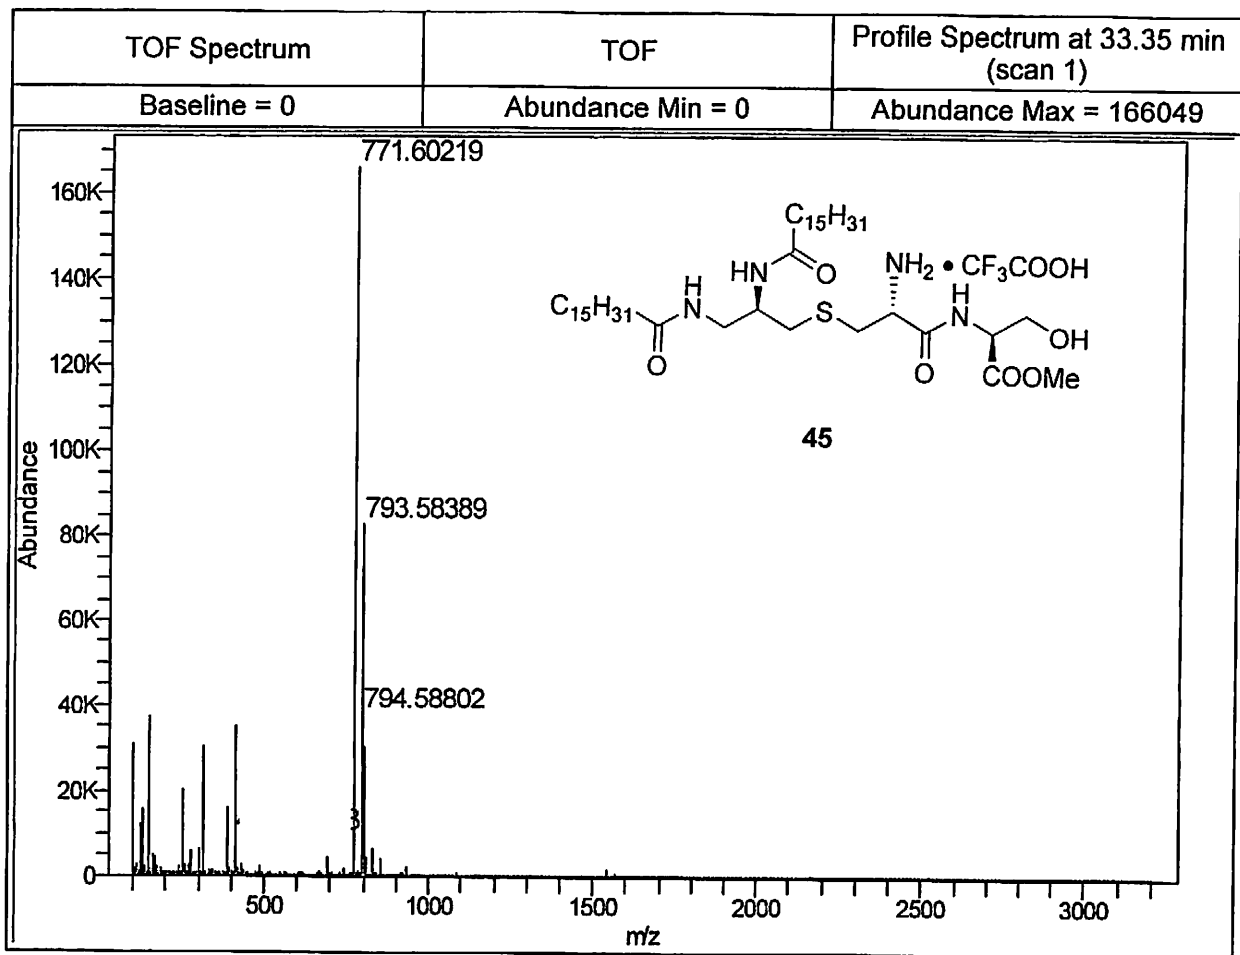

Supplement: NIHMS189908-supplement-1_si_001.pdf [file NIHMS189908-supplement-1_si_001.pdf]
